1       **No evidence for a common blood microbiome based on a**  
2                   **population study of 9,770 healthy humans**

3 Cedric C.S. Tan<sup>1,2</sup>, Karrie K.K. Ko<sup>1,3,4,5</sup>, Hui Chen<sup>1</sup>, Jianjun Liu<sup>1</sup>, Marie Loh<sup>6,7,8</sup>,  
4 SG10K\_Health Consortium, Minghao Chia<sup>1#</sup>, Niranjan Nagarajan<sup>1,5#</sup>

5       1) Genome Institute of Singapore, A\*STAR, Singapore.

6       2) UCL Genetics Institute, University College London, UK.

7       3) Department of Microbiology, Singapore General Hospital, Singapore.

8       4) Department of Molecular Pathology, Singapore General Hospital, Singapore.

9       5) Yong Loo Lin School of Medicine, National University of Singapore, Singapore.

10       6) Population and Global Health, Lee Kong Chian School of Medicine, Nanyang  
11        Technological University, Singapore.

12       7) Department of Epidemiology and Biostatistics, Imperial College London, United  
13        Kingdom.

14       8) National Skin Centre, Singapore.

15       #These authors jointly supervised this work

16       Correspondence: [cedricstan@gmail.com](mailto:cedricstan@gmail.com) (C.C.S. Tan) or [nagarajann@gis.a-](mailto:nagarajann@gis.a-star.edu.sg)  
17       [star.edu.sg](mailto:nagarajann@gis.a-star.edu.sg) (N. Nagarajan)

## 18 **Abstract**

19 Human blood is conventionally considered sterile. Recent studies have challenged this,  
20 suggesting the presence of a blood microbiome in healthy humans. We present the  
21 largest investigation to date of microbes in blood, based on shotgun sequencing  
22 libraries from 9,770 healthy subjects. Leveraging the availability of data from multiple  
23 cohorts, we stringently filtered for laboratory contaminants to identify 117 microbial  
24 species detected in the blood of sampled individuals, some of which had signatures of  
25 DNA replication. These primarily comprise of commensals associated with human body  
26 sites such as the gut ( $n=40$ ), mouth ( $n=32$ ), and genitourinary tract ( $n=18$ ), which are  
27 species that are distinct from common pathogens detected in clinical blood cultures  
28 based on more than a decade of records from a tertiary hospital. Contrary to the  
29 expectations of a shared blood microbiome, no species were detected in 84% of  
30 individuals, while only a median of one microbial species per individual was detected in  
31 the remaining 16%. Furthermore, microbes of the same species were detected in <5% of  
32 individuals, no co-occurrence patterns similar to microbiomes in other body sites was  
33 observed, and no associations between host phenotypes (e.g. demographics and blood  
34 parameters) and microbial species could be established. Overall, these results do not  
35 support the hypothesis of a consistent core microbiome endogenous to human blood.  
36 Rather, our findings support the transient and sporadic translocation of commensal  
37 microbes, or their DNA, from other body sites into the bloodstream.

## 38 Introduction

39 In recent years, there has been considerable interest regarding the existence of a  
40 microbiome in the blood of healthy individuals, and its links to health and disease.  
41 Human blood is traditionally considered a sterile environment (i.e., devoid of viable  
42 microbes), where the occasional entry and proliferation of pathogens in blood can  
43 trigger a dysregulated host response, resulting in severe clinical sequelae such as  
44 sepsis, septic shock or death<sup>1</sup>. Asymptomatic transient bacteraemia (i.e., bacterial  
45 presence in blood) in blood donors is also known to be a major cause of transfusion-  
46 related sepsis<sup>2</sup>. Recent studies have suggested the presence of a blood microbiome,  
47 providing evidence for microbes circulating in human blood for healthy individuals<sup>3-7</sup>  
48 (reviewed in Castillo *et al*<sup>8</sup>). However, most of these studies were either done in  
49 relatively small cohorts or lacked rigorous checks to distinguish true biological  
50 measurements from different sources of contamination<sup>8</sup>. As such, the concept of a  
51 microbial community present in the blood of healthy individuals remains controversial  
52 and is an area of active research. In this work, we analysed blood DNA sequencing data  
53 from a population study of healthy individuals, comprising of multiple cohorts processed  
54 by different laboratories with varied sequencing kits. By leveraging the large dataset  
55 ( $n=9,770$ ) complete with batch information in our systematic differential analyses for  
56 potential contaminants, our aim was to determine whether a blood microbiome truly  
57 exists in the general population.

58 For meaningful discourse, it is useful to formalise what the presence of a hypothetical  
59 'blood microbiome' entails. Berg *et al.*<sup>9</sup> concluded that the term microbiome should refer  
60 to a community of microbes that interact with each other and with the environment in  
61 their ecological niche, which in our context is human blood. Therefore in a blood  
62 microbiome, the presence of microbial cells in blood from healthy individuals should  
63 exhibit community structures indicated by co-occurrence or mutual exclusion of  
64 species<sup>10</sup> as seen in the microbiomes of other sites such as the gut<sup>11</sup> or mouth<sup>12</sup>.  
65 Furthermore, we may expect the presence of core microbial species, which can be  
66 defined as species that are frequently observed and shared across individuals<sup>13,14</sup>, such  
67 as *Staphylococcus epidermidis* on human skin<sup>15</sup>. More precisely, taxa that are found in

68 a substantial fraction of samples from distinct individuals (i.e. with high prevalence) may  
69 be considered 'core'. Notably, the prevalence threshold for defining core taxa is  
70 arbitrary, with previous microbiome studies using values ranging from 30-100% and  
71 many of these studies opting for 100%<sup>14</sup>. Regardless, identifying core microbes in blood  
72 would form the basis for associating microbiome changes with human health.

73 Existing studies have provided evidence for the presence of microbes in the blood of  
74 healthy individuals using both culture-based<sup>3,4</sup> and culture-independent<sup>5-7</sup> approaches.  
75 The former approach involves blood culture experiments while the latter involves one or  
76 a combination of the following molecular methods: 16S ribosomal RNA (rRNA)  
77 quantitative polymerase chain reaction (qPCR), 16S rRNA amplicon sequencing, and  
78 shotgun sequencing of RNA or DNA. Depending on the study design, these results  
79 should be interpreted with caution due to several methodological and technical  
80 limitations which include small sample sizes, limited taxonomic resolution, difficulties in  
81 distinguishing cell-free microbial DNA from live microbial cells, and the ubiquity of  
82 environmental contamination<sup>8,16-19</sup>. In particular, contaminating DNA must be accounted  
83 for in order to characterize the blood microbiome. The workflow of sample processing,  
84 from skin puncture during phlebotomy, to microbial detection, is rife with opportunities  
85 for microbes or microbial nucleic acids to be introduced. Contaminating microbial cells  
86 introduced due to poor aseptic technique or insufficient disinfection of the skin puncture  
87 site<sup>20</sup> affects both culture-dependent and culture-independent approaches. Sequencing-  
88 based approaches are especially sensitive to contaminant microbial DNA native to  
89 laboratory reagent kits (i.e., the 'kitome')<sup>19</sup>, exacerbated by the low microbial biomasses  
90 in blood, accompanied by high host background which increases the noise-to-signal  
91 ratio<sup>17</sup>. Correspondingly, comprehensive profiling of the breadth and prevalence of  
92 microbial species in blood after accounting for external sources of contamination has  
93 not yet been done and several aspects of the 'blood microbiome' remain unclear. For  
94 instance, are the detected microbes endogenous to blood or translocated from other  
95 body sites? Is there a core set of microbes that circulates in human blood? Is there a  
96 microbial community whose structure and function could influence host health?

97 To address these questions, we performed the largest scale analysis of a blood  
98 sequencing dataset to date, based on DNA libraries for 9,770 healthy individuals from

99 six distinct cohorts (**Supplementary Table 1**). We applied various bioinformatic  
100 techniques to differentiate DNA signatures of microbes in blood from potential reagent  
101 contaminants and sequence analysis artefacts, leveraging the differences in reagent  
102 kits used to process each cohort. We detected 117 microbial species in the blood of  
103 these healthy individuals, most of which are commensals associated with the  
104 microbiomes of other body sites. Additionally, we identified DNA signatures of  
105 replicating bacteria in blood using coverage-based peak-to-trough ratio analyses<sup>21,22</sup>,  
106 providing a culture-independent survey that has not been achieved previously. Despite  
107 this, we found no evidence for microbial co-occurrence relationships, core species, or  
108 associations with host phenotypes. These findings challenge the paradigm of a ‘blood  
109 microbiome’ and instead support a model whereby microbes from other body sites (e.g.  
110 gut, oral) sporadically translocate into the bloodstream of healthy individuals, albeit  
111 more commonly than previously assumed. Overall, our observations serve to establish  
112 a much needed baseline for the use of clinical metagenomics in investigating  
113 bloodstream infections.

## 114 **Results**

### 115 **Robust inference of microbial DNA signatures in blood based on multi-cohort** 116 **analysis**

117 Blood samples from healthy individuals typically contain low microbial biomass  
118 accompanied by high host DNA background<sup>17</sup>, making it difficult to discriminate between  
119 biologically relevant signals from artefactual ones. We first addressed artefacts arising  
120 during bioinformatic sequence analysis by performing stringent quality control on  
121 samples (**Figure 1a**), comprising of read quality trimming and filtering, removal of low  
122 complexity sequences that are of ambiguous taxonomic origin, exclusion of reads that  
123 likely originate from human DNA (**Methods**), and removal of samples with low number  
124 of reads (<100 read pairs) of microbial origin after taxonomic classification with  
125 *Kraken2*<sup>23</sup>. This provided a species-level characterisation of microbial DNA signatures in  
126 blood for most ( $n=8,892$ ) samples. To minimise noise due to false positive taxonomic  
127 assignments, we applied an abundance-cutoff based filter to discriminate between  
128 species that are likely present from those that could be misclassification artefacts

129 **(Methods)**. Additionally, we validated the reliability of the microbial species detected via  
130 *Kraken2* by comparison to read alignment analysis using reference genomes, where  
131 recovery of large fractions of a microbial reference covered uniformly by mapped reads  
132 improves our confidence that they are true positives as opposed to sequencing or  
133 analysis artefacts<sup>24,25</sup>. We validated 96% of the microbial species that had sufficient  
134 read coverage using this mapping-based approach. We further observed an excellent  
135 linear relationship between the number of *Kraken2*-assigned read pairs and the number  
136 of aligned read pairs on the log<sub>10</sub> scale (slope=1.15;  $F=154$ ,  $d.f.=1$ ,  $p<0.001$ ;  
137 **Supplementary Figure 1**), suggesting that *Kraken2* taxonomic assignments are a  
138 reliable proxy for the more precise and stringent read alignment approach. These  
139 findings collectively provide confidence that the microbial species detected in our blood  
140 sequencing libraries are not likely sequence analysis artefacts.

141 To address artefactual signals arising due to reagent and handling contamination during  
142 sample processing, we used a series of stringent decontamination filters (**Figure 1a**).  
143 These filters are based on the idea that contamination artefacts will lead to false positive  
144 detections that are often correlated with each other (within-batch consistency) and  
145 biased towards specific laboratory batches (between-batch variability; **Supplementary**  
146 **Figure 2**)<sup>26</sup>, and such analysis was found to be highly effective for *in silico*  
147 decontamination in previous studies<sup>27–29</sup> (**Methods**). Additionally, the identification of  
148 batch-specific contaminants in this study was greatly aided by the availability of multiple  
149 large cohorts of healthy individuals (**Supplementary Table 1**), and corresponding rich  
150 batch information, including reagent kit types and lot numbers. Application of reagent  
151 and handling contamination filters resulted in a final list of 117 microbial species that  
152 were detected in the whole blood samples of 8,892 individuals (**Supplementary Table**  
153 **2**). The list of 117 confidently detected microbial species spanned 56 genera, and  
154 comprised of 110 bacteria, 5 viruses and 2 fungi.

155 To estimate the effectiveness of our filtering strategy in improving biological signal while  
156 reducing contamination noise, we examined the types of microbial species detected in  
157 our dataset before (870 species) and after (117 species) all filters were applied (**Figure**  
158 **1b-d**). Firstly, the microbial species were cross-referenced against a published list of  
159 common genera seen as contaminants in sequencing data as curated by Poore *et al*<sup>30</sup>

160 and derived from the list published by Salter *et al*<sup>19</sup>. In this list, genera were either  
161 classified as likely contaminants, mixed-evidence (i.e., both a pathogen and common  
162 contaminant), or potential pathogens/commensals. Following decontamination, the  
163 proportion of detected species that are classified as contaminants decreased from 21%  
164 to 10% (**Figure 1b**). Next, the microbial species were compared against human blood  
165 culture records spanning more than a decade (2011-2021) from a tertiary hospital  
166 (**Figure 1c**). These blood cultures were typically ordered if clinical indications of  
167 bacteraemia were present, and therefore represent the range of microbial species that  
168 are known to cause symptomatic infection as detected in a clinical setting. The  
169 proportion of species that have been cultured from blood increased from 12% to 27%  
170 after decontamination, suggesting that our filtering procedures enriched for microbial  
171 species which are capable of invading the bloodstream. Finally, we compared the  
172 proportion of human-associated microbes before and after decontamination using a  
173 host-pathogen association database describing the host range of pathogens<sup>31</sup> (**Figure**  
174 **1d**). For species that were not found in this database, a systematic PubMed search  
175 (**Methods**) was performed to determine if there was at least one past report of human  
176 infection. The proportion of human-associated species increased from 40% to 78% after  
177 decontamination, indicating that they are more likely to be biologically relevant. Finally,  
178 we tested our results against the null hypotheses that the 117 microbial species  
179 retained after decontamination produced the same proportions of species classified as  
180 likely contaminants, human-associated, or that were detected in blood culture compared  
181 to species picked at random (**Methods**). This analysis suggests that our  
182 decontamination filters significantly decreased the proportions of likely contaminants,  
183 while increasing the proportions of human-associated species and those detected in  
184 blood cultures ( $p < 0.005$ ; **Supplementary Figure 3**). These results collectively suggest  
185 that by using a set of contaminant-identification heuristics, our filters are sensitive and  
186 specific in retaining a higher proportion of biologically relevant taxa while removing likely  
187 contaminants.

188 **Blood microbial signatures from healthy individuals reflect sporadic translocation**  
189 **of DNA from commensals**

190 We next determined the fraction of distinct, healthy individuals for which microbes could  
191 be detected (i.e., prevalence). Notably, the most prevalent microbial species, *C. acnes*,  
192 was observed in 4.7% of individuals (**Figure 2a**), suggesting that none of the 117  
193 microbes can be considered ‘core’ species that are consistently detected across most  
194 healthy individuals. Additionally, we did not detect any microbial species in most (82%)  
195 of the samples after decontamination (**Figure 2b**), whereas the remaining 18% of  
196 samples had a median of only one microbial species per sample. This low number of  
197 species detected per sample was not due to insufficient sequencing depth since there  
198 was a weak negative correlation between the number of confidently detected species  
199 per sample and the microbial read depth (Spearman’s  $\rho=-0.232$ ,  $p<0.001$ ). Furthermore,  
200 some samples containing no microbial species had a microbial read count of up to ~2.1  
201 million (median=6,187 reads; distribution shown in **Supplementary Figure 4**). That is,  
202 even though a considerable number of reads were classified as microbial, they were all  
203 assigned to contaminant species. These results suggest that the presence of microbes  
204 in the blood of healthy and apparently asymptomatic individuals, as estimated by our  
205 detection methods, is infrequent and sporadic.

206 Given past reports of bacterial translocation from the mouth<sup>32</sup> or gut<sup>33</sup> into blood, we  
207 asked if the microbes we detected could have originated from various body sites. To do  
208 so, we assigned potential body site origins to the 117 microbial species detected in  
209 blood based on microbe-to-body-site mappings extracted from the Disbiome  
210 database<sup>34</sup>. We found that many ( $n=59$ ; 50%) of these confidently detected species are  
211 indeed human commensals that are present at various human body sites (**Figure 2c**).  
212 While some of these species may be contaminants that have survived our stringent  
213 decontamination filters, this observation, together with their low prevalence, suggests  
214 that the microbial DNA of many of these species may have transiently translocated from  
215 other locations in the body rather than being endogenous to blood. We further  
216 categorised the microbial species based on their growth environments (**Figure 2d**). A  
217 significant portion ( $n=42$ ; 36%) of the species were obligate anaerobes or obligate  
218 intracellular microbes, atypical of skin-associated microbes that may be introduced



219 during phlebotomy<sup>2</sup>, indicating that they are not likely to be sampling artefacts. All in all,  
220 the diverse origins of the microbes detected in blood, together with their low prevalence  
221 across a healthy population, is consistent with sporadic translocation of commensals, or  
222 their DNA, into the bloodstream.

223 Microbial presence in blood (i.e., bacteraemia) is typically associated with a range of  
224 clinical sequelae from mild fevers to sepsis. As such, we asked if the common microbes  
225 identified in patients with disease-associated bacteraemia are different from those  
226 detected in our cohorts of healthy individuals. To do so, we compared the prevalence of  
227 microbes detected in the sequenced blood samples against observations from 11 years  
228 of hospital blood culture records. The prevalence of microbial genera detected in the  
229 hospital blood culture records clearly differed from that in our sequenced blood  
230 samples, despite the overlap in detected taxa (**Figure 2e**). For example, while  
231 *Staphylococcus*, *Escherichia* and *Klebsiella* were the predominant genera identified in  
232 blood cultures, they were rarely detected in our blood sequencing libraries. We  
233 performed a similar comparison with a previous study<sup>35</sup> which sequenced blood  
234 microbial signatures in sepsis patients and found a similar difference in prevalence  
235 compared to our dataset (**Supplementary Figure 5**), confirming that our observations  
236 are not due to differences in the detection methods (sequencing vs. culture-based)  
237 used. If the species detected through sequencing were genuine, and represent  
238 microbial cells, these findings may be explained by the potentially higher virulence of  
239 pathogens detected in the clinic, which are more likely to cause clinical symptoms in  
240 individuals that would result in exclusion during our recruitment process. Conversely,  
241 under the same assumptions, our findings suggest that the microbes detected in the  
242 blood of healthy individuals are potentially better tolerated by the immune system (e.g.  
243 *Bifidobacterium* spp.<sup>36</sup> and *Faecalibacterium prausnitzii*<sup>37</sup> with immunomodulatory  
244 properties as gut commensals; **Figure 2a**).

#### 245 **Evidence for replicating microbial cells but without community structure or host** 246 **associations**

247 To better characterise the microbial DNA signatures detected in blood, we asked if they  
248 reflect the presence of viable microbial cells as opposed to circulating cell-free DNA.

249 This is because the former would allow for complex microbe-microbe or microbe-host  
250 interactions that would be of greater and more direct clinical relevance. In contrast to  
251 previous approaches that used microbial cultures<sup>3,38</sup>, we looked for more broad-based  
252 evidence of live bacterial growth in by applying replication rate analyses<sup>21,22</sup> on our  
253 sequenced blood samples. This approach is based on the principle that DNA  
254 sequencing of replicating bacteria would yield an increased read coverage (i.e., peak)  
255 nearer to the origin of replication (*Ori*) and decreased coverage (i.e., trough) nearer to  
256 the terminus (*Ter*)<sup>22</sup>. A coverage peak-to-trough ratio (PTR) greater than one is  
257 indicative of bacterial replication. Through this analysis, we found evidence for  
258 replication of 11 bacterial species out of the 20 that were sufficiently abundant to do this  
259 analysis (**Figure 3a**). The median-smoothed coverage plots of the replicating species all  
260 exhibited the sinusoidal coverage pattern (in black; **Figure 3b**) characteristic of  
261 replicating bacterial cells<sup>22</sup>. This contrasts with the even coverage patterns of three  
262 representative contaminants identified during the decontamination steps:  
263 *Achromobacter xylosoxidans*, *Pseudomonas mendocina* and *Alcaligenes faecalis*  
264 (**Figure 3c**). The *Ori* and *Ter* positions determined using coverage biases largely  
265 corresponded with an orthogonal method based on the GC-skew<sup>39</sup> of bacterial  
266 genomes, suggesting that the replication rate analyses are reliable. Additionally, all but  
267 one of these replicating species are present in hospital blood culture records and in  
268 previous reports of bacteraemia<sup>40-49</sup> (**Figure 3a**), indicating their ability to replicate in  
269 human blood. Overall, beyond the detection of microbial DNA, we present the first  
270 culture-independent molecular signatures for microbial replication from blood.

271 Given the presence of live bacteria, we investigated if the microbial species detected  
272 showed patterns of microbe-microbe interactions as would be expected from a microbial  
273 community. To do so, we computed pairwise *SparCC* correlations<sup>50</sup> between species,  
274 where positive and negative values indicate co-occurrence and mutual-exclusion,  
275 respectively. *SparCC* correlation is a reliable metric for assessing co-occurrence since it  
276 accounts for the sparse and compositional nature of microbial taxonomic profiles that  
277 confound standard correlation inference techniques<sup>50</sup>. We visualised *SparCC*  
278 correlations of the 117 microbial species confidently detected in blood sequencing  
279 libraries using network graphs, where each node is a species and each edge represents

280 the co-occurrence/exclusion associations between two species (**Figure 4a**). We could  
281 not detect strong community co-occurrence/exclusion patterns, with most associations  
282 being weak (SparCC correlation < 0.05), and only 19 pairwise associations exceeding a  
283 correlation value of 0.2, with four exceeding a value of 0.3 (**Figure 4a**). To determine if  
284 this result is a function of our stringent decontamination filters, we generated  
285 independent network graphs for the five adult cohorts before decontamination filtering  
286 and examined the co-occurrence/exclusion associations shared across cohorts. With an  
287 already lenient SparCC correlation threshold of 0.2, we identified no associations  
288 common to all the network graphs (**Figure 4b**), indicating that there were no consistent  
289 detectable microbial community associations in blood typical of microbiomes in various  
290 human body sites.

291 Previous studies have demonstrated the use of blood microbial DNA as a biomarker for  
292 disease, demonstrating associations with cancer<sup>30</sup>, type II diabetes<sup>51</sup> and periodontal  
293 disease<sup>52</sup>. In a similar vein, we investigated if the presence of microbes was associated  
294 with host phenotypes in our dataset. We first examined if microbes were detected more  
295 frequently in infants relative to adults. Given that the still-developing immune systems of  
296 infants puts them at greater risk of infection relative to healthy adults<sup>53</sup>, we reasoned  
297 that the prevalence of microbes in blood may differ within a birth cohort (GUSTO)  
298 relative to adult cohorts. Indeed, samples from GUSTO appeared to have a higher  
299 prevalence of microbes associated with most human body sites (**Supplementary**  
300 **Figure 6a**). This was in part, driven by genitourinary tract-associated microbes,  
301 *Fannyhessea vaginae*, *Lactobacillus jensenii*, *Lactobacillus crispatus*, *Lactobacillus*  
302 *iners*, and *Gardnerella vaginalis* (**Supplementary Figure 6b**). Similarly, we found  
303 enrichment of gut-associated bacteria such as *Bifidobacterium* spp. in GUSTO  
304 (**Supplementary Figure 6c**). These findings suggest that bacterial translocation may be  
305 more frequent in infants relative to adults, though differences in sample collection  
306 (umbilical cord *versus* venipuncture) could also explain them. A future study controlling  
307 for differences in sampling methods would be useful for further exploration of this  
308 observation.

309 Next, we systematically tested for pairwise associations between eight host phenotypes  
310 that were documented on the day of blood collection and the presence of each of the

311 117 microbial species detected in blood. These host phenotypes attributes were: sex,  
312 ancestry, age, body mass index (BMI), blood total cholesterol (TC), blood triglycerides  
313 (TG), systolic and diastolic blood pressure (SBP and DBP). Given the multiple large  
314 independent cohorts, we could perform statistical tests on each cohort separately, which  
315 allowed us to assess the consistency of identified association patterns across the  
316 different cohorts. Since these cohorts were sampled from a homogenous population,  
317 true association patterns are expected to be detected repeatedly regardless of cohort.  
318 Using this statistical testing approach, we found only five significant microbe-phenotype  
319 associations ( $p < 0.05$ ; **Supplementary Table 3**) after adjusting for multiple comparisons.  
320 Notably, all but one of the significant associations were present in only one cohort. The  
321 exception was *C. acnes*, which was significantly associated with ancestry in two  
322 cohorts. However, while *C. acnes* was more prevalent in individuals of Malay ancestry  
323 within the SEED cohort, it was more prevalent in Chinese individuals within the MEC  
324 cohort (**Supplementary Figure 7**). These cohort specific differences could be due to  
325 other demographic variables that were not recorded in this study, or perhaps from *C.*  
326 *acnes* subspecies differences. To ensure that we did not miss any associations due to  
327 the possible non-linearity of host-phenotype and microbial relationships, we also derived  
328 categorical phenotypes based on the recorded phenotypic information. These include  
329 being elderly (age  $\geq 65$ ), and other measures of ‘poorer health’, such as being obese  
330 (BMI  $> 30$ ), having high blood triglycerides (TG  $> 2.3$  mmol/L), high total cholesterol  
331 (TC  $\geq 6.3$  mmol/L), or high blood pressure (SBP  $\geq 130$  and DBP  $\geq 80$ ). We then tested  
332 for pairwise associations between these derived phenotypes and the presence of *any*  
333 bacteria but found no significant associations ( $p > 0.05$ ; **Supplementary Table 4**).  
334 Collectively, these results suggest no consistent associations between the presence of  
335 microbes in blood and the host phenotypes tested within a healthy population of  
336 individuals.

## 337 **Discussion**

338 We present the largest scale analysis, to date, of microbial signatures in human blood  
339 with rigorous accounting for computational and contamination artefacts and found no  
340 evidence for a common blood microbiome in a healthy population. Instead, we observed

341 mostly sporadic instances of blood harbouring DNA from single microbial species of  
342 diverse bodily origins, some of which might be actively replicating. Our findings hint at  
343 the possibility that the bloodstream represents a route for movement of microbes  
344 between different body sites in healthy individuals. However, the low prevalence of the  
345 detected species suggest that this movement is likely to be infrequent and transient.  
346 Unresolved questions remain about how interconnected the microbiomes at various  
347 body sites are, and whether these processes are altered during disease or throughout a  
348 person's lifetime. Can perturbations to the microbial community at one body site affect  
349 that at another site, and how does the host immune system asymptotically regulate  
350 microbial presence in blood? Our study lays the groundwork for future investigations  
351 into these questions, which may pave the way for a systemic understanding of the  
352 human microbiome across body sites in relation to human health and disease.

353 We employed a series of decontamination filters to differentiate microbial signatures in  
354 blood from artefactual signals associated with reagent and handling contamination, on  
355 the basis that the latter display strong batch-specific biases (**Supplementary Figure 2**;  
356 see **Methods**). Although our approach substantially improved the signal-to-noise ratio  
357 (**Fig. 1b-d**), it is still likely not fully effective in removing contaminants, evidenced from  
358 the fact that 10% of the 117 microbial species remaining after decontamination were still  
359 flagged as being of environmental or non-human origin (**Fig. 1b**, "likely contaminant").  
360 Hence, we recommend that any decontamination procedures should include further  
361 comparisons to various microbiome databases (**Fig. 1b-d**) to prioritise species for  
362 validation in future studies. For example, one might prioritise species that are not  
363 common contaminants, detected in blood cultures, and that are human associated  
364 (**Supplementary Table 2**) for follow-up experiments. Nevertheless, it is important to  
365 note that we could not detect a common blood microbiome despite the likely presence  
366 of residual contamination artefacts.

367 We observed signatures of replicating DNA from putatively genuine microbial species in  
368 blood by applying an existing PTR-based replication analysis approach. However, we  
369 cannot distinguish signals arising from replicating microbes in blood from those derived  
370 from microbial cells (intact or otherwise) which were recently replicating at other body  
371 sites before entering the bloodstream. Interestingly, while we could detect replication

372 signatures in blood associated with 11 out of 20 species with sufficient coverage across  
373 their genomes, we could not detect any amongst the 20 most prevalent contaminant  
374 species identified by our decontamination filters, including species from the genera  
375 *Alcaligenes*, *Caulobacter*, *Bradyrhizobium* and *Sphingomonas*, suggesting that the  
376 replication signatures detected in our dataset are not likely to be due to ‘kitome’  
377 contamination. Furthermore, this observation highlights the potential use of replication  
378 analyses for discriminating between putatively genuine taxa from ‘kitome’ contaminants  
379 in future metagenomic studies.

380 We found no core species in human blood on the basis of low prevalence across  
381 individuals in our population-level dataset. The prevalence estimates provided in this  
382 study are contingent on the sensitivity of detecting microbes through sequencing.  
383 Previous studies have shown that untargeted shotgun sequencing is highly sensitive for  
384 the detection of microbes in blood at a total sequencing depth of 20-30 million reads per  
385 sample<sup>35,54,55</sup>, perhaps even more so than culture-based methods<sup>56,57</sup>. In contrast, a  
386 median of 373 million reads was generated per sample for our sequencing libraries,  
387 suggesting that our methods do not lack sensitivity. Our prevalence estimates are also  
388 affected by the abundance thresholds used to determine whether a species is present in  
389 a single sample (i.e., abundance filter; **Figure 1a**). We defined these thresholds in terms  
390 of both absolute read count and relative abundance, which were determined based on  
391 simulation experiments (see **Methods**). Overly stringent abundance thresholds would  
392 lead to the erroneous masking of genuine signals, leading to an underestimation of  
393 microbial prevalence. However, even when relaxing the threshold to just a relative  
394 abundance of 0.001, none of the species, whether flagged as a contaminant or not, had  
395 more than 52% prevalence (**Supplementary Table 5**). Furthermore, the 20 most  
396 prevalent species at this threshold are all environmental microbes, and mostly comprise  
397 of *Sphingomonas* and *Bradyrhizobium* species, which are known to be common  
398 sequencing-associated contaminants<sup>19</sup>. This suggests that independent of our  
399 decontamination filters, none of the species detected qualify as core members.

400 In addition to not being able to detect any core species, we could not detect any strong  
401 co-occurrence or mutual exclusion associations between species regardless of whether  
402 our decontamination filters were applied. These associations generally reflect

403 cooperation or competition between species, respectively<sup>58</sup>. Indeed, within a microbial  
404 community, metabolic dependencies of species and the ability of different species to  
405 complement these dependencies have been shown to be a key driver of microbial co-  
406 occurrence<sup>59</sup>. On the other hand, competitive behaviours such as nutrient sequestration  
407 to deprive potential competitors of nutrients or producing adhesins to bind and occupy  
408 favourable sites in an environment<sup>60</sup> can lead to mutual exclusion between species. The  
409 fact that we could not detect any strong associations therefore points to the absence of  
410 an interacting microbial community in healthy humans. Of note, since our dataset was  
411 derived from circulating venous blood, we are, in principle, not able to detect microbial  
412 interactions that may be occurring at other sites of the bloodstream such as the inner  
413 endothelial lining of blood vessels. Experiments investigating the adherence of bacteria  
414 to blood vessel linings may provide further insight into this.

415 The availability of 11 years of blood culture records from the same country of origin as  
416 our blood samples enabled a reliable comparison of the prevalence of microbes in the  
417 healthy population and in the clinic. This is because the frequency of infections caused  
418 by different microbial species is known to differ from country to country<sup>61</sup>. Despite this,  
419 we expect that some of the variation in prevalence estimates may be due to the  
420 differences in detection methods. That said, previous studies have shown a strong  
421 concordance between culture and sequencing-based detection<sup>35,54,56,57</sup>, suggesting that  
422 the distinction between the prevalence of microbes found in healthy individuals and in  
423 the clinic is not due to the differences in detection methods. Our results support the  
424 conclusion that microbial presence in blood (i.e., bacteraemia) does not always lead to  
425 disease. These results are consistent with our other observation that microbial DNA  
426 detected in our cohorts of asymptomatic individuals tend to be from commensals, which  
427 may inherently be less virulent and better tolerated by the host compared to disease-  
428 causing pathogens. Indeed, the long-standing co-evolution of humans and colonizing  
429 microbes, places a selective pressure against high virulence phenotypes in these  
430 microbes to maintain host viability<sup>62</sup>. Simultaneously, there is a selective pressure for  
431 immunomodulatory phenotypes in commensals to improve their fitness, evidenced by  
432 the wealth of immunomodulatory activities found in the gut microbiome<sup>63</sup>. This agrees  
433 with previous findings that colonisation by commensals modulate early development of

434 the immune system<sup>64</sup>, which would allow a measured and regulated response against  
435 translocated commensals. By extension, the immunomodulatory properties of bacteria  
436 and their links to host tolerance to bacteraemia may be key factors in determining  
437 clinical outcomes. Perhaps, the presence (or lack) of these properties may determine  
438 whether an individual with bacteraemia is asymptomatic or septic. For example,  
439 abundant gut bacterial species such as *Bacteroides* spp. were not commonly detected  
440 in blood. Further exploration into the immunomodulatory activities of commensals vis-à-  
441 vis common blood culture pathogens may be the key to design therapeutics to manage  
442 or prevent the dysregulated host response that defines sepsis<sup>1</sup>.

443 We found no convincing associations between both measured (e.g. TC, SBP) and  
444 derived (e.g. obesity) host phenotypes with microbial presence that were consistent  
445 across the different cohorts. This suggests that the risk of transient microbial  
446 translocation, at least across our cohorts of healthy adults, is fairly consistent. In  
447 contrast, this risk may increase in individuals with more severe disease. In fact, variable  
448 microbial DNA profiles in blood have been used to delineate health and disease states.  
449 This has most prominently been shown for sepsis<sup>35,54–57,65</sup>, where the presence of viable  
450 microbes is expected, but also for cancer<sup>30</sup>, periodontal disease<sup>52</sup>, and chronic kidney  
451 disease<sup>66</sup>, which are unrelated to bloodstream infections. These studies highlight the  
452 promise of metagenomic sequencing of blood for developing diagnostic, prognostic, or  
453 therapeutic tools. Our characterisation of the species breadth in healthy individuals  
454 forms a crucial baseline for comparison with that in diseased individuals. Indeed, our  
455 findings open new doors to understanding why and how blood microbial profiles  
456 correlate with health status. One possible hypothesis is that mucosal integrity is  
457 compromised in a disease state, leading to higher translocation rates of microbes into  
458 the bloodstream. This is consistent with findings of increased intestinal permeability (i.e.,  
459 'leaky gut') in disease or even during physiological stress<sup>67</sup>. Future studies testing this  
460 hypothesis may consider a focus on the gut-associated bacteria that were detected in  
461 our study (e.g. *Bifidobacterium adolescentis*, *Faecalibacterium prausnitzii*). Further  
462 experimental investigations into the mechanisms of microbial translocation and the  
463 modulatory effects of the microbiomes present at other body sites may shed light on the  
464 relationship between microbial presence in blood and health status.



465 If we take the definition of a ‘microbiome’ as a microbial community whose member  
466 species interact amongst themselves and with their ecological niche<sup>9</sup>, our findings lead  
467 to the conclusion that there is no consistent circulating blood microbiome in healthy  
468 individuals. Sporadic and transient translocation of commensals from other body sites  
469 into the bloodstream (**Figure 5**) is the more parsimonious explanation for the  
470 observation that most of the microbes detected are commensals from other body sites.  
471 Furthermore, the relatively low prevalence of microbes in blood suggests rapid  
472 clearance of translocated microbes rather than prolonged colonisation in blood. Based  
473 on these findings, we advocate against the use of the term ‘blood microbiome’ or  
474 ‘circulating microbiome’, which are potentially misleading, when referring to the  
475 detection of microbial DNA or of microbial cells in blood due to transient translocation  
476 events.

## 477 **Methods**

### 478 *Datasets*

479 Our sequencing dataset, also known as the SG10K\_Health dataset  
480 (<https://www.npm.sg/collaborate/partners/sg10k/>), comprises of shotgun sequencing  
481 libraries of DNA extracted from the whole blood or umbilical cord blood of 9,770 healthy  
482 Singaporean individuals<sup>68</sup> who were recruited as part of six independent cohorts.  
483 Individuals were deemed to be healthy if they do not have any personal history of major  
484 disorders such as stroke, cardiovascular diseases, cancer, diabetes and renal failure.  
485 Oral health information was not collected and therefore not part of the exclusion criteria.  
486 Whole blood for sequencing was collected via venipuncture only from the five adult  
487 cohorts (median age=49; interquartile range=16): Health for Life in Singapore (HELIOS;  
488  $n=2,286$ ), SingHealth Duke-NUS Institute of Precision Medicine (PRISM,  $n=1,257$ ), Tan  
489 Tock Seng Hospital Personalised Medicine Normal Controls (TTSH,  $n=920$ ), Singapore  
490 Epidemiology of Eye Diseases (SEED,  $n=1,436$ )<sup>69,70</sup>, and the Multi-Ethnic Cohort (MEC,  
491  $n=2,902$ )<sup>71</sup>. Additionally, cord blood was collected only for the birth cohort Growing Up  
492 in Singapore Towards healthy Outcomes (GUSTO;  $n=969$ )<sup>72</sup>. Measurement of host  
493 phenotypes was performed on the day of blood collection, except for the GUSTO cohort  
494 where measurements were taken at a later timepoint when the children were at a  
495 median age of 6.1 (interquartile range=0.1). Using nearest neighbor approaches to  
496 reference genotypes<sup>73</sup>, individuals were broadly categorised into four ethnic categories  
497 representing distinct genetic ancestries: Chinese (59%), Malays (19%), Indians (21%)  
498 and Others (1%). All individuals were deemed healthy at the point of recruitment if they  
499 did not include any self-reported diseases in the recruitment questionnaires. All cohort  
500 studies were approved by relevant institutional ethics review boards. A summary of the  
501 cohort demographics and the ethics review approval reference numbers are provided in  
502 **Supplementary Table 1.**

503 Additionally, we retrieved anonymised blood culture records from Singapore General  
504 Hospital, the largest tertiary hospital in Singapore. These records span the years 2011-  
505 2021 and include aerobic, anaerobic and fungal blood cultures taken from 282,576  
506 unique patients. These blood cultures were ordered as part of routine clinical

507 management, that is, when clinically indicated for the investigation of bacteremia or  
508 fungemia. Blood cultures were performed and analysed as per hospital standard  
509 operating procedures. In brief, blood samples were collected aseptically and inoculated  
510 into BD™ BACTEC™ bottles at the bedside (BD™ BACTEC™ Plus Aerobic/F Culture  
511 vials Plastic [catalogue number 442023] for aerobic blood culture, BD™ BACTEC™  
512 Plus Anaerobic/F Culture vials Plastic [catalogue number 442022] for anaerobic blood  
513 culture and Myco/F Lytic [catalogue number 42288] for fungal blood culture). The  
514 inoculated bottles were transported to the diagnostic laboratory at ambient temperature  
515 and incubated in the BD™ BACTEC™ FX Blood Culture System on arrival. Aerobic and  
516 anaerobic blood culture bottles were incubated for a maximum of five days, and fungal  
517 blood culture bottles were incubated for a maximum of 28 days. Blood culture bottles  
518 that were flagged positive by the BD™ BACTEC™ FX Blood Culture System were  
519 inoculated onto solid media, and the resultant colonies were identified using a  
520 combination of biochemical tests and matrix assisted laser desorption ionization-time of  
521 flight mass spectrometry (MALDI-TOF MS) (Bruker® microflex LRF).

#### 522 *Sample preparation and batch metadata*

523 DNA from whole blood was extracted using one of six different DNA extraction kits.  
524 Paired-end 151bp sequencing with an insert size of 350bp was performed up to 15-fold  
525 or 30-fold coverage of the human genome. Library preparation was performed using  
526 one of three library preparation kits. Sequencing was performed on the Illumina HiSeq X  
527 platform with HiSeq PE Cluster Kits and HiSeq SBS Kits. The type of extraction kits and  
528 library preparation kits used, and lot numbers for the SBS Kits, PE Cluster Kits, and  
529 sequencing flow cells used are provided as batch metadata. All reagent kits used, the  
530 number of batches and the number of samples processed per batch are provided in  
531 **Supplementary Table 6.**

#### 532 *Data pre-processing and quality control*

533 The bioinformatic processing steps applied to the sequencing libraries are summarised  
534 in **Figure 1a**. Read alignment of sequencing reads to the GRCh38 human reference  
535 genome was already performed as part of a separate study<sup>68</sup> using *BWA-MEM*  
536 *v0.7.17*<sup>74</sup>. We retrieved read pairs where both members of the pair did not map to the

537 human genome. Following which, we performed quality control of the sequencing reads.  
538 We trimmed low quality bases at the ends of reads with quality <Q10 (base quality  
539 trimming) and discarded reads with average read quality less than Q10 (read quality  
540 filter). We also discarded low complexity sequences with an average entropy less than  
541 0.6, with a sliding window of 50 and k-mer length of five (low complexity read filter). All  
542 basic quality control steps were performed using *bbduk* from the *BBTools suite* v37.62  
543 ([sourceforge.net/projects/bbmap/](https://sourceforge.net/projects/bbmap/)).

#### 544 *Taxonomic classification of blood sequencing libraries*

545 Taxonomic classification of non-human reads was done using *Kraken2* v2.1.2<sup>23</sup> with the  
546 ‘—paired’ flag. We used the *PlusPF* database (17<sup>th</sup> May 2021 release) maintained by  
547 Ben Langmead ([https://genome-  
548 idx.s3.amazonaws.com/kraken/k2\\_pluspf\\_20210517.tar.gz](https://genome-idx.s3.amazonaws.com/kraken/k2_pluspf_20210517.tar.gz)), which includes archaeal,  
549 bacterial, viral, protozoan, and fungal references. Of all non-human read pairs, 72%  
550 were classified as microbial at the species level, yielding 8,890 species. Samples with  
551 less than 100 microbial read pairs were removed, resulting in a final dataset comprising  
552 8,892 samples, with a median microbial read-pair count of 6187.

553 To minimise noise in the taxonomic assignments, we defined a set of abundance  
554 thresholds whereby species with abundance values less than or equal to these  
555 thresholds (i.e., relative abundance $\leq$ 0.005, read pairs assigned $\leq$ 10) were counted as  
556 absent (set to zero read counts). We performed simulations to systematically determine  
557 a relative abundance threshold that minimizes false positive species assignments.  
558 Sequencing reads were simulated using *InSilicoSeq* v1.5.4<sup>75</sup> with error models trained  
559 on the SG10K\_Health sequencing libraries and processed using the same bioinformatic  
560 steps as per the SG10K\_Health dataset to obtain microbial taxonomic profiles. We  
561 simulated 373 million reads equivalent to the median library read count of all samples,  
562 comprising reads from the GRCh38 human reference and ten microbial genomes  
563 (*Yersinia enterocolitica*, *Leclercia adecarboxylata*, *Moraxella osloensis*, *Streptococcus*  
564 *pneumoniae*, *Pasteurella multocida*, *Staphylococcus epidermidis*, *Actinomyces*  
565 *viscosus*, *Torque teno virus*, *Human betaherpesvirus 6A*, *Candida albicans*) at various  
566 proportions. Due to read misclassification, some of the simulated reads were

567 erroneously assigned to another species and produced false positives. A final relative  
568 abundance threshold of 0.005 that delineated these false positive assignments from  
569 true positives was selected (**Supplementary Figure 8**). Following the application of  
570 these thresholds, the relative abundance distribution of microbial taxa classified as  
571 present were distinct from the distribution for those classified as absent  
572 (**Supplementary Figure 9**). Furthermore, the distribution of abundances for microbe-  
573 negative samples is centred around a relative abundance of 0.0001, i.e. at least tenfold  
574 below the typical relative abundance thresholds used to determine if a taxon is present  
575 or absent (0.001-0.045<sup>14</sup>). Relative abundances were calculated by dividing the  
576 microbial read count in a sample by the total number of microbial reads assigned to that  
577 sample.

#### 578 *Decontamination filters*

579 After application of the presence/absence filter, we identified and removed putative  
580 contaminants using established decontamination heuristics<sup>26</sup> that have been validated  
581 in previous studies<sup>27,28</sup>, prior to our downstream analyses. These rules were applied  
582 using eight types of batch information: source cohort, DNA extraction kit type, library  
583 preparation kit type, and lot numbers for sequencing-by-synthesis kit (box 1, box 2),  
584 paired-end cluster kit (box 1, box 2) and sequencing flow cell used. Other batch  
585 information such as the pipettes and consumables used, or storage location and  
586 duration were not recorded and could potentially contribute to some level of batch-  
587 specific contamination. However, these batches are expected to be correlated with the  
588 other types of batch information available, and so the resultant contaminants could in  
589 theory be accounted for using our filters. We describe the four decontamination filters  
590 used, as shown in **Figure 1a**, in sequential order:

591 (1) *Prevalence filter*. A microbial species is considered a contaminant specific to a  
592 batch if it is present at greater than 25% prevalence in that batch and has greater  
593 than a two-fold higher prevalence than that for any other batch. Batches with less  
594 than 100 samples were excluded from this analysis. This filter is based on the  
595 principle that species which are highly prevalent in some batches but lowly

596 prevalent or absent in others are likely contaminants<sup>26</sup>. We illustrate this for an  
597 example species in **Supplementary Figure 10a**.

598 (2) *Correlation filter*. A microbial species is considered a contaminant if it is highly  
599 correlated (Spearman's  $\rho > 0.7$ ) with any contaminant within the same batch, as  
600 identified by the prevalence filter. This filter is based on the principle that  
601 contaminants are highly correlated within the same batch<sup>26</sup>. Spearman's  $\rho$  was  
602 calculated using centred log-ratio (CLR) transformed<sup>76</sup> microbial relative  
603 abundances. CLR transformations and Spearman's  $\rho$  were calculated using the  
604 *clr* function as part of the *compositions* package<sup>77</sup> and *cor.test* function in *R*. We  
605 illustrate this within-batch correlation for an example species in **Supplementary**  
606 **Figure 10b**.

607 (3) *Batch filter*. A non-contaminant microbial species must be detected in samples  
608 processed by at least two reagent kit batches or reagent types. That is, any  
609 species that is only detected in a single batch for any of the reagent kits used  
610 (**Supplementary Table 6**) are considered contaminants. This filter is based on  
611 the principle that species that can be repeatedly observed across different  
612 reagent batches are more likely to reflect genuine non-contaminant signals<sup>26</sup>.  
613 Library preparation kit type was excluded from this analysis since only three kit  
614 types were used, with 86% of samples processed using one of the kits.

615 (4) *Read count filter*. A microbial species is considered a sequencing or analysis  
616 artefact if it is not assigned at least 100 reads in at least one sample. This filter is  
617 based on the principle that species that are always assigned a low number of  
618 read pairs, never exceeding the background noise within sequencing libraries,  
619 are more likely to be artefactual rather than genuine signals. An example of an  
620 artefactual species is *Candidatus Nitrosocosmicus franklandus*, which was  
621 assigned at most 22 read pairs by *Kraken2* across 21 sequenced samples.

622 To demonstrate the effectiveness of our decontamination filters, we additionally tested  
623 our results against the null hypothesis that the 117 microbial species retained after  
624 decontamination produced the same proportions of species classified as likely  
625 contaminants, human-associated, or that were detected in blood culture compared to if

626 we picked these species at random. In this analysis, we generated 1000 sets of 117  
627 microbial species that were randomly selected from the list of species before  
628 decontamination and compared the species to the three databases as per **Figure 1b-d**.  
629 P-values were calculated by taking the proportion of random iterations that generated  
630 proportions of species classified as likely contaminants, detected in blood, or human-  
631 associated that were as extreme or more extreme than those observed for the 117  
632 species retained by our decontamination filters.

### 633 *Characterisation of microbial species*

634 We classified microbial species as human-associated or not based on a published host-  
635 pathogen association database<sup>78</sup>. In this database, host-pathogen associations are  
636 defined by the presence of at least one documented infection of the host by the  
637 pathogen<sup>31</sup>. For species that were not found in this database, we performed a  
638 systematic PubMed search using the search terms: (microbial species name) AND  
639 (human) AND ((infection) OR (commensal)). Similarly, species that had at least one  
640 published report of human colonisation/infection were considered human-associated.  
641 Additionally, we classified the potential body site origins for each microbial species  
642 using the *Disbiome* database, which collects data and metadata of published  
643 microbiome studies in a standardised way<sup>34</sup>. We extracted the information for all  
644 microbiome experiments in the database using the URL:  
645 '<https://disbiome.ugent.be:8080/experiment>' (accessed 26<sup>th</sup> April 2022). We first  
646 extracted microbe-to-sample type mappings from this information (e.g. *C. acnes*→skin  
647 swab). We then manually classified each sample type into different body sites (e.g. skin  
648 swab→skin). This allowed us to generate microbe-to-body site mappings. Sample types  
649 with ambiguous body site origins (e.g. abscess pus) were excluded. The range of  
650 sample types within the Disbiome database used to derive the microbe-body-site  
651 mappings are provided in **Supplementary Table 7**. Finally, we classified microbial  
652 species based on their growth requirements, with reference to a clinical microbiology  
653 textbook<sup>79</sup>. Viruses were classified as obligate intracellular. The microbiological  
654 classifications for each species are provided in **Supplementary Table 2**.

### 655 *Estimating coverage breadth and bacterial replication rates*

656 We performed read alignment of sequencing libraries to microbial reference genomes  
657 using *Bowtie v2.4.5*<sup>80</sup> with default parameters. In total, we used references for 28 of the  
658 117 microbial species detected in blood, comprising all bacterial species with at least  
659 1000 Kraken2-assigned read pairs in a single sample and all viral species ( $n=5$ ). For  
660 each species, we aligned the microbial reads of five sample libraries with the most  
661 reads assigned to that species, to the reference genome of that species. For each  
662 sample and microbial genome, the genome coverage per position was computed using  
663 the *pileup* function as part of the *Rsamtools v2.8.0* package<sup>81</sup> in *R*. In principle,  
664 recovery of a larger fraction of a microbial genome provides a higher confidence that it  
665 is truly present in a sample<sup>24,25</sup>. We could recover at least 10% of the microbial  
666 genomes for 27/28 (96%) of the species. Since it is difficult to assess coverage breadth  
667 for a species covered by a low number of reads, we only performed this analysis on all  
668 viruses ( $n=5$ ), and all bacterial species with at least 1000 Kraken2-assigned read pairs  
669 ( $n=23$ ), which corresponds to ~10% coverage over a typical 3Mbp bacterial genome  
670 (assuming non-overlapping reads). For the replication rate analyses, PTR values were  
671 calculated using the *bPTR* function in *iRep v1.1.0*<sup>21</sup>, which is based on the method  
672 proposed by Korem et al.<sup>22</sup>. The *Ori* and *Ter* positions were determined based on the  
673 coverage peaks and troughs (in red and blue, respectively; **Figure 3**). *Ori* and *Ter*  
674 positions were also calculated using a cumulative GC-skew line, which is expected to  
675 be in anti-phase with the sinusoidal coverage pattern across the genome<sup>39</sup> (in green;  
676 **Figure 3**).

### 677 *Microbial networks*

678 Microbial co-occurrence/mutual exclusion associations were computed using the  
679 *SparCC* algorithm<sup>50</sup>, implemented in the *SpiecEasi v1.1.2* package<sup>82</sup> in *R* and the  
680 microbial networks were visualized using *Igraph v1.2.9*<sup>83</sup>. We excluded the birth cohort  
681 GUSTO since it is of a different demographic that may possess a distinct set of  
682 microbial associations.



### 683 *Detecting associations between microbial taxonomic profiles and host phenotypes*

684 We tested for microbe-host phenotype associations within individual cohorts separately.  
685 For the two categorical host phenotypes, genetic sex and ancestry, we tested for  
686 differences in the prevalence of each microbial species between the different categories  
687 using a two-sided Fisher's exact test (*fisher.test* function in *R*). For the continuous  
688 variables (age, BMI, TC, TG, SBP and DBP) we used a two-sided Mann-Whitney U test  
689 (*wilcox.test* function in *R*) to test for differences in the distributions of the variables when  
690 a species was present or absent. Benjamini-Hochberg multiple-testing correction was  
691 applied only after consolidating the *p*-values from both tests and for all cohorts using the  
692 *p.adjust* function in *R*. Statistical tests were only performed if a species was present in  
693 at least 50 samples in total. Separately, for derived phenotypes (i.e., being elderly or  
694 measures of 'poorer health'), we used the Fisher's exact test before applying Benjamini-  
695 Hochberg multiple-testing correction. In all cases, samples with missing host  
696 phenotypes were excluded.

### 697 *Data analysis and visualisation*

698 All data analyses were performed using *R* v4.1.0 or using *Python* v3.9.12. Visualisations  
699 were performed using *ggplot* v3.3.5<sup>84</sup>. **Figure 5** was created using BioRender.com  
700 under an academic subscription.

### 701 **Data availability**

702 Requests for the sequencing data used in this study should be made through the  
703 National

704 Precision Medicine (NPM) Programme Data Access Committee ([contact\\_npco@gis.a-](mailto:contact_npco@gis.a-star.edu.sg)  
705 [star.edu.sg](mailto:contact_npco@gis.a-star.edu.sg)). All other data used in our analyses are hosted on Zenodo  
706 (<https://doi.org/10.5281/zenodo.7368262>). The accession numbers for all genome  
707 references used are provided in **Supplementary Table 8**.

### 708 **Code availability**

709 All custom code used to perform the analyses reported here are hosted on GitHub  
710 ([https://github.com/cednotsed/blood\\_microbial\\_signatures.git](https://github.com/cednotsed/blood_microbial_signatures.git)).

## 711 **Acknowledgements**

712 We would like to thank the SG10K\_Health Consortium, whose members and affiliations  
713 are listed in **Supplementary Table 9**, for the collection and curation of the data used in  
714 this study. The computational work for this article was partially performed on resources  
715 of the National Supercomputing Centre, Singapore (<https://www.nscg.sg>). This study  
716 made use of data generated as part of the Singapore National Precision Medicine  
717 program funded by a grant from the Industry Alignment Fund (Pre-Positioning) (IAF-PP:  
718 H17/01/a0/007).

719 This study made use of data / samples collected in the following cohorts in Singapore:

720 (1) The Health for Life in Singapore (HELIOS) study at the Lee Kong Chian School of  
721 Medicine, Nanyang Technological University, Singapore (supported by grants from a  
722 Strategic Initiative at Lee Kong Chian School of Medicine, the Singapore Ministry of  
723 Health (MOH) under its Singapore Translational Research Investigator Award  
724 (NMRC/STaR/0028/2017) and the IAF-PP: H18/01/a0/016);

725 (2) The Growing up in Singapore Towards Healthy Outcomes (GUSTO) study, which is  
726 jointly hosted by the National University Hospital (NUH), KK Women's and Children's  
727 Hospital (KKH), the National University of Singapore (NUS) and the Singapore  
728 Institute for Clinical Sciences (SICS), Agency for Science Technology and Research  
729 (A\*STAR) (supported by the Singapore National Research Foundation under its  
730 Translational and Clinical Research (TCR) Flagship Programme and administered  
731 by the Singapore Ministry of Health's National Medical Research Council (NMRC),  
732 Singapore - NMRC/TCR/004-NUS/2008; NMRC/TCR/012-NUHS/2014. Additional  
733 funding was provided by SICS and IAF-PP H17/01/a0/005);

734 (3) The Singapore Epidemiology of Eye Diseases (SEED) cohort at Singapore Eye  
735 Research Institute (SERI) (supported by NMRC/CIRG/1417/2015;  
736 NMRC/CIRG/1488/2018; NMRC/OFLCG/004/2018);

737 (4) The Multi-Ethnic Cohort (MEC) cohort (supported by NMRC grant 0838/2004; BMRC  
738 grant 03/1/27/18/216; 05/1/21/19/425; 11/1/21/19/678, Ministry of Health, Singapore,  
739 National University of Singapore and National University Health System, Singapore);

740 (5) The SingHealth Duke-NUS Institute of Precision Medicine (PRISM) cohort  
741 (supported by NMRC/CG/M006/2017\_NHCS; NMRC/STaR/0011/2012,  
742 NMRC/STaR/ 0026/2015, Lee Foundation and Tanoto Foundation);

743 (6) The TTSH Personalised Medicine Normal Controls (TTSH) cohort (supported by  
744 NMRC/CG12AUG17 and CGAug16M012).

745 The views expressed are those of the authors, are not necessarily those of the National  
746 Precision Medicine investigators, or institutional partners. We thank all investigators,  
747 staff members and study participants who made the National Precision Medicine Project  
748 possible.

#### 749 **Ethics declaration**

750 All individuals in the participating cohorts were recruited with signed informed consent  
751 from the participating individual or parent/guardian in the case of minors. All studies  
752 were approved by relevant institutional ethics review boards detailed in **Supplementary**  
753 **Table 1**.

## 754 **Figure legends**

755 **Figure 1: Decontamination results.** (a) Summary of pre-processing steps and filters  
756 applied to taxonomic profiles ( $n=9,770$  individuals) and the number of species retained  
757 after each filter. Pie charts showing the proportion of microbial species that are (b)  
758 human-associated, (c) common sequencing contaminants, and (d) detected in blood  
759 culture records, before and after applying the decontamination filters.

760 **Figure 2: Microbial signatures in human blood from healthy individuals.** (a) Bar  
761 chart showing the prevalence of the top 50 confidently detected microbial species in all  
762 8,892 blood sequencing libraries. (b) Histogram of the number of microbial species per  
763 sample. (c) Bar chart of the human body sites that the 117 confidently detected species  
764 are associated with, as determined using the Disbiome database<sup>34</sup>. Species are  
765 classified as 'multiple' if they are associated with more than one body site and classified  
766 otherwise if they are only associated with a single body site. (d) Piechart showing the  
767 microbiological classification of the 117 confidently detected species. (e) Bar chart  
768 showing prevalence of genera in blood culture records and in the blood sequencing  
769 libraries before and after decontamination.

770 **Figure 3: Evidence for replicating bacteria in blood samples from healthy**  
771 **individuals.** (a) Summary statistics for samples where bacterial species were deemed  
772 to be replicating using *iRep*<sup>21</sup> (i.e., peak-to-trough ratio (PTR) $>1$ ). The number of reads  
773 assigned to the species by *Kraken2*<sup>23</sup>, the possible body sites the species are  
774 associated with, whether they were previously reported in published studies of  
775 bacteraemia, the overall prevalence of the species across all 8,892 individuals in our  
776 study and the calculated PTR values, are indicated. Coverage plots of (b) three  
777 representative confidently detected species and (c) three representative contaminant  
778 species, showing the expected patterns of *Ori* to *Ter* coverage skew only where  
779 expected i.e. confidently detected species.

780 **Figure 4: Microbial co-occurrence networks.** (a) *SparCC*<sup>50</sup> co-occurrence networks  
781 computed from all samples with at least two microbial species following  
782 decontamination at different *SparCC* correlation thresholds (0.05, 0.2, 0.3). Only  
783 associations with a magnitude of *SparCC* correlation greater than the respective

784 thresholds are retained. (b) *SparCC* networks for individual cohorts at a correlation  
785 threshold of 0.2. No co-occurrence associations were retained after taking the  
786 intersection of edges between all cohort networks. For (a) and (b), each node  
787 represents a single microbial species, and each edge a single association between a  
788 pair of microbial species. Edge thickness is scaled by the magnitude of correlation. The  
789 number of samples used to compute each network and the correlation thresholds used  
790 are annotated. Positive and negative *SparCC* correlations are indicated in green and  
791 blue respectively.

792 **Figure 5: Potential models for microbes in blood.** Our findings suggest that there is  
793 no consistent circulating blood microbiome (i.e., the blood microbiome model). The  
794 more likely model is where microbes from other body sites transiently and sporadically  
795 translocate into blood. Created with BioRender.com under an academic subscription.

## 796 References

- 797 1. Singer, M. *et al.* The third international consensus definitions for sepsis and septic shock  
798 (Sepsis-3). *Jama* **315**, 801–810 (2016).
- 799 2. Brecher, M. E. & Hay, S. N. Bacterial contamination of blood components. *Clin.*  
800 *Microbiol. Rev.* **18**, 195–204 (2005).
- 801 3. Damgaard, C. *et al.* Viable bacteria associated with red blood cells and plasma in freshly  
802 drawn blood donations. *PLoS One* **10**, e0120826 (2015).
- 803 4. Schierwagen, R. *et al.* Circulating microbiome in blood of different circulatory  
804 compartments. *Gut* **68**, 578–580 (2019).
- 805 5. Païssé, S. *et al.* Comprehensive description of blood microbiome from healthy donors  
806 assessed by 16 S targeted metagenomic sequencing. *Transfusion (Paris)* **56**, 1138–1147 (2016).
- 807 6. Whittle, E., Leonard, M. O., Harrison, R., Gant, T. W. & Tonge, D. P. Multi-method  
808 characterization of the human circulating microbiome. *Front. Microbiol.* 3266 (2019).
- 809 7. D’Aquila, P. *et al.* Microbiome in Blood Samples From the General Population Recruited  
810 in the MARK-AGE Project: A Pilot Study. *Front. Microbiol.* 2055 (2021).
- 811 8. Castillo, D. J., Rifkin, R. F., Cowan, D. A. & Potgieter, M. The healthy human blood  
812 microbiome: Fact or fiction? *Front. Cell. Infect. Microbiol.* **9**, 148 (2019).
- 813 9. Berg, G. *et al.* Microbiome definition re-visited: old concepts and new challenges.  
814 *Microbiome* **8**, 1–22 (2020).
- 815 10. Faust, K. *et al.* Microbial co-occurrence relationships in the human microbiome. *PLoS*  
816 *Comput. Biol.* **8**, (2012).
- 817 11. Das, P., Ji, B., Kovatcheva-Datchary, P., Bäckhed, F. & Nielsen, J. In vitro co-cultures of  
818 human gut bacterial species as predicted from co-occurrence network analysis. *PLoS One* **13**,  
819 e0195161 (2018).
- 820 12. Relvas, M. *et al.* Relationship between dental and periodontal health status and the  
821 salivary microbiome: bacterial diversity, co-occurrence networks and predictive models. *Sci.*  
822 *Rep.* **11**, 1–22 (2021).
- 823 13. Risely, A. Applying the core microbiome to understand host–microbe systems. *J. Anim.*  
824 *Ecol.* **89**, 1549–1558 (2020).
- 825 14. Neu, A. T., Allen, E. E. & Roy, K. Defining and quantifying the core microbiome:  
826 Challenges and prospects. *Proc. Natl. Acad. Sci.* **118**, e2104429118 (2021).
- 827 15. Consortium, H. M. P. Structure, function and diversity of the healthy human microbiome.  
828 *nature* **486**, 207 (2012).
- 829 16. Johnson, J. S. *et al.* Evaluation of 16S rRNA gene sequencing for species and strain-level  
830 microbiome analysis. *Nat. Commun.* **10**, 5029 (2019).
- 831 17. Glassing, A., Dowd, S. E., Galandiuk, S., Davis, B. & Chiodini, R. J. Inherent bacterial  
832 DNA contamination of extraction and sequencing reagents may affect interpretation of  
833 microbiota in low bacterial biomass samples. *Gut Pathog.* **8**, 24 (2016).
- 834 18. Hornung, B. V. H., Zwittink, R. D. & Kuijper, E. J. Issues and current standards of  
835 controls in microbiome research. *FEMS Microbiol. Ecol.* **95**, fiz045 (2019).
- 836 19. Salter, S. J. *et al.* Reagent and laboratory contamination can critically impact sequence-  
837 based microbiome analyses. *BMC Biol.* **12**, 87 (2014).
- 838 20. Doern, G. V *et al.* A comprehensive update on the problem of blood culture  
839 contamination and a discussion of methods for addressing the problem. *Clin Microbiol Rev* **33**,  
840 e00009-19 (2019).

- 841 21. Brown, C. T., Olm, M. R., Thomas, B. C. & Banfield, J. F. Measurement of bacterial  
842 replication rates in microbial communities. *Nat. Biotechnol.* **34**, 1256–1263 (2016).
- 843 22. Korem, T. *et al.* Growth dynamics of gut microbiota in health and disease inferred from  
844 single metagenomic samples. *Science* **349**, 1101–1106 (2015).
- 845 23. Wood, D. E., Lu, J. & Langmead, B. Improved metagenomic analysis with Kraken 2.  
846 *Genome Biol.* **20**, 257 (2019).
- 847 24. Hillmann, B. *et al.* SHOGUN: a modular, accurate and scalable framework for  
848 microbiome quantification. *Bioinformatics* **36**, 4088–4090 (2020).
- 849 25. Al-Ghalith, G. & Knights, D. BURST enables mathematically optimal short-read  
850 alignment for big data. *bioRxiv* 2020.09.08.287128 (2020) doi:10.1101/2020.09.08.287128.
- 851 26. de Goffau, M. C. *et al.* Recognizing the reagent microbiome. *Nat. Microbiol.* **3**, 851–853  
852 (2018).
- 853 27. Chia, M. *et al.* Shared signatures and divergence in skin microbiomes of children with  
854 atopic dermatitis and their caregivers. *J. Allergy Clin. Immunol.* (2022)  
855 doi:<https://doi.org/10.1016/j.jaci.2022.01.031>.
- 856 28. Chng, K. R. *et al.* Cartography of opportunistic pathogens and antibiotic resistance genes  
857 in a tertiary hospital environment. *Nat. Med.* **26**, 941–951 (2020).
- 858 29. de Goffau, M. C. *et al.* Human placenta has no microbiome but can contain potential  
859 pathogens. *Nature* **572**, 329–334 (2019).
- 860 30. Poore, G. D. *et al.* Microbiome analyses of blood and tissues suggest cancer diagnostic  
861 approach. *Nature* **579**, 567–574 (2020).
- 862 31. Shaw, L. P. *et al.* The phylogenetic range of bacterial and viral pathogens of vertebrates.  
863 *Mol. Ecol.* **29**, 3361–3379 (2020).
- 864 32. Tomás, I., Diz, P., Tobías, A., Scully, C. & Donos, N. Periodontal health status and  
865 bacteraemia from daily oral activities: systematic review/meta-analysis. *J. Clin. Periodontol.*  
866 **39**, 213–228 (2012).
- 867 33. Wells, C. L., Maddaus, M. A. & Simmons, R. L. Proposed mechanisms for the  
868 translocation of intestinal bacteria. *Rev. Infect. Dis.* **10**, 958–979 (1988).
- 869 34. Janssens, Y. *et al.* Disbiome database: linking the microbiome to disease. *BMC*  
870 *Microbiol.* **18**, 50 (2018).
- 871 35. Blauwkamp, T. A. *et al.* Analytical and clinical validation of a microbial cell-free DNA  
872 sequencing test for infectious disease. *Nat. Microbiol.* **4**, 663–674 (2019).
- 873 36. Ruiz, L., Delgado, S., Ruas-Madiedo, P., Sánchez, B. & Margolles, A. Bifidobacteria and  
874 their molecular communication with the immune system. *Front. Microbiol.* **8**, 2345 (2017).
- 875 37. Sokol, H. *et al.* Faecalibacterium prausnitzii is an anti-inflammatory commensal  
876 bacterium identified by gut microbiota analysis of Crohn disease patients. *Proc. Natl. Acad. Sci.*  
877 **105**, 16731–16736 (2008).
- 878 38. Domingue, G. J. & Schlegel, J. U. Novel bacterial structures in human blood: cultural  
879 isolation. *Infect. Immun.* **15**, 621–627 (1977).
- 880 39. Lobry, J. R. Asymmetric substitution patterns in the two DNA strands of bacteria. *Mol.*  
881 *Biol. Evol.* **13**, 660–665 (1996).
- 882 40. Yang, C.-C. *et al.* Characteristics and outcomes of Fusobacterium nucleatum  
883 bacteremia—a 6-year experience at a tertiary care hospital in northern Taiwan. *Diagn.*  
884 *Microbiol. Infect. Dis.* **70**, 167–174 (2011).

- 885 41. DEMMLER, G. J., COUCH, R. S. & TABER, L. H. *Neisseria subflava* bacteremia and  
886 meningitis in a child: report of a case and review of the literature. *Pediatr. Infect. Dis. J.* **4**, 286–  
887 288 (1985).
- 888 42. Oill, P. A., Chow, A. W. & Guze, L. B. Adult bacteremic *Haemophilus parainfluenzae*  
889 infections: seven reports of cases and a review of the literature. *Arch. Intern. Med.* **139**, 985–988  
890 (1979).
- 891 43. Chan, J. F. W. *et al.* First report of spontaneous intrapartum *Atopobium vaginae*  
892 bacteremia. *J. Clin. Microbiol.* **50**, 2525–2528 (2012).
- 893 44. Mendes, R. E. *et al.* Assessment of linezolid resistance mechanisms among  
894 *Staphylococcus epidermidis* causing bacteraemia in Rome, Italy. *J. Antimicrob. Chemother.* **65**,  
895 2329–2335 (2010).
- 896 45. Choi, J. Y. *et al.* Mortality risk factors of *Acinetobacter baumannii* bacteraemia. *Intern.*  
897 *Med. J.* **35**, 599–603 (2005).
- 898 46. Wertlake, P. T. & Williams, T. W. Septicaemia caused by *Neisseria flavescens*. *J. Clin.*  
899 *Pathol.* **21**, 437–439 (1968).
- 900 47. Shah, S. S., Ruth, A. & Coffin, S. E. Infection due to *Moraxella osloensis*: case report  
901 and review of the literature. *Clin. Infect. Dis.* **30**, 179–181 (2000).
- 902 48. Felten, A., Barreau, C., Bizet, C., Lagrange, P. H. & Philippon, A. *Lactobacillus* species  
903 identification, H<sub>2</sub>O<sub>2</sub> production, and antibiotic resistance and correlation with human clinical  
904 status. *J. Clin. Microbiol.* **37**, 729–733 (1999).
- 905 49. Ježek, P. *et al.* *Corynebacterium imitans* isolated from blood culture in a patient with  
906 suspected bacteremia—the first isolation from human clinical material in the Czech Republic.  
907 *Klin. Mikrobiol. Infekcni Lek.* **20**, 98–101 (2014).
- 908 50. Friedman, J. & Alm, E. J. Inferring correlation networks from genomic survey data. *PLoS*  
909 *Comput Biol* **8**, e1002687 (2012).
- 910 51. Anhê, F. F. *et al.* Type 2 diabetes influences bacterial tissue compartmentalisation in  
911 human obesity. *Nat. Metab.* **2**, 233–242 (2020).
- 912 52. Emery, D. C. *et al.* Comparison of blood bacterial communities in periodontal health and  
913 periodontal disease. *Front. Cell. Infect. Microbiol.* **10**, 799 (2021).
- 914 53. Simon, A. K., Hollander, G. A. & McMichael, A. Evolution of the immune system in  
915 humans from infancy to old age. *Proc. R. Soc. B Biol. Sci.* **282**, 20143085 (2015).
- 916 54. Grumaz, C. *et al.* Rapid Next-Generation Sequencing–Based Diagnostics of Bacteremia  
917 in Septic Patients. *J. Mol. Diagn.* **22**, 405–418 (2020).
- 918 55. Tan, C. C. S., Acman, M., van Dorp, L. & Balloux, F. Metagenomic evidence for a  
919 polymicrobial signature of sepsis. *Microb. Genomics* **7**, (2021).
- 920 56. Grumaz, S. *et al.* Next-generation sequencing diagnostics of bacteremia in septic patients.  
921 *Genome Med.* **8**, 73 (2016).
- 922 57. Grumaz, S. *et al.* Enhanced performance of next-generation sequencing diagnostics  
923 compared with standard of care microbiological diagnostics in patients suffering from septic  
924 shock. *Crit. Care Med.* **47**, e394 (2019).
- 925 58. Faust, K. & Raes, J. Microbial interactions: from networks to models. *Nat. Rev.*  
926 *Microbiol.* **10**, 538–550 (2012).
- 927 59. Zelezniak, A. *et al.* Metabolic dependencies drive species co-occurrence in diverse  
928 microbial communities. *Proc. Natl. Acad. Sci.* **112**, 6449–6454 (2015).
- 929 60. Hibbing, M. E., Fuqua, C., Parsek, M. R. & Peterson, S. B. Bacterial competition:  
930 surviving and thriving in the microbial jungle. *Nat. Rev. Microbiol.* **8**, 15–25 (2010).



- 931 61. Cross, A. & Levine, M. M. Patterns of bacteraemia aetiology. *Lancet Infect. Dis.* **17**,  
932 1005–1006 (2017).
- 933 62. Dethlefsen, L., McFall-Ngai, M. & Relman, D. A. An ecological and evolutionary  
934 perspective on human–microbe mutualism and disease. *Nature* **449**, 811–818 (2007).
- 935 63. Geva-Zatorsky, N. *et al.* Mining the human gut microbiota for immunomodulatory  
936 organisms. *Cell* **168**, 928–943 (2017).
- 937 64. Gensollen, T., Iyer, S. S., Kasper, D. L. & Blumberg, R. S. How colonization by  
938 microbiota in early life shapes the immune system. *Science* **352**, 539–544 (2016).
- 939 65. Brenner, T. *et al.* Next-generation sequencing diagnostics of bacteremia in sepsis (Next  
940 GeneSiS-Trial): study protocol of a prospective, observational, noninterventional, multicenter,  
941 clinical trial. *Medicine (Baltimore)* **97**, (2018).
- 942 66. Shah, N. B. *et al.* Blood microbiome profile in CKD: a pilot study. *Clin. J. Am. Soc.*  
943 *Nephrol.* **14**, 692–701 (2019).
- 944 67. Camilleri, M. Leaky gut: mechanisms, measurement and clinical implications in humans.  
945 *Gut* **68**, 1516–1526 (2019).
- 946 68. Wu, D. *et al.* Large-scale whole-genome sequencing of three diverse Asian populations  
947 in Singapore. *Cell* **179**, 736–749 (2019).
- 948 69. Foong, A. W. P. *et al.* Rationale and methodology for a population-based study of eye  
949 diseases in Malay people: The Singapore Malay eye study (SiMES). *Ophthalmic Epidemiol.* **14**,  
950 25–35 (2007).
- 951 70. Lavanya, R. *et al.* Methodology of the Singapore Indian Chinese Cohort (SICC) eye  
952 study: quantifying ethnic variations in the epidemiology of eye diseases in Asians. *Ophthalmic*  
953 *Epidemiol.* **16**, 325–336 (2009).
- 954 71. Tan, K. H. X. *et al.* Cohort profile: the Singapore multi-ethnic cohort (mec) study. *Int. J.*  
955 *Epidemiol.* **47**, 699–699j (2018).
- 956 72. Soh, S.-E. *et al.* Cohort profile: Growing Up in Singapore Towards healthy Outcomes  
957 (GUSTO) birth cohort study. *Int. J. Epidemiol.* **43**, 1401–1409 (2014).
- 958 73. Teo, Y.-Y. *et al.* Singapore Genome Variation Project: a haplotype map of three  
959 Southeast Asian populations. *Genome Res.* **19**, 2154–2162 (2009).
- 960 74. Li, H. & Durbin, R. Fast and accurate short read alignment with Burrows–Wheeler  
961 transform. *bioinformatics* **25**, 1754–1760 (2009).
- 962 75. Gourel, H., Karlsson-Lindsjö, O., Hayer, J. & Bongcam-Rudloff, E. Simulating Illumina  
963 metagenomic data with InSilicoSeq. *Bioinformatics* **35**, 521–522 (2019).
- 964 76. Aitchison, J. The statistical analysis of compositional data. *J. R. Stat. Soc. Ser. B*  
965 *Methodol.* **44**, 139–160 (1982).
- 966 77. Van den Boogaart, K. G. & Tolosana-Delgado, R. “Compositions”: a unified R package  
967 to analyze compositional data. *Comput. Geosci.* **34**, 320–338 (2008).
- 968 78. Shaw, L. The phylogenetic range of bacterial and viral pathogens of vertebrates: dataset  
969 and supplementary material. Preprint at <https://doi.org/10.6084/m9.figshare.8262779.v2> (2020).
- 970 79. Jorgensen, J. *et al.* *Manual of Clinical Microbiology*. (American Society for  
971 Microbiology Press, 2015). doi:10.1128/9781555817381.
- 972 80. Langmead, B. & Salzberg, S. L. Fast gapped-read alignment with Bowtie 2. *Nat. Methods*  
973 **9**, 357–359 (2012).
- 974 81. Morgan, M., Pagès, H., Obenchain, V. & Hayden, N. Rsamtools: Binary alignment  
975 (BAM), FASTA, variant call (BCF), and tabix file import. R package version 2.8.0. (2021).

- 976 82. Kurtz, Z. D. *et al.* Sparse and compositionally robust inference of microbial ecological  
977 networks. *PLoS Comput Biol* **11**, e1004226 (2015).  
978 83. Csardi, G. & Nepusz, T. The igraph software package for complex network research.  
979 *InterJournal Complex Syst.* **1695**, 1–9 (2006).  
980 84. Wickham, H. ggplot2. *Wiley Interdiscip. Rev. Comput. Stat.* **3**, 180–185 (2011).  
981

**Figure 1**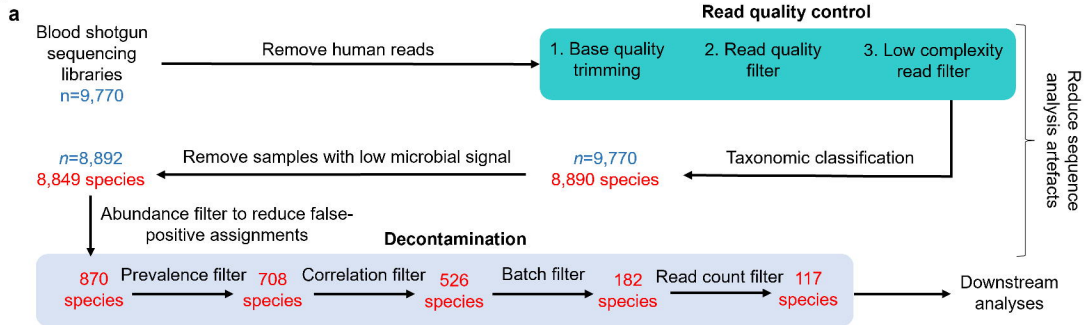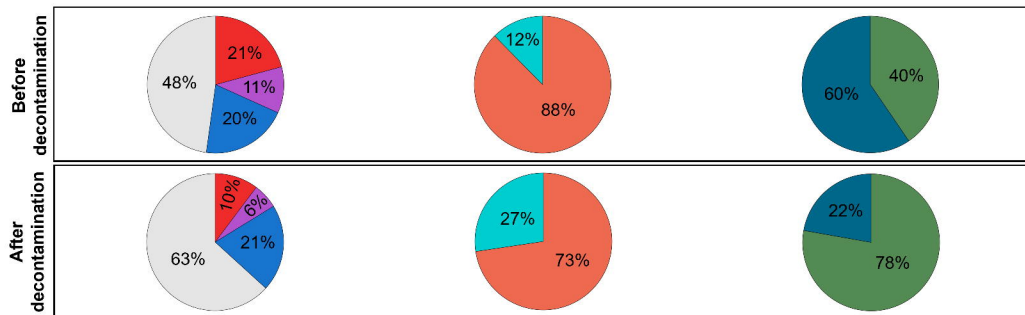**b** Contaminant?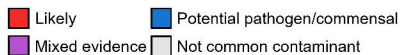**c** Detected in blood culture?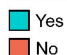**d** Human-associated?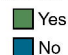

**Figure 2**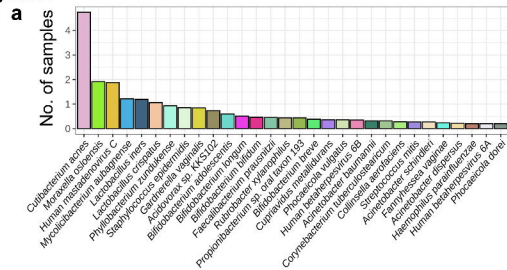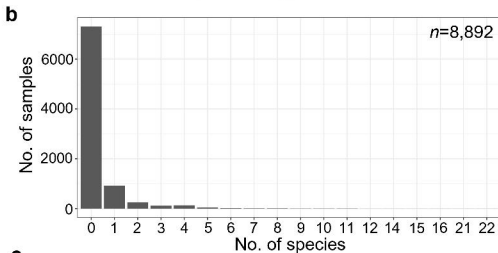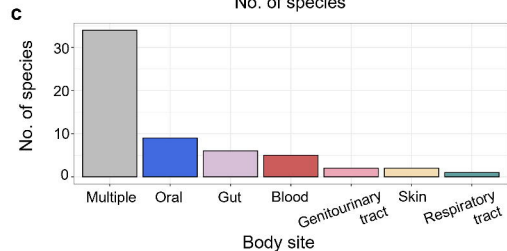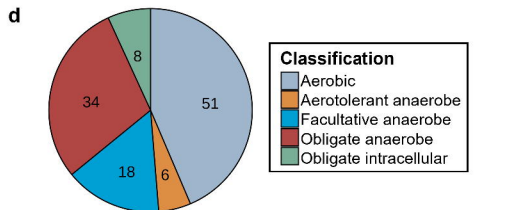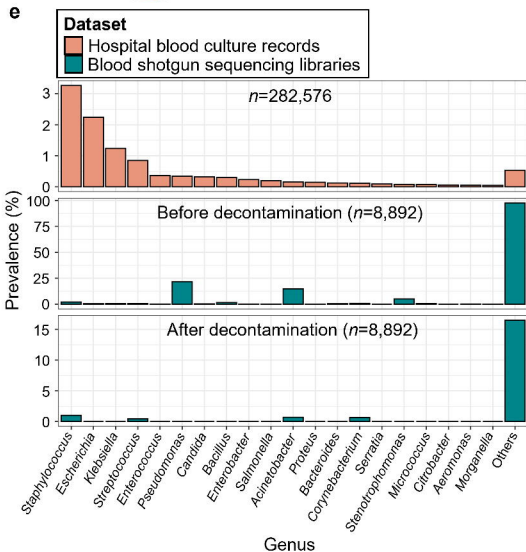

**Figure 3**

| Sample    | Species                            | Body site(s)                        | Reported in blood | No. of read pairs assigned | Overall prevalence (%) | PTR  |
|-----------|------------------------------------|-------------------------------------|-------------------|----------------------------|------------------------|------|
| WHB4594   | <i>Fusobacterium nucleatum</i>     | genitourinary tract, gut, mouth     | ✓                 | 194199                     | 0.11                   | 1.68 |
| WHB9179   | <i>Neisseria subflava</i>          | gut, mouth                          | ✓                 | 15385                      | 0.16                   | 1.51 |
| WHB9179   | <i>Haemophilus parainfluenzae</i>  | gut, mouth, respiratory tract       | ✓                 | 12183                      | 0.2                    | 1.17 |
| WHB4035   | <i>Fannyhessea vaginae</i>         | genitourinary tract                 | ✓                 | 10395                      | 0.24                   | 1.88 |
| WHB6459   | <i>Staphylococcus epidermidis</i>  | gut, mouth, respiratory tract, skin | ✓                 | 9140                       | 0.85                   | 1.57 |
| WHB10710  | <i>Lactobacillus crispatus</i>     | genitourinary tract, gut, mouth     | ✓                 | 7799                       | 1.06                   | 1.57 |
| 0116-0053 | <i>Acinetobacter baumannii</i>     | mouth                               | ✓                 | 7673                       | 0.31                   | 1.9  |
| WHB9179   | <i>Neisseria flavescens</i>        | mouth                               | ✓                 | 3787                       | 0.06                   | 1.38 |
| WHB9978   | <i>Rickettsia sp. Tillamook 23</i> |                                     | ✗                 | 2923                       | 0.02                   | 1.35 |
| WHH1248   | <i>Moraxella osloensis</i>         | skin                                |                   | 2402                       | 1.91                   | 1.33 |
| WHB9812   | <i>Corynebacterium imitans</i>     |                                     | ✓                 | 1976                       | 0.02                   | 1.59 |

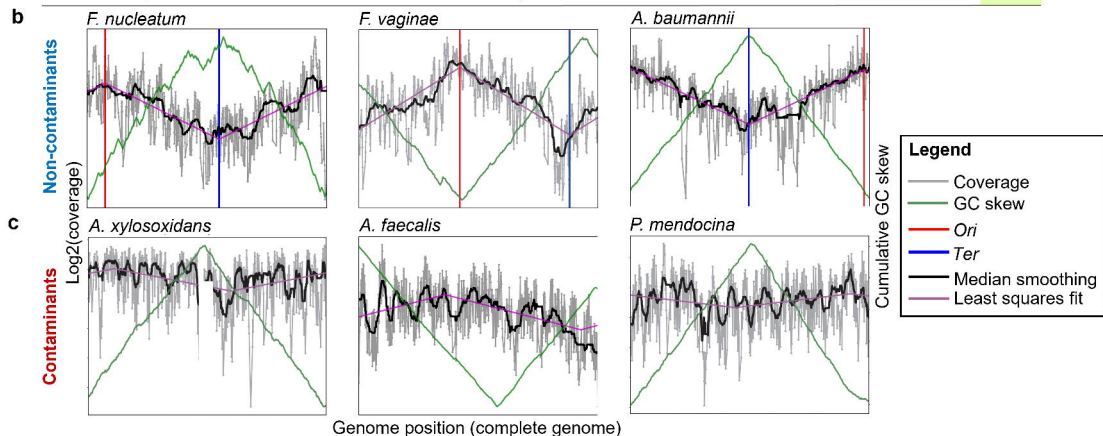

**Figure 4**

**a**

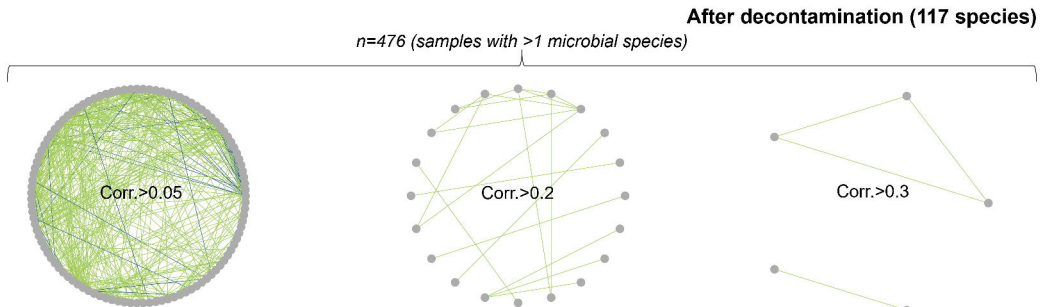

**b**

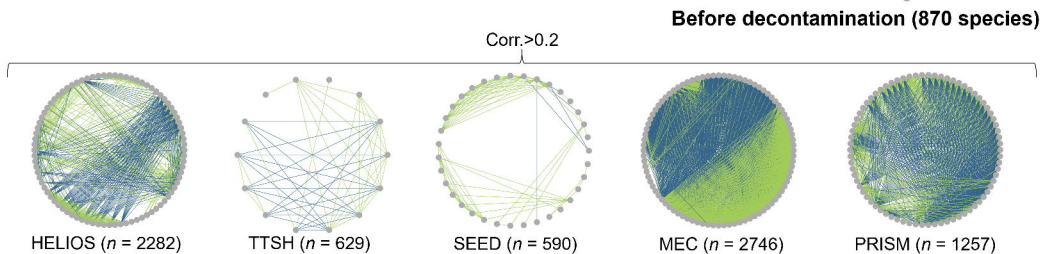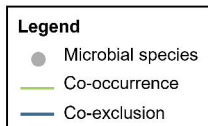

No common associations

Figure 5

Blood microbiome model

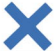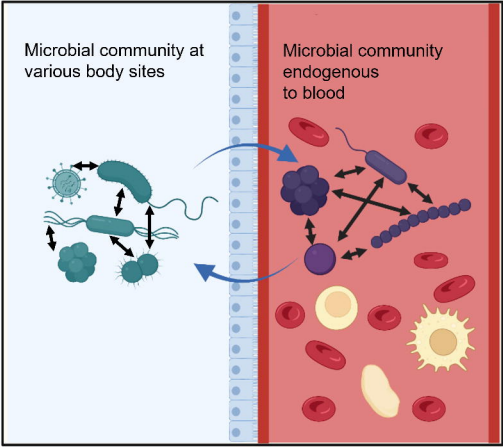

Transient translocation model

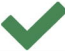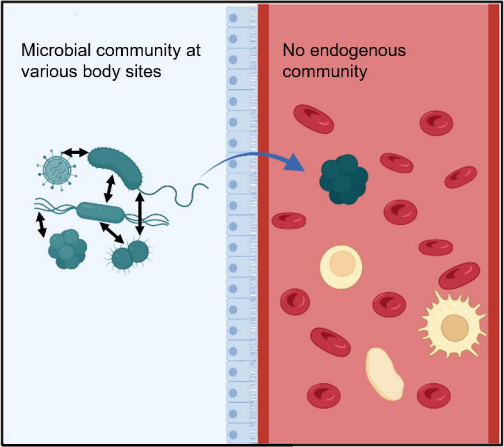

Legend

↔ Microbial interaction

Red blood cells

Microbes

→ Translocation

Other blood cells

Barrier
