# Supplementary material for: No evidence for a common blood microbiome based on a population study of 9,770 healthy humans
Source: bioRxiv preprint, doi:10.1101/2022.07.29.502098, version 2 (2022-12-04)
Supplement: Supplementary Table 5 [file 502098_file11.xlsx]

## Sheet: Supplementary Table 5
Species	Prevalence (%)
Sphingomonas melonis	51.9906
Bradyrhizobium sp. PSBB068	51.9681
Methylobacterium currus	51.5744
Bradyrhizobium sp. SK17	48.4143
Sphingomonas paucimobilis	48.0544
Rhodopseudomonas palustris	47.4584
Sphingomonas sp. FARSPH	46.0751
Bradyrhizobium diazoefficiens	45.3441
Sphingomonas sp. LM7	44.5457
Bradyrhizobium betae	44.287
Sphingomonas sp. Cra20	43.9271
Bradyrhizobium erythrophlei	43.8709
Sphingomonas hengshuiensis	42.6788
Pseudomonas aeruginosa	42.5551
Sphingomonas koreensis	40.2834
Sphingobium yanoikuyae	39.8448
Bradyrhizobium sp. BTAi1	39.4624
Brevundimonas sp. SGAir0440	37.5619
Sphingomonas alpina	37.5169
Brevundimonas sp. CS1	37.247
Bradyrhizobium sp. CCBAU 51753	36.8309
Methylobacterium aquaticum	36.6847
Bradyrhizobium sp. CCBAU 53421	35.3126
Sphingomonas sp. CL5.1	34.874
Sphingomonas sp. AAP5	34.5929
Methylobacterium brachiatum	34.4354
Afipia carboxidovorans	34.368
Bradyrhizobium lablabi	34.0081
Tardiphaga robiniae	33.9519
Brevundimonas sp. GW460-12-10-14-LB2	33.8507
Sphingomonas sp. XS-10	33.8282
Bradyrhizobium canariense	33.7832
Bradyrhizobium sp. 6(2017)	33.3896
Bradyrhizobium sp. CCBAU 051011	33.2996
Bradyrhizobium icense	33.2659
Brevundimonas sp. 'scallop'	32.6923
Novosphingobium sp. ABRDHK2	32.3437
Sphingomonas sp. LK11	32.2762
Bradyrhizobium paxllaeri	32.1413
Sphingomonas taxi	32.0175
Cutibacterium acnes	31.6014
Sphingomonas sanxanigenens	31.3765
Rhizobium oryzihabitans	30.8704
Bradyrhizobium sp. ORS 285	30.8592
Bradyrhizobium genosp. L	30.8142
Sphingomonas panacis	30.7355
Methylorubrum extorquens	30.5893
Sphingomonas sp. AP4-R1	30.4993
Sphingomonas sp. DH-S5	30.4768
Methylorubrum populi	30.3644
Sphingosinithalassobacter sp. CS137	30.2294
Sphingomonas sp. NBWT7	29.5771
Caulobacter vibrioides	29.4647
Brevundimonas vesicularis	29.206
Sphingomonas panacisoli	29.1498
Sphingomonas sp. HMP6	29.0148
Sphingomonas sp. MM-1	28.6662
Sphingomonas sp. NIC1	28.3176
Sphingomonas insulae	28.2951
Sphingomonas wittichii	28.2726
Bradyrhizobium sp. ORS 278	28.2389
Sphingomonas sp. LMO-1	28.2389
Brevibacterium casei	28.0027
Sphingomonas sp. HMP9	27.7665
Alcaligenes faecalis	27.7215
Sphingobium sp. YG1	27.7215
Sphingosinithalassobacter sp. zrk23	27.5866
Escherichia coli	27.2605
Chelatococcus daeguensis	27.2492
Nitrobacter hamburgensis	27.1817
Ralstonia pickettii	27.1592
Caulobacter mirabilis	26.9456
Caulobacter sp. FWC26	26.8668
Methylobacterium durans	26.7319
Sphingomonas sp. PAMC26645	26.6644
Ralstonia insidiosa	26.417
Acinetobacter johnsonii	26.2146
Methylobacterium sp. 17Sr1-43	26.1134
Bradyrhizobium japonicum	26.0909
Sphingopyxis macrogoltabida	26.0571
Sphingopyxis granuli	25.7647
Alcaligenes sp. SORT26	25.6635
Caulobacter flavus	25.596
Rhodococcus sp. P-2	25.5173
Sphingomonas sp. C33	25.4498
Toxoplasma gondii	25.1574
Bradyrhizobium zhanjiangense	24.6289
Delftia acidovorans	24.5052
Pseudomonas stutzeri	24.4602
Caulobacter soli	24.3252
Fusarium graminearum	24.0441
Herbaspirillum huttiense	24.0441
Caulobacter segnis	23.9541
Methylobacterium sp. WL1	23.8641
Methylobacterium sp. 4-46	23.8529
Bradyrhizobium sp. CCBAU 51765	23.7629
Caulobacter sp. K31	23.7179
Caulobacter rhizosphaerae	23.6392
Bradyrhizobium sp. CCGE-LA001	23.6167
Methylobacterium mesophilicum	23.5493
Bradyrhizobium oligotrophicum	23.3468
Kinneretia sp. DAIF2	23.2119
Methylobacterium phyllosphaerae	23.1107
Sphingobium cloacae	22.942
Pseudomonas putida	22.852
Sphingobium sp. CAP-1	22.7508
Bradyrhizobium symbiodeficiens	22.6721
Sphingomonas sp. KC8	22.5484
Sphingopyxis lindanitolerans	22.5259
Sphingobium sp. MI1205	22.5146
Sphingomonas sp. C8-2	22.4471
Bradyrhizobium sp. CCBAU 53338	22.3684
Rhizorhabdus dicambivorans	22.3684
Sphingobium sp. SYK-6	22.1885
Sphingopyxis fribergensis	22.1435
Sphingosinicella sp. BN140058	22.0873
Variovorax paradoxus	21.9748
Sphingobium baderi	21.9636
Caulobacter henricii	21.8623
Sphingomonas sp. MK52	21.8174
Sphingopyxis sp. PAMC25046	21.6599
Sphingobium amiense	21.57
Sphingopyxis sp. 113P3	21.4013
Bradyrhizobium cosmicum	21.3563
Sphingobium sp. TKS	21.2663
Bradyrhizobium sp. CCBAU 53340	21.1763
Sphingobium sp. RAC03	21.1763
Novosphingobium sp. P6W	20.8052
Bosea sp. Tri-49	20.794
Methylobacterium sp. 17Sr1-1	20.7827
Pseudomonas sihuiensis	20.6815
Methylobacterium nodulans	20.5353
Novosphingobium resinovorum	20.2879
Sphingobium sp. KCTC 72723	20.2654
Bradyrhizobium guangdongense	20.2429
Pseudomonas fluorescens	20.063
Sphingomonas sp. IC081	20.0517
Methylobacterium terrae	19.973
Sphingopyxis sp. FD7	19.9055
Bradyrhizobium sp. 1(2017)	19.6356
Sphingobium hydrophobicum	19.5682
Methylobacterium indicum	19.4444
Sphingobium sp. Cam5-1	19.2308
Bradyrhizobium genosp. B	18.9946
Klebsiella pneumoniae	18.9496
Delftia tsuruhatensis	18.9159
Bradyrhizobium guangzhouense	18.5223
Sphingobium sp. PAMC28499	18.4885
Altererythrobacter sp. B11	18.4323
Bradyrhizobium sp. CCBAU 53351	18.3986
Bradyrhizobium vignae	18.2749
Bradyrhizobium arachidis	18.2299
Pseudomonas mendocina	18.2299
Allosphingosinicella indica	18.1624
Methylobacterium radiotolerans	18.1287
Sphingobium herbicidovorans	17.9825
Sphingopyxis sp. QXT-31	17.7126
Sphingobium sp. SCG-1	17.7013
Sphingopyxis sp. OPL5	17.6676
Stenotrophomonas maltophilia	17.4989
Mitsuaria sp. 7	17.4089
Afipia sp. GAS231	17.0603
Microbacterium testaceum	17.0153
Pseudomonas alcaliphila	16.8241
Agrobacterium tumefaciens	16.7004
Microbacterium sp. BH-3-3-3	16.5879
Bradyrhizobium sp.	16.5205
Sphingomonas ginsengisoli An et al. 2013	16.2731
Bosea sp. ANAM02	16.0819
Ralstonia solanacearum	16.0819
Phreatobacter cathodiphilus	16.0256
Bradyrhizobium guangxiense	16.0144
Achromobacter xylosoxidans	15.9132
Brevundimonas sp. LVF1	15.9019
Bosea sp. AS-1	15.857
Moraxella osloensis	15.8232
Bosea sp. RAC05	15.4184
Novosphingobium pentaromativorans	15.3284
Microbacterium sp. PM5	15.3059
Nitrobacter winogradskyi	15.1709
Pseudomonas sp. LPH1	15.0585
Pseudomonas sp. phDV1	14.8111
Sphingobium sp. RSMS	14.8111
Methylobacterium sp. C1	14.6986
Pseudomonas oleovorans	14.6874
Pseudomonas sediminis	14.6649
Methylobacterium sp. AMS5	14.6536
Microbacterium oxydans	14.3162
Pseudomonas toyotomiensis	14.1813
Microbacterium hominis	14.1026
Ralstonia mannitolilytica	14.0463
Sphingopyxis terrae	13.9901
Pseudomonas sp. B11D7D	13.9789
Methylobacterium sp. XJLW	13.9676
Bradyrhizobium sp. LCT2	13.8102
Pseudomonas alcaligenes	13.7764
Rhizobium leguminosarum	13.709
Pseudomonas chlororaphis	13.6302
Bordetella genomosp. 13	13.5065
Sphingobium sp. EP60837	13.3153
Pseudomonas nitroreducens	13.2366
Pseudomonas sp. MSPm1	13.2254
Pseudomonas sp. TUM18999	13.0904
Paraburkholderia fungorum	12.9892
Pseudorhodoplanes sinuspersici	12.9442
Pseudomonas sp. S1-A32-2	12.7755
Brevundimonas naejangsanensis	12.6068
Pseudomonas balearica	12.5506
Pseudomonas otitidis	12.5056
Pseudomonas fulva	12.4944
Pseudomonas sp. K2W31S-8	12.4944
Mesorhizobium sp. L-2-11	12.4381
Pseudomonas furukawaii	12.4381
Paucibacter sp. KCTC 42545	12.4157
Pseudomonas sp. LPB0260	12.4044
Pseudomonas khazarica	12.3482
Pseudomonas sp. CC6-YY-74	12.2807
Methylobacterium sp. DM1	12.2695
Microbacterium chocolatum	12.1345
Bradyrhizobium amphicarpaeae	11.9996
Pseudomonas tolaasii	11.9658
Roseateles depolymerans	11.9658
Pseudomonas resinovorans	11.9321
Phyllobacterium sp. 628	11.9208
Rhodococcus qingshengii	11.8421
Sphingomonas sp. sand1-3	11.7184
Tardibacter chloracetimidivorans	11.6622
Rhodococcus sp. NJ-530	11.5047
Phenylobacterium zucineum	11.426
Rubrivivax gelatinosus	11.3698
Thauera aromatica	11.3585
Pseudomonas sp. ABC1	11.3023
Pseudomonas sp. TCU-HL1	11.3023
Pseudolabrys sp. FHR47	11.2798
Rhodoplanes sp. Z2-YC6860	11.2686
Staphylococcus epidermidis	10.9537
Bosea vaviloviae	10.8862
Leishmania braziliensis	10.8412
Pseudolabrys taiwanensis	10.8412
Sphingomonas sp. HDW15C	10.785
Mesorhizobium sp. Pch-S	10.74
Variibacter gotjawalensis	10.7175
Cupriavidus taiwanensis	10.65
Sphingopyxis alaskensis	10.4926
Ochrobactrum sp. LM19	10.4026
Schlegelella thermodepolymerans	10.3914
Rhizobacter sp. AJA081-3	10.2677
Alcaligenes aquatilis	10.2002
Rhodococcus erythropolis	10.1664
Sphingobium chungbukense	10.1664
Microbacterium sp. 10M-3C3	10.1439
Microvirga ossetica	10.1439
Micrococcus luteus	9.73909
Paracoccus sp. Arc7-R13	9.69411
Ramlibacter tataouinensis	9.44669
Burkholderia contaminans	9.37922
Microvirga sp. VF16	9.23302
Phreatobacter stygius	9.23302
Leptothrix cholodnii	9.22177
Phyllobacterium zundukense	9.06433
Acidovorax sp. KKS102	9.05308
Inhella inkyongensis	8.95187
Cupriavidus basilensis	8.92937
Xanthobacter sp. YN2	8.92937
Bradyrhizobium sp. WSM471	8.83941
Rhizobacter gummiphilus	8.67072
Brevundimonas mediterranea	8.62573
Lysobacter enzymogenes	8.41206
Achromobacter deleyi	8.36707
Syntrophotalea carbinolica	8.35583
Microvirga thermotolerans	8.34458
Delftia lacustris	8.32209
Methylobacterium oryzae	8.26586
Methylorubrum zatmanii	8.25461
Sphingomonas sp. HDW15B	8.24336
Microbacterium sp. Nx66	8.11966
Rhodoferax sp. BAB1	8.02969
Microbacterium sp. Y-01	7.96221
Alicycliphilus denitrificans	7.89474
Sphingomonas rhizophila	7.79352
Burkholderia sp. YI23	7.74854
Microbacterium lemovicicum	7.73729
Microbacterium oleivorans	7.5686
Aquabacterium olei	7.43365
Bosea sp. F3-2	7.43365
Microcella alkaliphila	7.37742
Pseudomonas sp. DY-1	7.36617
Croceicoccus marinus	7.34368
Cupriavidus necator	7.24247
Microvirga sp. 17 mud 1-3	7.24247
Bradyrhizobium ottawaense	7.21997
Paraburkholderia aromaticivorans	7.21997
Pseudomonas knackmussii	7.19748
Microbacterium sp. RG1	7.1525
Paraburkholderia phytofirmans	7.14125
Microbacterium sp. 4R-513	7.13
Microbacterium foliorum	7.06253
Cupriavidus metallidurans	7.05128
Sphingomonas lutea	6.99505
Sphaerotilus natans	6.98381
Pseudomonas lalkuanensis	6.88259
Microbacterium aurum	6.83761
Microbacterium sp. WY121	6.75888
Burkholderia multivorans	6.69141
Microbacterium sp. NY27	6.62393
Starkeya sp. ORNL1	6.5677
Bosea sp. PAMC 26642	6.55646
Paracoccus liaowanqingii	6.55646
Sphingosinicella sp. UDD2	6.55646
Paraburkholderia sp. 7MH5	6.53396
Sorangium cellulosum	6.52272
Brevundimonas sp. LVF2	6.48898
Burkholderia cenocepacia	6.43275
Comamonas thiooxydans	6.34278
Microbacterium sp. ABRD_28	6.32029
Microbacterium sp. LKL04	6.25281
Microbacterium wangchenii	6.24157
Microbacterium sp. No. 7	6.16284
Klebsiella grimontii	6.1291
Paraburkholderia tropica	5.96041
Pannonibacter phragmitetus	5.94917
Microbacterium pygmaeum	5.93792
Halomonas sp. THAF5a	5.88169
Clostridium botulinum	5.79172
Malassezia restricta	5.74674
Pseudomonas oryzae	5.74674
Streptomyces sp. CMB-StM0423	5.74674
Variovorax sp. HW608	5.74674
Leishmania panamensis	5.73549
Achromobacter spanius	5.72425
Microbacterium lushaniae	5.713
Achromobacter denitrificans	5.70175
Sphingobium japonicum	5.70175
Microbacterium sp. A18JL200	5.69051
Cupriavidus pauculus	5.63428
Sphingobium chlorophenolicum	5.5668
Paraburkholderia acidiphila	5.54431
Microbacterium caowuchunii	5.52182
Sinorhizobium fredii	5.49933
Comamonas testosteroni	5.37562
Paracoccus sp. AK26	5.37562
Sphingomonas sediminicola	5.31939
Burkholderia gladioli	5.28565
Paraburkholderia acidisoli	5.2744
Hydrogenophaga crassostreae	5.17319
Microbacterium sp. JZ31	5.1507
Mesorhizobium sp. 8	5.11696
Labrys sp. KNU-23	5.04948
Candidatus Nitrosocosmicus franklandus	5.0045
Chelatococcus sp. CO-6	4.97076
Brevundimonas sp. LM2	4.93702
Burkholderia sp. DHOD12	4.8583
Massilia oculi	4.8583
Acidovorax avenae	4.81332
Aeromonas sp. ASNIH3	4.80207
Brucella anthropi	4.77958
Achromobacter sp. MFA1 R4	4.75709
Burkholderia pseudomallei	4.74584
Xanthomonas euvesicatoria	4.72335
Azorhizobium caulinodans	4.70085
Microbacterium sp. YJN-G	4.68961
Human mastadenovirus C	4.63338
Achromobacter sp. AONIH1	4.62213
Brevundimonas sp. DS20	4.59964
Propionibacterium sp. oral taxon 193	4.55466
Sphingobium barthaii	4.55466
Corynebacterium kefirresidentii	4.54341
Acidovorax sp. JMULE5	4.50967
Microbacterium sediminis	4.49843
Sinorhizobium meliloti	4.47593
Cupriavidus oxalaticus	4.45344
Phreatobacter sp. NMCR1094	4.4422
Mesorhizobium loti	4.40846
Corynebacterium tuberculostearicum	4.38596
Microbacterium sp. XT11	4.37472
Paraburkholderia xenovorans	4.37472
Sphingobium fuliginis	4.34098
Starkeya novella	4.34098
Clavibacter michiganensis	4.32973
Massilia putida	4.30724
Achromobacter insolitus	4.22852
Microbacterium schleiferi	4.21727
Paracoccus yeei	4.21727
Gordonia terrae	4.20603
Agrobacterium vitis	4.17229
Mesorhizobium sp. DCY119	4.1498
Acidovorax monticola	4.13855
Microbacterium oryzae	4.13855
Hyphomicrobium denitrificans	4.11606
Microbacterium sp. A18JL241	4.07108
Achromobacter sp. B7	4.05983
Mycolicibacterium aubagnense	4.05983
Cereibacter sphaeroides	4.04858
Acinetobacter baumannii	4.03734
Acidovorax carolinensis	3.99235
Sphingomonas sp.	3.96986
Achromobacter pestifer	3.95861
Gordonia sp. JH63	3.95861
Staphylococcus haemolyticus	3.95861
Microbacterium sp. CBA3102	3.94737
Mesorhizobium sp. M1B.F.Ca.ET.045.04.1.1	3.91363
Aquabacter sp. L1I39	3.89114
Hydrogenophaga sp. BA0156	3.89114
Mesorhizobium sp. INR15	3.87989
Parasphingopyxis algicola	3.86865
Bradyrhizobium elkanii	3.8574
Paracoccus sanguinis	3.8574
Burkholderia cepacia	3.83491
Ancylobacter sp. TS-1	3.78992
Ensifer adhaerens	3.78992
Plasmodium malariae	3.76743
Blastochloris viridis	3.74494
Massilia sp. LPB0304	3.74494
Rhizobium tropici	3.73369
Bacillus cereus	3.7112
Staphylococcus aureus	3.7112
Rubrobacter xylanophilus	3.69996
Mesorhizobium sp. N3	3.63248
Paraburkholderia phymatum	3.63248
Deinococcus sp. NW-56	3.62123
Acidovorax sp. 1608163	3.60999
Paraburkholderia dokdonella	3.59874
Novosphingobium aromaticivorans	3.58749
Microbacterium protaetiae	3.565
Rhizobium sp. 11515TR	3.565
Babesia bigemina	3.53126
Paraburkholderia caffeinilytica	3.53126
Mesorhizobium sp. M1E.F.Ca.ET.045.02.1.1	3.52002
Comamonas aquatica	3.50877
Microbacterium esteraromaticum	3.50877
Rhodoferax koreense	3.50877
Sphingosinicella microcystinivorans	3.50877
Aminobacter sp. MSH1	3.48628
Rhizobium etli	3.47503
Paraburkholderia megapolitana	3.46379
Microbacterium sp. Se63.02b	3.4413
Shinella sp. HZN7	3.4413
Mesorhizobium sp. M1D.F.Ca.ET.043.01.1.1	3.43005
Stappia indica	3.43005
Sulfuritalea hydrogenivorans	3.43005
Mycobacterium tuberculosis	3.39631
Paraburkholderia sp. SOS3	3.39631
Paraburkholderia atlantica	3.38507
Rhodococcus sp. YL-1	3.38507
Cupriavidus pinatubonensis	3.37382
Variovorax sp. WDL1	3.36257
Paracoccus sp. MC1862	3.35133
Burkholderia lata	3.2951
Brevundimonas sp. M20	3.25011
Methylocystis heyeri	3.25011
Methylosinus trichosporium	3.23887
Sphingopyxis sp. EG6	3.23887
Paraburkholderia caribensis	3.22762
Microbacterium sp. TPU 3598	3.20513
Sinorhizobium sp. RAC02	3.18264
Novosphingobium sp. PP1Y	3.17139
Cupriavidus sp. USMAA2-4	3.16014
Methylibium petroleiphilum	3.1489
Microbacterium sp. 1S1	3.12641
Paraburkholderia ginsengisoli	3.10391
Kaistia sp. 32K	3.09267
Lactobacillus iners	3.05893
Mesorhizobium terrae	3.04768
Staphylococcus hominis	3.02519
Acinetobacter junii	3.01395
Sphingomonas lacunae	3.01395
Leifsonia xyli	3.0027
Lichenihabitans psoromatis	2.98021
Mesorhizobium sp. J8	2.98021
Rhodoferax sediminis	2.96896
Brevundimonas sp. MF30-B	2.95771
Burkholderia ubonensis	2.95771
Acinetobacter schindleri	2.94647
Paraburkholderia terricola	2.94647
Gardnerella vaginalis	2.92398
Mesorhizobium sp. M7D.F.Ca.US.005.01.1.1	2.91273
Rhizobium jaguaris	2.90148
Massilia sp. WG5	2.87899
Blastochloris tepida	2.86775
Brevundimonas diminuta	2.84525
Nitrospirillum amazonense	2.83401
Staphylococcus capitis	2.82276
Variovorax sp. PAMC26660	2.81152
Sphingomonas xanthus	2.80027
Bradyrhizobium sp. TM102	2.78902
Paraburkholderia caledonica	2.78902
Polaromonas sp. JS666	2.75529
Neorhizobium galegae	2.74404
Leifsonia shinshuensis	2.72155
Hydrogenophaga sp. YM1	2.69906
Ancylobacter pratisalsi	2.68781
Brucella pituitosa	2.66532
Pandoraea pnomenusa	2.66532
Mesorhizobium australicum	2.65407
Acinetobacter bereziniae	2.63158
Mycobacterium kansasii	2.63158
Paraburkholderia phenoliruptrix	2.63158
Tsukamurella tyrosinosolvens	2.62033
Aureimonas sp. AU20	2.60909
Devosia sp. A16	2.60909
Xylophilus rhododendri	2.59784
Paraburkholderia sprentiae	2.58659
Methylocystis parvus	2.57535
Microbacterium hydrocarbonoxydans	2.57535
Acidovorax sp. RAC01	2.5641
Streptococcus mitis	2.5641
Kytococcus sedentarius	2.55286
Lactobacillus crispatus	2.55286
Burkholderia stabilis	2.51912
Mesorhizobium sp. M4B.F.Ca.ET.058.02.1.1	2.51912
Sporisorium graminicola	2.51912
Mesorhizobium sp. M3A.F.Ca.ET.080.04.2.1	2.50787
Stella humosa	2.50787
Staphylococcus cohnii	2.49663
Azospirillum brasilense	2.48538
Methylibium sp. Pch-M	2.48538
Hydrogenophaga sp. PBC	2.46289
Mesorhizobium oceanicum	2.45164
Methylovirgula ligni	2.45164
Chelativorans sp. BNC1	2.42915
Cupriavidus gilardii	2.39541
Mesorhizobium amorphae	2.39541
Mesorhizobium sp. 131-2-1	2.39541
Skermanella sp. TT6	2.39541
Cupriavidus campinensis	2.35043
Janthinobacterium sp. 1_2014MBL_MicDiv	2.33918
Diaphorobacter sp. JS3051	2.32794
Pseudomonas oryzihabitans	2.32794
Mesorhizobium sp. M8A.F.Ca.ET.057.01.1.1	2.31669
Paracoccus zhejiangensis	2.31669
Limosilactobacillus fermentum	2.30544
Methylocystis rosea	2.30544
Novosphingobium sp. THN1	2.30544
Rathayibacter sp. VKM Ac-2759	2.2942
Cloacibacterium normanense	2.28295
Undibacterium sp. YM2	2.28295
Verminephrobacter eiseniae	2.28295
Rhizobium pusense	2.26046
Cutibacterium granulosum	2.24921
Ensifer sp. PDNC004	2.24921
Hydrogenophaga sp. BPS33	2.22672
Epilithonimonas vandammei	2.21547
Burkholderia plantarii	2.20423
Corynebacterium jeikeium	2.20423
Paraburkholderia graminis	2.20423
Rhizobium sp. BG4	2.20423
Bifidobacterium longum	2.15924
Mesorhizobium sp. M1A.F.Ca.IN.022.06.1.1	2.15924
Roseomonas sp. 546	2.15924
Ruminococcus gnavus	2.148
Novosphingobium sp. ES2-1	2.13675
Variovorax sp. RKNM96	2.13675
Faecalibacterium prausnitzii	2.12551
Variovorax sp. PAMC 28711	2.12551
Hartmannibacter diazotrophicus	2.11426
Breoghania sp. L-A4	2.09177
Pseudomonas monteilii	2.09177
Pseudomonas sp. SXM-1	2.09177
Burkholderia anthina	2.08052
Neorhizobium sp. NCHU2750	2.08052
Aspergillus oryzae	2.06928
Porphyrobacter sp. CACIAM 03H1	2.05803
Novosphingobium sp. Gsoil 351	2.04678
Paraburkholderia hospita	2.04678
Haemophilus parainfluenzae	2.03554
Janthinobacterium svalbardensis	2.03554
Hyphomicrobium nitrativorans	2.02429
Qipengyuania flava	2.02429
Aeromonas caviae	2.01305
Novosphingobium sp. KA1	2.0018
Polaromonas naphthalenivorans	2.0018
Acinetobacter tandoii	1.99055
Leishmania major	1.99055
Mesorhizobium sp. NZP2298	1.99055
Phocaeicola vulgatus	1.99055
Rhodococcus phage Sleepyhead	1.99055
Brevundimonas subvibrioides	1.97931
Burkholderia glumae	1.96806
Dictyostelium discoideum	1.96806
Hydrogenophaga sp. RAC07	1.96806
Hypericibacter terrae	1.96806
Leifsonia sp. 21MFCrub1.1	1.96806
Shinella sp. PSBB067	1.96806
Variovorax sp. PAMC28562	1.94557
Mesorhizobium sp. M2A.F.Ca.ET.043.05.1.1	1.93432
Achromobacter ruhlandii	1.92308
Botrytis cinerea	1.92308
Brevundimonas sp. Bb-A	1.92308
Rhizobium rosettiformans	1.92308
Undibacterium sp. KW1	1.92308
Brucella intermedia	1.91183
Duganella sp. GN2-R2	1.91183
Bifidobacterium adolescentis	1.90058
Brevundimonas sp. GRTSA-9	1.90058
Mesorhizobium sp. NZP2077	1.90058
Pseudoxanthomonas suwonensis	1.90058
Enterobacter cloacae	1.88934
Herbiconiux sp. SALV-R1	1.88934
Nitratireductor sp. OM-1	1.88934
Stenotrophomonas rhizophila	1.88934
Buchnera aphidicola	1.87809
Herbaspirillum rubrisubalbicans	1.87809
Asticcacaulis excentricus	1.86685
Porphyrobacter sp. YT40	1.86685
Streptomyces davaonensis	1.86685
Janthinobacterium agaricidamnosum	1.8556
Methylocella tundrae	1.8556
Legionella longbeachae	1.84435
Mesorhizobium huakuii	1.84435
Acinetobacter lwoffii	1.83311
Leishmania mexicana	1.83311
Paraburkholderia sp. Msb3	1.83311
Ferrovibrio terrae	1.82186
Streptomyces venezuelae	1.82186
Herbaspirillum robiniae	1.81062
Leifsonia sp. PS1209	1.81062
Ralstonia pseudosolanacearum	1.81062
Ornithinimicrobium sp. AMA3305	1.79937
Prevotella copri	1.79937
Serratia marcescens	1.79937
Variovorax sp. RA8	1.79937
Acidovorax antarcticus	1.78812
Thauera sp. K11	1.78812
Collimonas arenae	1.77688
Azospirillum thermophilum	1.76563
Collinsella aerofaciens	1.76563
Rhizobium sp. NXC24	1.76563
Fusobacterium nucleatum	1.75439
Hylemonella gracilis	1.75439
Bacteroides fragilis	1.74314
Bradyrhizobium sp. SG09	1.74314
Methylocella silvestris	1.74314
Polymorphum gilvum	1.74314
Sphingomonas sp. HDW15A	1.74314
Ensifer mexicanus	1.72065
Mesorhizobium sp. M2A.F.Ca.ET.046.03.2.1	1.72065
Dermacoccus nishinomiyaensis	1.7094
Microbacterium sp. PAMC 28756	1.7094
Phocaeicola dorei	1.7094
Plasmodium falciparum	1.7094
Plasmodium relictum	1.7094
Rhizobium phaseoli	1.69816
Rhizobium sp. 007	1.69816
Tistrella mobilis	1.69816
Clostridium perfringens	1.68691
Georhizobium profundi	1.68691
Gluconacetobacter diazotrophicus	1.68691
Blattabacterium cuenoti	1.67566
Agrobacterium rhizogenes	1.66442
Melaminivora sp. SC2-9	1.66442
Mesorhizobium sp. NBSH29	1.66442
Plasmodium yoelii	1.66442
Trypanosoma brucei	1.66442
Bordetella hinzii	1.65317
Prevotella intermedia	1.65317
Mesorhizobium sp. M9A.F.Ca.ET.002.03.1.2	1.64193
Paracoccus pantotrophus	1.64193
Pseudomonas sp. NC02	1.64193
Bifidobacterium bifidum	1.63068
Brevundimonas sp. AJA228-03	1.63068
Corynebacterium segmentosum	1.63068
Paraburkholderia sp. PGU16	1.63068
Azospirillum lipoferum	1.61943
Finegoldia magna	1.61943
Hydrogenophaga sp. PBL-H3	1.61943
Martelella endophytica	1.61943
Mesorhizobium japonicum	1.61943
Ornithinimicrobium flavum	1.61943
Paracoccus contaminans	1.61943
Rhizobium pseudoryzae	1.61943
Methylocystis bryophila	1.60819
Roseomonas sp. 1318	1.60819
Streptococcus oralis	1.60819
Ottowia sp. 27C	1.59694
Agromyces sp. LHK192	1.5857
Burkholderia sp. THE68	1.5857
Comamonas serinivorans	1.5857
Dyella caseinilytica	1.5857
Massilia flava	1.5857
Mesorhizobium sp. M7A.F.Ce.TU.012.03.2.1	1.5857
Acidovorax sp. T1	1.5632
Rhizobium rhizoryzae	1.5632
Burkholderia sp. CCGE1003	1.55196
Ottowia oryzae	1.55196
Rhizobium lusitanum	1.55196
Roseomonas mucosa	1.55196
Salmonella enterica	1.55196
Sphingomonas daechungensis	1.55196
Ochrobactrum sp. MT180101	1.54071
Hydrogenophaga pseudoflava	1.52946
Rhizobium sp. ACO-34A	1.51822
Herbaspirillum seropedicae	1.50697
Janthinobacterium tructae	1.50697
Microbacterium endophyticum	1.50697
Burkholderia pyrrocinia	1.49573
Bradyrhizobium sp. 323S2	1.48448
Janthinobacterium sp. LM6	1.48448
Thiomonas sp. X19	1.48448
Citromicrobium sp. JL477	1.47323
Clostridioides difficile	1.47323
Collimonas fungivorans	1.47323
Plasmodium vinckei	1.47323
Rhizobium lentis	1.47323
Roseomonas gilardii	1.47323
Aeromonas hydrophila	1.46199
Comamonas sp. NLF-7-7	1.46199
Kocuria palustris	1.46199
Pseudomonas sp. K-62	1.46199
Acinetobacter ursingii	1.4395
Kocuria rhizophila	1.4395
Plasmodium chabaudi	1.4395
Acinetobacter indicus	1.42825
Acinetobacter haemolyticus	1.417
Neospora caninum	1.417
Plasmodium berghei	1.417
Rhizobium gallicum	1.417
Agrobacterium larrymoorei	1.40576
Burkholderia thailandensis	1.40576
Blautia sp. SC05B48	1.39451
Hoeflea sp. IMCC20628	1.39451
Hypericibacter adhaerens	1.39451
Priestia megaterium	1.39451
Variovorax sp. PBL-H6	1.39451
Paraburkholderia sp. PGU19	1.38327
Sphingomonas sp. YZ-8	1.38327
Staphylococcus xylosus	1.38327
Pseudonocardia dioxanivorans	1.37202
Streptomyces lividans	1.37202
Torque teno virus 18	1.37202
Burkholderia stagnalis	1.36077
Colletotrichum higginsianum	1.36077
Indioceanicola profundi	1.36077
Streptococcus pneumoniae	1.36077
Urbifossiella limnaea	1.36077
Diaphorobacter ruginosibacter	1.34953
Mycoplasma nasistruthionis	1.34953
Novosphingopyxis sp. PB63	1.34953
Prevotella melaninogenica	1.34953
Rothia mucilaginosa	1.34953
Thermothielavioides terrestris	1.34953
Torque teno virus 24	1.34953
Aureimonas sp. LMG 31693	1.33828
Erythrobacter litoralis	1.33828
Neorhizobium sp. SOG26	1.33828
Plasmodium vivax	1.33828
Pulveribacter suum	1.33828
Anaerostipes hadrus	1.32704
Bacillus thuringiensis	1.32704
Bacteroides thetaiotaomicron	1.32704
Bacteroides uniformis	1.32704
Massilia sp. CCM 8941	1.31579
Nordella sp. HKS 07	1.30454
Cupriavidus nantongensis	1.2933
Mesorhizobium opportunistum	1.2933
Mesorhizobium sp. 113-3-3	1.2933
Ochrobactrum quorumnocens	1.2933
Rhizobium sp. ADMK78	1.2933
Azospira restricta	1.28205
Dyella japonica	1.28205
Pandoraea norimbergensis	1.28205
Novosphingobium ginsenosidimutans	1.27081
Paraoceanicella profunda	1.27081
Roseitalea porphyridii	1.27081
Rathayibacter sp. VKM Ac-2760	1.25956
Rhizobium sp. CIAT894	1.25956
Variovorax sp. PBS-H4	1.25956
Mesorhizobium sp. M6A.T.Cr.TU.016.01.1.1	1.24831
Minicystis rosea	1.24831
Torque teno virus 29	1.24831
Herbaspirillum frisingense	1.23707
Methylosinus sp. C49	1.23707
Nitrospira moscoviensis	1.23707
Pseudomonas syringae	1.23707
Thermomonas brevis	1.23707
Aminobacter sp. SR38	1.22582
Janibacter indicus	1.22582
Mesorhizobium erdmanii	1.21457
Rhizobium favelukesii	1.21457
Variovorax boronicumulans	1.21457
Aureimonas populi	1.20333
Archangium violaceum	1.19208
Bifidobacterium breve	1.19208
Cryptococcus neoformans	1.19208
Ensifer sojae	1.19208
Parabacteroides distasonis	1.19208
Candidatus Accumulibacter phosphatis	1.18084
Denitratisoma oestradiolicum	1.18084
Dyella sp. G9	1.18084
Helicobacter pylori	1.18084
Nitratireductor sp. SY7	1.18084
Azospirillum sp. TSH100	1.16959
Drechmeria coniospora	1.16959
Duganella sp. AF9R3	1.16959
Lactococcus cremoris	1.16959
Rhizobium sp. NZLR1	1.16959
Agrobacterium rubi	1.15834
Jiangella alkaliphila	1.15834
Neurospora crassa	1.15834
Pochonia chlamydosporia	1.15834
Rhodoferax sp. AJA081-3	1.15834
Veillonella parvula	1.15834
Bacteroides ovatus	1.1471
Phenylobacterium parvum	1.1471
Burkholderia territorii	1.13585
Denitratisoma sp. DHT3	1.13585
Empedobacter falsenii	1.13585
Rhodococcus sp. 008	1.13585
Sinorhizobium americanum	1.13585
Chryseobacterium shandongense	1.12461
Mycolicibacterium chitae	1.12461
Pyricularia pennisetigena	1.12461
Roseococcus sp. NIBR12	1.12461
Neisseria subflava	1.11336
Sphingobacterium mizutaii	1.11336
Besnoitia besnoiti	1.10211
Mesorhizobium ciceri	1.10211
Neisseria sicca	1.10211
Polaribacter sp. G4M1	1.10211
Pseudomonas psychrotolerans	1.10211
Torque teno virus 13	1.10211
Agrobacterium fabrum	1.09087
Bacteroides eggerthii	1.09087
Corynebacterium ureicelerivorans	1.09087
Dietzia psychralcaliphila	1.09087
Gardnerella leopoldii	1.09087
Massilia sp. NR 4-1	1.09087
Neisseria mucosa	1.09087
Pyricularia grisea	1.09087
Blattabacterium sp. DPU	1.07962
Brevundimonas vancanneytii	1.07962
Lawsonella clevelandensis	1.07962
Torque teno virus 15	1.07962
Torque teno virus 22	1.07962
Undibacterium parvum	1.07962
Caballeronia sp. M1242	1.06838
Enterococcus faecalis	1.06838
Paracoccus jeotgali	1.06838
Torque teno virus 19	1.06838
Acidibrevibacterium fodinaquatile	1.05713
Acinetobacter pittii	1.05713
Azoarcus sp. DD4	1.05713
Massilia umbonata	1.05713
Paraburkholderia terrae	1.05713
Rhodobacter capsulatus	1.05713
Caenibius tardaugens	1.04588
Diaphorobacter sp. HDW4A	1.04588
Plasmodium coatneyi	1.04588
Roseburia intestinalis	1.04588
Sinorhizobium sp. BG8	1.04588
Acidovorax sp. HDW3	1.03464
Burkholderia ambifaria	1.03464
Clostridium beijerinckii	1.03464
Noviherbaspirillum sp. UKPF54	1.03464
Pseudomonas protegens	1.03464
Salipiger profundus	1.03464
Variovorax sp. SRS16	1.03464
Chryseobacterium taklimakanense	1.02339
Lysobacter solisilvae	1.02339
Massilia armeniaca	1.02339
Rhizobium binae	1.02339
Rhodospirillum rubrum	1.02339
Talaromyces rugulosus	1.02339
Acinetobacter dispersus	1.01215
Acinetobacter sp. FDAARGOS_724	1.01215
Ciceribacter thiooxidans	1.01215
Coprococcus comes	1.01215
Massilia violaceinigra	1.01215
Mesorhizobium sp. 113-3-9	1.01215
Ruminococcus torques	1.01215
Sandaracinobacter sp. M6	1.01215
Streptococcus sanguinis	1.01215
Devosia ginsengisoli	1.0009
Mycolicibacterium phocaicum	1.0009
Pseudoxanthomonas mexicana	1.0009
Rhodoferax ferrireducens	1.0009
Bacteroides caccae	0.989654
Croceicoccus naphthovorans	0.989654
Fannyhessea vaginae	0.989654
Fusobacterium pseudoperiodonticum	0.989654
Massilia lutea	0.989654
Ensifer alkalisoli	0.978408
Pelagovum pacificum	0.978408
Clostridium butyricum	0.967161
Nocardioides sp. S5	0.967161
Plasmodium cynomolgi	0.967161
Pseudomonas sp. ACM7	0.967161
Rhodoferax saidenbachensis	0.967161
Rhodovulum sp. P5	0.967161
Serpentinomonas mccroryi	0.967161
Aeromonas veronii	0.955915
Human betaherpesvirus 7	0.955915
Klebsiella aerogenes	0.955915
Klebsiella michiganensis	0.955915
Massilia plicata	0.955915
Niveispirillum cyanobacteriorum	0.955915
Pandoraea sp. XY-2	0.955915
Pseudomonas yamanorum	0.955915
Qipengyuania sediminis	0.955915
Vogesella sp. LIG4	0.955915
Lysobacter capsici	0.944669
Beijerinckia indica	0.933423
Enterobacter roggenkampii	0.933423
Gemella haemolysans	0.933423
Rhizobium daejeonense	0.933423
Rhizobium sp. WL3	0.933423
Rhodomicrobium vannielii	0.933423
Azospirillum thiophilum	0.922177
Corynebacterium kroppenstedtii	0.922177
Corynebacterium resistens	0.922177
Diaphorobacter sp. HDW4B	0.922177
Hydrogenophaga sp. PAMC20947	0.922177
Nocardioides aromaticivorans	0.922177
Pantoea ananatis	0.922177
Rhizobium bangladeshense	0.922177
Tabrizicola piscis	0.922177
Usitatibacter rugosus	0.922177
Hydrogenophaga sp. NH-16	0.910931
Janibacter limosus	0.910931
Paracoccus aminovorans	0.910931
Parvibaculum lavamentivorans	0.910931
Pseudomonas veronii	0.910931
Stappia sp. ES.058	0.910931
Acinetobacter seifertii	0.899685
Acinetobacter variabilis	0.899685
Caballeronia insecticola	0.899685
Hoeflea phototrophica	0.899685
Methyloligella sp. GL2	0.899685
Thauera sp. MZ1T	0.899685
Agrococcus jejuensis	0.888439
Candida albicans	0.888439
Candidatus Filomicrobium marinum	0.888439
Celeribacter indicus	0.888439
Cutibacterium avidum	0.888439
Dechloromonas sp. TW-R-39-2	0.888439
Delftia sp. Cs1-4	0.888439
Dermacoccus sp. PAMC28757	0.888439
Roseovarius indicus	0.888439
Rothia dentocariosa	0.888439
Schaalia odontolytica	0.888439
Simplicispira suum	0.888439
Tetrapisispora blattae	0.888439
Bacteroides xylanisolvens	0.877193
Blastomonas sp. RAC04	0.877193
Blautia obeum	0.877193
Bordetella genomosp. 8	0.877193
Dyella thiooxydans	0.877193
Lysobacter soli	0.877193
Nocardioides sp. JS614	0.877193
Streptococcus sp. oral taxon 061	0.877193
Acinetobacter sp. ACNIH1	0.865947
Acinetobacter towneri	0.865947
Agromyces sp. KACC 19306	0.865947
Brachybacterium saurashtrense	0.865947
Burkholderia seminalis	0.865947
Comamonas koreensis	0.865947
Devosia sp. S02	0.865947
Gordonia polyisoprenivorans	0.865947
Lachnospira eligens	0.865947
Lactococcus lactis	0.865947
Magnetospirillum sp. XM-1	0.865947
Salaquimonas pukyongi	0.865947
Staphylococcus warneri	0.865947
Stenotrophomonas sp. ESTM1D_MKCIP4_1	0.865947
Tsuneonella dongtanensis	0.865947
Acinetobacter guillouiae	0.854701
Brucella pseudogrignonensis	0.854701
Fusarium oxysporum	0.854701
Herbaspirillum sp. meg3	0.854701
Massilia sp. YMA4	0.854701
Mycobacteroides abscessus	0.854701
Mycolicibacterium mucogenicum	0.854701
Pandoraea thiooxydans	0.854701
Paradevosia shaoguanensis	0.854701
Acinetobacter gyllenbergii	0.843455
Actinomyces oris	0.843455
Candida dubliniensis	0.843455
Corynebacterium aurimucosum	0.843455
Cupriavidus sp. ISTL7	0.843455
Hyphomicrobium sp. MC1	0.843455
Paracoccus sp. BM15	0.843455
Paracoccus suum	0.843455
Pseudomonas entomophila	0.843455
Aspergillus fumigatus	0.832209
Burkholderia sp. Bp7605	0.832209
Clostridium innocuum	0.832209
Haliangium ochraceum	0.832209
Nocardioides sp. zg-1228	0.832209
Rothia aeria	0.832209
Sagittula sp. P11	0.832209
Sphingorhabdus lacus	0.832209
Xanthomonas campestris	0.832209
Azoarcus sp. CIB	0.820963
Devosia sp. I507	0.820963
Microterricola viridarii	0.820963
Rhizobium sp. NXC14	0.820963
Streptosporangium sp. 'caverna'	0.820963
Sulfitobacter pseudonitzschiae	0.820963
Agromyces flavus	0.809717
Azospirillum ramasamyi	0.809717
Haematobacter massiliensis	0.809717
Janthinobacterium sp. HH102	0.809717
Naumovozyma dairenensis	0.809717
Paracoccus denitrificans	0.809717
Pseudonocardia sp. CGMCC 4.1532	0.809717
Tetrapisispora phaffii	0.809717
Anaerobutyricum hallii	0.798471
Burkholderia sp. NRF60-BP8	0.798471
Collimonas pratensis	0.798471
Diaphorobacter aerolatus	0.798471
Janibacter melonis	0.798471
Massilia albidiflava	0.798471
Megamonas funiformis	0.798471
Pontivivens sp. MT2928	0.798471
Roseomonas sp. FDAARGOS_362	0.798471
Sandaracinus amylolyticus	0.798471
Archangium gephyra	0.787224
Bordetella genomosp. 9	0.787224
Brevibacterium linens	0.787224
Erythrobacter sp. HKB08	0.787224
Orrella dioscoreae	0.787224
Pyricularia oryzae	0.787224
Altererythrobacter epoxidivorans	0.775978
Azospirillum humicireducens	0.775978
Erythrobacter sp. HL-111	0.775978
Fusarium pseudograminearum	0.775978
Martelella sp. AD-3	0.775978
Plasmodium knowlesi	0.775978
Serpentinomonas raichei	0.775978
Acinetobacter nosocomialis	0.764732
Citrobacter freundii	0.764732
Defluviicoccus vanus	0.764732
Lactobacillus jensenii	0.764732
Lysobacter antibioticus	0.764732
Mesorhizobium sp. 113-1-2	0.764732
Mesorhizobium sp. L-8-3	0.764732
Nocardioides sp. CF8	0.764732
Porphyrobacter sp. HT-58-2	0.764732
Rathayibacter festucae	0.764732
Rhodococcus sp. BH4	0.764732
Skermanella pratensis	0.764732
Thalassiosira pseudonana	0.764732
Torque teno virus 12	0.764732
Aureimonas sp. OT7	0.753486
Bordetella bronchialis	0.753486
Candida orthopsilosis	0.753486
Celeribacter manganoxidans	0.753486
Fusarium venenatum	0.753486
Lautropia mirabilis	0.753486
Lichenicola cladoniae	0.753486
Martelella mediterranea	0.753486
Paracoccus sp. H4-D09	0.753486
Pseudomonas azotoformans	0.753486
Sphingorhabdus sp. M41	0.753486
Acinetobacter radioresistens	0.74224
Coprococcus catus	0.74224
Corynebacterium striatum	0.74224
Janthinobacterium lividum	0.74224
Luteimonas sp. YGD11-2	0.74224
Plasmodium reichenowi	0.74224
Pyruvatibacter mobilis	0.74224
Torque teno virus 10	0.74224
Azoarcus olearius	0.730994
Comamonas piscis	0.730994
Corynebacterium matruchotii	0.730994
Kluyveromyces marxianus	0.730994
Methylocystis sp. SC2	0.730994
Mycobacterium sp. YC-RL4	0.730994
Pararhodospirillum photometricum	0.730994
Plasmodium sp. gorilla clade G2	0.730994
Rhizobium flavum	0.730994
Stenotrophomonas acidaminiphila	0.730994
Thermomonas sp. XSG	0.730994
Ustilago maydis	0.730994
Azoarcus communis	0.719748
Janthinobacterium sp. 17J80-10	0.719748
Rhodoferax antarcticus	0.719748
Saccharomyces eubayanus	0.719748
Tsuneonella flava	0.719748
Bordetella sp. H567	0.708502
Candidatus Erwinia haradaeae	0.708502
Fusarium fujikuroi	0.708502
Human betaherpesvirus 6B	0.708502
Nocardioides sp. S-1144	0.708502
Nocardioides ungokensis	0.708502
Oryzomicrobium terrae	0.708502
Pigmentiphaga sp. H8	0.708502
Rhodobacter sp. CZR27	0.708502
Rhodobacter sp. LPB0142	0.708502
Streptococcus gordonii	0.708502
Variovorax sp. 38R	0.708502
Acinetobacter sp. MYb10	0.697256
Altererythrobacter sp. TH136	0.697256
Bordetella bronchiseptica	0.697256
Brevibacterium sp. CS2	0.697256
Brevirhabdus pacifica	0.697256
Comamonas kerstersii	0.697256
Gemmata obscuriglobus	0.697256
Hydrogenophilus thermoluteolus	0.697256
Oricola thermophila	0.697256
Paracoccus kondratievae	0.697256
Pseudomonas alkylphenolica	0.697256
Rhizobium sp. ZX09	0.697256
Tsuneonella amylolytica	0.697256
Bordetella petrii	0.68601
Chryseobacterium indologenes	0.68601
Corynebacterium sp. zg-917	0.68601
Micrococcus sp. KBS0714	0.68601
Peptoniphilus harei	0.68601
Sphingorhabdus sp. YGSMI21	0.68601
Sulfuritortus calidifontis	0.68601
Altererythrobacter sp. BO-6	0.674764
Bifidobacterium pseudocatenulatum	0.674764
Enterobacter hormaechei	0.674764
Enterococcus faecium	0.674764
Gemmatirosa kalamazoonesis	0.674764
Geodermatophilus obscurus	0.674764
Phaeobacter gallaeciensis	0.674764
Phocaeicola coprophilus	0.674764
Proteus mirabilis	0.674764
Pseudonocardia broussonetiae	0.674764
Rhizobium sp. NLR16a	0.674764
Rhodospirillum centenum	0.674764
Streptococcus sp. oral taxon 431	0.674764
Thermothelomyces thermophilus	0.674764
Aerosticca soli	0.663518
Amycolatopsis sp. YIM 10	0.663518
Azoarcus pumilus	0.663518
Candidatus Planktophila sulfonica	0.663518
Candidatus Thiodictyon syntrophicum	0.663518
Curtobacterium sp. 24E2	0.663518
Methylococcus sp. IM1	0.663518
Mycobacteroides chelonae	0.663518
Stenotrophomonas sp. SAU14A_NAIMI4_5	0.663518
Actinomadura sp. NAK00032	0.652272
Agromyces aureus	0.652272
Corynebacterium simulans	0.652272
Methyloceanibacter sp. wino2	0.652272
Nocardioides euryhalodurans	0.652272
Opitutus sp. GAS368	0.652272
Plasmodium gaboni	0.652272
Rhizobium sp. S41	0.652272
Streptomyces albus	0.652272
Tautonia plasticadhaerens	0.652272
Brachybacterium faecium	0.641026
Burkholderia sp. KK1	0.641026
Diaphorobacter polyhydroxybutyrativorans	0.641026
Frigoriglobus tundricola	0.641026
Mycolicibacterium anyangense	0.641026
Ornithinimicrobium pratense	0.641026
Schizosaccharomyces pombe	0.641026
Acidovorax citrulli	0.62978
Actinoplanes sp. OR16	0.62978
Amycolatopsis sp. FDAARGOS 1241	0.62978
Corallococcus coralloides	0.62978
Friedmanniella luteola	0.62978
Halomonas sp. 1513	0.62978
Mesorhizobium sp. 131-3-5	0.62978
Myxococcus xanthus	0.62978
Niastella koreensis	0.62978
Nocardioides sp. zg-579	0.62978
Polaribacter sp. KT25b	0.62978
Pseudomonas sp. ADAK13	0.62978
Stenotrophomonas sp. LM091	0.62978
Aromatoleum aromaticum	0.618534
Bordetella trematum	0.618534
Devosia sp. G19	0.618534
Human betaherpesvirus 6A	0.618534
Nocardioides humi	0.618534
Panacibacter ginsenosidivorans	0.618534
Pelagibaca abyssi	0.618534
Rhodococcus sp. AQ5-07	0.618534
Rothia kristinae	0.618534
Acidovorax cattleyae	0.607287
Agrobacterium sp. T29	0.607287
Agromyces sp. G127AT	0.607287
Amycolatopsis sp. AA4	0.607287
Bacteroides sp. HF-5287	0.607287
Bifidobacterium catenulatum	0.607287
Janthinobacterium sp. Marseille	0.607287
Labrenzia sp. THAF82	0.607287
Legionella pneumophila	0.607287
Marinovum algicola	0.607287
Niveibacterium sp. HC41	0.607287
Pandoraea fibrosis	0.607287
Pasteurella multocida	0.607287
Pimelobacter simplex	0.607287
Pseudomonas libanensis	0.607287
Pseudomonas synxantha	0.607287
Rhodanobacter denitrificans	0.607287
Rhodobacter blasticus	0.607287
Rubrobacter sp. SCSIO 52915	0.607287
Salinicola tamaricis	0.607287
Sphingobium sp. YBL2	0.607287
Streptomyces sp. TLI_053	0.607287
Thermomonas sp. SY21	0.607287
Xanthomonas citri	0.607287
Zymoseptoria tritici	0.607287
Burkholderia metallica	0.596041
Burkholderia sp. RPE67	0.596041
Cercospora beticola	0.596041
Erythrobacter aureus	0.596041
Lactobacillus gasseri	0.596041
Mycobacterium avium	0.596041
Nakamurella multipartita	0.596041
Nocardia brasiliensis	0.596041
Nocardioides sambongensis	0.596041
Pigmentiphaga aceris	0.596041
Porphyromonas asaccharolytica	0.596041
Qipengyuania seohaensis	0.596041
Streptomyces buecherae	0.596041
Streptomyces griseus	0.596041
Actinoplanes friuliensis	0.584795
Defluviimonas alba	0.584795
Gemmobacter sp. HYN0069	0.584795
Janibacter sp. YB324	0.584795
Labrenzia sp. VG12	0.584795
Limnohabitans sp. 63ED37-2	0.584795
Nocardia terpenica	0.584795
Nocardioides cynanchi	0.584795
Nocardioides sp. MC1495	0.584795
Pandoraea pulmonicola	0.584795
Paracoccus aminophilus	0.584795
Prochlorococcus marinus	0.584795
Rubrobacter sp. SCSIO 52909	0.584795
Saccharomyces cerevisiae	0.584795
Sulfuriferula plumbiphila	0.584795
Thioclava electrotropha	0.584795
Xanthomonas oryzae	0.584795
Altererythrobacter atlanticus	0.573549
Azospirillum baldaniorum	0.573549
Bacillus circulans	0.573549
Blastococcus saxobsidens	0.573549
Campylobacter concisus	0.573549
Frigoribacterium sp. NBH87	0.573549
Fusarium verticillioides	0.573549
Herbaspirillum hiltneri	0.573549
Morganella morganii	0.573549
Mycolicibacterium aurum	0.573549
Nocardioides anomalus	0.573549
Ornithinimicrobium sp. H23M54	0.573549
Saccharomonospora marina	0.573549
Sphingobacterium multivorum	0.573549
Streptomyces griseorubiginosus	0.573549
Torque teno virus 3	0.573549
Alistipes dispar	0.562303
Azoarcus sp. M9-3-2	0.562303
Corynebacterium riegelii	0.562303
Delftia sp. HK171	0.562303
Dialister massiliensis	0.562303
Dyella sp. M7H15-1	0.562303
Flavonifractor plautii	0.562303
Labilithrix luteola	0.562303
Lacticaseibacillus zeae	0.562303
Leishmania donovani	0.562303
Lysobacter sp. TY2-98	0.562303
Pandoraea oxalativorans	0.562303
Pantoea dispersa	0.562303
Parasphingopyxis sp. CP4	0.562303
Pseudomonas graminis	0.562303
Rhodanobacter sp. FDAARGOS 1247	0.562303
Rhodococcus opacus	0.562303
Streptococcus salivarius	0.562303
Streptomyces spectabilis	0.562303
Variovorax sp. PBL-E5	0.562303
Acinetobacter soli	0.551057
Azoarcus sp. KH32C	0.551057
Blastomonas fulva	0.551057
Cedecea neteri	0.551057
Clostridium pasteurianum	0.551057
Cryptosporidium parvum	0.551057
Devosia sp. LEGU1	0.551057
Enterocloster bolteae	0.551057
Modestobacter marinus	0.551057
Nocardioides sp. S-713	0.551057
Planococcus massiliensis	0.551057
Streptomyces rimosus	0.551057
Streptomyces sp. SAT1	0.551057
Tardiphaga sp. vice304	0.551057
Amycolatopsis albispora	0.539811
Conexibacter woesei	0.539811
Curvibacter sp. AEP1-3	0.539811
Dietzia sp. oral taxon 368	0.539811
Limnoglobus roseus	0.539811
Lysobacter arenosi	0.539811
Lysobacter gummosus	0.539811
Methyloversatilis sp. RAC08	0.539811
Nocardioides dokdonensis	0.539811
Nocardioides mesophilus	0.539811
Nonomuraea nitratireducens	0.539811
Nonomuraea sp. ATCC 55076	0.539811
Parabacteroides goldsteinii	0.539811
Saccharothrix syringae	0.539811
Streptomyces seoulensis	0.539811
Sulfurivermis fontis	0.539811
Thauera humireducens	0.539811
Tsukamurella paurometabola	0.539811
Actinomadura verrucosospora	0.528565
Azospirillum sp. TSA2s	0.528565
Dermabacter jinjuensis	0.528565
Komagataeibacter xylinus	0.528565
Leishmania infantum	0.528565
Luteibacter pinisoli	0.528565
Paraburkholderia acidophila	0.528565
Porphyrobacter sp. LM 6	0.528565
Providencia rettgeri	0.528565
Pseudomonas trivialis	0.528565
Pseudonocardia autotrophica	0.528565
Streptomyces dengpaensis	0.528565
Torque teno virus 11	0.528565
Youhaiella tibetensis	0.528565
Acinetobacter venetianus	0.517319
Actinomyces sp. oral taxon 169	0.517319
Actinomyces sp. oral taxon 414	0.517319
Bordetella sp. N	0.517319
Gordonia sp. KTR9	0.517319
Halarcobacter ebronensis	0.517319
Leisingera methylohalidivorans	0.517319
Mycobacterium grossiae	0.517319
Naumovozyma castellii	0.517319
Nocardia cyriacigeorgica	0.517319
Roseicitreum antarcticum	0.517319
Sinorhizobium medicae	0.517319
Staphylococcus saprophyticus	0.517319
Streptococcus cristatus	0.517319
Streptococcus thermophilus	0.517319
Streptomyces niveus	0.517319
Thiomonas intermedia	0.517319
Torque teno virus	0.517319
Xanthomonas translucens	0.517319
Acidovorax ebreus	0.506073
Brenneria goodwinii	0.506073
Curtobacterium pusillum	0.506073
Dechloromonas aromatica	0.506073
Devosia sp. 1566	0.506073
Epidermidibacterium keratini	0.506073
Leisingera aquaemixtae	0.506073
Lelliottia amnigena	0.506073
Mesorhizobium sp. L-8-10	0.506073
Microlunatus sagamiharensis	0.506073
Neisseria elongata	0.506073
Nocardioides seonyuensis	0.506073
Nocardioides sp. HDW12B	0.506073
Paraflavitalea soli	0.506073
Pelagerythrobacter marensis	0.506073
Protaetiibacter intestinalis	0.506073
Pseudomonas denitrificans (nom. rej.)	0.506073
Pseudomonas sp. FDAARGOS_380	0.506073
Rheinheimera sp. LHK132	0.506073
Ureaplasma parvum	0.506073
Aminobacter aminovorans	0.494827
Blautia producta	0.494827
Burkholderia vietnamiensis	0.494827
Catenulispora acidiphila	0.494827
Citricoccus sp. SGAir0253	0.494827
Clostridium sp. DL-VIII	0.494827
Conexibacter sp. SYSU D00693	0.494827
Fusobacterium varium	0.494827
Leptospira interrogans	0.494827
Leptotrichia wadei	0.494827
Lysobacter oculi	0.494827
Mesorhizobium sp. WSM1497	0.494827
Micromonospora sp. WMMA2032	0.494827
Mobiluncus curtisii	0.494827
Nocardioides sp. HDW12A	0.494827
Odoribacter splanchnicus	0.494827
Ottowia sp. oral taxon 894	0.494827
Pandoraea apista	0.494827
Pandoraea vervacti	0.494827
Saccharopolyspora erythraea	0.494827
Streptomyces glomeroaurantiacus	0.494827
Streptomyces sp. NHF165	0.494827
Amycolatopsis sp. Hca4	0.483581
Bacillus mycoides	0.483581
Bacteroides cellulosilyticus	0.483581
Burkholderia oklahomensis	0.483581
Castellaniella defragrans	0.483581
Corynebacterium minutissimum	0.483581
Fusobacterium ulcerans	0.483581
Haemophilus influenzae	0.483581
Luteimonas chenhongjianii	0.483581
Magnetospirillum gryphiswaldense	0.483581
Magnetospirillum magneticum	0.483581
Megasphaera elsdenii	0.483581
Melittangium boletus	0.483581
Mycolicibacterium phlei	0.483581
Paeniclostridium sordellii	0.483581
Prevotella denticola	0.483581
Pseudomonas luteola	0.483581
Pseudomonas sp. 02C 26	0.483581
Pseudomonas sp. PDNC002	0.483581
Rhodococcus fascians	0.483581
Roseibacterium elongatum	0.483581
Ruminococcus bicirculans	0.483581
Ruthenibacterium lactatiformans	0.483581
Streptomyces olivoreticuli	0.483581
Acinetobacter sp. WCHA45	0.472335
Agrococcus sp. SGAir0287	0.472335
Aromatoleum bremense	0.472335
Azoarcus sp. DN11	0.472335
Bordetella flabilis	0.472335
Clostridium kluyveri	0.472335
Corynebacterium sanguinis	0.472335
Janthinobacterium sp. PLB02	0.472335
Labrenzia alexandrii	0.472335
Leclercia adecarboxylata	0.472335
Mammaliicoccus sciuri	0.472335
Methyloceanibacter caenitepidi	0.472335
Mycolicibacterium gilvum	0.472335
Nocardioides sp. 603	0.472335
Phycicoccus sp. HDW14	0.472335
Prevotella jejuni	0.472335
Prevotella sp. oral taxon 299	0.472335
Pseudomonas extremaustralis	0.472335
Pseudomonas fragi	0.472335
Rhizobium indicum	0.472335
Rhodoferax sp. PAMC29310	0.472335
Roseburia hominis	0.472335
Stenotrophomonas sp. 364	0.472335
Streptomyces katrae	0.472335
Streptomyces paludis	0.472335
Torque teno virus 5	0.472335
Bacillus pseudomycoides	0.461089
Bacteroides sp. CBA7301	0.461089
Celeribacter ethanolicus	0.461089
Cellulophaga lytica	0.461089
Enterococcus cecorum	0.461089
Immundisolibacter cernigliae	0.461089
Klebsiella quasipneumoniae	0.461089
Luteitalea pratensis	0.461089
Nocardioides houyundeii	0.461089
Sphingobacterium spiritivorum	0.461089
Sutterella wadsworthensis	0.461089
Torque teno virus 16	0.461089
Xanthomonas fragariae	0.461089
Acidiphilium multivorum	0.449843
Aliarcobacter butzleri	0.449843
Aliarcobacter cryaerophilus	0.449843
Alistipes onderdonkii	0.449843
Aquisphaera giovannonii	0.449843
Brachybacterium ginsengisoli	0.449843
Corynebacterium glucuronolyticum	0.449843
Cryptococcus gattii VGI	0.449843
Diaphorobacter sp. JS3050	0.449843
Dokdonella koreensis	0.449843
Hyphobacterium sp. CCMP332	0.449843
Kazachstania africana	0.449843
Labrenzia sp. PHM005	0.449843
Lentzea guizhouensis	0.449843
Microbacterium sp. SGAir0570	0.449843
Micromonospora krabiensis	0.449843
Micromonospora zamorensis	0.449843
Nocardioides marinisabuli	0.449843
Oceanicola sp. D3	0.449843
Pseudomonas arsenicoxydans	0.449843
Pseudomonas orientalis	0.449843
Pseudomonas sp. ATCC 13867	0.449843
Pseudomonas sp. SCB32	0.449843
Pyxidicoccus sp. SCPEA002	0.449843
Rhodanobacter glycinis	0.449843
Saccharothrix espanaensis	0.449843
Streptococcus pyogenes	0.449843
Streptomyces sp. NA02950	0.449843
Thauera hydrothermalis	0.449843
Torque teno virus 20	0.449843
Usitatibacter palustris	0.449843
Xanthomonas hyacinthi	0.449843
Acidaminococcus intestini	0.438596
Acidovorax sp. JS42	0.438596
Actinomadura sp. WMMA1423	0.438596
Actinomadura sp. WMMB 499	0.438596
Actinomyces sp. oral taxon 171	0.438596
Actinoplanes derwentensis	0.438596
Advenella kashmirensis	0.438596
Akkermansia muciniphila	0.438596
Azospira sp. I09	0.438596
Bacillus subtilis	0.438596
Bacteroides sp. A1C1	0.438596
Corynebacterium singulare	0.438596
Croceicoccus sp. YJ47	0.438596
Debaryomyces hansenii	0.438596
Dickeya zeae	0.438596
Flavobacterium johnsoniae	0.438596
Mannheimia haemolytica	0.438596
Martelella lutilitoris	0.438596
Microlunatus phosphovorus	0.438596
Micromonospora carbonacea	0.438596
Neoasaia chiangmaiensis	0.438596
Phytohabitans flavus	0.438596
Pseudomonas sp. DG56-2	0.438596
Rhizobium acidisoli	0.438596
Rhodovulum sulfidophilum	0.438596
Salinisphaera sp. LB1	0.438596
Sphingopyxis sp. MG	0.438596
Streptomyces chartreusis	0.438596
Streptomyces vietnamensis	0.438596
Terricaulis silvestris	0.438596
Xanthomonas cucurbitae	0.438596
Yarrowia lipolytica	0.438596
Actinomarinicola tropica	0.42735
Actinomyces naeslundii	0.42735
Alistipes shahii	0.42735
Aromatoleum petrolei	0.42735
Bernardetia litoralis	0.42735
Brevibacterium luteolum	0.42735
Burkholderia sp. JP2-270	0.42735
Chromobacterium violaceum	0.42735
Clostridium septicum	0.42735
Corynebacterium diphtheriae	0.42735
Deinococcus wulumuqiensis	0.42735
Gordonia bronchialis	0.42735
Herminiimonas arsenitoxidans	0.42735
Kitasatospora sp. MMS16-BH015	0.42735
Luteimonas granuli	0.42735
Lysobacter sp. H23M41	0.42735
Mameliella alba	0.42735
Mesorhizobium sp. AA22	0.42735
Mesorhizobium sp. M2A.F.Ca.ET.043.02.1.1	0.42735
Micromonospora siamensis	0.42735
Micromonospora sp. WMMC415	0.42735
Mycobacterium gordonae	0.42735
Neobacillus cucumis	0.42735
Pandoraea faecigallinarum	0.42735
Parvimonas micra	0.42735
Pelagibacterium halotolerans	0.42735
Pseudobacter ginsenosidimutans	0.42735
Salipiger pacificus	0.42735
Stigmatella aurantiaca	0.42735
Streptococcus suis	0.42735
Streptomyces sp. SCUT-3	0.42735
Thauera chlorobenzoica	0.42735
Theileria annulata	0.42735
Actinomyces sp. HMT 175	0.416104
Actinoplanes sp. N902-109	0.416104
Actinoplanes teichomyceticus	0.416104
Aeribacillus pallidus	0.416104
Aeromonas salmonicida	0.416104
Aquitalea aquatilis	0.416104
Bifidobacterium thermophilum	0.416104
Brachybacterium sp. SGAir0954	0.416104
Butyricimonas virosa	0.416104
Cardiobacterium hominis	0.416104
Chromobacterium vaccinii	0.416104
Clostridium baratii	0.416104
Devosia sp. D6-9	0.416104
Dietzia lutea	0.416104
Elizabethkingia anophelis	0.416104
Epibacterium mobile	0.416104
Gemella sanguinis	0.416104
Halotalea alkalilenta	0.416104
Kutzneria albida	0.416104
Ligilactobacillus salivarius	0.416104
Pedobacter cryoconitis	0.416104
Phaeobacter piscinae	0.416104
Phycicoccus endophyticus	0.416104
Pseudomonas plecoglossicida	0.416104
Pseudomonas umsongensis	0.416104
Saccharopolyspora coralli	0.416104
Serratia plymuthica	0.416104
Streptomyces globisporus	0.416104
Streptomyces mobaraensis	0.416104
Torque teno virus 27	0.416104
Actinopolymorpha singaporensis	0.404858
Alistipes communis	0.404858
Anaeromyxobacter sp. Fw109-5	0.404858
Arthrobacter sp. NEB 688	0.404858
Azotobacter chroococcum	0.404858
Azotobacter salinestris	0.404858
Burkholderia diffusa	0.404858
Campylobacter pinnipediorum	0.404858
Cellulomonas gilvus	0.404858
Chryseobacterium indoltheticum	0.404858
Corynebacterium amycolatum	0.404858
Corynebacterium imitans	0.404858
Corynebacterium macginleyi	0.404858
Deinococcus actinosclerus	0.404858
Desulfovibrio desulfuricans	0.404858
Flavobacterium columnare	0.404858
Haemophilus haemolyticus	0.404858
Haliscomenobacter hydrossis	0.404858
Lacibacter sp. S13-6-6	0.404858
Lactobacillus helveticus	0.404858
Lactococcus piscium	0.404858
Lysobacter maris	0.404858
Microbacterium paraoxydans	0.404858
Micromonospora sp. 28ISP2-46	0.404858
Mycolicibacterium fortuitum	0.404858
Nocardioides daphniae	0.404858
Paraurantiacibacter namhicola	0.404858
Polynucleobacter necessarius	0.404858
Pseudolysobacter antarcticus	0.404858
Pseudomonas cichorii	0.404858
Pseudomonas sp. R5-89-07	0.404858
Pseudomonas viridiflava	0.404858
Saccharomyces paradoxus	0.404858
Serinicoccus chungangensis	0.404858
Staphylococcus lugdunensis	0.404858
Staphylococcus pasteuri	0.404858
Sterolibacterium denitrificans	0.404858
Streptomyces lydicus	0.404858
Streptomyces sp. So13.3	0.404858
Sugiyamaella lignohabitans	0.404858
Sulfitobacter sp. D7	0.404858
Sulfitobacter sp. THAF37	0.404858
Sulfurifustis variabilis	0.404858
Thioclava nitratireducens	0.404858
Torque teno virus 28	0.404858
Vitreoscilla filiformis	0.404858
Xanthomonas sacchari	0.404858
Acinetobacter wuhouensis	0.393612
Agrococcus carbonis	0.393612
Alistipes finegoldii	0.393612
Brachyspira hyodysenteriae	0.393612
Burkholderia sp. BDU8	0.393612
Candida glabrata	0.393612
Capnocytophaga sputigena	0.393612
Clostridium saccharobutylicum	0.393612
Clostridium saccharoperbutylacetonicum	0.393612
Clostridium scindens	0.393612
Cupriavidus neocaledonicus	0.393612
Erythrobacter sp. 6D36	0.393612
Geosporobacter ferrireducens	0.393612
Jiangella sp. DSM 45060	0.393612
Kocuria flava	0.393612
Luteimonas yindakuii	0.393612
Marmoricola scoriae	0.393612
Microvirgula aerodenitrificans	0.393612
Miniimonas sp. S16	0.393612
Paenibacillus polymyxa	0.393612
Pseudomonas marincola	0.393612
Pseudomonas sp. Leaf58	0.393612
Pseudonocardia sp. HH130630-07	0.393612
Pseudoxanthomonas spadix	0.393612
Rathayibacter sp. VKM Ac-2804	0.393612
Rhodococcus sp. X156	0.393612
Stackebrandtia nassauensis	0.393612
Stenotrophomonas sp. G4	0.393612
Streptacidiphilus sp. PB12-B1b	0.393612
Theileria parva	0.393612
Vibrio anguillarum	0.393612
Yangia sp. CCB-MM3	0.393612
Agromyces protaetiae	0.382366
Amycolatopsis keratiniphila	0.382366
Amycolatopsis mediterranei	0.382366
Blautia argi	0.382366
Burkholderia sp. PAMC 26561	0.382366
Chroococcidiopsis thermalis	0.382366
Clostridium hylemonae	0.382366
Clostridium intestinale	0.382366
Clostridium tetani	0.382366
Cystobacter fuscus	0.382366
Dinoroseobacter shibae	0.382366
Euzebya sp. DY32-46	0.382366
Prevotella enoeca	0.382366
Pseudomonas sp. CMR5c	0.382366
Pusillimonas sp. T7-7	0.382366
Stenotrophomonas sp. WZN-1	0.382366
Streptococcus pseudopneumoniae	0.382366
Streptomyces sp. SN-593	0.382366
Veillonella atypica	0.382366
Actinotalea sp. JY-7876	0.37112
Aerococcus christensenii	0.37112
Aeromicrobium chenweiae	0.37112
Aeromonas dhakensis	0.37112
Aeromonas media	0.37112
Amycolatopsis sp. BJA-103	0.37112
Burkholderia sp. BDU6	0.37112
Burkholderia sp. LA-2-3-30-S1-D2	0.37112
Deinococcus ficus	0.37112
Ehrlichia ruminantium	0.37112
Erysipelatoclostridium ramosum	0.37112
Erythrobacter mangrovi	0.37112
Erythrobacter sp. KY5	0.37112
Kocuria rosea	0.37112
Lacunisphaera limnophila	0.37112
Laribacter hongkongensis	0.37112
Luteimonas sp. MC1750	0.37112
Micromonospora tulbaghiae	0.37112
Nocardia sp. CS682	0.37112
Nocardiopsis alba	0.37112
Prevotella scopos	0.37112
Proteus vulgaris	0.37112
Pseudomonas sp. ADAK18	0.37112
Pseudomonas sp. S-6-2	0.37112
Rhodococcus hoagii	0.37112
Rhodococcus sp. B7740	0.37112
Rhodococcus sp. PBTS 1	0.37112
Rugosibacter aromaticivorans	0.37112
Solimonas sp. K1W22B-7	0.37112
Steroidobacter denitrificans	0.37112
Streptococcus sp. 116-D4	0.37112
Streptomyces alboniger	0.37112
Streptosporangium roseum	0.37112
Sulfurimicrobium lacus	0.37112
Tenacibaculum jejuense	0.37112
Thalassospira sp. A40-3	0.37112
Theileria orientalis	0.37112
Acetobacter aceti	0.359874
Acidihalobacter ferrooxydans	0.359874
Actinoplanes missouriensis	0.359874
Allokutzneria albata	0.359874
Aquimarina sp. BL5	0.359874
Brachyspira pilosicoli	0.359874
Burkholderia sp. MS455	0.359874
Campylobacter ureolyticus	0.359874
Clostridium argentinense	0.359874
Cnuibacter physcomitrellae	0.359874
Congregibacter litoralis	0.359874
Cryobacterium arcticum	0.359874
Curtobacterium flaccumfaciens	0.359874
Curtobacterium sp. YC1	0.359874
Desulfobulbus oralis	0.359874
Desulfovibrio ferrophilus	0.359874
Erwinia gerundensis	0.359874
Granulibacter bethesdensis	0.359874
Isoptericola dokdonensis	0.359874
Jeongeupia sp. USM3	0.359874
Lactobacillus johnsonii	0.359874
Lactobacillus paragasseri	0.359874
Limnohabitans sp. 103DPR2	0.359874
Listeria monocytogenes	0.359874
Lysobacter lycopersici	0.359874
Micropruina glycogenica	0.359874
Nocardioides sp. JQ2195	0.359874
Octadecabacter arcticus	0.359874
Protaetiibacter sp. SSC-01	0.359874
Pseudomonas corrugata	0.359874
Pseudonocardia sp. AL041005-10	0.359874
Pusillimonas thiosulfatoxidans	0.359874
Rathayibacter sp. VKM Ac-2801	0.359874
Staphylococcus simulans	0.359874
Stenotrophomonas sp. ASS1	0.359874
Streptomyces albulus	0.359874
Streptomyces clavuligerus	0.359874
Streptomyces rectiverticillatus	0.359874
Streptomyces sp. Go-475	0.359874
Synechococcus sp. JA-2-3B'a(2-13)	0.359874
Thiobacillus denitrificans	0.359874
Torque teno virus 8	0.359874
Winogradskyella forsetii	0.359874
Agromyces badenianii	0.348628
Antarctobacter heliothermus	0.348628
Arcobacter nitrofigilis	0.348628
Baekduia soli	0.348628
Blautia hansenii	0.348628
Brachybacterium sp. P6-10-X1	0.348628
Burkholderia sp. MSMB0856	0.348628
Burkholderia sp. PAMC 28687	0.348628
Carnobacterium maltaromaticum	0.348628
Cellulomonas sp. Y8	0.348628
Deinococcus metallilatus	0.348628
Desulfovibrio fairfieldensis	0.348628
Flavobacterium sp. 140616W15	0.348628
Frankia sp. EAN1pec	0.348628
Lacrimispora saccharolytica	0.348628
Methanosarcina barkeri	0.348628
Mycetohabitans rhizoxinica	0.348628
Mycolicibacterium frederiksbergense	0.348628
Mycolicibacterium sediminis	0.348628
Neisseria flavescens	0.348628
Neisseria meningitidis	0.348628
Nissabacter sp. SGAir0207	0.348628
Nocardia farcinica	0.348628
Nocardia nova	0.348628
Oscillatoria nigro-viridis	0.348628
Prevotella oris	0.348628
Pseudomonas sp. BJP69	0.348628
Pseudomonas sp. StFLB209	0.348628
Rhodococcus koreensis	0.348628
Shewanella algae	0.348628
Silicimonas algicola	0.348628
Stenotrophomonas sp. 169	0.348628
Stenotrophomonas sp. NA06056	0.348628
Streptococcus anginosus	0.348628
Streptomyces broussonetiae	0.348628
Sulfuricaulis limicola	0.348628
Acinetobacter oleivorans	0.337382
Acinetobacter sp. 10FS3-1	0.337382
Acinetobacter sp. ACNIH2	0.337382
Acinetobacter sp. LoGeW2-3	0.337382
Acinetobacter sp. SWBY1	0.337382
Anaerococcus prevotii	0.337382
Arthrobacter agilis	0.337382
Arthrobacter alpinus	0.337382
Beutenbergia cavernae	0.337382
Bifidobacterium dentium	0.337382
Bordetella avium	0.337382
Brachyspira hampsonii	0.337382
Chryseobacterium manosquense	0.337382
Cohaesibacter sp. ES.047	0.337382
Confluentimicrobium sp. EMB200-NS6	0.337382
Corynebacterium genitalium	0.337382
Deinococcus geothermalis	0.337382
Eubacterium sp. NSJ-61	0.337382
Filimonas lacunae	0.337382
Frondihabitans sp. PAMC 28766	0.337382
Fusobacterium hwasookii	0.337382
Intrasporangium calvum	0.337382
Leptolyngbya boryana	0.337382
Leucobacter triazinivorans	0.337382
Lysinibacillus fusiformis	0.337382
Marinicauda algicola	0.337382
Micromonospora auratinigra	0.337382
Mycolicibacterium litorale	0.337382
Nocardioides sp. WS12	0.337382
Octadecabacter temperatus	0.337382
Paenibacillus durus	0.337382
Pantoea agglomerans	0.337382
Phytohabitans suffuscus	0.337382
Prevotella dentalis	0.337382
Pseudomonas granadensis	0.337382
Pseudomonas sp. 14181154	0.337382
Pseudonocardia sp. HH130629-09	0.337382
Rhizobium sp. Kim5	0.337382
Serinicoccus profundi	0.337382
Sphingobacterium sp. UDSM-2020	0.337382
Streptomyces armeniacus	0.337382
Streptomyces collinus	0.337382
Streptomyces globosus	0.337382
Streptomyces sp. fd1-xmd	0.337382
Streptomyces sp. GS7	0.337382
Streptomyces sp. HM190	0.337382
Tetrasphaera sp. HKS02	0.337382
Ureaplasma urealyticum	0.337382
Vibrio cholerae	0.337382
Vibrio parahaemolyticus	0.337382
Acinetobacter calcoaceticus	0.326136
Aeromicrobium marinum	0.326136
Agromyces sp. HY052	0.326136
Alkaliphilus metalliredigens	0.326136
Amycolatopsis methanolica	0.326136
Burkholderia sp. IDO3	0.326136
Campylobacter jejuni	0.326136
Chitinophaga pinensis	0.326136
Chromohalobacter salexigens	0.326136
Citrobacter werkmanii	0.326136
Clostridium sp. CT4	0.326136
Corallococcus macrosporus	0.326136
Corynebacterium timonense	0.326136
Corynebacterium vitaeruminis	0.326136
Corynebacterium xerosis	0.326136
Enterococcus avium	0.326136
Frankia sp. QA3	0.326136
Gottschalkia acidurici	0.326136
Halomonas socia	0.326136
Humibacter sp. BT305	0.326136
Intestinimonas butyriciproducens	0.326136
Kosakonia sacchari	0.326136
Lactobacillus amylovorus	0.326136
Moorea producens	0.326136
Mycolicibacterium tokaiense	0.326136
Pandoraea sputorum	0.326136
Phocaeicola salanitronis	0.326136
Photobacterium damselae	0.326136
Prevotella fusca	0.326136
Pseudomonas brassicacearum	0.326136
Pseudomonas sp. J380	0.326136
Ruminiclostridium herbifermentans	0.326136
Sebaldella termitidis	0.326136
Sedimentibacter sp. zth1	0.326136
Shewanella decolorationis	0.326136
Shewanella putrefaciens	0.326136
Streptomyces bingchenggensis	0.326136
Streptomyces galilaeus	0.326136
Streptomyces tsukubensis	0.326136
Tardiphaga sp. vice278	0.326136
Acinetobacter sp. WCHA55	0.31489
Aeromicrobium choanae	0.31489
Aquimarina sp. AD10	0.31489
Auraticoccus monumenti	0.31489
Bacillus pumilus	0.31489
Caldibacillus thermoamylovorans	0.31489
Calothrix parasitica	0.31489
Campylobacter lari	0.31489
Chondromyces crocatus	0.31489
Clostridium sp. JN-1	0.31489
Corynebacterium glaucum	0.31489
Crenobacter cavernae	0.31489
Deinococcus swuensis	0.31489
Dolosigranulum pigrum	0.31489
Empedobacter brevis	0.31489
Erwinia amylovora	0.31489
Erythrobacter sp. THAF29	0.31489
Flammeovirga sp. MY04	0.31489
Klebsiella oxytoca	0.31489
Klebsiella variicola	0.31489
Leptotrichia sp. oral taxon 212	0.31489
Luteimonas sp. MC1572	0.31489
Lysinibacillus sphaericus	0.31489
Marinobacterium aestuarii	0.31489
Paraclostridium bifermentans	0.31489
Peptacetobacter hiranonis	0.31489
Persicimonas caeni	0.31489
Pichia kudriavzevii	0.31489
Porphyromonas gingivalis	0.31489
Rhodococcus ruber	0.31489
Rhodococcus triatomae	0.31489
Romboutsia ilealis	0.31489
Roseovarius sp. THAF9	0.31489
Saccharothrix sp. 6-C	0.31489
Shewanella sp. LZH-2	0.31489
Streptacidiphilus sp. P02-A3a	0.31489
Streptococcus sp. A12	0.31489
Streptomyces harbinensis	0.31489
Streptomyces nodosus	0.31489
Streptomyces sp. CRPJ-33	0.31489
Streptomyces sp. CRXT-G-22	0.31489
Thermomonas carbonis	0.31489
Tissierellia sp. JN-28	0.31489
Torque teno virus 6	0.31489
Treponema denticola	0.31489
Veillonella nakazawae	0.31489
Weizmannia coagulans	0.31489
Acinetobacter sp. TTH0-4	0.303644
Altererythrobacter sp. ZODW24	0.303644
Anaerocolumna cellulosilytica	0.303644
Azospirillum oryzae	0.303644
Azotobacter vinelandii	0.303644
Bacteroides intestinalis	0.303644
Bartonella apis	0.303644
Brachybacterium vulturis	0.303644
Brevibacillus brevis	0.303644
Chitinimonas arctica	0.303644
Chryseobacterium arthrosphaerae	0.303644
Chryseobacterium gleum	0.303644
Chryseobacterium sp. NEB161	0.303644
Clostridium taeniosporum	0.303644
Coprobacter sp. 2CBH44	0.303644
Eremothecium cymbalariae	0.303644
Flavobacterium sp. SLB02	0.303644
Gordonia insulae	0.303644
Jannaschia sp. CCS1	0.303644
Jeongeupia sp. HS-3	0.303644
Luteimonas sp. JM171	0.303644
Lysobacter alkalisoli	0.303644
Micromonospora purpureochromogenes	0.303644
Mycolicibacterium psychrotolerans	0.303644
Nocardioides sp. dk884	0.303644
Nocardioides sp. ZJ1313	0.303644
Olsenella umbonata	0.303644
Paenibacillus sp. FSL H7-0737	0.303644
Paludisphaera borealis	0.303644
Pedobacter heparinus	0.303644
Planctomyces sp. SH-PL14	0.303644
Planctomyces sp. SH-PL62	0.303644
Pluralibacter gergoviae	0.303644
Pseudomonas koreensis	0.303644
Pseudomonas moraviensis	0.303644
Pseudomonas rhizosphaerae	0.303644
Pseudomonas salegens	0.303644
Pseudomonas sp. MPC6	0.303644
Pseudomonas sp. SNU WT1	0.303644
Pseudopuniceibacterium antarcticum	0.303644
Rhodococcus sp. H-CA8f	0.303644
Rhodococcus sp. MTM3W5.2	0.303644
Riemerella anatipestifer	0.303644
Rothia amarae	0.303644
Staphylococcus sp. 11-B-312	0.303644
Streptococcus australis	0.303644
Streptomyces alboflavus	0.303644
Streptomyces qinzhouensis	0.303644
Streptomyces sp. 2323.1	0.303644
Thermomonas sp. HDW16	0.303644
Tsuneonella mangrovi	0.303644
Xanthomonas theicola	0.303644
Zygotorulaspora mrakii	0.303644
Acinetobacter sp. WCHAc010034	0.292398
Actinomyces viscosus	0.292398
Actinosynnema pretiosum	0.292398
Aggregatibacter aphrophilus	0.292398
Agrobacterium sp. MA01	0.292398
Agrobacterium sp. RAC06	0.292398
Aquimarina sp. AD1	0.292398
Aurantiacibacter gangjinensis	0.292398
Burkholderia pseudomultivorans	0.292398
Campylobacter hominis	0.292398
Candidatus Nitrotoga sp. AM1P	0.292398
Candidatus Solibacter usitatus	0.292398
Capnocytophaga canimorsus	0.292398
Cellulomonas fimi	0.292398
Coprococcus sp. ART55/1	0.292398
Deinococcus sp. AJ005	0.292398
Erythrobacter sp. A30-3	0.292398
Flammeovirga pectinis	0.292398
Flavobacterium crocinum	0.292398
Fusobacterium necrophorum	0.292398
Kineococcus radiotolerans	0.292398
Kitasatospora setae	0.292398
Kurthia sp. 11kri321	0.292398
Lactiplantibacillus plantarum	0.292398
Limnobacter sp. SAORIC-580	0.292398
Lysobacter sp. CW239	0.292398
Malaciobacter molluscorum	0.292398
Meiothermus silvanus	0.292398
Micromonospora coxensis	0.292398
Micromonospora echinaurantiaca	0.292398
Mycobacterium kubicae	0.292398
Mycolicibacterium parafortuitum	0.292398
Myroides odoratus	0.292398
Nocardia seriolae	0.292398
[truncated: 5,121 more rows]
