# Supplementary material for: No evidence for a common blood microbiome based on a population study of 9,770 healthy humans
Source: bioRxiv preprint, doi:10.1101/2022.07.29.502098, version 2 (2022-12-04)
Supplement: Supplementary Table 6 [file 502098_file12.xlsx]

## Sheet: Supplementary Table 6
Sample ID	Cohort name	Extraction kit type	Library preparation kit type	HiSeq XTM SBS Kit 300 cycles box 1 lot number	HiSeq XTM SBS Kit 300 cycles box 2 lot number	PE Cluster Kit box 1 lot number	PE Cluster Kit box 2 lot number	Flow cell lot number
WHB10000	HELIOS	abGENIX Whole Blood Genomic DNA Extraction Kit	NEBNext UltraII DNA library Prep Kit for Illumina	20363558	20364085	20356806	20364080	20347587
WHB10001	HELIOS	abGENIX Whole Blood Genomic DNA Extraction Kit	NEBNext UltraII DNA library Prep Kit for Illumina	20363558	20364085	20356806	20364080	20347587
WHB10002	HELIOS	abGENIX Whole Blood Genomic DNA Extraction Kit	NEBNext UltraII DNA library Prep Kit for Illumina	20363558	20364085	20348434	20364080	20347583
WHB10003	HELIOS	abGENIX Whole Blood Genomic DNA Extraction Kit	NEBNext UltraII DNA library Prep Kit for Illumina	20363558	20364085	20348434	20364080	20347583
WHB10005	HELIOS	abGENIX Whole Blood Genomic DNA Extraction Kit	NEBNext UltraII DNA library Prep Kit for Illumina	20363558	20364085	20348434	20364080	20347583
WHB10006	HELIOS	abGENIX Whole Blood Genomic DNA Extraction Kit	NEBNext UltraII DNA library Prep Kit for Illumina	20363558	20364085	20348434	20364080	20347583
WHB10008	HELIOS	abGENIX Whole Blood Genomic DNA Extraction Kit	NEBNext UltraII DNA library Prep Kit for Illumina	20363558	20364085	20348434	20364080	20347583
WHB10009	HELIOS	abGENIX Whole Blood Genomic DNA Extraction Kit	NEBNext UltraII DNA library Prep Kit for Illumina	20363558	20364085	20348434	20364080	20347583
WHB10010	HELIOS	abGENIX Whole Blood Genomic DNA Extraction Kit	NEBNext UltraII DNA library Prep Kit for Illumina	20363558	20364085	20348434	20364080	20347583
WHB10011	HELIOS	abGENIX Whole Blood Genomic DNA Extraction Kit	NEBNext UltraII DNA library Prep Kit for Illumina	20363558	20364085	20348434	20364080	20347583
WHB10012	HELIOS	abGENIX Whole Blood Genomic DNA Extraction Kit	NEBNext UltraII DNA library Prep Kit for Illumina	20363558	20364085	20348434	20364080	20347583
WHB10013	HELIOS	abGENIX Whole Blood Genomic DNA Extraction Kit	NEBNext UltraII DNA library Prep Kit for Illumina	20363558	20364085	20348434	20364080	20347583
WHB10014	HELIOS	abGENIX Whole Blood Genomic DNA Extraction Kit	NEBNext UltraII DNA library Prep Kit for Illumina	20363558	20364085	20348434	20364080	20347583
WHB10015	HELIOS	abGENIX Whole Blood Genomic DNA Extraction Kit	NEBNext UltraII DNA library Prep Kit for Illumina	20363558	20364085	20348434	20364080	20347583
WHB10018	HELIOS	abGENIX Whole Blood Genomic DNA Extraction Kit	NEBNext UltraII DNA library Prep Kit for Illumina	20363558	20364085	20348434	20364080	20347583
WHB10019	HELIOS	abGENIX Whole Blood Genomic DNA Extraction Kit	NEBNext UltraII DNA library Prep Kit for Illumina	20363558	20364085	20348434	20364080	20347583
WHB10020	HELIOS	abGENIX Whole Blood Genomic DNA Extraction Kit	NEBNext UltraII DNA library Prep Kit for Illumina	20363558	20364085	20348434	20364080	20347583
WHB10024	HELIOS	abGENIX Whole Blood Genomic DNA Extraction Kit	NEBNext UltraII DNA library Prep Kit for Illumina	20363558	20364085	20348434	20364080	20347583
WHB10025	HELIOS	abGENIX Whole Blood Genomic DNA Extraction Kit	NEBNext UltraII DNA library Prep Kit for Illumina	20363558	20364085	20348434	20364080	20347583
WHB10026	HELIOS	abGENIX Whole Blood Genomic DNA Extraction Kit	NEBNext UltraII DNA library Prep Kit for Illumina	20363558	20364085	20356806	20364080	20347583
WHB10027	HELIOS	abGENIX Whole Blood Genomic DNA Extraction Kit	NEBNext UltraII DNA library Prep Kit for Illumina	20363558	20364085	20356806	20364080	20347583
WHB10028	HELIOS	abGENIX Whole Blood Genomic DNA Extraction Kit	NEBNext UltraII DNA library Prep Kit for Illumina	20363558	20364085	20356806	20364080	20347583
WHB10031	HELIOS	abGENIX Whole Blood Genomic DNA Extraction Kit	NEBNext UltraII DNA library Prep Kit for Illumina	20363558	20364085	20356806	20364080	20347583
WHB10034	HELIOS	abGENIX Whole Blood Genomic DNA Extraction Kit	NEBNext UltraII DNA library Prep Kit for Illumina	20363558	20364085	20356806	20364080	20347583
WHB10035	HELIOS	abGENIX Whole Blood Genomic DNA Extraction Kit	NEBNext UltraII DNA library Prep Kit for Illumina	20363558	20364085	20356806	20364080	20347583
WHB10037	HELIOS	abGENIX Whole Blood Genomic DNA Extraction Kit	NEBNext UltraII DNA library Prep Kit for Illumina	20363558	20364085	20356806	20364080	20347583
WHB10038	HELIOS	abGENIX Whole Blood Genomic DNA Extraction Kit	NEBNext UltraII DNA library Prep Kit for Illumina	20363558	20364085	20356806	20364080	20347583
WHB10039	HELIOS	abGENIX Whole Blood Genomic DNA Extraction Kit	NEBNext UltraII DNA library Prep Kit for Illumina	20363558	20364085	20356806	20364080	20347583
WHB10041	HELIOS	abGENIX Whole Blood Genomic DNA Extraction Kit	NEBNext UltraII DNA library Prep Kit for Illumina	20363558	20364085	20356806	20364080	20347583
WHB10042	HELIOS	abGENIX Whole Blood Genomic DNA Extraction Kit	NEBNext UltraII DNA library Prep Kit for Illumina	20363558	20364085	20356806	20364080	20347583
WHB10043	HELIOS	abGENIX Whole Blood Genomic DNA Extraction Kit	NEBNext UltraII DNA library Prep Kit for Illumina	20363558	20364085	20356806	20364080	20347583
WHB10044	HELIOS	abGENIX Whole Blood Genomic DNA Extraction Kit	NEBNext UltraII DNA library Prep Kit for Illumina	20363558	20364085	20356806	20364080	20347583
WHB10045	HELIOS	abGENIX Whole Blood Genomic DNA Extraction Kit	NEBNext UltraII DNA library Prep Kit for Illumina	20363558	20364085	20356806	20364080	20347583
WHB10046	HELIOS	abGENIX Whole Blood Genomic DNA Extraction Kit	NEBNext UltraII DNA library Prep Kit for Illumina	20363558	20364085	20356806	20364080	20347583
WHB10047	HELIOS	abGENIX Whole Blood Genomic DNA Extraction Kit	NEBNext UltraII DNA library Prep Kit for Illumina	20374156	20364588	20357599	20364082	20347589
WHB10048	HELIOS	abGENIX Whole Blood Genomic DNA Extraction Kit	NEBNext UltraII DNA library Prep Kit for Illumina	20363558	20364588	20357599	20371249	20347589
WHB10049	HELIOS	abGENIX Whole Blood Genomic DNA Extraction Kit	NEBNext UltraII DNA library Prep Kit for Illumina	20363558	20364085	20356806	20364080	20347583
WHB10052	HELIOS	abGENIX Whole Blood Genomic DNA Extraction Kit	NEBNext UltraII DNA library Prep Kit for Illumina	20363558	20364085	20356806	20364080	20347583
WHB10053	HELIOS	abGENIX Whole Blood Genomic DNA Extraction Kit	NEBNext UltraII DNA library Prep Kit for Illumina	20363558	20364588	20357599	20371249	20347589
WHB10054	HELIOS	abGENIX Whole Blood Genomic DNA Extraction Kit	NEBNext UltraII DNA library Prep Kit for Illumina	20363558	20364588	20357599	20371249	20347589
WHB10055	HELIOS	abGENIX Whole Blood Genomic DNA Extraction Kit	NEBNext UltraII DNA library Prep Kit for Illumina	20374156	20364588	20357599	20364082	20347589
WHB10056	HELIOS	abGENIX Whole Blood Genomic DNA Extraction Kit	NEBNext UltraII DNA library Prep Kit for Illumina	20364059	20374150	20356807	20364082	20350041
WHB10057	HELIOS	abGENIX Whole Blood Genomic DNA Extraction Kit	NEBNext UltraII DNA library Prep Kit for Illumina	20363558	20364588	20357599	20371249	20347589
WHB10058	HELIOS	abGENIX Whole Blood Genomic DNA Extraction Kit	NEBNext UltraII DNA library Prep Kit for Illumina	20374156	20364588	20357599	20364082	20347589
WHB10059	HELIOS	abGENIX Whole Blood Genomic DNA Extraction Kit	NEBNext UltraII DNA library Prep Kit for Illumina	20364059	20374150	20356807	20364082	20350041
WHB10061	HELIOS	abGENIX Whole Blood Genomic DNA Extraction Kit	NEBNext UltraII DNA library Prep Kit for Illumina	20363558	20364588	20357599	20371249	20347589
WHB10062	HELIOS	abGENIX Whole Blood Genomic DNA Extraction Kit	NEBNext UltraII DNA library Prep Kit for Illumina	20363558	20364588	20357599	20371249	20347589
WHB10063	HELIOS	abGENIX Whole Blood Genomic DNA Extraction Kit	NEBNext UltraII DNA library Prep Kit for Illumina	20363558	20364588	20357599	20371249	20347589
WHB10064	HELIOS	abGENIX Whole Blood Genomic DNA Extraction Kit	NEBNext UltraII DNA library Prep Kit for Illumina	20364059	20374150	20356807	20364082	20350041
WHB10065	HELIOS	abGENIX Whole Blood Genomic DNA Extraction Kit	NEBNext UltraII DNA library Prep Kit for Illumina	20363558	20364588	20357599	20371249	20347589
WHB10068	HELIOS	abGENIX Whole Blood Genomic DNA Extraction Kit	NEBNext UltraII DNA library Prep Kit for Illumina	20363558	20364588	20357599	20371249	20347589
WHB10069	HELIOS	abGENIX Whole Blood Genomic DNA Extraction Kit	NEBNext UltraII DNA library Prep Kit for Illumina	20364059	20374150	20356807	20364082	20350041
WHB10070	HELIOS	abGENIX Whole Blood Genomic DNA Extraction Kit	NEBNext UltraII DNA library Prep Kit for Illumina	20363558	20364588	20357599	20371249	20347589
WHB10071	HELIOS	abGENIX Whole Blood Genomic DNA Extraction Kit	NEBNext UltraII DNA library Prep Kit for Illumina	20364059	20364588	20348434	20364080	20347589
WHB10072	HELIOS	abGENIX Whole Blood Genomic DNA Extraction Kit	NEBNext UltraII DNA library Prep Kit for Illumina	20374156	20364588	20357599	20364082	20347589
WHB10073	HELIOS	abGENIX Whole Blood Genomic DNA Extraction Kit	NEBNext UltraII DNA library Prep Kit for Illumina	20364059	20364588	20348434	20364080	20347589
WHB10074	HELIOS	abGENIX Whole Blood Genomic DNA Extraction Kit	NEBNext UltraII DNA library Prep Kit for Illumina	20364059	20364588	20348434	20364080	20347589
WHB10075	HELIOS	abGENIX Whole Blood Genomic DNA Extraction Kit	NEBNext UltraII DNA library Prep Kit for Illumina	20364059	20364588	20348434	20364080	20347589
WHB10076	HELIOS	abGENIX Whole Blood Genomic DNA Extraction Kit	NEBNext UltraII DNA library Prep Kit for Illumina	20364059	20364588	20348434	20364080	20347589
WHB10077	HELIOS	abGENIX Whole Blood Genomic DNA Extraction Kit	NEBNext UltraII DNA library Prep Kit for Illumina	20364059	20364588	20348434	20364080	20347589
WHB10078	HELIOS	abGENIX Whole Blood Genomic DNA Extraction Kit	NEBNext UltraII DNA library Prep Kit for Illumina	20374156	20364588	20357599	20364082	20347589
WHB10079	HELIOS	abGENIX Whole Blood Genomic DNA Extraction Kit	NEBNext UltraII DNA library Prep Kit for Illumina	20364059	20364588	20348434	20364080	20347589
WHB10080	HELIOS	abGENIX Whole Blood Genomic DNA Extraction Kit	NEBNext UltraII DNA library Prep Kit for Illumina	20374156	20364588	20357599	20364082	20347589
WHB10081	HELIOS	abGENIX Whole Blood Genomic DNA Extraction Kit	NEBNext UltraII DNA library Prep Kit for Illumina	20374156	20364588	20357599	20364082	20347589
WHB10082	HELIOS	abGENIX Whole Blood Genomic DNA Extraction Kit	NEBNext UltraII DNA library Prep Kit for Illumina	20374156	20364588	20357599	20364082	20347589
WHB10083	HELIOS	abGENIX Whole Blood Genomic DNA Extraction Kit	NEBNext UltraII DNA library Prep Kit for Illumina	20374156	20364588	20357599	20364082	20347589
WHB10084	HELIOS	abGENIX Whole Blood Genomic DNA Extraction Kit	NEBNext UltraII DNA library Prep Kit for Illumina	20364059	20364588	20348434	20364080	20347589
WHB10085	HELIOS	abGENIX Whole Blood Genomic DNA Extraction Kit	NEBNext UltraII DNA library Prep Kit for Illumina	20374156	20364588	20357599	20364082	20347589
WHB10086	HELIOS	abGENIX Whole Blood Genomic DNA Extraction Kit	NEBNext UltraII DNA library Prep Kit for Illumina	20364059	20364588	20348434	20364080	20347589
WHB10087	HELIOS	abGENIX Whole Blood Genomic DNA Extraction Kit	NEBNext UltraII DNA library Prep Kit for Illumina	20364059	20364588	20348434	20364080	20347589
WHB10089	HELIOS	abGENIX Whole Blood Genomic DNA Extraction Kit	NEBNext UltraII DNA library Prep Kit for Illumina	20374156	20364588	20357599	20364082	20347589
WHB10090	HELIOS	abGENIX Whole Blood Genomic DNA Extraction Kit	NEBNext UltraII DNA library Prep Kit for Illumina	20374156	20364588	20357599	20364082	20347589
WHB10092	HELIOS	abGENIX Whole Blood Genomic DNA Extraction Kit	NEBNext UltraII DNA library Prep Kit for Illumina	20374156	20364588	20357599	20364082	20347589
WHB10093	HELIOS	abGENIX Whole Blood Genomic DNA Extraction Kit	NEBNext UltraII DNA library Prep Kit for Illumina	20364059	20364588	20348434	20364080	20347589
WHB10094	HELIOS	abGENIX Whole Blood Genomic DNA Extraction Kit	NEBNext UltraII DNA library Prep Kit for Illumina	20374156	20364588	20357599	20364082	20347589
WHB10095	HELIOS	abGENIX Whole Blood Genomic DNA Extraction Kit	NEBNext UltraII DNA library Prep Kit for Illumina	20374156	20364588	20357599	20364082	20347589
WHB10096	HELIOS	abGENIX Whole Blood Genomic DNA Extraction Kit	NEBNext UltraII DNA library Prep Kit for Illumina	20374156	20364588	20357599	20364082	20347589
WHB10097	HELIOS	abGENIX Whole Blood Genomic DNA Extraction Kit	NEBNext UltraII DNA library Prep Kit for Illumina	20374156	20364588	20357599	20364082	20347589
WHB10099	HELIOS	abGENIX Whole Blood Genomic DNA Extraction Kit	NEBNext UltraII DNA library Prep Kit for Illumina	20364059	20364742	20356807	20364082	20347589
WHB10100	HELIOS	abGENIX Whole Blood Genomic DNA Extraction Kit	NEBNext UltraII DNA library Prep Kit for Illumina	20364059	20364742	20356807	20364082	20347589
WHB10101	HELIOS	abGENIX Whole Blood Genomic DNA Extraction Kit	NEBNext UltraII DNA library Prep Kit for Illumina	20364059	20364742	20356807	20364082	20347589
WHB10102	HELIOS	abGENIX Whole Blood Genomic DNA Extraction Kit	NEBNext UltraII DNA library Prep Kit for Illumina	20364059	20364742	20356807	20364082	20347589
WHB10104	HELIOS	abGENIX Whole Blood Genomic DNA Extraction Kit	NEBNext UltraII DNA library Prep Kit for Illumina	20364059	20364742	20356807	20364082	20347589
WHB10105	HELIOS	abGENIX Whole Blood Genomic DNA Extraction Kit	NEBNext UltraII DNA library Prep Kit for Illumina	20364059	20364742	20356807	20364082	20347589
WHB10106	HELIOS	abGENIX Whole Blood Genomic DNA Extraction Kit	NEBNext UltraII DNA library Prep Kit for Illumina	20374156	20374149	20350208	20364081	20347589
WHB10107	HELIOS	abGENIX Whole Blood Genomic DNA Extraction Kit	NEBNext UltraII DNA library Prep Kit for Illumina	20364059	20364588	20348434	20364080	20347589
WHB10108	HELIOS	abGENIX Whole Blood Genomic DNA Extraction Kit	NEBNext UltraII DNA library Prep Kit for Illumina	20364059	20364742	20356807	20364082	20347589
WHB10109	HELIOS	abGENIX Whole Blood Genomic DNA Extraction Kit	NEBNext UltraII DNA library Prep Kit for Illumina	20364059	20364588	20348434	20364080	20347589
WHB10110	HELIOS	abGENIX Whole Blood Genomic DNA Extraction Kit	NEBNext UltraII DNA library Prep Kit for Illumina	20364059	20364588	20348434	20364080	20347589
WHB10111	HELIOS	abGENIX Whole Blood Genomic DNA Extraction Kit	NEBNext UltraII DNA library Prep Kit for Illumina	20364059	20364742	20356807	20364082	20347589
WHB10112	HELIOS	abGENIX Whole Blood Genomic DNA Extraction Kit	NEBNext UltraII DNA library Prep Kit for Illumina	20364059	20364742	20356807	20364082	20347589
WHB10113	HELIOS	abGENIX Whole Blood Genomic DNA Extraction Kit	NEBNext UltraII DNA library Prep Kit for Illumina	20364059	20364742	20356807	20364082	20347589
WHB10114	HELIOS	abGENIX Whole Blood Genomic DNA Extraction Kit	NEBNext UltraII DNA library Prep Kit for Illumina	20364059	20364742	20356807	20364082	20347589
WHB10116	HELIOS	abGENIX Whole Blood Genomic DNA Extraction Kit	NEBNext UltraII DNA library Prep Kit for Illumina	20364059	20364742	20356807	20364082	20347589
WHB10117	HELIOS	abGENIX Whole Blood Genomic DNA Extraction Kit	NEBNext UltraII DNA library Prep Kit for Illumina	20364059	20364742	20356807	20364082	20347589
WHB10118	HELIOS	abGENIX Whole Blood Genomic DNA Extraction Kit	NEBNext UltraII DNA library Prep Kit for Illumina	20364059	20364742	20356807	20364082	20347589
WHB10119	HELIOS	abGENIX Whole Blood Genomic DNA Extraction Kit	NEBNext UltraII DNA library Prep Kit for Illumina	20364059	20364588	20348434	20364080	20347589
WHB10120	HELIOS	abGENIX Whole Blood Genomic DNA Extraction Kit	NEBNext UltraII DNA library Prep Kit for Illumina	20364059	20364742	20356807	20364082	20347589
WHB10121	HELIOS	abGENIX Whole Blood Genomic DNA Extraction Kit	NEBNext UltraII DNA library Prep Kit for Illumina	20364059	20364742	20356807	20364082	20347589
WHB10122	HELIOS	abGENIX Whole Blood Genomic DNA Extraction Kit	NEBNext UltraII DNA library Prep Kit for Illumina	20364059	20374150	20356807	20364082	20350041
WHB10123	HELIOS	abGENIX Whole Blood Genomic DNA Extraction Kit	NEBNext UltraII DNA library Prep Kit for Illumina	20364059	20374150	20356807	20364082	20350041
WHB10124	HELIOS	abGENIX Whole Blood Genomic DNA Extraction Kit	NEBNext UltraII DNA library Prep Kit for Illumina	20374156	20374149	20350208	20364081	20347589
WHB10125	HELIOS	abGENIX Whole Blood Genomic DNA Extraction Kit	NEBNext UltraII DNA library Prep Kit for Illumina	20364059	20374150	20356807	20364082	20350041
WHB10126	HELIOS	abGENIX Whole Blood Genomic DNA Extraction Kit	NEBNext UltraII DNA library Prep Kit for Illumina	20364059	20374150	20356807	20364082	20350041
WHB10127	HELIOS	abGENIX Whole Blood Genomic DNA Extraction Kit	NEBNext UltraII DNA library Prep Kit for Illumina	20364059	20374150	20356807	20364082	20350041
WHB10128	HELIOS	abGENIX Whole Blood Genomic DNA Extraction Kit	NEBNext UltraII DNA library Prep Kit for Illumina	20364059	20364742	20356807	20364082	20347589
WHB10129	HELIOS	abGENIX Whole Blood Genomic DNA Extraction Kit	NEBNext UltraII DNA library Prep Kit for Illumina	20364059	20374150	20356807	20364082	20350041
WHB10130	HELIOS	abGENIX Whole Blood Genomic DNA Extraction Kit	NEBNext UltraII DNA library Prep Kit for Illumina	20364059	20374150	20356807	20364082	20350041
WHB10131	HELIOS	abGENIX Whole Blood Genomic DNA Extraction Kit	NEBNext UltraII DNA library Prep Kit for Illumina	20364059	20374150	20356807	20364082	20350041
WHB10132	HELIOS	abGENIX Whole Blood Genomic DNA Extraction Kit	NEBNext UltraII DNA library Prep Kit for Illumina	20364059	20364588	20356807	20364081	20350041
WHB10133	HELIOS	abGENIX Whole Blood Genomic DNA Extraction Kit	NEBNext UltraII DNA library Prep Kit for Illumina	20364059	20364588	20356807	20364081	20350041
WHB10135	HELIOS	abGENIX Whole Blood Genomic DNA Extraction Kit	NEBNext UltraII DNA library Prep Kit for Illumina	20364059	20374150	20356807	20364082	20350041
WHB10136	HELIOS	abGENIX Whole Blood Genomic DNA Extraction Kit	NEBNext UltraII DNA library Prep Kit for Illumina	20364059	20364588	20348434	20364080	20347589
WHB10137	HELIOS	abGENIX Whole Blood Genomic DNA Extraction Kit	NEBNext UltraII DNA library Prep Kit for Illumina	20364059	20364588	20348434	20364080	20347589
WHB10138	HELIOS	abGENIX Whole Blood Genomic DNA Extraction Kit	NEBNext UltraII DNA library Prep Kit for Illumina	20364059	20364588	20348434	20364080	20347589
WHB10139	HELIOS	abGENIX Whole Blood Genomic DNA Extraction Kit	NEBNext UltraII DNA library Prep Kit for Illumina	20364059	20364588	20348434	20364080	20347589
WHB10140	HELIOS	abGENIX Whole Blood Genomic DNA Extraction Kit	NEBNext UltraII DNA library Prep Kit for Illumina	20364059	20364588	20348434	20364080	20347589
WHB10141	HELIOS	abGENIX Whole Blood Genomic DNA Extraction Kit	NEBNext UltraII DNA library Prep Kit for Illumina	20363559	20364588	20357599	20364080	20347589
WHB10142	HELIOS	abGENIX Whole Blood Genomic DNA Extraction Kit	NEBNext UltraII DNA library Prep Kit for Illumina	20363559	20364588	20357599	20371249	20347589
WHB10143	HELIOS	abGENIX Whole Blood Genomic DNA Extraction Kit	NEBNext UltraII DNA library Prep Kit for Illumina	20363559	20364588	20357599	20371249	20347589
WHB10144	HELIOS	abGENIX Whole Blood Genomic DNA Extraction Kit	NEBNext UltraII DNA library Prep Kit for Illumina	20363559	20364588	20357599	20364080	20347589
WHB10145	HELIOS	abGENIX Whole Blood Genomic DNA Extraction Kit	NEBNext UltraII DNA library Prep Kit for Illumina	20363559	20364588	20357599	20371249	20347589
WHB10146	HELIOS	abGENIX Whole Blood Genomic DNA Extraction Kit	NEBNext UltraII DNA library Prep Kit for Illumina	20363559	20364588	20357599	20371249	20347589
WHB10147	HELIOS	abGENIX Whole Blood Genomic DNA Extraction Kit	NEBNext UltraII DNA library Prep Kit for Illumina	20363559	20364588	20357599	20364080	20347589
WHB10148	HELIOS	abGENIX Whole Blood Genomic DNA Extraction Kit	NEBNext UltraII DNA library Prep Kit for Illumina	20363559	20364588	20357599	20371249	20347589
WHB10149	HELIOS	abGENIX Whole Blood Genomic DNA Extraction Kit	NEBNext UltraII DNA library Prep Kit for Illumina	20363559	20364588	20357599	20371249	20347589
WHB10150	HELIOS	abGENIX Whole Blood Genomic DNA Extraction Kit	NEBNext UltraII DNA library Prep Kit for Illumina	20363559	20364588	20357599	20371249	20347589
WHB10151	HELIOS	abGENIX Whole Blood Genomic DNA Extraction Kit	NEBNext UltraII DNA library Prep Kit for Illumina	20363559	20364588	20357599	20371249	20347589
WHB10153	HELIOS	abGENIX Whole Blood Genomic DNA Extraction Kit	NEBNext UltraII DNA library Prep Kit for Illumina	20364059	20364588	20356807	20364081	20350041
WHB10154	HELIOS	abGENIX Whole Blood Genomic DNA Extraction Kit	NEBNext UltraII DNA library Prep Kit for Illumina	20363559	20364588	20357599	20364080	20347589
WHB10155	HELIOS	abGENIX Whole Blood Genomic DNA Extraction Kit	NEBNext UltraII DNA library Prep Kit for Illumina	20363559	20364588	20357599	20371249	20347589
WHB10156	HELIOS	abGENIX Whole Blood Genomic DNA Extraction Kit	NEBNext UltraII DNA library Prep Kit for Illumina	20363559	20364588	20357599	20371249	20347589
WHB10157	HELIOS	abGENIX Whole Blood Genomic DNA Extraction Kit	NEBNext UltraII DNA library Prep Kit for Illumina	20363559	20364588	20357599	20371249	20347589
WHB10158	HELIOS	abGENIX Whole Blood Genomic DNA Extraction Kit	NEBNext UltraII DNA library Prep Kit for Illumina	20363559	20364588	20357599	20371249	20347589
WHB10160	HELIOS	abGENIX Whole Blood Genomic DNA Extraction Kit	NEBNext UltraII DNA library Prep Kit for Illumina	20374156	20374149	20350208	20364081	20347589
WHB10161	HELIOS	abGENIX Whole Blood Genomic DNA Extraction Kit	NEBNext UltraII DNA library Prep Kit for Illumina	20363559	20364588	20357599	20364080	20347589
WHB10162	HELIOS	abGENIX Whole Blood Genomic DNA Extraction Kit	NEBNext UltraII DNA library Prep Kit for Illumina	20363559	20364588	20357599	20364080	20347589
WHB10163	HELIOS	abGENIX Whole Blood Genomic DNA Extraction Kit	NEBNext UltraII DNA library Prep Kit for Illumina	20363559	20364588	20357599	20364080	20347589
WHB10164	HELIOS	abGENIX Whole Blood Genomic DNA Extraction Kit	NEBNext UltraII DNA library Prep Kit for Illumina	20363559	20364588	20357599	20364080	20347589
WHB10165	HELIOS	abGENIX Whole Blood Genomic DNA Extraction Kit	NEBNext UltraII DNA library Prep Kit for Illumina	20363559	20364588	20357599	20371249	20347589
WHB10166	HELIOS	abGENIX Whole Blood Genomic DNA Extraction Kit	NEBNext UltraII DNA library Prep Kit for Illumina	20363559	20364588	20357599	20371249	20347589
WHB10167	HELIOS	abGENIX Whole Blood Genomic DNA Extraction Kit	NEBNext UltraII DNA library Prep Kit for Illumina	20372370	20364588	20357599	20364080	20347589
WHB10168	HELIOS	abGENIX Whole Blood Genomic DNA Extraction Kit	NEBNext UltraII DNA library Prep Kit for Illumina	20372370	20364588	20357599	20364080	20347589
WHB10169	HELIOS	abGENIX Whole Blood Genomic DNA Extraction Kit	NEBNext UltraII DNA library Prep Kit for Illumina	20363559	20364588	20357599	20364080	20347589
WHB10170	HELIOS	abGENIX Whole Blood Genomic DNA Extraction Kit	NEBNext UltraII DNA library Prep Kit for Illumina	20372370	20364588	20357599	20364080	20347589
WHB10171	HELIOS	abGENIX Whole Blood Genomic DNA Extraction Kit	NEBNext UltraII DNA library Prep Kit for Illumina	20372370	20364588	20357599	20364080	20347589
WHB10172	HELIOS	abGENIX Whole Blood Genomic DNA Extraction Kit	NEBNext UltraII DNA library Prep Kit for Illumina	20363559	20364588	20357599	20364080	20347589
WHB10173	HELIOS	abGENIX Whole Blood Genomic DNA Extraction Kit	NEBNext UltraII DNA library Prep Kit for Illumina	20372370	20364588	20357599	20364080	20347589
WHB10174	HELIOS	abGENIX Whole Blood Genomic DNA Extraction Kit	NEBNext UltraII DNA library Prep Kit for Illumina	20372370	20364588	20357599	20364080	20347589
WHB10175	HELIOS	abGENIX Whole Blood Genomic DNA Extraction Kit	NEBNext UltraII DNA library Prep Kit for Illumina	20372370	20364588	20357599	20364080	20347589
WHB10176	HELIOS	abGENIX Whole Blood Genomic DNA Extraction Kit	NEBNext UltraII DNA library Prep Kit for Illumina	20363559	20364588	20357599	20364080	20347589
WHB10177	HELIOS	abGENIX Whole Blood Genomic DNA Extraction Kit	NEBNext UltraII DNA library Prep Kit for Illumina	20372370	20364588	20357599	20364080	20347589
WHB10178	HELIOS	abGENIX Whole Blood Genomic DNA Extraction Kit	NEBNext UltraII DNA library Prep Kit for Illumina	20372370	20364588	20357599	20364080	20347589
WHB10179	HELIOS	abGENIX Whole Blood Genomic DNA Extraction Kit	NEBNext UltraII DNA library Prep Kit for Illumina	20372370	20364588	20357599	20364080	20347589
WHB10180	HELIOS	abGENIX Whole Blood Genomic DNA Extraction Kit	NEBNext UltraII DNA library Prep Kit for Illumina	20372370	20364588	20357599	20364080	20347589
WHB10181	HELIOS	abGENIX Whole Blood Genomic DNA Extraction Kit	NEBNext UltraII DNA library Prep Kit for Illumina	20372370	20364588	20357599	20364080	20347589
WHB10183	HELIOS	abGENIX Whole Blood Genomic DNA Extraction Kit	NEBNext UltraII DNA library Prep Kit for Illumina	20372370	20364588	20357599	20364080	20347589
WHB10184	HELIOS	abGENIX Whole Blood Genomic DNA Extraction Kit	NEBNext UltraII DNA library Prep Kit for Illumina	20372370	20364588	20357599	20364080	20347589
WHB10185	HELIOS	abGENIX Whole Blood Genomic DNA Extraction Kit	NEBNext UltraII DNA library Prep Kit for Illumina	20372370	20364588	20357599	20364080	20347589
WHB10186	HELIOS	abGENIX Whole Blood Genomic DNA Extraction Kit	NEBNext UltraII DNA library Prep Kit for Illumina	20372370	20364588	20357599	20364080	20347589
WHB10187	HELIOS	abGENIX Whole Blood Genomic DNA Extraction Kit	NEBNext UltraII DNA library Prep Kit for Illumina	20372370	20364588	20357599	20364080	20347589
WHB10188	HELIOS	abGENIX Whole Blood Genomic DNA Extraction Kit	NEBNext UltraII DNA library Prep Kit for Illumina	20372370	20364588	20357599	20364080	20347589
WHB10189	HELIOS	abGENIX Whole Blood Genomic DNA Extraction Kit	NEBNext UltraII DNA library Prep Kit for Illumina	20363559	20372230	20357599	20364080	20347589
WHB10190	HELIOS	abGENIX Whole Blood Genomic DNA Extraction Kit	NEBNext UltraII DNA library Prep Kit for Illumina	20372370	20364588	20357599	20364080	20347589
WHB10191	HELIOS	abGENIX Whole Blood Genomic DNA Extraction Kit	NEBNext UltraII DNA library Prep Kit for Illumina	20363559	20372230	20357599	20364080	20347589
WHB10192	HELIOS	abGENIX Whole Blood Genomic DNA Extraction Kit	NEBNext UltraII DNA library Prep Kit for Illumina	20363559	20372230	20357599	20364080	20347589
WHB10193	HELIOS	abGENIX Whole Blood Genomic DNA Extraction Kit	NEBNext UltraII DNA library Prep Kit for Illumina	20363559	20372230	20357599	20364080	20347589
WHB10194	HELIOS	abGENIX Whole Blood Genomic DNA Extraction Kit	NEBNext UltraII DNA library Prep Kit for Illumina	20363559	20372230	20357599	20364080	20347589
WHB10195	HELIOS	abGENIX Whole Blood Genomic DNA Extraction Kit	NEBNext UltraII DNA library Prep Kit for Illumina	20363559	20372230	20357599	20364080	20347589
WHB10197	HELIOS	abGENIX Whole Blood Genomic DNA Extraction Kit	NEBNext UltraII DNA library Prep Kit for Illumina	20363559	20372230	20357599	20364080	20347589
WHB10198	HELIOS	abGENIX Whole Blood Genomic DNA Extraction Kit	NEBNext UltraII DNA library Prep Kit for Illumina	20363559	20372230	20357599	20364080	20347589
WHB10199	HELIOS	abGENIX Whole Blood Genomic DNA Extraction Kit	NEBNext UltraII DNA library Prep Kit for Illumina	20363559	20372230	20357599	20364080	20347589
WHB10200	HELIOS	abGENIX Whole Blood Genomic DNA Extraction Kit	NEBNext UltraII DNA library Prep Kit for Illumina	20363559	20372230	20357599	20364080	20347589
WHB10201	HELIOS	abGENIX Whole Blood Genomic DNA Extraction Kit	NEBNext UltraII DNA library Prep Kit for Illumina	20363559	20372230	20357599	20364080	20347589
WHB10202	HELIOS	abGENIX Whole Blood Genomic DNA Extraction Kit	NEBNext UltraII DNA library Prep Kit for Illumina	20363559	20372230	20357599	20364080	20347589
WHB10203	HELIOS	abGENIX Whole Blood Genomic DNA Extraction Kit	NEBNext UltraII DNA library Prep Kit for Illumina	20363559	20372230	20357599	20364080	20347589
WHB10204	HELIOS	abGENIX Whole Blood Genomic DNA Extraction Kit	NEBNext UltraII DNA library Prep Kit for Illumina	20363559	20372230	20357599	20364080	20347589
WHB10205	HELIOS	abGENIX Whole Blood Genomic DNA Extraction Kit	NEBNext UltraII DNA library Prep Kit for Illumina	20363559	20372230	20357599	20364080	20347589
WHB10206	HELIOS	abGENIX Whole Blood Genomic DNA Extraction Kit	NEBNext UltraII DNA library Prep Kit for Illumina	20363559	20372230	20357599	20364080	20347589
WHB10207	HELIOS	abGENIX Whole Blood Genomic DNA Extraction Kit	NEBNext UltraII DNA library Prep Kit for Illumina	20363559	20372230	20357599	20364080	20347589
WHB10208	HELIOS	abGENIX Whole Blood Genomic DNA Extraction Kit	NEBNext UltraII DNA library Prep Kit for Illumina	20363559	20372230	20357599	20364080	20347589
WHB10209	HELIOS	abGENIX Whole Blood Genomic DNA Extraction Kit	NEBNext UltraII DNA library Prep Kit for Illumina	20363559	20364588	20356807	20364082	20347589
WHB10210	HELIOS	abGENIX Whole Blood Genomic DNA Extraction Kit	NEBNext UltraII DNA library Prep Kit for Illumina	20363559	20364588	20356807	20364082	20347589
WHB10211	HELIOS	abGENIX Whole Blood Genomic DNA Extraction Kit	NEBNext UltraII DNA library Prep Kit for Illumina	20363559	20372230	20357599	20364080	20347589
WHB10212	HELIOS	abGENIX Whole Blood Genomic DNA Extraction Kit	NEBNext UltraII DNA library Prep Kit for Illumina	20363559	20364588	20356807	20364082	20347589
WHB10213	HELIOS	abGENIX Whole Blood Genomic DNA Extraction Kit	NEBNext UltraII DNA library Prep Kit for Illumina	20363559	20364588	20356807	20364082	20347589
WHB10214	HELIOS	abGENIX Whole Blood Genomic DNA Extraction Kit	NEBNext UltraII DNA library Prep Kit for Illumina	20363559	20364588	20356807	20364082	20347589
WHB10215	HELIOS	abGENIX Whole Blood Genomic DNA Extraction Kit	NEBNext UltraII DNA library Prep Kit for Illumina	20363559	20364588	20356807	20364082	20347589
WHB10216	HELIOS	abGENIX Whole Blood Genomic DNA Extraction Kit	NEBNext UltraII DNA library Prep Kit for Illumina	20363559	20364588	20356807	20364082	20347589
WHB10217	HELIOS	abGENIX Whole Blood Genomic DNA Extraction Kit	NEBNext UltraII DNA library Prep Kit for Illumina	20363559	20364588	20356807	20364082	20347589
WHB10218	HELIOS	abGENIX Whole Blood Genomic DNA Extraction Kit	NEBNext UltraII DNA library Prep Kit for Illumina	20363559	20364588	20356807	20364082	20347589
WHB10219	HELIOS	abGENIX Whole Blood Genomic DNA Extraction Kit	NEBNext UltraII DNA library Prep Kit for Illumina	20363559	20364588	20356807	20364082	20347589
WHB10220	HELIOS	abGENIX Whole Blood Genomic DNA Extraction Kit	NEBNext UltraII DNA library Prep Kit for Illumina	20363559	20364588	20356807	20364082	20347589
WHB10221	HELIOS	abGENIX Whole Blood Genomic DNA Extraction Kit	NEBNext UltraII DNA library Prep Kit for Illumina	20363559	20364588	20356807	20364082	20347589
WHB10223	HELIOS	abGENIX Whole Blood Genomic DNA Extraction Kit	NEBNext UltraII DNA library Prep Kit for Illumina	20363559	20364588	20356807	20364082	20347589
WHB10224	HELIOS	abGENIX Whole Blood Genomic DNA Extraction Kit	NEBNext UltraII DNA library Prep Kit for Illumina	20363559	20364588	20356807	20364082	20347589
WHB10225	HELIOS	abGENIX Whole Blood Genomic DNA Extraction Kit	NEBNext UltraII DNA library Prep Kit for Illumina	20363559	20364588	20356807	20364082	20347589
WHB10226	HELIOS	abGENIX Whole Blood Genomic DNA Extraction Kit	NEBNext UltraII DNA library Prep Kit for Illumina	20363559	20364588	20356807	20364082	20347589
WHB10227	HELIOS	abGENIX Whole Blood Genomic DNA Extraction Kit	NEBNext UltraII DNA library Prep Kit for Illumina	20363559	20364588	20356807	20364082	20347589
WHB10228	HELIOS	abGENIX Whole Blood Genomic DNA Extraction Kit	NEBNext UltraII DNA library Prep Kit for Illumina	20363559	20364588	20356807	20364082	20347589
WHB10229	HELIOS	abGENIX Whole Blood Genomic DNA Extraction Kit	NEBNext UltraII DNA library Prep Kit for Illumina	20363559	20364588	20356807	20364082	20347589
WHB10230	HELIOS	abGENIX Whole Blood Genomic DNA Extraction Kit	NEBNext UltraII DNA library Prep Kit for Illumina	20364059	20364588	20357599	20364080	20347589
WHB10232	HELIOS	abGENIX Whole Blood Genomic DNA Extraction Kit	NEBNext UltraII DNA library Prep Kit for Illumina	20364059	20374150	20356807	20364082	20350041
WHB10233	HELIOS	abGENIX Whole Blood Genomic DNA Extraction Kit	NEBNext UltraII DNA library Prep Kit for Illumina	20364059	20364588	20357599	20364080	20347589
WHB10234	HELIOS	abGENIX Whole Blood Genomic DNA Extraction Kit	NEBNext UltraII DNA library Prep Kit for Illumina	20364059	20364588	20357599	20364080	20347589
WHB10235	HELIOS	abGENIX Whole Blood Genomic DNA Extraction Kit	NEBNext UltraII DNA library Prep Kit for Illumina	20364059	20364588	20357599	20364080	20347589
WHB10236	HELIOS	abGENIX Whole Blood Genomic DNA Extraction Kit	NEBNext UltraII DNA library Prep Kit for Illumina	20364059	20364588	20357599	20364080	20347589
WHB10237	HELIOS	abGENIX Whole Blood Genomic DNA Extraction Kit	NEBNext UltraII DNA library Prep Kit for Illumina	20364059	20364588	20357599	20364080	20347589
WHB10238	HELIOS	abGENIX Whole Blood Genomic DNA Extraction Kit	NEBNext UltraII DNA library Prep Kit for Illumina	20364059	20364588	20357599	20364080	20347589
WHB10239	HELIOS	abGENIX Whole Blood Genomic DNA Extraction Kit	NEBNext UltraII DNA library Prep Kit for Illumina	20364059	20364588	20357599	20364080	20347589
WHB10240	HELIOS	abGENIX Whole Blood Genomic DNA Extraction Kit	NEBNext UltraII DNA library Prep Kit for Illumina	20364059	20364588	20357599	20364080	20347589
WHB10241	HELIOS	abGENIX Whole Blood Genomic DNA Extraction Kit	NEBNext UltraII DNA library Prep Kit for Illumina	20364059	20364588	20357599	20364080	20347589
WHB10242	HELIOS	abGENIX Whole Blood Genomic DNA Extraction Kit	NEBNext UltraII DNA library Prep Kit for Illumina	20364059	20364588	20357599	20364080	20347589
WHB10243	HELIOS	abGENIX Whole Blood Genomic DNA Extraction Kit	NEBNext UltraII DNA library Prep Kit for Illumina	20364059	20364588	20357599	20364080	20347589
WHB10244	HELIOS	abGENIX Whole Blood Genomic DNA Extraction Kit	NEBNext UltraII DNA library Prep Kit for Illumina	20364059	20364588	20357599	20364080	20347589
WHB10245	HELIOS	abGENIX Whole Blood Genomic DNA Extraction Kit	NEBNext UltraII DNA library Prep Kit for Illumina	20364059	20364588	20357599	20364080	20347589
WHB10246	HELIOS	abGENIX Whole Blood Genomic DNA Extraction Kit	NEBNext UltraII DNA library Prep Kit for Illumina	20364059	20364588	20357599	20364080	20347589
WHB10247	HELIOS	abGENIX Whole Blood Genomic DNA Extraction Kit	NEBNext UltraII DNA library Prep Kit for Illumina	20364059	20364588	20357599	20364080	20347589
WHB10248	HELIOS	abGENIX Whole Blood Genomic DNA Extraction Kit	NEBNext UltraII DNA library Prep Kit for Illumina	20382082	20381023	20359355	20382943	20358945
WHB10249	HELIOS	abGENIX Whole Blood Genomic DNA Extraction Kit	NEBNext UltraII DNA library Prep Kit for Illumina	20364059	20364588	20357599	20364080	20347589
WHB10250	HELIOS	abGENIX Whole Blood Genomic DNA Extraction Kit	NEBNext UltraII DNA library Prep Kit for Illumina	20382082	20381023	20359355	20382943	20358945
WHB10251	HELIOS	abGENIX Whole Blood Genomic DNA Extraction Kit	NEBNext UltraII DNA library Prep Kit for Illumina	20364059	20364588	20357599	20364080	20347589
WHB10252	HELIOS	abGENIX Whole Blood Genomic DNA Extraction Kit	NEBNext UltraII DNA library Prep Kit for Illumina	20364059	20364588	20356807	20364080	20347590
WHB10253	HELIOS	abGENIX Whole Blood Genomic DNA Extraction Kit	NEBNext UltraII DNA library Prep Kit for Illumina	20364059	20364588	20357599	20364080	20347589
WHB10254	HELIOS	abGENIX Whole Blood Genomic DNA Extraction Kit	NEBNext UltraII DNA library Prep Kit for Illumina	20364059	20364588	20356807	20364080	20347590
WHB10255	HELIOS	abGENIX Whole Blood Genomic DNA Extraction Kit	NEBNext UltraII DNA library Prep Kit for Illumina	20364059	20364588	20357599	20364080	20347589
WHB10256	HELIOS	abGENIX Whole Blood Genomic DNA Extraction Kit	NEBNext UltraII DNA library Prep Kit for Illumina	20364059	20364588	20356807	20364080	20347590
WHB10258	HELIOS	abGENIX Whole Blood Genomic DNA Extraction Kit	NEBNext UltraII DNA library Prep Kit for Illumina	20364059	20364588	20356807	20364080	20347590
WHB10259	HELIOS	abGENIX Whole Blood Genomic DNA Extraction Kit	NEBNext UltraII DNA library Prep Kit for Illumina	20364059	20364588	20356807	20364080	20347590
WHB10260	HELIOS	abGENIX Whole Blood Genomic DNA Extraction Kit	NEBNext UltraII DNA library Prep Kit for Illumina	20382082	20381023	20359355	20382943	20358945
WHB10261	HELIOS	abGENIX Whole Blood Genomic DNA Extraction Kit	NEBNext UltraII DNA library Prep Kit for Illumina	20364059	20364588	20356807	20364080	20347590
WHB10262	HELIOS	abGENIX Whole Blood Genomic DNA Extraction Kit	NEBNext UltraII DNA library Prep Kit for Illumina	20364059	20364588	20356807	20364080	20347590
WHB10263	HELIOS	abGENIX Whole Blood Genomic DNA Extraction Kit	NEBNext UltraII DNA library Prep Kit for Illumina	20364059	20374150	20356807	20364082	20350041
WHB10264	HELIOS	abGENIX Whole Blood Genomic DNA Extraction Kit	NEBNext UltraII DNA library Prep Kit for Illumina	20363559	20364085	20348434	20364080	20347589
WHB10265	HELIOS	abGENIX Whole Blood Genomic DNA Extraction Kit	NEBNext UltraII DNA library Prep Kit for Illumina	20363559	20364085	20348434	20364080	20347589
WHB10266	HELIOS	abGENIX Whole Blood Genomic DNA Extraction Kit	NEBNext UltraII DNA library Prep Kit for Illumina	20363559	20364085	20348434	20364080	20347589
WHB10267	HELIOS	abGENIX Whole Blood Genomic DNA Extraction Kit	NEBNext UltraII DNA library Prep Kit for Illumina	20363559	20364085	20348434	20364080	20347589
WHB10268	HELIOS	abGENIX Whole Blood Genomic DNA Extraction Kit	NEBNext UltraII DNA library Prep Kit for Illumina	20363559	20364085	20348434	20364080	20347589
WHB10269	HELIOS	abGENIX Whole Blood Genomic DNA Extraction Kit	NEBNext UltraII DNA library Prep Kit for Illumina	20363559	20364085	20348434	20364080	20347589
WHB10270	HELIOS	abGENIX Whole Blood Genomic DNA Extraction Kit	NEBNext UltraII DNA library Prep Kit for Illumina	20364059	20364588	20356807	20364081	20350041
WHB10271	HELIOS	abGENIX Whole Blood Genomic DNA Extraction Kit	NEBNext UltraII DNA library Prep Kit for Illumina	20364059	20364588	20356807	20364082	20350041
WHB10272	HELIOS	abGENIX Whole Blood Genomic DNA Extraction Kit	NEBNext UltraII DNA library Prep Kit for Illumina	20363559	20364085	20348434	20364080	20347589
WHB10273	HELIOS	abGENIX Whole Blood Genomic DNA Extraction Kit	NEBNext UltraII DNA library Prep Kit for Illumina	20363559	20364085	20348434	20364080	20347589
WHB10274	HELIOS	abGENIX Whole Blood Genomic DNA Extraction Kit	NEBNext UltraII DNA library Prep Kit for Illumina	20363559	20364588	20357599	20364080	20347589
WHB10275	HELIOS	abGENIX Whole Blood Genomic DNA Extraction Kit	NEBNext UltraII DNA library Prep Kit for Illumina	20363559	20364588	20357599	20364080	20347589
WHB10276	HELIOS	abGENIX Whole Blood Genomic DNA Extraction Kit	NEBNext UltraII DNA library Prep Kit for Illumina	20363559	20364085	20348434	20364080	20347589
WHB10277	HELIOS	abGENIX Whole Blood Genomic DNA Extraction Kit	NEBNext UltraII DNA library Prep Kit for Illumina	20363559	20364085	20348434	20364080	20347589
WHB10278	HELIOS	abGENIX Whole Blood Genomic DNA Extraction Kit	NEBNext UltraII DNA library Prep Kit for Illumina	20364059	20364588	20356807	20364082	20350041
WHB10279	HELIOS	abGENIX Whole Blood Genomic DNA Extraction Kit	NEBNext UltraII DNA library Prep Kit for Illumina	20364059	20364588	20356807	20364081	20350041
WHB10280	HELIOS	abGENIX Whole Blood Genomic DNA Extraction Kit	NEBNext UltraII DNA library Prep Kit for Illumina	20363559	20364085	20348434	20364080	20347589
WHB10281	HELIOS	abGENIX Whole Blood Genomic DNA Extraction Kit	NEBNext UltraII DNA library Prep Kit for Illumina	20363559	20364588	20357599	20364080	20347589
WHB10282	HELIOS	abGENIX Whole Blood Genomic DNA Extraction Kit	NEBNext UltraII DNA library Prep Kit for Illumina	20363559	20364085	20348434	20364080	20347589
WHB10283	HELIOS	abGENIX Whole Blood Genomic DNA Extraction Kit	NEBNext UltraII DNA library Prep Kit for Illumina	20363559	20364085	20348434	20364080	20347589
WHB10284	HELIOS	abGENIX Whole Blood Genomic DNA Extraction Kit	NEBNext UltraII DNA library Prep Kit for Illumina	20363559	20364085	20348434	20364080	20347589
WHB10285	HELIOS	abGENIX Whole Blood Genomic DNA Extraction Kit	NEBNext UltraII DNA library Prep Kit for Illumina	20363559	20364085	20348434	20364080	20347589
WHB10286	HELIOS	abGENIX Whole Blood Genomic DNA Extraction Kit	NEBNext UltraII DNA library Prep Kit for Illumina	20364059	20364588	20356807	20364082	20350041
WHB10287	HELIOS	abGENIX Whole Blood Genomic DNA Extraction Kit	NEBNext UltraII DNA library Prep Kit for Illumina	20364059	20364588	20356807	20364082	20350041
WHB10288	HELIOS	abGENIX Whole Blood Genomic DNA Extraction Kit	NEBNext UltraII DNA library Prep Kit for Illumina	20363559	20364085	20348434	20364080	20347589
WHB10289	HELIOS	abGENIX Whole Blood Genomic DNA Extraction Kit	NEBNext UltraII DNA library Prep Kit for Illumina	20363559	20364085	20348434	20364080	20347589
WHB10290	HELIOS	abGENIX Whole Blood Genomic DNA Extraction Kit	NEBNext UltraII DNA library Prep Kit for Illumina	20363559	20364085	20348434	20364080	20347589
WHB10291	HELIOS	abGENIX Whole Blood Genomic DNA Extraction Kit	NEBNext UltraII DNA library Prep Kit for Illumina	20363559	20364085	20348434	20364080	20347589
WHB10292	HELIOS	abGENIX Whole Blood Genomic DNA Extraction Kit	NEBNext UltraII DNA library Prep Kit for Illumina	20363559	20364588	20356807	20364080	20347589
WHB10293	HELIOS	abGENIX Whole Blood Genomic DNA Extraction Kit	NEBNext UltraII DNA library Prep Kit for Illumina	20363559	20364085	20348434	20364080	20347589
WHB10294	HELIOS	abGENIX Whole Blood Genomic DNA Extraction Kit	NEBNext UltraII DNA library Prep Kit for Illumina	20364059	20364588	20356807	20364082	20350041
WHB10295	HELIOS	abGENIX Whole Blood Genomic DNA Extraction Kit	NEBNext UltraII DNA library Prep Kit for Illumina	20364059	20364588	20356807	20364082	20350041
WHB10296	HELIOS	abGENIX Whole Blood Genomic DNA Extraction Kit	NEBNext UltraII DNA library Prep Kit for Illumina	20363559	20364588	20356807	20364080	20347589
WHB10297	HELIOS	abGENIX Whole Blood Genomic DNA Extraction Kit	NEBNext UltraII DNA library Prep Kit for Illumina	20363559	20364588	20356807	20364080	20347589
WHB10298	HELIOS	abGENIX Whole Blood Genomic DNA Extraction Kit	NEBNext UltraII DNA library Prep Kit for Illumina	20363559	20364588	20356807	20364080	20347589
WHB10299	HELIOS	abGENIX Whole Blood Genomic DNA Extraction Kit	NEBNext UltraII DNA library Prep Kit for Illumina	20363559	20364588	20356807	20364080	20347589
WHB10300	HELIOS	abGENIX Whole Blood Genomic DNA Extraction Kit	NEBNext UltraII DNA library Prep Kit for Illumina	20363559	20364588	20356807	20364080	20347589
WHB10301	HELIOS	abGENIX Whole Blood Genomic DNA Extraction Kit	NEBNext UltraII DNA library Prep Kit for Illumina	20363559	20364588	20356807	20364080	20347589
WHB10302	HELIOS	abGENIX Whole Blood Genomic DNA Extraction Kit	NEBNext UltraII DNA library Prep Kit for Illumina	20364059	20364588	20356807	20364082	20350041
WHB10303	HELIOS	abGENIX Whole Blood Genomic DNA Extraction Kit	NEBNext UltraII DNA library Prep Kit for Illumina	20364059	20364588	20356807	20364082	20350041
WHB10304	HELIOS	abGENIX Whole Blood Genomic DNA Extraction Kit	NEBNext UltraII DNA library Prep Kit for Illumina	20363559	20364588	20356807	20364080	20347589
WHB10305	HELIOS	abGENIX Whole Blood Genomic DNA Extraction Kit	NEBNext UltraII DNA library Prep Kit for Illumina	20363559	20364588	20356807	20364080	20347589
WHB10306	HELIOS	abGENIX Whole Blood Genomic DNA Extraction Kit	NEBNext UltraII DNA library Prep Kit for Illumina	20363559	20364588	20356807	20364080	20347589
WHB10307	HELIOS	abGENIX Whole Blood Genomic DNA Extraction Kit	NEBNext UltraII DNA library Prep Kit for Illumina	20363559	20364588	20356807	20364080	20347589
WHB10308	HELIOS	abGENIX Whole Blood Genomic DNA Extraction Kit	NEBNext UltraII DNA library Prep Kit for Illumina	20363559	20364588	20356807	20364080	20347589
WHB10309	HELIOS	abGENIX Whole Blood Genomic DNA Extraction Kit	NEBNext UltraII DNA library Prep Kit for Illumina	20363559	20364588	20356807	20364080	20347589
WHB10310	HELIOS	abGENIX Whole Blood Genomic DNA Extraction Kit	NEBNext UltraII DNA library Prep Kit for Illumina	20364059	20364588	20356807	20364082	20350041
WHB10311	HELIOS	abGENIX Whole Blood Genomic DNA Extraction Kit	NEBNext UltraII DNA library Prep Kit for Illumina	20364059	20364588	20356807	20364082	20350041
WHB10312	HELIOS	abGENIX Whole Blood Genomic DNA Extraction Kit	NEBNext UltraII DNA library Prep Kit for Illumina	20363559	20364588	20356807	20364080	20347589
WHB10313	HELIOS	abGENIX Whole Blood Genomic DNA Extraction Kit	NEBNext UltraII DNA library Prep Kit for Illumina	20363559	20364588	20356807	20364080	20347589
WHB10314	HELIOS	abGENIX Whole Blood Genomic DNA Extraction Kit	NEBNext UltraII DNA library Prep Kit for Illumina	20363559	20364588	20356807	20364080	20347589
WHB10315	HELIOS	abGENIX Whole Blood Genomic DNA Extraction Kit	NEBNext UltraII DNA library Prep Kit for Illumina	20363559	20364588	20356807	20364080	20347589
WHB10316	HELIOS	abGENIX Whole Blood Genomic DNA Extraction Kit	NEBNext UltraII DNA library Prep Kit for Illumina	20363559	20364588	20356807	20364080	20347589
WHB10317	HELIOS	abGENIX Whole Blood Genomic DNA Extraction Kit	NEBNext UltraII DNA library Prep Kit for Illumina	20363559	20364588	20356807	20364080	20347589
WHB10318	HELIOS	abGENIX Whole Blood Genomic DNA Extraction Kit	NEBNext UltraII DNA library Prep Kit for Illumina	20364059	20364588	20356807	20364082	20350041
WHB10319	HELIOS	abGENIX Whole Blood Genomic DNA Extraction Kit	NEBNext UltraII DNA library Prep Kit for Illumina	20364059	20364588	20356807	20364082	20350041
WHB10320	HELIOS	abGENIX Whole Blood Genomic DNA Extraction Kit	NEBNext UltraII DNA library Prep Kit for Illumina	20363559	20364588	20356807	20364080	20347589
WHB10321	HELIOS	abGENIX Whole Blood Genomic DNA Extraction Kit	NEBNext UltraII DNA library Prep Kit for Illumina	20363559	20364588	20357599	20364080	20347589
WHB10322	HELIOS	abGENIX Whole Blood Genomic DNA Extraction Kit	NEBNext UltraII DNA library Prep Kit for Illumina	20363559	20364588	20357599	20364080	20347589
WHB10323	HELIOS	abGENIX Whole Blood Genomic DNA Extraction Kit	NEBNext UltraII DNA library Prep Kit for Illumina	20363559	20364588	20357599	20364080	20347589
WHB10324	HELIOS	abGENIX Whole Blood Genomic DNA Extraction Kit	NEBNext UltraII DNA library Prep Kit for Illumina	20363559	20364588	20357599	20364080	20347589
WHB10325	HELIOS	abGENIX Whole Blood Genomic DNA Extraction Kit	NEBNext UltraII DNA library Prep Kit for Illumina	20363559	20364588	20357599	20364080	20347589
WHB10326	HELIOS	abGENIX Whole Blood Genomic DNA Extraction Kit	NEBNext UltraII DNA library Prep Kit for Illumina	20364059	20364588	20356807	20364082	20350041
WHB10327	HELIOS	abGENIX Whole Blood Genomic DNA Extraction Kit	NEBNext UltraII DNA library Prep Kit for Illumina	20364059	20364588	20356807	20364082	20350041
WHB10328	HELIOS	abGENIX Whole Blood Genomic DNA Extraction Kit	NEBNext UltraII DNA library Prep Kit for Illumina	20363559	20364588	20357599	20364080	20347589
WHB10329	HELIOS	abGENIX Whole Blood Genomic DNA Extraction Kit	NEBNext UltraII DNA library Prep Kit for Illumina	20363559	20364588	20357599	20364080	20347589
WHB10330	HELIOS	abGENIX Whole Blood Genomic DNA Extraction Kit	NEBNext UltraII DNA library Prep Kit for Illumina	20363559	20364588	20357599	20364080	20347589
WHB10331	HELIOS	abGENIX Whole Blood Genomic DNA Extraction Kit	NEBNext UltraII DNA library Prep Kit for Illumina	20363559	20364588	20357599	20364080	20347589
WHB10332	HELIOS	abGENIX Whole Blood Genomic DNA Extraction Kit	NEBNext UltraII DNA library Prep Kit for Illumina	20363559	20364588	20357599	20364080	20347589
WHB10333	HELIOS	abGENIX Whole Blood Genomic DNA Extraction Kit	NEBNext UltraII DNA library Prep Kit for Illumina	20363559	20364588	20357599	20364080	20347589
WHB10334	HELIOS	abGENIX Whole Blood Genomic DNA Extraction Kit	NEBNext UltraII DNA library Prep Kit for Illumina	20364059	20364588	20356807	20364082	20350041
WHB10335	HELIOS	abGENIX Whole Blood Genomic DNA Extraction Kit	NEBNext UltraII DNA library Prep Kit for Illumina	20364059	20364588	20356807	20364082	20350041
WHB10336	HELIOS	abGENIX Whole Blood Genomic DNA Extraction Kit	NEBNext UltraII DNA library Prep Kit for Illumina	20363559	20364588	20357599	20364080	20347589
WHB10337	HELIOS	abGENIX Whole Blood Genomic DNA Extraction Kit	NEBNext UltraII DNA library Prep Kit for Illumina	20363559	20364588	20357599	20364080	20347589
WHB10338	HELIOS	abGENIX Whole Blood Genomic DNA Extraction Kit	NEBNext UltraII DNA library Prep Kit for Illumina	20363559	20364588	20357599	20364080	20347589
WHB10339	HELIOS	abGENIX Whole Blood Genomic DNA Extraction Kit	NEBNext UltraII DNA library Prep Kit for Illumina	20363559	20364588	20357599	20364080	20347589
WHB10340	HELIOS	abGENIX Whole Blood Genomic DNA Extraction Kit	NEBNext UltraII DNA library Prep Kit for Illumina	20363559	20364588	20357599	20364080	20347589
WHB10341	HELIOS	abGENIX Whole Blood Genomic DNA Extraction Kit	NEBNext UltraII DNA library Prep Kit for Illumina	20363559	20364588	20357599	20364080	20347589
WHB10342	HELIOS	abGENIX Whole Blood Genomic DNA Extraction Kit	NEBNext UltraII DNA library Prep Kit for Illumina	20364059	20364588	20356807	20364082	20350041
WHB10343	HELIOS	abGENIX Whole Blood Genomic DNA Extraction Kit	NEBNext UltraII DNA library Prep Kit for Illumina	20364059	20364588	20356807	20364082	20350041
WHB10344	HELIOS	abGENIX Whole Blood Genomic DNA Extraction Kit	NEBNext UltraII DNA library Prep Kit for Illumina	20363559	20364588	20357599	20364080	20347589
WHB10345	HELIOS	abGENIX Whole Blood Genomic DNA Extraction Kit	NEBNext UltraII DNA library Prep Kit for Illumina	20363559	20364588	20357599	20364080	20347589
WHB10347	HELIOS	abGENIX Whole Blood Genomic DNA Extraction Kit	NEBNext UltraII DNA library Prep Kit for Illumina	20363559	20364588	20357599	20364080	20347589
WHB10349	HELIOS	abGENIX Whole Blood Genomic DNA Extraction Kit	NEBNext UltraII DNA library Prep Kit for Illumina	20363559	20364588	20357599	20364080	20347589
WHB10350	HELIOS	abGENIX Whole Blood Genomic DNA Extraction Kit	NEBNext UltraII DNA library Prep Kit for Illumina	20364059	20364588	20356807	20364082	20350041
WHB10351	HELIOS	abGENIX Whole Blood Genomic DNA Extraction Kit	NEBNext UltraII DNA library Prep Kit for Illumina	20374156	20374149	20350208	20364081	20347589
WHB10352	HELIOS	abGENIX Whole Blood Genomic DNA Extraction Kit	NEBNext UltraII DNA library Prep Kit for Illumina	20363559	20364588	20357599	20364080	20347589
WHB10353	HELIOS	abGENIX Whole Blood Genomic DNA Extraction Kit	NEBNext UltraII DNA library Prep Kit for Illumina	20363559	20364588	20357599	20364080	20347589
WHB10354	HELIOS	abGENIX Whole Blood Genomic DNA Extraction Kit	NEBNext UltraII DNA library Prep Kit for Illumina	20363559	20364588	20357599	20364080	20347589
WHB10355	HELIOS	abGENIX Whole Blood Genomic DNA Extraction Kit	NEBNext UltraII DNA library Prep Kit for Illumina	20363559	20364588	20357599	20364080	20347589
WHB10356	HELIOS	abGENIX Whole Blood Genomic DNA Extraction Kit	NEBNext UltraII DNA library Prep Kit for Illumina	20363559	20364588	20357599	20364080	20347589
WHB10357	HELIOS	abGENIX Whole Blood Genomic DNA Extraction Kit	NEBNext UltraII DNA library Prep Kit for Illumina	20363559	20364588	20357599	20364080	20347589
WHB10358	HELIOS	abGENIX Whole Blood Genomic DNA Extraction Kit	NEBNext UltraII DNA library Prep Kit for Illumina	20364059	20364588	20356807	20364082	20350041
WHB10359	HELIOS	abGENIX Whole Blood Genomic DNA Extraction Kit	NEBNext UltraII DNA library Prep Kit for Illumina	20374156	20374149	20350208	20364081	20347589
WHB10360	HELIOS	abGENIX Whole Blood Genomic DNA Extraction Kit	NEBNext UltraII DNA library Prep Kit for Illumina	20363559	20364588	20356807	20364080	20347589
WHB10361	HELIOS	abGENIX Whole Blood Genomic DNA Extraction Kit	NEBNext UltraII DNA library Prep Kit for Illumina	20363559	20364588	20356807	20364080	20347589
WHB10362	HELIOS	abGENIX Whole Blood Genomic DNA Extraction Kit	NEBNext UltraII DNA library Prep Kit for Illumina	20363559	20364588	20356807	20364080	20347589
WHB10363	HELIOS	abGENIX Whole Blood Genomic DNA Extraction Kit	NEBNext UltraII DNA library Prep Kit for Illumina	20363559	20364588	20356807	20364080	20347589
WHB10364	HELIOS	abGENIX Whole Blood Genomic DNA Extraction Kit	NEBNext UltraII DNA library Prep Kit for Illumina	20363559	20364588	20356807	20364080	20347589
WHB10365	HELIOS	abGENIX Whole Blood Genomic DNA Extraction Kit	NEBNext UltraII DNA library Prep Kit for Illumina	20363559	20364588	20356807	20364080	20347589
WHB10366	HELIOS	abGENIX Whole Blood Genomic DNA Extraction Kit	NEBNext UltraII DNA library Prep Kit for Illumina	20363559	20364588	20356807	20364080	20347589
WHB10367	HELIOS	abGENIX Whole Blood Genomic DNA Extraction Kit	NEBNext UltraII DNA library Prep Kit for Illumina	20363559	20364588	20356807	20364080	20347589
WHB10368	HELIOS	abGENIX Whole Blood Genomic DNA Extraction Kit	NEBNext UltraII DNA library Prep Kit for Illumina	20363559	20364588	20356807	20364080	20347589
WHB10369	HELIOS	abGENIX Whole Blood Genomic DNA Extraction Kit	NEBNext UltraII DNA library Prep Kit for Illumina	20363559	20364588	20356807	20364080	20347589
WHB10370	HELIOS	abGENIX Whole Blood Genomic DNA Extraction Kit	NEBNext UltraII DNA library Prep Kit for Illumina	20363559	20364588	20356807	20364080	20347589
WHB10371	HELIOS	abGENIX Whole Blood Genomic DNA Extraction Kit	NEBNext UltraII DNA library Prep Kit for Illumina	20363559	20364588	20356807	20364080	20347589
WHB10372	HELIOS	abGENIX Whole Blood Genomic DNA Extraction Kit	NEBNext UltraII DNA library Prep Kit for Illumina	20363559	20364588	20356807	20364080	20347589
WHB10373	HELIOS	abGENIX Whole Blood Genomic DNA Extraction Kit	NEBNext UltraII DNA library Prep Kit for Illumina	20363559	20364588	20356807	20364080	20347589
WHB10374	HELIOS	abGENIX Whole Blood Genomic DNA Extraction Kit	NEBNext UltraII DNA library Prep Kit for Illumina	20363559	20364588	20356807	20364080	20347589
WHB10375	HELIOS	abGENIX Whole Blood Genomic DNA Extraction Kit	NEBNext UltraII DNA library Prep Kit for Illumina	20363559	20364588	20356807	20364080	20347589
WHB10376	HELIOS	abGENIX Whole Blood Genomic DNA Extraction Kit	NEBNext UltraII DNA library Prep Kit for Illumina	20363559	20364588	20356807	20364080	20347589
WHB10377	HELIOS	abGENIX Whole Blood Genomic DNA Extraction Kit	NEBNext UltraII DNA library Prep Kit for Illumina	20363559	20364588	20356807	20364080	20347589
WHB10378	HELIOS	abGENIX Whole Blood Genomic DNA Extraction Kit	NEBNext UltraII DNA library Prep Kit for Illumina	20363559	20364588	20356807	20364082	20347589
WHB10379	HELIOS	abGENIX Whole Blood Genomic DNA Extraction Kit	NEBNext UltraII DNA library Prep Kit for Illumina	20363559	20364588	20356807	20364080	20347589
WHB10380	HELIOS	abGENIX Whole Blood Genomic DNA Extraction Kit	NEBNext UltraII DNA library Prep Kit for Illumina	20363559	20364588	20356807	20364080	20347589
WHB10381	HELIOS	abGENIX Whole Blood Genomic DNA Extraction Kit	NEBNext UltraII DNA library Prep Kit for Illumina	20363559	20364588	20356807	20364082	20347589
WHB10382	HELIOS	abGENIX Whole Blood Genomic DNA Extraction Kit	NEBNext UltraII DNA library Prep Kit for Illumina	20363559	20364588	20356807	20364082	20347589
WHB10383	HELIOS	abGENIX Whole Blood Genomic DNA Extraction Kit	NEBNext UltraII DNA library Prep Kit for Illumina	20363559	20364588	20356807	20364082	20347589
WHB10384	HELIOS	abGENIX Whole Blood Genomic DNA Extraction Kit	NEBNext UltraII DNA library Prep Kit for Illumina	20363559	20364588	20356807	20364082	20347589
WHB10385	HELIOS	abGENIX Whole Blood Genomic DNA Extraction Kit	NEBNext UltraII DNA library Prep Kit for Illumina	20363559	20364588	20356807	20364082	20347589
WHB10386	HELIOS	abGENIX Whole Blood Genomic DNA Extraction Kit	NEBNext UltraII DNA library Prep Kit for Illumina	20363559	20364588	20356807	20364082	20347589
WHB10387	HELIOS	abGENIX Whole Blood Genomic DNA Extraction Kit	NEBNext UltraII DNA library Prep Kit for Illumina	20363559	20364588	20356807	20364082	20347589
WHB10388	HELIOS	abGENIX Whole Blood Genomic DNA Extraction Kit	NEBNext UltraII DNA library Prep Kit for Illumina	20363559	20364588	20356807	20364082	20347589
WHB10389	HELIOS	abGENIX Whole Blood Genomic DNA Extraction Kit	NEBNext UltraII DNA library Prep Kit for Illumina	20363559	20364588	20356807	20364082	20347589
WHB10390	HELIOS	abGENIX Whole Blood Genomic DNA Extraction Kit	NEBNext UltraII DNA library Prep Kit for Illumina	20363559	20364588	20356807	20364082	20347589
WHB10391	HELIOS	abGENIX Whole Blood Genomic DNA Extraction Kit	NEBNext UltraII DNA library Prep Kit for Illumina	20363559	20364588	20356807	20364082	20347589
WHB10392	HELIOS	abGENIX Whole Blood Genomic DNA Extraction Kit	NEBNext UltraII DNA library Prep Kit for Illumina	20363559	20364588	20356807	20364082	20347589
WHB10393	HELIOS	abGENIX Whole Blood Genomic DNA Extraction Kit	NEBNext UltraII DNA library Prep Kit for Illumina	20363559	20364588	20356807	20364082	20347589
WHB10394	HELIOS	abGENIX Whole Blood Genomic DNA Extraction Kit	NEBNext UltraII DNA library Prep Kit for Illumina	20363559	20364588	20356807	20364082	20347589
WHB10395	HELIOS	abGENIX Whole Blood Genomic DNA Extraction Kit	NEBNext UltraII DNA library Prep Kit for Illumina	20363559	20364588	20356807	20364082	20347589
WHB10396	HELIOS	abGENIX Whole Blood Genomic DNA Extraction Kit	NEBNext UltraII DNA library Prep Kit for Illumina	20363559	20364588	20356807	20364082	20347589
WHB10397	HELIOS	abGENIX Whole Blood Genomic DNA Extraction Kit	NEBNext UltraII DNA library Prep Kit for Illumina	20363559	20364588	20356807	20364082	20347589
WHB10398	HELIOS	abGENIX Whole Blood Genomic DNA Extraction Kit	NEBNext UltraII DNA library Prep Kit for Illumina	20363559	20364588	20356807	20364082	20347589
WHB10399	HELIOS	abGENIX Whole Blood Genomic DNA Extraction Kit	NEBNext UltraII DNA library Prep Kit for Illumina	20363559	20364588	20356807	20364082	20347589
WHB10400	HELIOS	abGENIX Whole Blood Genomic DNA Extraction Kit	NEBNext UltraII DNA library Prep Kit for Illumina	20363559	20364588	20357599	20364082	20347590
WHB10401	HELIOS	abGENIX Whole Blood Genomic DNA Extraction Kit	NEBNext UltraII DNA library Prep Kit for Illumina	20363559	20364588	20357599	20364082	20347590
WHB10402	HELIOS	abGENIX Whole Blood Genomic DNA Extraction Kit	NEBNext UltraII DNA library Prep Kit for Illumina	20363559	20364588	20357599	20364082	20347590
WHB10403	HELIOS	abGENIX Whole Blood Genomic DNA Extraction Kit	NEBNext UltraII DNA library Prep Kit for Illumina	20363559	20364588	20357599	20364082	20347590
WHB10404	HELIOS	abGENIX Whole Blood Genomic DNA Extraction Kit	NEBNext UltraII DNA library Prep Kit for Illumina	20363559	20364588	20357599	20364082	20347590
WHB10405	HELIOS	abGENIX Whole Blood Genomic DNA Extraction Kit	NEBNext UltraII DNA library Prep Kit for Illumina	20363559	20364588	20357599	20364082	20347590
WHB10406	HELIOS	abGENIX Whole Blood Genomic DNA Extraction Kit	NEBNext UltraII DNA library Prep Kit for Illumina	20363559	20364588	20357599	20364082	20347590
WHB10407	HELIOS	abGENIX Whole Blood Genomic DNA Extraction Kit	NEBNext UltraII DNA library Prep Kit for Illumina	20363559	20364588	20357599	20364082	20347590
WHB10408	HELIOS	abGENIX Whole Blood Genomic DNA Extraction Kit	NEBNext UltraII DNA library Prep Kit for Illumina	20363559	20364588	20357599	20364082	20347590
WHB10409	HELIOS	abGENIX Whole Blood Genomic DNA Extraction Kit	NEBNext UltraII DNA library Prep Kit for Illumina	20363559	20364588	20357599	20364082	20347590
WHB10410	HELIOS	abGENIX Whole Blood Genomic DNA Extraction Kit	NEBNext UltraII DNA library Prep Kit for Illumina	20363559	20364588	20357599	20364082	20347590
WHB10411	HELIOS	abGENIX Whole Blood Genomic DNA Extraction Kit	NEBNext UltraII DNA library Prep Kit for Illumina	20363559	20364588	20357599	20364082	20347590
WHB10412	HELIOS	abGENIX Whole Blood Genomic DNA Extraction Kit	NEBNext UltraII DNA library Prep Kit for Illumina	20363559	20364588	20357599	20364082	20347590
WHB10413	HELIOS	abGENIX Whole Blood Genomic DNA Extraction Kit	NEBNext UltraII DNA library Prep Kit for Illumina	20363559	20364588	20357599	20364082	20347590
WHB10414	HELIOS	abGENIX Whole Blood Genomic DNA Extraction Kit	NEBNext UltraII DNA library Prep Kit for Illumina	20363559	20364588	20357599	20364082	20347590
WHB10415	HELIOS	abGENIX Whole Blood Genomic DNA Extraction Kit	NEBNext UltraII DNA library Prep Kit for Illumina	20363559	20364588	20357599	20364082	20347590
WHB10416	HELIOS	abGENIX Whole Blood Genomic DNA Extraction Kit	NEBNext UltraII DNA library Prep Kit for Illumina	20363559	20364588	20357599	20364082	20347590
WHB10417	HELIOS	abGENIX Whole Blood Genomic DNA Extraction Kit	NEBNext UltraII DNA library Prep Kit for Illumina	20363559	20364588	20357599	20364082	20347590
WHB10418	HELIOS	abGENIX Whole Blood Genomic DNA Extraction Kit	NEBNext UltraII DNA library Prep Kit for Illumina	20363559	20364588	20357599	20364082	20347590
WHB10419	HELIOS	abGENIX Whole Blood Genomic DNA Extraction Kit	NEBNext UltraII DNA library Prep Kit for Illumina	20363559	20364588	20357599	20364082	20347590
WHB10420	HELIOS	abGENIX Whole Blood Genomic DNA Extraction Kit	NEBNext UltraII DNA library Prep Kit for Illumina	20363559	20364588	20357599	20364082	20347589
WHB10421	HELIOS	abGENIX Whole Blood Genomic DNA Extraction Kit	NEBNext UltraII DNA library Prep Kit for Illumina	20363559	20364588	20357599	20364082	20347589
WHB10422	HELIOS	abGENIX Whole Blood Genomic DNA Extraction Kit	NEBNext UltraII DNA library Prep Kit for Illumina	20363559	20364588	20357599	20364082	20347589
WHB10423	HELIOS	abGENIX Whole Blood Genomic DNA Extraction Kit	NEBNext UltraII DNA library Prep Kit for Illumina	20363559	20364588	20357599	20364082	20347589
WHB10424	HELIOS	abGENIX Whole Blood Genomic DNA Extraction Kit	NEBNext UltraII DNA library Prep Kit for Illumina	20363559	20364588	20357599	20364082	20347589
WHB10425	HELIOS	abGENIX Whole Blood Genomic DNA Extraction Kit	NEBNext UltraII DNA library Prep Kit for Illumina	20363559	20364588	20357599	20364082	20347589
WHB10426	HELIOS	abGENIX Whole Blood Genomic DNA Extraction Kit	NEBNext UltraII DNA library Prep Kit for Illumina	20363559	20364588	20357599	20364082	20347589
WHB10427	HELIOS	abGENIX Whole Blood Genomic DNA Extraction Kit	NEBNext UltraII DNA library Prep Kit for Illumina	20363559	20364588	20357599	20364082	20347589
WHB10428	HELIOS	abGENIX Whole Blood Genomic DNA Extraction Kit	NEBNext UltraII DNA library Prep Kit for Illumina	20363559	20364588	20357599	20364082	20347589
WHB10429	HELIOS	abGENIX Whole Blood Genomic DNA Extraction Kit	NEBNext UltraII DNA library Prep Kit for Illumina	20363559	20364588	20357599	20364082	20347589
WHB10430	HELIOS	abGENIX Whole Blood Genomic DNA Extraction Kit	NEBNext UltraII DNA library Prep Kit for Illumina	20363559	20364588	20357599	20364082	20347589
WHB10431	HELIOS	abGENIX Whole Blood Genomic DNA Extraction Kit	NEBNext UltraII DNA library Prep Kit for Illumina	20363559	20364588	20357599	20364082	20347589
WHB10432	HELIOS	abGENIX Whole Blood Genomic DNA Extraction Kit	NEBNext UltraII DNA library Prep Kit for Illumina	20363559	20364588	20357599	20364082	20347589
WHB10433	HELIOS	abGENIX Whole Blood Genomic DNA Extraction Kit	NEBNext UltraII DNA library Prep Kit for Illumina	20363559	20364588	20357599	20364082	20347589
WHB10434	HELIOS	abGENIX Whole Blood Genomic DNA Extraction Kit	NEBNext UltraII DNA library Prep Kit for Illumina	20363559	20364588	20357599	20364082	20347589
WHB10435	HELIOS	abGENIX Whole Blood Genomic DNA Extraction Kit	NEBNext UltraII DNA library Prep Kit for Illumina	20363559	20364588	20357599	20364082	20347589
WHB10436	HELIOS	abGENIX Whole Blood Genomic DNA Extraction Kit	NEBNext UltraII DNA library Prep Kit for Illumina	20363559	20364588	20357599	20364082	20347589
WHB10437	HELIOS	abGENIX Whole Blood Genomic DNA Extraction Kit	NEBNext UltraII DNA library Prep Kit for Illumina	20363559	20364588	20357599	20364082	20347589
WHB10438	HELIOS	abGENIX Whole Blood Genomic DNA Extraction Kit	NEBNext UltraII DNA library Prep Kit for Illumina	20364059	20364588	20356807	20364082	20347590
WHB10439	HELIOS	abGENIX Whole Blood Genomic DNA Extraction Kit	NEBNext UltraII DNA library Prep Kit for Illumina	20364059	20364588	20356807	20364082	20347590
WHB10440	HELIOS	abGENIX Whole Blood Genomic DNA Extraction Kit	NEBNext UltraII DNA library Prep Kit for Illumina	20364059	20364588	20356807	20364082	20347590
WHB10441	HELIOS	abGENIX Whole Blood Genomic DNA Extraction Kit	NEBNext UltraII DNA library Prep Kit for Illumina	20363559	20364588	20357599	20364082	20347589
WHB10442	HELIOS	abGENIX Whole Blood Genomic DNA Extraction Kit	NEBNext UltraII DNA library Prep Kit for Illumina	20363559	20364588	20357599	20364082	20347589
WHB10443	HELIOS	abGENIX Whole Blood Genomic DNA Extraction Kit	NEBNext UltraII DNA library Prep Kit for Illumina	20364059	20364588	20356807	20364082	20347590
WHB10444	HELIOS	abGENIX Whole Blood Genomic DNA Extraction Kit	NEBNext UltraII DNA library Prep Kit for Illumina	20364059	20364588	20356807	20364082	20347590
WHB10445	HELIOS	abGENIX Whole Blood Genomic DNA Extraction Kit	NEBNext UltraII DNA library Prep Kit for Illumina	20364059	20364588	20356807	20364082	20347590
WHB10446	HELIOS	abGENIX Whole Blood Genomic DNA Extraction Kit	NEBNext UltraII DNA library Prep Kit for Illumina	20364059	20364588	20356807	20364082	20347590
WHB10447	HELIOS	abGENIX Whole Blood Genomic DNA Extraction Kit	NEBNext UltraII DNA library Prep Kit for Illumina	20364059	20364588	20356807	20364082	20347590
WHB10448	HELIOS	abGENIX Whole Blood Genomic DNA Extraction Kit	NEBNext UltraII DNA library Prep Kit for Illumina	20364059	20364588	20356807	20364082	20347590
WHB10449	HELIOS	abGENIX Whole Blood Genomic DNA Extraction Kit	NEBNext UltraII DNA library Prep Kit for Illumina	20364059	20364588	20356807	20364082	20347590
WHB10450	HELIOS	abGENIX Whole Blood Genomic DNA Extraction Kit	NEBNext UltraII DNA library Prep Kit for Illumina	20364059	20364588	20356807	20364082	20347590
WHB10452	HELIOS	abGENIX Whole Blood Genomic DNA Extraction Kit	NEBNext UltraII DNA library Prep Kit for Illumina	20364059	20364588	20356807	20364082	20347590
WHB10453	HELIOS	abGENIX Whole Blood Genomic DNA Extraction Kit	NEBNext UltraII DNA library Prep Kit for Illumina	20364059	20364588	20356807	20364082	20347590
WHB10454	HELIOS	abGENIX Whole Blood Genomic DNA Extraction Kit	NEBNext UltraII DNA library Prep Kit for Illumina	20364059	20364588	20356807	20364082	20347590
WHB10455	HELIOS	abGENIX Whole Blood Genomic DNA Extraction Kit	NEBNext UltraII DNA library Prep Kit for Illumina	20364059	20364588	20356807	20364082	20347590
WHB10456	HELIOS	abGENIX Whole Blood Genomic DNA Extraction Kit	NEBNext UltraII DNA library Prep Kit for Illumina	20364059	20364588	20356807	20364082	20347590
WHB10457	HELIOS	abGENIX Whole Blood Genomic DNA Extraction Kit	NEBNext UltraII DNA library Prep Kit for Illumina	20364059	20364588	20356807	20364082	20347590
WHB10458	HELIOS	abGENIX Whole Blood Genomic DNA Extraction Kit	NEBNext UltraII DNA library Prep Kit for Illumina	20364059	20364588	20356807	20364082	20347590
WHB10459	HELIOS	abGENIX Whole Blood Genomic DNA Extraction Kit	NEBNext UltraII DNA library Prep Kit for Illumina	20364059	20364588	20356807	20364082	20347590
WHB10460	HELIOS	abGENIX Whole Blood Genomic DNA Extraction Kit	NEBNext UltraII DNA library Prep Kit for Illumina	20364059	20364588	20356807	20364080	20347590
WHB10461	HELIOS	abGENIX Whole Blood Genomic DNA Extraction Kit	NEBNext UltraII DNA library Prep Kit for Illumina	20364059	20364588	20356807	20364080	20347590
WHB10462	HELIOS	abGENIX Whole Blood Genomic DNA Extraction Kit	NEBNext UltraII DNA library Prep Kit for Illumina	20364059	20364588	20356807	20364080	20347590
WHB10463	HELIOS	abGENIX Whole Blood Genomic DNA Extraction Kit	NEBNext UltraII DNA library Prep Kit for Illumina	20364059	20364588	20356807	20364080	20347590
WHB10464	HELIOS	abGENIX Whole Blood Genomic DNA Extraction Kit	NEBNext UltraII DNA library Prep Kit for Illumina	20364059	20364588	20356807	20364080	20347590
WHB10465	HELIOS	abGENIX Whole Blood Genomic DNA Extraction Kit	NEBNext UltraII DNA library Prep Kit for Illumina	20364059	20364588	20356807	20364080	20347590
WHB10466	HELIOS	abGENIX Whole Blood Genomic DNA Extraction Kit	NEBNext UltraII DNA library Prep Kit for Illumina	20364059	20364588	20356807	20364080	20347590
WHB10467	HELIOS	abGENIX Whole Blood Genomic DNA Extraction Kit	NEBNext UltraII DNA library Prep Kit for Illumina	20364059	20364588	20356807	20364080	20347590
WHB10468	HELIOS	abGENIX Whole Blood Genomic DNA Extraction Kit	NEBNext UltraII DNA library Prep Kit for Illumina	20364059	20364588	20356807	20364080	20347590
WHB10469	HELIOS	abGENIX Whole Blood Genomic DNA Extraction Kit	NEBNext UltraII DNA library Prep Kit for Illumina	20364059	20364588	20356807	20364080	20347590
WHB10470	HELIOS	abGENIX Whole Blood Genomic DNA Extraction Kit	NEBNext UltraII DNA library Prep Kit for Illumina	20364059	20364588	20356807	20364080	20347590
WHB10471	HELIOS	abGENIX Whole Blood Genomic DNA Extraction Kit	NEBNext UltraII DNA library Prep Kit for Illumina	20364059	20364588	20356807	20364080	20347590
WHB10568	HELIOS	abGENIX Whole Blood Genomic DNA Extraction Kit	NEBNext UltraII DNA library Prep Kit for Illumina	20363559	20364588	20357599	20364080	20347589
WHB10569	HELIOS	abGENIX Whole Blood Genomic DNA Extraction Kit	NEBNext UltraII DNA library Prep Kit for Illumina	20374156	20374149	20350208	20364081	20350041
WHB10570	HELIOS	abGENIX Whole Blood Genomic DNA Extraction Kit	NEBNext UltraII DNA library Prep Kit for Illumina	20374156	20374149	20350208	20364081	20350041
WHB10572	HELIOS	abGENIX Whole Blood Genomic DNA Extraction Kit	NEBNext UltraII DNA library Prep Kit for Illumina	20374156	20374149	20350208	20364081	20350041
WHB10573	HELIOS	abGENIX Whole Blood Genomic DNA Extraction Kit	NEBNext UltraII DNA library Prep Kit for Illumina	20374156	20374149	20350208	20364081	20350041
WHB10574	HELIOS	abGENIX Whole Blood Genomic DNA Extraction Kit	NEBNext UltraII DNA library Prep Kit for Illumina	20374156	20374149	20350208	20364081	20350041
WHB10575	HELIOS	abGENIX Whole Blood Genomic DNA Extraction Kit	NEBNext UltraII DNA library Prep Kit for Illumina	20374156	20374149	20350208	20364081	20347589
WHB10576	HELIOS	abGENIX Whole Blood Genomic DNA Extraction Kit	NEBNext UltraII DNA library Prep Kit for Illumina	20374156	20374149	20350208	20364081	20350041
WHB10577	HELIOS	abGENIX Whole Blood Genomic DNA Extraction Kit	NEBNext UltraII DNA library Prep Kit for Illumina	20374156	20374149	20350208	20364081	20350041
WHB10578	HELIOS	abGENIX Whole Blood Genomic DNA Extraction Kit	NEBNext UltraII DNA library Prep Kit for Illumina	20374156	20374149	20350208	20364081	20347589
WHB10579	HELIOS	abGENIX Whole Blood Genomic DNA Extraction Kit	NEBNext UltraII DNA library Prep Kit for Illumina	20374156	20374149	20350208	20364081	20347589
WHB10580	HELIOS	abGENIX Whole Blood Genomic DNA Extraction Kit	NEBNext UltraII DNA library Prep Kit for Illumina	20374156	20374149	20350208	20364081	20350041
WHB10581	HELIOS	abGENIX Whole Blood Genomic DNA Extraction Kit	NEBNext UltraII DNA library Prep Kit for Illumina	20374156	20374149	20350208	20364081	20347589
WHB10582	HELIOS	abGENIX Whole Blood Genomic DNA Extraction Kit	NEBNext UltraII DNA library Prep Kit for Illumina	20374156	20374149	20350208	20364081	20347589
WHB10583	HELIOS	abGENIX Whole Blood Genomic DNA Extraction Kit	NEBNext UltraII DNA library Prep Kit for Illumina	20374156	20374149	20350208	20364081	20347589
WHB10584	HELIOS	abGENIX Whole Blood Genomic DNA Extraction Kit	NEBNext UltraII DNA library Prep Kit for Illumina	20374156	20374149	20350208	20364081	20350041
WHB10585	HELIOS	abGENIX Whole Blood Genomic DNA Extraction Kit	NEBNext UltraII DNA library Prep Kit for Illumina	20374156	20374149	20350208	20364081	20347589
WHB10586	HELIOS	abGENIX Whole Blood Genomic DNA Extraction Kit	NEBNext UltraII DNA library Prep Kit for Illumina	20374156	20374149	20350208	20364081	20350041
WHB10587	HELIOS	abGENIX Whole Blood Genomic DNA Extraction Kit	NEBNext UltraII DNA library Prep Kit for Illumina	20374156	20374149	20350208	20364081	20347589
WHB10588	HELIOS	abGENIX Whole Blood Genomic DNA Extraction Kit	NEBNext UltraII DNA library Prep Kit for Illumina	20374156	20374149	20350208	20364081	20350041
WHB10589	HELIOS	abGENIX Whole Blood Genomic DNA Extraction Kit	NEBNext UltraII DNA library Prep Kit for Illumina	20374156	20374149	20350208	20364081	20347589
WHB10590	HELIOS	abGENIX Whole Blood Genomic DNA Extraction Kit	NEBNext UltraII DNA library Prep Kit for Illumina	20374156	20374149	20350208	20364081	20347589
WHB10591	HELIOS	abGENIX Whole Blood Genomic DNA Extraction Kit	NEBNext UltraII DNA library Prep Kit for Illumina	20374156	20374149	20350208	20364081	20350041
WHB10592	HELIOS	abGENIX Whole Blood Genomic DNA Extraction Kit	NEBNext UltraII DNA library Prep Kit for Illumina	20374156	20374149	20350208	20364081	20350041
WHB10593	HELIOS	abGENIX Whole Blood Genomic DNA Extraction Kit	NEBNext UltraII DNA library Prep Kit for Illumina	20374156	20374149	20350208	20364081	20350041
WHB10594	HELIOS	abGENIX Whole Blood Genomic DNA Extraction Kit	NEBNext UltraII DNA library Prep Kit for Illumina	20374156	20374149	20350208	20364081	20350041
WHB10595	HELIOS	abGENIX Whole Blood Genomic DNA Extraction Kit	NEBNext UltraII DNA library Prep Kit for Illumina	20374156	20374149	20350208	20364081	20350041
WHB10596	HELIOS	abGENIX Whole Blood Genomic DNA Extraction Kit	NEBNext UltraII DNA library Prep Kit for Illumina	20374156	20374149	20350208	20364081	20350041
WHB10597	HELIOS	abGENIX Whole Blood Genomic DNA Extraction Kit	NEBNext UltraII DNA library Prep Kit for Illumina	20374156	20374149	20350208	20364081	20350041
WHB10598	HELIOS	abGENIX Whole Blood Genomic DNA Extraction Kit	NEBNext UltraII DNA library Prep Kit for Illumina	20374156	20374149	20350208	20364081	20350041
WHB10599	HELIOS	abGENIX Whole Blood Genomic DNA Extraction Kit	NEBNext UltraII DNA library Prep Kit for Illumina	20374156	20374149	20350208	20364081	20347589
WHB10640	MEC	Maxwell RSC Blood DNA Kit (AS1400)	NEBNext UltraII DNA library Prep Kit for Illumina	20382082	20382958	20365297	20382943	20358945
WHB10641	MEC	Maxwell RSC Blood DNA Kit (AS1400)	NEBNext UltraII DNA library Prep Kit for Illumina	20382082	20382958	20365297	20382943	20358945
WHB10642	MEC	Maxwell RSC Blood DNA Kit (AS1400)	NEBNext UltraII DNA library Prep Kit for Illumina	20382082	20382958	20365297	20382943	20358945
WHB10643	MEC	Maxwell RSC Blood DNA Kit (AS1400)	NEBNext UltraII DNA library Prep Kit for Illumina	20382082	20382958	20365297	20382943	20358945
WHB10644	MEC	Maxwell RSC Blood DNA Kit (AS1400)	NEBNext UltraII DNA library Prep Kit for Illumina	20382082	20382958	20365297	20382943	20358945
WHB10645	MEC	Maxwell RSC Blood DNA Kit (AS1400)	NEBNext UltraII DNA library Prep Kit for Illumina	20382082	20382958	20365297	20382943	20358945
WHB10646	MEC	Maxwell RSC Blood DNA Kit (AS1400)	NEBNext UltraII DNA library Prep Kit for Illumina	20382082	20382958	20365297	20382943	20358945
WHB10647	MEC	Maxwell RSC Blood DNA Kit (AS1400)	NEBNext UltraII DNA library Prep Kit for Illumina	20382082	20382958	20365297	20382943	20358945
WHB10648	MEC	Maxwell RSC Blood DNA Kit (AS1400)	NEBNext UltraII DNA library Prep Kit for Illumina	20382082	20382958	20365297	20382943	20358945
WHB10649	MEC	Maxwell RSC Blood DNA Kit (AS1400)	NEBNext UltraII DNA library Prep Kit for Illumina	20382082	20382958	20365297	20382943	20358945
WHB10650	MEC	Maxwell RSC Blood DNA Kit (AS1400)	NEBNext UltraII DNA library Prep Kit for Illumina	20382082	20382958	20365297	20382943	20358945
WHB10651	MEC	Maxwell RSC Blood DNA Kit (AS1400)	NEBNext UltraII DNA library Prep Kit for Illumina	20382082	20382958	20365297	20382943	20358945
WHB10652	MEC	Maxwell RSC Blood DNA Kit (AS1400)	NEBNext UltraII DNA library Prep Kit for Illumina	20382082	20382958	20365297	20382943	20358945
WHB10653	MEC	Maxwell RSC Blood DNA Kit (AS1400)	NEBNext UltraII DNA library Prep Kit for Illumina	20382082	20382958	20365297	20382943	20358945
WHB10654	MEC	Maxwell RSC Blood DNA Kit (AS1400)	NEBNext UltraII DNA library Prep Kit for Illumina	20382082	20382958	20365297	20382943	20358945
WHB10655	MEC	Maxwell RSC Blood DNA Kit (AS1400)	NEBNext UltraII DNA library Prep Kit for Illumina	20382082	20382958	20365297	20382943	20358945
WHB10656	MEC	Maxwell RSC Blood DNA Kit (AS1400)	NEBNext UltraII DNA library Prep Kit for Illumina	20382082	20382958	20365297	20382943	20358945
WHB10657	MEC	Maxwell RSC Blood DNA Kit (AS1400)	NEBNext UltraII DNA library Prep Kit for Illumina	20382082	20382958	20365297	20382943	20358945
WHB10658	MEC	Maxwell RSC Blood DNA Kit (AS1400)	NEBNext UltraII DNA library Prep Kit for Illumina	20382082	20382958	20365297	20382943	20358945
WHB10659	MEC	Maxwell RSC Blood DNA Kit (AS1400)	NEBNext UltraII DNA library Prep Kit for Illumina	20382082	20382958	20365297	20382943	20358945
WHB10660	HELIOS	Unknown	NEBNext UltraII DNA library Prep Kit for Illumina	Unknown	Unknown	Unknown	Unknown	Unknown
WHB10664	MEC	Maxwell RSC Blood DNA Kit (AS1400)	NEBNext UltraII DNA library Prep Kit for Illumina	20392972	20392975	20363660	20385639	20367085
WHB10665	MEC	Maxwell RSC Blood DNA Kit (AS1400)	NEBNext UltraII DNA library Prep Kit for Illumina	20392972	20392975	20363660	20385639	20367085
WHB10666	MEC	Maxwell RSC Blood DNA Kit (AS1400)	NEBNext UltraII DNA library Prep Kit for Illumina	20392972	20392975	20363660	20385639	20367085
WHB10667	MEC	Maxwell RSC Blood DNA Kit (AS1400)	NEBNext UltraII DNA library Prep Kit for Illumina	20392972	20392975	20363660	20385639	20367085
WHB10668	MEC	Maxwell RSC Blood DNA Kit (AS1400)	NEBNext UltraII DNA library Prep Kit for Illumina	20392972	20392975	20363660	20385639	20367085
WHB10669	MEC	Maxwell RSC Blood DNA Kit (AS1400)	NEBNext UltraII DNA library Prep Kit for Illumina	20392972	20392975	20363660	20385639	20367085
WHB10670	MEC	Maxwell RSC Blood DNA Kit (AS1400)	NEBNext UltraII DNA library Prep Kit for Illumina	20392972	20392975	20363660	20385639	20367085
WHB10671	MEC	Maxwell RSC Blood DNA Kit (AS1400)	NEBNext UltraII DNA library Prep Kit for Illumina	20392972	20392975	20363660	20385639	20367085
WHB10673	MEC	Maxwell RSC Blood DNA Kit (AS1400)	NEBNext UltraII DNA library Prep Kit for Illumina	20392972	20392975	20363660	20385639	20367085
WHB10674	MEC	Maxwell RSC Blood DNA Kit (AS1400)	NEBNext UltraII DNA library Prep Kit for Illumina	20392972	20392975	20363660	20385639	20367085
WHB10675	MEC	Maxwell RSC Blood DNA Kit (AS1400)	NEBNext UltraII DNA library Prep Kit for Illumina	20392972	20392975	20363660	20385639	20367085
WHB10676	MEC	Maxwell RSC Blood DNA Kit (AS1400)	NEBNext UltraII DNA library Prep Kit for Illumina	20392972	20392975	20363660	20385639	20367085
WHB10677	MEC	Maxwell RSC Blood DNA Kit (AS1400)	NEBNext UltraII DNA library Prep Kit for Illumina	20392972	20392975	20363660	20385639	20367085
WHB10678	MEC	Maxwell RSC Blood DNA Kit (AS1400)	NEBNext UltraII DNA library Prep Kit for Illumina	20392972	20392975	20363660	20385639	20367085
WHB10679	MEC	Maxwell RSC Blood DNA Kit (AS1400)	NEBNext UltraII DNA library Prep Kit for Illumina	20396095	20392975	20363660	20385639	20367085
WHB10680	MEC	Maxwell RSC Blood DNA Kit (AS1400)	NEBNext UltraII DNA library Prep Kit for Illumina	20392972	20392975	20363660	20385639	20367085
WHB10681	MEC	Maxwell RSC Blood DNA Kit (AS1400)	NEBNext UltraII DNA library Prep Kit for Illumina	20392972	20392975	20363660	20385639	20367085
WHB10682	MEC	Maxwell RSC Blood DNA Kit (AS1400)	NEBNext UltraII DNA library Prep Kit for Illumina	20392972	20392975	20363660	20385639	20367085
WHB10683	MEC	Maxwell RSC Blood DNA Kit (AS1400)	NEBNext UltraII DNA library Prep Kit for Illumina	20392972	20392975	20363660	20385639	20367085
WHB10684	MEC	Maxwell RSC Blood DNA Kit (AS1400)	NEBNext UltraII DNA library Prep Kit for Illumina	20396095	20392975	20363660	20385639	20367085
WHB10685	MEC	Maxwell RSC Blood DNA Kit (AS1400)	NEBNext UltraII DNA library Prep Kit for Illumina	20396095	20392975	20363660	20385639	20367085
WHB10686	MEC	Maxwell RSC Blood DNA Kit (AS1400)	NEBNext UltraII DNA library Prep Kit for Illumina	20392972	20392975	20363660	20385639	20367085
WHB10687	MEC	Maxwell RSC Blood DNA Kit (AS1400)	NEBNext UltraII DNA library Prep Kit for Illumina	20396095	20392975	20363660	20385639	20367085
WHB10688	MEC	Maxwell RSC Blood DNA Kit (AS1400)	NEBNext UltraII DNA library Prep Kit for Illumina	20396095	20392975	20363660	20385639	20367085
WHB10689	MEC	Maxwell RSC Blood DNA Kit (AS1400)	NEBNext UltraII DNA library Prep Kit for Illumina	20396095	20392975	20363660	20385639	20367085
WHB10690	MEC	Maxwell RSC Blood DNA Kit (AS1400)	NEBNext UltraII DNA library Prep Kit for Illumina	20396095	20392975	20363660	20385639	20367085
WHB10691	MEC	Maxwell RSC Blood DNA Kit (AS1400)	NEBNext UltraII DNA library Prep Kit for Illumina	20396095	20392975	20363660	20385639	20367085
WHB10692	MEC	Maxwell RSC Blood DNA Kit (AS1400)	NEBNext UltraII DNA library Prep Kit for Illumina	20396095	20392975	20363660	20385639	20367085
WHB10694	MEC	Maxwell RSC Blood DNA Kit (AS1400)	NEBNext UltraII DNA library Prep Kit for Illumina	20396095	20392975	20363660	20385639	20367085
WHB10695	MEC	Maxwell RSC Blood DNA Kit (AS1400)	NEBNext UltraII DNA library Prep Kit for Illumina	20396095	20392975	20363660	20385639	20367085
WHB10696	MEC	Maxwell RSC Blood DNA Kit (AS1400)	NEBNext UltraII DNA library Prep Kit for Illumina	20396095	20392975	20363660	20385639	20367085
WHB10699	MEC	Maxwell RSC Blood DNA Kit (AS1400)	NEBNext UltraII DNA library Prep Kit for Illumina	20396095	20392975	20363660	20385639	20367085
WHB10700	MEC	Maxwell RSC Blood DNA Kit (AS1400)	NEBNext UltraII DNA library Prep Kit for Illumina	20396095	20392975	20363660	20385639	20367085
WHB10701	MEC	Maxwell RSC Blood DNA Kit (AS1400)	NEBNext UltraII DNA library Prep Kit for Illumina	20396095	20392975	20363660	20385639	20367085
WHB10702	MEC	Maxwell RSC Blood DNA Kit (AS1400)	NEBNext UltraII DNA library Prep Kit for Illumina	20396095	20392975	20363660	20385639	20367085
WHB10703	MEC	Maxwell RSC Blood DNA Kit (AS1400)	NEBNext UltraII DNA library Prep Kit for Illumina	20396095	20392975	20363660	20385639	20367085
WHB10704	MEC	Maxwell RSC Blood DNA Kit (AS1400)	NEBNext UltraII DNA library Prep Kit for Illumina	20396095	20392975	20363660	20385639	20374867
WHB10705	MEC	Maxwell RSC Blood DNA Kit (AS1400)	NEBNext UltraII DNA library Prep Kit for Illumina	20396095	20392975	20363660	20385639	20374867
WHB10706	MEC	Maxwell RSC Blood DNA Kit (AS1400)	NEBNext UltraII DNA library Prep Kit for Illumina	20396095	20392975	20363660	20385639	20374867
WHB10707	MEC	Maxwell RSC Blood DNA Kit (AS1400)	NEBNext UltraII DNA library Prep Kit for Illumina	20396095	20392975	20363660	20385639	20374867
WHB10708	MEC	Maxwell RSC Blood DNA Kit (AS1400)	NEBNext UltraII DNA library Prep Kit for Illumina	20396095	20392975	20363660	20385639	20374867
WHB10709	MEC	Maxwell RSC Blood DNA Kit (AS1400)	NEBNext UltraII DNA library Prep Kit for Illumina	20396095	20392975	20363660	20385639	20374867
WHB10710	MEC	Maxwell RSC Blood DNA Kit (AS1400)	NEBNext UltraII DNA library Prep Kit for Illumina	20396095	20392975	20363660	20385639	20374867
WHB10712	MEC	Maxwell RSC Blood DNA Kit (AS1400)	NEBNext UltraII DNA library Prep Kit for Illumina	20396095	20392975	20363660	20385639	20374867
WHB10714	MEC	Maxwell RSC Blood DNA Kit (AS1400)	NEBNext UltraII DNA library Prep Kit for Illumina	20396095	20392975	20363660	20385639	20374867
WHB10715	MEC	Maxwell RSC Blood DNA Kit (AS1400)	NEBNext UltraII DNA library Prep Kit for Illumina	20396095	20392975	20363660	20385639	20374867
WHB10716	MEC	Maxwell RSC Blood DNA Kit (AS1400)	NEBNext UltraII DNA library Prep Kit for Illumina	20396095	20392975	20363660	20385639	20374867
WHB10717	MEC	Maxwell RSC Blood DNA Kit (AS1400)	NEBNext UltraII DNA library Prep Kit for Illumina	20396095	20392975	20363660	20385639	20374867
WHB10718	MEC	Maxwell RSC Blood DNA Kit (AS1400)	NEBNext UltraII DNA library Prep Kit for Illumina	20396095	20392975	20363660	20385639	20374867
WHB10720	MEC	Maxwell RSC Blood DNA Kit (AS1400)	NEBNext UltraII DNA library Prep Kit for Illumina	20396095	20392975	20363660	20385639	20374867
WHB10721	MEC	Maxwell RSC Blood DNA Kit (AS1400)	NEBNext UltraII DNA library Prep Kit for Illumina	20396095	20392975	20363660	20385639	20374867
WHB10722	MEC	Maxwell RSC Blood DNA Kit (AS1400)	NEBNext UltraII DNA library Prep Kit for Illumina	20396095	20392975	20363660	20385639	20374867
WHB10723	MEC	Maxwell RSC Blood DNA Kit (AS1400)	NEBNext UltraII DNA library Prep Kit for Illumina	20396095	20392975	20363660	20385639	20374867
WHB10724	MEC	Maxwell RSC Blood DNA Kit (AS1400)	NEBNext UltraII DNA library Prep Kit for Illumina	20396095	20392975	20363660	20385639	20374867
WHB10725	MEC	Maxwell RSC Blood DNA Kit (AS1400)	NEBNext UltraII DNA library Prep Kit for Illumina	20396095	20392975	20363660	20385639	20374867
WHB10726	MEC	Maxwell RSC Blood DNA Kit (AS1400)	NEBNext UltraII DNA library Prep Kit for Illumina	20385649	20392975	20363660	20385639	20367085
WHB10727	MEC	Maxwell RSC Blood DNA Kit (AS1400)	NEBNext UltraII DNA library Prep Kit for Illumina	20385649	20392975	20363660	20385639	20367085
WHB10728	MEC	Maxwell RSC Blood DNA Kit (AS1400)	NEBNext UltraII DNA library Prep Kit for Illumina	20385649	20392975	20363660	20385639	20367085
WHB10729	MEC	Maxwell RSC Blood DNA Kit (AS1400)	NEBNext UltraII DNA library Prep Kit for Illumina	20385649	20392975	20363660	20385639	20367085
WHB10730	MEC	Maxwell RSC Blood DNA Kit (AS1400)	NEBNext UltraII DNA library Prep Kit for Illumina	20385649	20392975	20363660	20385639	20367085
WHB10731	MEC	Maxwell RSC Blood DNA Kit (AS1400)	NEBNext UltraII DNA library Prep Kit for Illumina	20385649	20392975	20363660	20385639	20367085
WHB10732	MEC	Maxwell RSC Blood DNA Kit (AS1400)	NEBNext UltraII DNA library Prep Kit for Illumina	20385649	20392975	20363660	20385639	20367085
WHB10733	MEC	Maxwell RSC Blood DNA Kit (AS1400)	NEBNext UltraII DNA library Prep Kit for Illumina	20385649	20392975	20363660	20385639	20367085
WHB10734	MEC	Maxwell RSC Blood DNA Kit (AS1400)	NEBNext UltraII DNA library Prep Kit for Illumina	20385649	20392975	20363660	20385639	20367085
WHB10735	MEC	Maxwell RSC Blood DNA Kit (AS1400)	NEBNext UltraII DNA library Prep Kit for Illumina	20385649	20392975	20363660	20385639	20367085
WHB10736	MEC	Maxwell RSC Blood DNA Kit (AS1400)	NEBNext UltraII DNA library Prep Kit for Illumina	20385649	20392975	20363660	20385639	20367085
WHB10737	MEC	Maxwell RSC Blood DNA Kit (AS1400)	NEBNext UltraII DNA library Prep Kit for Illumina	20385649	20392975	20363660	20385639	20367085
WHB10738	MEC	Maxwell RSC Blood DNA Kit (AS1400)	NEBNext UltraII DNA library Prep Kit for Illumina	20385649	20392975	20363660	20385639	20367085
WHB10739	MEC	Maxwell RSC Blood DNA Kit (AS1400)	NEBNext UltraII DNA library Prep Kit for Illumina	20385649	20392975	20363660	20385639	20367085
WHB10740	MEC	Maxwell RSC Blood DNA Kit (AS1400)	NEBNext UltraII DNA library Prep Kit for Illumina	20385649	20392975	20363660	20385639	20367085
WHB10741	MEC	Maxwell RSC Blood DNA Kit (AS1400)	NEBNext UltraII DNA library Prep Kit for Illumina	20385649	20392975	20363660	20385639	20367085
WHB10742	MEC	Maxwell RSC Blood DNA Kit (AS1400)	NEBNext UltraII DNA library Prep Kit for Illumina	20385649	20392975	20363660	20385639	20367085
WHB10743	MEC	Maxwell RSC Blood DNA Kit (AS1400)	NEBNext UltraII DNA library Prep Kit for Illumina	20385649	20392975	20363660	20385639	20367085
WHB10744	MEC	Maxwell RSC Blood DNA Kit (AS1400)	NEBNext UltraII DNA library Prep Kit for Illumina	20385649	20392975	20363660	20385639	20367085
WHB10745	MEC	Maxwell RSC Blood DNA Kit (AS1400)	NEBNext UltraII DNA library Prep Kit for Illumina	20385649	20392975	20363660	20385639	20367085
WHB10746	MEC	Maxwell RSC Blood DNA Kit (AS1400)	NEBNext UltraII DNA library Prep Kit for Illumina	20385649	20392975	20363660	20385639	20395425
WHB10747	MEC	Maxwell RSC Blood DNA Kit (AS1400)	NEBNext UltraII DNA library Prep Kit for Illumina	20385649	20392975	20363660	20385639	20395425
WHB10748	MEC	Maxwell RSC Blood DNA Kit (AS1400)	NEBNext UltraII DNA library Prep Kit for Illumina	20385649	20392975	20363660	20385639	20395425
WHB10749	MEC	Maxwell RSC Blood DNA Kit (AS1400)	NEBNext UltraII DNA library Prep Kit for Illumina	20385649	20392975	20363660	20385639	20395425
WHB10750	MEC	Maxwell RSC Blood DNA Kit (AS1400)	NEBNext UltraII DNA library Prep Kit for Illumina	20385649	20392975	20363660	20385639	20395425
WHB10751	MEC	Maxwell RSC Blood DNA Kit (AS1400)	NEBNext UltraII DNA library Prep Kit for Illumina	20385649	20392975	20363660	20385639	20395425
WHB10752	MEC	Maxwell RSC Blood DNA Kit (AS1400)	NEBNext UltraII DNA library Prep Kit for Illumina	20385649	20392975	20363660	20385639	20395425
WHB10753	MEC	Maxwell RSC Blood DNA Kit (AS1400)	NEBNext UltraII DNA library Prep Kit for Illumina	20385649	20392975	20363660	20385639	20395425
WHB10754	MEC	Maxwell RSC Blood DNA Kit (AS1400)	NEBNext UltraII DNA library Prep Kit for Illumina	20385649	20392975	20363660	20385639	20395425
WHB10755	MEC	Maxwell RSC Blood DNA Kit (AS1400)	NEBNext UltraII DNA library Prep Kit for Illumina	20385649	20392975	20363660	20385639	20395425
WHB10758	MEC	Maxwell RSC Blood DNA Kit (AS1400)	NEBNext UltraII DNA library Prep Kit for Illumina	20385649	20392975	20363660	20385639	20395425
WHB10759	MEC	Maxwell RSC Blood DNA Kit (AS1400)	NEBNext UltraII DNA library Prep Kit for Illumina	20385649	20392975	20363660	20385639	20395425
WHB10760	MEC	Maxwell RSC Blood DNA Kit (AS1400)	NEBNext UltraII DNA library Prep Kit for Illumina	20392970	20393199	20368191	20392969	20393560
WHB10761	MEC	Maxwell RSC Blood DNA Kit (AS1400)	NEBNext UltraII DNA library Prep Kit for Illumina	20396283	20393199	20368191	20392969	20393560
WHB10763	MEC	Maxwell RSC Blood DNA Kit (AS1400)	NEBNext UltraII DNA library Prep Kit for Illumina	20396283	20393199	20368191	20392969	20393560
WHB10764	MEC	Maxwell RSC Blood DNA Kit (AS1400)	NEBNext UltraII DNA library Prep Kit for Illumina	20396283	20393199	20368191	20392969	20393560
WHB10765	MEC	Maxwell RSC Blood DNA Kit (AS1400)	NEBNext UltraII DNA library Prep Kit for Illumina	20396283	20393199	20368191	20392969	20393560
WHB10766	MEC	Maxwell RSC Blood DNA Kit (AS1400)	NEBNext UltraII DNA library Prep Kit for Illumina	20396283	20393199	20368191	20392969	20393560
WHB10767	MEC	Maxwell RSC Blood DNA Kit (AS1400)	NEBNext UltraII DNA library Prep Kit for Illumina	20396283	20393199	20368191	20392969	20393560
WHB10768	MEC	Maxwell RSC Blood DNA Kit (AS1400)	NEBNext UltraII DNA library Prep Kit for Illumina	20396283	20393199	20368191	20392969	20393560
WHB10769	MEC	Maxwell RSC Blood DNA Kit (AS1400)	NEBNext UltraII DNA library Prep Kit for Illumina	20396283	20393199	20368191	20392969	20393560
WHB10770	MEC	Maxwell RSC Blood DNA Kit (AS1400)	NEBNext UltraII DNA library Prep Kit for Illumina	20396283	20393199	20368191	20392969	20393560
WHB10771	MEC	Maxwell RSC Blood DNA Kit (AS1400)	NEBNext UltraII DNA library Prep Kit for Illumina	20396283	20393199	20368191	20392969	20393560
WHB10773	MEC	Maxwell RSC Blood DNA Kit (AS1400)	NEBNext UltraII DNA library Prep Kit for Illumina	20396283	20393199	20368191	20392969	20393560
WHB10774	MEC	Maxwell RSC Blood DNA Kit (AS1400)	NEBNext UltraII DNA library Prep Kit for Illumina	20396283	20393199	20368191	20392969	20393560
WHB10775	MEC	Maxwell RSC Blood DNA Kit (AS1400)	NEBNext UltraII DNA library Prep Kit for Illumina	20396283	20393199	20368191	20392969	20393560
WHB10776	MEC	Maxwell RSC Blood DNA Kit (AS1400)	NEBNext UltraII DNA library Prep Kit for Illumina	20396283	20393199	20368191	20392969	20393560
WHB10777	MEC	Maxwell RSC Blood DNA Kit (AS1400)	NEBNext UltraII DNA library Prep Kit for Illumina	20396283	20393199	20368191	20392969	20393560
WHB10778	MEC	Maxwell RSC Blood DNA Kit (AS1400)	NEBNext UltraII DNA library Prep Kit for Illumina	20396283	20393199	20368191	20392969	20393560
WHB10779	MEC	Maxwell RSC Blood DNA Kit (AS1400)	NEBNext UltraII DNA library Prep Kit for Illumina	20396283	20393199	20368191	20392969	20393560
WHB10780	MEC	Maxwell RSC Blood DNA Kit (AS1400)	NEBNext UltraII DNA library Prep Kit for Illumina	20396283	20393199	20368191	20392969	20393560
WHB10781	MEC	Maxwell RSC Blood DNA Kit (AS1400)	NEBNext UltraII DNA library Prep Kit for Illumina	20396283	20393199	20368191	20392969	20393560
WHB10782	MEC	Maxwell RSC Blood DNA Kit (AS1400)	NEBNext UltraII DNA library Prep Kit for Illumina	20396283	20393199	20368191	20392969	20393560
WHB10783	MEC	Maxwell RSC Blood DNA Kit (AS1400)	NEBNext UltraII DNA library Prep Kit for Illumina	20396283	20393199	20368191	20392969	20393560
WHB10785	MEC	Maxwell RSC Blood DNA Kit (AS1400)	NEBNext UltraII DNA library Prep Kit for Illumina	20396283	20393199	20368191	20392969	20393560
WHB10786	MEC	Maxwell RSC Blood DNA Kit (AS1400)	NEBNext UltraII DNA library Prep Kit for Illumina	20396283	20393199	20368191	20392969	20393560
WHB10787	MEC	Maxwell RSC Blood DNA Kit (AS1400)	NEBNext UltraII DNA library Prep Kit for Illumina	20396283	20393199	20368191	20392969	20393560
WHB10788	MEC	Maxwell RSC Blood DNA Kit (AS1400)	NEBNext UltraII DNA library Prep Kit for Illumina	20396283	20393199	20368191	20392969	20393560
WHB10790	MEC	Maxwell RSC Blood DNA Kit (AS1400)	NEBNext UltraII DNA library Prep Kit for Illumina	20396283	20393199	20368191	20392969	20393560
WHB10791	MEC	Maxwell RSC Blood DNA Kit (AS1400)	NEBNext UltraII DNA library Prep Kit for Illumina	20396283	20393199	20368191	20392969	20393560
WHB10792	MEC	Maxwell RSC Blood DNA Kit (AS1400)	NEBNext UltraII DNA library Prep Kit for Illumina	20396283	20393199	20368191	20392969	20393560
WHB10793	MEC	Maxwell RSC Blood DNA Kit (AS1400)	NEBNext UltraII DNA library Prep Kit for Illumina	20396283	20393199	20368191	20392969	20393560
WHB10794	MEC	Maxwell RSC Blood DNA Kit (AS1400)	NEBNext UltraII DNA library Prep Kit for Illumina	20396283	20393199	20368191	20392969	20393560
WHB10795	MEC	Maxwell RSC Blood DNA Kit (AS1400)	NEBNext UltraII DNA library Prep Kit for Illumina	20396283	20393199	20368191	20392969	20393560
WHB10796	MEC	Maxwell RSC Blood DNA Kit (AS1400)	NEBNext UltraII DNA library Prep Kit for Illumina	20392970	20393199	20368191	20385639	20395425
WHB10797	MEC	Maxwell RSC Blood DNA Kit (AS1400)	NEBNext UltraII DNA library Prep Kit for Illumina	20392970	20393199	20368191	20385639	20395425
WHB10798	MEC	Maxwell RSC Blood DNA Kit (AS1400)	NEBNext UltraII DNA library Prep Kit for Illumina	20392970	20393199	20368191	20385639	20395425
WHB10799	MEC	Maxwell RSC Blood DNA Kit (AS1400)	NEBNext UltraII DNA library Prep Kit for Illumina	20392970	20393199	20368191	20385639	20395425
WHB10800	MEC	Maxwell RSC Blood DNA Kit (AS1400)	NEBNext UltraII DNA library Prep Kit for Illumina	20392970	20393199	20368191	20385639	20395425
WHB10801	MEC	Maxwell RSC Blood DNA Kit (AS1400)	NEBNext UltraII DNA library Prep Kit for Illumina	20392970	20393199	20368191	20385639	20395425
WHB10802	MEC	Maxwell RSC Blood DNA Kit (AS1400)	NEBNext UltraII DNA library Prep Kit for Illumina	20392970	20393199	20368191	20385639	20395425
WHB10803	MEC	Maxwell RSC Blood DNA Kit (AS1400)	NEBNext UltraII DNA library Prep Kit for Illumina	20392970	20393199	20368191	20385639	20395425
WHB10804	MEC	Maxwell RSC Blood DNA Kit (AS1400)	NEBNext UltraII DNA library Prep Kit for Illumina	20392970	20393199	20368191	20385639	20395425
WHB10805	MEC	Maxwell RSC Blood DNA Kit (AS1400)	NEBNext UltraII DNA library Prep Kit for Illumina	20392970	20393199	20368191	20385639	20395425
WHB10806	MEC	Maxwell RSC Blood DNA Kit (AS1400)	NEBNext UltraII DNA library Prep Kit for Illumina	20392970	20393199	20368191	20385639	20395425
WHB10809	MEC	Maxwell RSC Blood DNA Kit (AS1400)	NEBNext UltraII DNA library Prep Kit for Illumina	20392970	20393199	20368191	20385639	20395425
WHB10810	MEC	Maxwell RSC Blood DNA Kit (AS1400)	NEBNext UltraII DNA library Prep Kit for Illumina	20392970	20393199	20368191	20385639	20395425
WHB10811	MEC	Maxwell RSC Blood DNA Kit (AS1400)	NEBNext UltraII DNA library Prep Kit for Illumina	20392970	20393199	20368191	20385639	20395425
WHB10812	MEC	Maxwell RSC Blood DNA Kit (AS1400)	NEBNext UltraII DNA library Prep Kit for Illumina	20392970	20393199	20368191	20385639	20395425
WHB10813	MEC	Maxwell RSC Blood DNA Kit (AS1400)	NEBNext UltraII DNA library Prep Kit for Illumina	20392970	20393199	20368191	20385639	20395425
WHB10814	MEC	Maxwell RSC Blood DNA Kit (AS1400)	NEBNext UltraII DNA library Prep Kit for Illumina	20392970	20393199	20368191	20385639	20395425
WHB10815	MEC	Maxwell RSC Blood DNA Kit (AS1400)	NEBNext UltraII DNA library Prep Kit for Illumina	20392970	20393199	20368191	20385639	20393560
WHB10816	MEC	Maxwell RSC Blood DNA Kit (AS1400)	NEBNext UltraII DNA library Prep Kit for Illumina	20392970	20393199	20368191	20385639	20393560
WHB10817	MEC	Maxwell RSC Blood DNA Kit (AS1400)	NEBNext UltraII DNA library Prep Kit for Illumina	20392970	20393199	20368191	20385639	20395425
WHB10818	MEC	Maxwell RSC Blood DNA Kit (AS1400)	NEBNext UltraII DNA library Prep Kit for Illumina	20392970	20393199	20368191	20385639	20393560
WHB10819	MEC	Maxwell RSC Blood DNA Kit (AS1400)	NEBNext UltraII DNA library Prep Kit for Illumina	20392970	20393199	20368191	20385639	20393560
WHB10820	MEC	Maxwell RSC Blood DNA Kit (AS1400)	NEBNext UltraII DNA library Prep Kit for Illumina	20392970	20393199	20368191	20385639	20393560
WHB10821	MEC	Maxwell RSC Blood DNA Kit (AS1400)	NEBNext UltraII DNA library Prep Kit for Illumina	20392970	20393199	20368191	20385639	20393560
WHB10822	MEC	Maxwell RSC Blood DNA Kit (AS1400)	NEBNext UltraII DNA library Prep Kit for Illumina	20392970	20393199	20368191	20385639	20393560
WHB10823	MEC	Maxwell RSC Blood DNA Kit (AS1400)	NEBNext UltraII DNA library Prep Kit for Illumina	20392970	20393199	20368191	20385639	20393560
WHB10824	MEC	Maxwell RSC Blood DNA Kit (AS1400)	NEBNext UltraII DNA library Prep Kit for Illumina	20392970	20393199	20368191	20385639	20393560
WHB10825	MEC	Maxwell RSC Blood DNA Kit (AS1400)	NEBNext UltraII DNA library Prep Kit for Illumina	20392970	20393199	20368191	20385639	20393560
WHB10826	MEC	Maxwell RSC Blood DNA Kit (AS1400)	NEBNext UltraII DNA library Prep Kit for Illumina	20392970	20393199	20368191	20385639	20393560
WHB10827	MEC	Maxwell RSC Blood DNA Kit (AS1400)	NEBNext UltraII DNA library Prep Kit for Illumina	20392970	20393199	20368191	20385639	20393560
WHB10828	MEC	Maxwell RSC Blood DNA Kit (AS1400)	NEBNext UltraII DNA library Prep Kit for Illumina	20392970	20393199	20368191	20385639	20393560
WHB10829	MEC	Maxwell RSC Blood DNA Kit (AS1400)	NEBNext UltraII DNA library Prep Kit for Illumina	20392970	20393199	20368191	20385639	20393560
WHB10830	MEC	Maxwell RSC Blood DNA Kit (AS1400)	NEBNext UltraII DNA library Prep Kit for Illumina	20392970	20393199	20368191	20385639	20393560
WHB10831	MEC	Maxwell RSC Blood DNA Kit (AS1400)	NEBNext UltraII DNA library Prep Kit for Illumina	20392970	20393199	20368191	20385639	20393560
WHB10832	MEC	Maxwell RSC Blood DNA Kit (AS1400)	NEBNext UltraII DNA library Prep Kit for Illumina	20392970	20393199	20368191	20385639	20393560
WHB10833	MEC	Maxwell RSC Blood DNA Kit (AS1400)	NEBNext UltraII DNA library Prep Kit for Illumina	20392970	20393199	20368191	20385639	20393560
WHB10834	MEC	Maxwell RSC Blood DNA Kit (AS1400)	NEBNext UltraII DNA library Prep Kit for Illumina	20392970	20393199	20368191	20385639	20393560
WHB10835	MEC	Maxwell RSC Blood DNA Kit (AS1400)	NEBNext UltraII DNA library Prep Kit for Illumina	20392970	20393199	20368191	20385639	20393560
WHB10836	MEC	Maxwell RSC Blood DNA Kit (AS1400)	NEBNext UltraII DNA library Prep Kit for Illumina	20392970	20393199	20368191	20392969	20393560
WHB10837	MEC	Maxwell RSC Blood DNA Kit (AS1400)	NEBNext UltraII DNA library Prep Kit for Illumina	20392970	20393199	20368191	20392969	20393560
WHB10838	MEC	Maxwell RSC Blood DNA Kit (AS1400)	NEBNext UltraII DNA library Prep Kit for Illumina	20392970	20393199	20368191	20392969	20393560
WHB10839	MEC	Maxwell RSC Blood DNA Kit (AS1400)	NEBNext UltraII DNA library Prep Kit for Illumina	20392970	20393199	20368191	20392969	20393560
WHB10840	MEC	Maxwell RSC Blood DNA Kit (AS1400)	NEBNext UltraII DNA library Prep Kit for Illumina	20392970	20393199	20368191	20392969	20393560
WHB10841	MEC	Maxwell RSC Blood DNA Kit (AS1400)	NEBNext UltraII DNA library Prep Kit for Illumina	20392970	20393199	20368191	20392969	20393560
WHB10842	MEC	Maxwell RSC Blood DNA Kit (AS1400)	NEBNext UltraII DNA library Prep Kit for Illumina	20392970	20393199	20368191	20392969	20393560
WHB10843	MEC	Maxwell RSC Blood DNA Kit (AS1400)	NEBNext UltraII DNA library Prep Kit for Illumina	20392970	20393199	20368191	20392969	20393560
WHB10845	MEC	Maxwell RSC Blood DNA Kit (AS1400)	NEBNext UltraII DNA library Prep Kit for Illumina	20392970	20393199	20368191	20392969	20393560
WHB10846	MEC	Maxwell RSC Blood DNA Kit (AS1400)	NEBNext UltraII DNA library Prep Kit for Illumina	20392970	20393199	20368191	20392969	20393560
WHB10847	MEC	Maxwell RSC Blood DNA Kit (AS1400)	NEBNext UltraII DNA library Prep Kit for Illumina	20392970	20393199	20368191	20392969	20393560
WHB10848	MEC	Maxwell RSC Blood DNA Kit (AS1400)	NEBNext UltraII DNA library Prep Kit for Illumina	20392970	20393199	20368191	20392969	20393560
WHB10849	MEC	Maxwell RSC Blood DNA Kit (AS1400)	NEBNext UltraII DNA library Prep Kit for Illumina	20392970	20393199	20368191	20392969	20393560
WHB10850	MEC	Maxwell RSC Blood DNA Kit (AS1400)	NEBNext UltraII DNA library Prep Kit for Illumina	20392970	20393199	20368191	20392969	20393560
WHB10852	MEC	Maxwell RSC Blood DNA Kit (AS1400)	NEBNext UltraII DNA library Prep Kit for Illumina	20392970	20393199	20368191	20392969	20393560
WHB10853	MEC	Maxwell RSC Blood DNA Kit (AS1400)	NEBNext UltraII DNA library Prep Kit for Illumina	20392970	20393199	20368191	20392969	20393560
WHB10854	MEC	Maxwell RSC Blood DNA Kit (AS1400)	NEBNext UltraII DNA library Prep Kit for Illumina	20392970	20393199	20368191	20392969	20393560
WHB10855	MEC	Maxwell RSC Blood DNA Kit (AS1400)	NEBNext UltraII DNA library Prep Kit for Illumina	20392970	20393199	20368191	20392969	20393560
WHB10856	MEC	Maxwell RSC Blood DNA Kit (AS1400)	NEBNext UltraII DNA library Prep Kit for Illumina	20396283	20393199	20368191	20392969	20393560
WHB10857	MEC	Maxwell RSC Blood DNA Kit (AS1400)	NEBNext UltraII DNA library Prep Kit for Illumina	20396283	20393199	20368191	20392969	20393560
WHB10858	MEC	Maxwell RSC Blood DNA Kit (AS1400)	NEBNext UltraII DNA library Prep Kit for Illumina	20396283	20393199	20368191	20392969	20393560
WHB10859	MEC	Maxwell RSC Blood DNA Kit (AS1400)	NEBNext UltraII DNA library Prep Kit for Illumina	20396283	20393199	20368191	20392969	20393560
WHB10860	MEC	Maxwell RSC Blood DNA Kit (AS1400)	NEBNext UltraII DNA library Prep Kit for Illumina	20396283	20393199	20368191	20392969	20393560
WHB10861	MEC	Maxwell RSC Blood DNA Kit (AS1400)	NEBNext UltraII DNA library Prep Kit for Illumina	20396283	20393199	20368191	20392969	20393560
WHB10862	MEC	Maxwell RSC Blood DNA Kit (AS1400)	NEBNext UltraII DNA library Prep Kit for Illumina	20396283	20393199	20368191	20392969	20393560
WHB10863	MEC	Maxwell RSC Blood DNA Kit (AS1400)	NEBNext UltraII DNA library Prep Kit for Illumina	20396283	20393199	20368191	20392969	20393560
WHB10864	MEC	Maxwell RSC Blood DNA Kit (AS1400)	NEBNext UltraII DNA library Prep Kit for Illumina	20396283	20393199	20368191	20392969	20393560
WHB10865	MEC	Maxwell RSC Blood DNA Kit (AS1400)	NEBNext UltraII DNA library Prep Kit for Illumina	20396283	20393199	20368191	20392969	20393560
WHB10866	MEC	Maxwell RSC Blood DNA Kit (AS1400)	NEBNext UltraII DNA library Prep Kit for Illumina	20396283	20393199	20368191	20392969	20393560
WHB10867	MEC	Maxwell RSC Blood DNA Kit (AS1400)	NEBNext UltraII DNA library Prep Kit for Illumina	20396283	20393199	20368191	20392969	20393560
WHB10868	MEC	Maxwell RSC Blood DNA Kit (AS1400)	NEBNext UltraII DNA library Prep Kit for Illumina	20396283	20393199	20368191	20392969	20393560
WHB10869	MEC	Maxwell RSC Blood DNA Kit (AS1400)	NEBNext UltraII DNA library Prep Kit for Illumina	20396283	20393199	20368191	20392969	20393560
WHB10870	MEC	Maxwell RSC Blood DNA Kit (AS1400)	NEBNext UltraII DNA library Prep Kit for Illumina	20396283	20393199	20368191	20392969	20393560
WHB10871	MEC	Maxwell RSC Blood DNA Kit (AS1400)	NEBNext UltraII DNA library Prep Kit for Illumina	20396283	20393199	20368191	20392969	20393560
WHB10872	MEC	Maxwell RSC Blood DNA Kit (AS1400)	NEBNext UltraII DNA library Prep Kit for Illumina	20396283	20393199	20368191	20392969	20393560
WHB10873	MEC	Maxwell RSC Blood DNA Kit (AS1400)	NEBNext UltraII DNA library Prep Kit for Illumina	20396283	20393199	20368191	20392969	20393560
WHB10874	MEC	Maxwell RSC Blood DNA Kit (AS1400)	NEBNext UltraII DNA library Prep Kit for Illumina	20396283	20393199	20368191	20392969	20393560
WHB10875	MEC	Maxwell RSC Blood DNA Kit (AS1400)	NEBNext UltraII DNA library Prep Kit for Illumina	20396283	20393199	20368191	20392969	20393560
WHB10876	MEC	Maxwell RSC Blood DNA Kit (AS1400)	NEBNext UltraII DNA library Prep Kit for Illumina	20396283	20393199	20368191	20392969	20393560
WHB10877	MEC	Maxwell RSC Blood DNA Kit (AS1400)	NEBNext UltraII DNA library Prep Kit for Illumina	20396283	20393199	20368191	20392969	20393560
WHB10878	MEC	Maxwell RSC Blood DNA Kit (AS1400)	NEBNext UltraII DNA library Prep Kit for Illumina	20396283	20393199	20368191	20392969	20393560
WHB10879	MEC	Maxwell RSC Blood DNA Kit (AS1400)	NEBNext UltraII DNA library Prep Kit for Illumina	20396283	20393199	20368191	20392969	20393560
WHB10880	MEC	Maxwell RSC Blood DNA Kit (AS1400)	NEBNext UltraII DNA library Prep Kit for Illumina	20396283	20393199	20368191	20392969	20393560
WHB10881	MEC	Maxwell RSC Blood DNA Kit (AS1400)	NEBNext UltraII DNA library Prep Kit for Illumina	20396283	20393199	20368191	20392969	20393560
WHB10882	MEC	Maxwell RSC Blood DNA Kit (AS1400)	NEBNext UltraII DNA library Prep Kit for Illumina	20396283	20393199	20368191	20392969	20393560
WHB10883	MEC	Maxwell RSC Blood DNA Kit (AS1400)	NEBNext UltraII DNA library Prep Kit for Illumina	20396095	20393199	20368191	20392969	20393560
WHB10884	MEC	Maxwell RSC Blood DNA Kit (AS1400)	NEBNext UltraII DNA library Prep Kit for Illumina	20396095	20393199	20368191	20392969	20393560
WHB10885	MEC	Maxwell RSC Blood DNA Kit (AS1400)	NEBNext UltraII DNA library Prep Kit for Illumina	20396095	20393199	20368191	20392969	20393560
WHB10886	MEC	Maxwell RSC Blood DNA Kit (AS1400)	NEBNext UltraII DNA library Prep Kit for Illumina	20396095	20393199	20368191	20392969	20393560
WHB10887	MEC	Maxwell RSC Blood DNA Kit (AS1400)	NEBNext UltraII DNA library Prep Kit for Illumina	20396095	20393199	20368191	20392969	20393560
WHB10888	MEC	Maxwell RSC Blood DNA Kit (AS1400)	NEBNext UltraII DNA library Prep Kit for Illumina	20396095	20393199	20368191	20392969	20393560
WHB10889	MEC	Maxwell RSC Blood DNA Kit (AS1400)	NEBNext UltraII DNA library Prep Kit for Illumina	20396095	20393199	20368191	20392969	20393560
WHB10890	MEC	Maxwell RSC Blood DNA Kit (AS1400)	NEBNext UltraII DNA library Prep Kit for Illumina	20396095	20393199	20368191	20392969	20393560
WHB10891	MEC	Maxwell RSC Blood DNA Kit (AS1400)	NEBNext UltraII DNA library Prep Kit for Illumina	20396095	20393199	20368191	20392969	20393560
WHB10892	MEC	Maxwell RSC Blood DNA Kit (AS1400)	NEBNext UltraII DNA library Prep Kit for Illumina	20396095	20393199	20368191	20392969	20393560
WHB10893	MEC	Maxwell RSC Blood DNA Kit (AS1400)	NEBNext UltraII DNA library Prep Kit for Illumina	20396095	20393199	20368191	20392969	20393560
WHB10894	MEC	Maxwell RSC Blood DNA Kit (AS1400)	NEBNext UltraII DNA library Prep Kit for Illumina	20396095	20393199	20368191	20392969	20393560
WHB10895	MEC	Maxwell RSC Blood DNA Kit (AS1400)	NEBNext UltraII DNA library Prep Kit for Illumina	20396095	20393199	20368191	20392969	20393560
WHB10896	MEC	Maxwell RSC Blood DNA Kit (AS1400)	NEBNext UltraII DNA library Prep Kit for Illumina	20396095	20393199	20368191	20392969	20393560
WHB10897	MEC	Maxwell RSC Blood DNA Kit (AS1400)	NEBNext UltraII DNA library Prep Kit for Illumina	20396095	20393199	20368191	20392969	20393560
WHB10898	MEC	Maxwell RSC Blood DNA Kit (AS1400)	NEBNext UltraII DNA library Prep Kit for Illumina	20396095	20393199	20368191	20392969	20393560
WHB10899	MEC	Maxwell RSC Blood DNA Kit (AS1400)	NEBNext UltraII DNA library Prep Kit for Illumina	20396095	20393199	20368191	20392969	20393560
WHB10900	MEC	Maxwell RSC Blood DNA Kit (AS1400)	NEBNext UltraII DNA library Prep Kit for Illumina	20396095	20393199	20368191	20392969	20393560
WHB10901	MEC	Maxwell RSC Blood DNA Kit (AS1400)	NEBNext UltraII DNA library Prep Kit for Illumina	20396095	20393199	20368191	20392969	20393560
WHB10902	MEC	Maxwell RSC Blood DNA Kit (AS1400)	NEBNext UltraII DNA library Prep Kit for Illumina	20396095	20393199	20368191	20392969	20393560
WHB10903	MEC	Maxwell RSC Blood DNA Kit (AS1400)	NEBNext UltraII DNA library Prep Kit for Illumina	20392972	20393199	20368191	20392969	20393560
WHB10904	MEC	Maxwell RSC Blood DNA Kit (AS1400)	NEBNext UltraII DNA library Prep Kit for Illumina	20392972	20393199	20368191	20392969	20393560
WHB10905	MEC	Maxwell RSC Blood DNA Kit (AS1400)	NEBNext UltraII DNA library Prep Kit for Illumina	20392972	20393199	20368191	20392969	20393560
WHB10906	MEC	Maxwell RSC Blood DNA Kit (AS1400)	NEBNext UltraII DNA library Prep Kit for Illumina	20392972	20393199	20368191	20392969	20393560
WHB10907	MEC	Maxwell RSC Blood DNA Kit (AS1400)	NEBNext UltraII DNA library Prep Kit for Illumina	20392972	20393199	20368191	20392969	20393560
WHB10908	MEC	Maxwell RSC Blood DNA Kit (AS1400)	NEBNext UltraII DNA library Prep Kit for Illumina	20392972	20393199	20368191	20392969	20393560
WHB10909	MEC	Maxwell RSC Blood DNA Kit (AS1400)	NEBNext UltraII DNA library Prep Kit for Illumina	20392972	20393199	20368191	20392969	20393560
WHB10910	MEC	Maxwell RSC Blood DNA Kit (AS1400)	NEBNext UltraII DNA library Prep Kit for Illumina	20392972	20393199	20368191	20392969	20393560
WHB10911	MEC	Maxwell RSC Blood DNA Kit (AS1400)	NEBNext UltraII DNA library Prep Kit for Illumina	20392972	20393199	20368191	20392969	20393560
WHB10912	MEC	Maxwell RSC Blood DNA Kit (AS1400)	NEBNext UltraII DNA library Prep Kit for Illumina	20392972	20393199	20368191	20392969	20393560
WHB10913	MEC	Maxwell RSC Blood DNA Kit (AS1400)	NEBNext UltraII DNA library Prep Kit for Illumina	20392972	20393199	20368191	20392969	20393560
WHB10916	MEC	Maxwell RSC Blood DNA Kit (AS1400)	NEBNext UltraII DNA library Prep Kit for Illumina	20392972	20393199	20368191	20392969	20393560
WHB10917	MEC	Maxwell RSC Blood DNA Kit (AS1400)	NEBNext UltraII DNA library Prep Kit for Illumina	20392972	20393199	20368191	20392969	20393560
WHB10918	MEC	Maxwell RSC Blood DNA Kit (AS1400)	NEBNext UltraII DNA library Prep Kit for Illumina	20392970	20393199	20368191	20392969	20393560
WHB10919	MEC	Maxwell RSC Blood DNA Kit (AS1400)	NEBNext UltraII DNA library Prep Kit for Illumina	20392972	20393199	20368191	20392969	20393560
WHB10920	MEC	Maxwell RSC Blood DNA Kit (AS1400)	NEBNext UltraII DNA library Prep Kit for Illumina	20392972	20393199	20368191	20392969	20393560
WHB10921	MEC	Maxwell RSC Blood DNA Kit (AS1400)	NEBNext UltraII DNA library Prep Kit for Illumina	20392972	20393199	20368191	20392969	20393560
WHB10922	MEC	Maxwell RSC Blood DNA Kit (AS1400)	NEBNext UltraII DNA library Prep Kit for Illumina	20392972	20393199	20368191	20392969	20393560
WHB10923	MEC	Maxwell RSC Blood DNA Kit (AS1400)	NEBNext UltraII DNA library Prep Kit for Illumina	20392972	20393199	20368191	20392969	20393560
WHB10924	MEC	Maxwell RSC Blood DNA Kit (AS1400)	NEBNext UltraII DNA library Prep Kit for Illumina	20392972	20393199	20368191	20392969	20393560
WHB10925	MEC	Maxwell RSC Blood DNA Kit (AS1400)	NEBNext UltraII DNA library Prep Kit for Illumina	20392970	20393199	20368191	20392969	20393560
WHB10926	MEC	Maxwell RSC Blood DNA Kit (AS1400)	NEBNext UltraII DNA library Prep Kit for Illumina	20392970	20393199	20368191	20392969	20393560
WHB10927	MEC	Maxwell RSC Blood DNA Kit (AS1400)	NEBNext UltraII DNA library Prep Kit for Illumina	20392970	20393199	20368191	20392969	20393560
WHB10928	MEC	Maxwell RSC Blood DNA Kit (AS1400)	NEBNext UltraII DNA library Prep Kit for Illumina	20392970	20393199	20368191	20392969	20393560
WHB10929	MEC	Maxwell RSC Blood DNA Kit (AS1400)	NEBNext UltraII DNA library Prep Kit for Illumina	20392970	20393199	20368191	20392969	20393560
WHB10930	MEC	Maxwell RSC Blood DNA Kit (AS1400)	NEBNext UltraII DNA library Prep Kit for Illumina	20392970	20393199	20368191	20392969	20393560
WHB10931	MEC	Maxwell RSC Blood DNA Kit (AS1400)	NEBNext UltraII DNA library Prep Kit for Illumina	20392970	20393199	20368191	20392969	20393560
WHB10932	MEC	Maxwell RSC Blood DNA Kit (AS1400)	NEBNext UltraII DNA library Prep Kit for Illumina	20392970	20393199	20368191	20392969	20393560
WHB10933	MEC	Maxwell RSC Blood DNA Kit (AS1400)	NEBNext UltraII DNA library Prep Kit for Illumina	20392970	20393199	20368191	20392969	20393560
WHB10934	MEC	Maxwell RSC Blood DNA Kit (AS1400)	NEBNext UltraII DNA library Prep Kit for Illumina	20392970	20393199	20368191	20392969	20393560
WHB10935	MEC	Maxwell RSC Blood DNA Kit (AS1400)	NEBNext UltraII DNA library Prep Kit for Illumina	20392970	20393199	20368191	20392969	20393560
WHB10936	MEC	Maxwell RSC Blood DNA Kit (AS1400)	NEBNext UltraII DNA library Prep Kit for Illumina	20392970	20393199	20368191	20392969	20393560
WHB10937	MEC	Maxwell RSC Blood DNA Kit (AS1400)	NEBNext UltraII DNA library Prep Kit for Illumina	20392970	20393199	20368191	20392969	20393560
WHB10938	MEC	Maxwell RSC Blood DNA Kit (AS1400)	NEBNext UltraII DNA library Prep Kit for Illumina	20392970	20393199	20368191	20392969	20393560
WHB10939	MEC	Maxwell RSC Blood DNA Kit (AS1400)	NEBNext UltraII DNA library Prep Kit for Illumina	20392970	20393199	20368191	20392969	20393560
WHB10940	MEC	Maxwell RSC Blood DNA Kit (AS1400)	NEBNext UltraII DNA library Prep Kit for Illumina	20392970	20393199	20368191	20392969	20393560
WHB10941	MEC	Maxwell RSC Blood DNA Kit (AS1400)	NEBNext UltraII DNA library Prep Kit for Illumina	20392970	20393199	20368191	20392969	20393560
WHB10942	MEC	Maxwell RSC Blood DNA Kit (AS1400)	NEBNext UltraII DNA library Prep Kit for Illumina	20392970	20393199	20368191	20392969	20393560
WHB10943	MEC	Maxwell RSC Blood DNA Kit (AS1400)	NEBNext UltraII DNA library Prep Kit for Illumina	20392970	20393199	20368191	20392969	20393560
WHB10944	MEC	Maxwell RSC Blood DNA Kit (AS1400)	NEBNext UltraII DNA library Prep Kit for Illumina	20396095	20393199	20368191	20392969	20393560
WHB10945	MEC	Maxwell RSC Blood DNA Kit (AS1400)	NEBNext UltraII DNA library Prep Kit for Illumina	20396095	20393199	20368191	20392969	20393560
WHB10946	MEC	Maxwell RSC Blood DNA Kit (AS1400)	NEBNext UltraII DNA library Prep Kit for Illumina	20396095	20393199	20368191	20392969	20393560
WHB10947	MEC	Maxwell RSC Blood DNA Kit (AS1400)	NEBNext UltraII DNA library Prep Kit for Illumina	20396095	20393199	20368191	20392969	20393560
WHB10948	MEC	Maxwell RSC Blood DNA Kit (AS1400)	NEBNext UltraII DNA library Prep Kit for Illumina	20396095	20393199	20368191	20392969	20393560
WHB10949	MEC	Maxwell RSC Blood DNA Kit (AS1400)	NEBNext UltraII DNA library Prep Kit for Illumina	20396095	20393199	20368191	20392969	20393560
WHB10950	MEC	Maxwell RSC Blood DNA Kit (AS1400)	NEBNext UltraII DNA library Prep Kit for Illumina	20396095	20393199	20368191	20392969	20393560
WHB10951	MEC	Maxwell RSC Blood DNA Kit (AS1400)	NEBNext UltraII DNA library Prep Kit for Illumina	20396095	20393199	20368191	20392969	20393560
WHB10952	MEC	Maxwell RSC Blood DNA Kit (AS1400)	NEBNext UltraII DNA library Prep Kit for Illumina	20396095	20393199	20368191	20392969	20393560
WHB10953	MEC	Maxwell RSC Blood DNA Kit (AS1400)	NEBNext UltraII DNA library Prep Kit for Illumina	20396095	20393199	20368191	20392969	20393560
WHB10954	MEC	Maxwell RSC Blood DNA Kit (AS1400)	NEBNext UltraII DNA library Prep Kit for Illumina	20396095	20393199	20368191	20392969	20393560
WHB10955	MEC	Maxwell RSC Blood DNA Kit (AS1400)	NEBNext UltraII DNA library Prep Kit for Illumina	20396095	20393199	20368191	20392969	20393560
WHB10956	MEC	Maxwell RSC Blood DNA Kit (AS1400)	NEBNext UltraII DNA library Prep Kit for Illumina	20396095	20393199	20368191	20392969	20393560
WHB10957	MEC	Maxwell RSC Blood DNA Kit (AS1400)	NEBNext UltraII DNA library Prep Kit for Illumina	20396095	20393199	20368191	20392969	20393560
WHB10958	MEC	Maxwell RSC Blood DNA Kit (AS1400)	NEBNext UltraII DNA library Prep Kit for Illumina	20396095	20393199	20368191	20392969	20393560
WHB10960	MEC	Maxwell RSC Blood DNA Kit (AS1400)	NEBNext UltraII DNA library Prep Kit for Illumina	20396095	20393199	20368191	20392969	20393560
WHB10961	MEC	Maxwell RSC Blood DNA Kit (AS1400)	NEBNext UltraII DNA library Prep Kit for Illumina	20396095	20393199	20368191	20392969	20393560
WHB10962	MEC	Maxwell RSC Blood DNA Kit (AS1400)	NEBNext UltraII DNA library Prep Kit for Illumina	20396095	20393199	20368191	20392969	20393560
WHB10963	MEC	Maxwell RSC Blood DNA Kit (AS1400)	NEBNext UltraII DNA library Prep Kit for Illumina	20396095	20393199	20368191	20392969	20393560
WHB10964	MEC	Maxwell RSC Blood DNA Kit (AS1400)	NEBNext UltraII DNA library Prep Kit for Illumina	20396095	20393199	20368191	20392969	20393560
WHB10965	MEC	Maxwell RSC Blood DNA Kit (AS1400)	NEBNext UltraII DNA library Prep Kit for Illumina	20392972	20393199	20368191	20392969	20393560
WHB10966	MEC	Maxwell RSC Blood DNA Kit (AS1400)	NEBNext UltraII DNA library Prep Kit for Illumina	20392972	20393199	20368191	20392969	20393560
WHB10967	MEC	Maxwell RSC Blood DNA Kit (AS1400)	NEBNext UltraII DNA library Prep Kit for Illumina	20392972	20393199	20368191	20392969	20393560
WHB10969	MEC	Maxwell RSC Blood DNA Kit (AS1400)	NEBNext UltraII DNA library Prep Kit for Illumina	20392972	20393199	20368191	20392969	20393560
WHB10970	MEC	Maxwell RSC Blood DNA Kit (AS1400)	NEBNext UltraII DNA library Prep Kit for Illumina	20392972	20393199	20368191	20392969	20393560
WHB10971	MEC	Maxwell RSC Blood DNA Kit (AS1400)	NEBNext UltraII DNA library Prep Kit for Illumina	20392972	20393199	20368191	20392969	20393560
WHB10973	MEC	Maxwell RSC Blood DNA Kit (AS1400)	NEBNext UltraII DNA library Prep Kit for Illumina	20392972	20393199	20368191	20392969	20393560
WHB10974	MEC	Maxwell RSC Blood DNA Kit (AS1400)	NEBNext UltraII DNA library Prep Kit for Illumina	20392972	20393199	20368191	20392969	20393560
WHB10975	MEC	Maxwell RSC Blood DNA Kit (AS1400)	NEBNext UltraII DNA library Prep Kit for Illumina	20392972	20393199	20368191	20392969	20393560
WHB10976	MEC	Maxwell RSC Blood DNA Kit (AS1400)	NEBNext UltraII DNA library Prep Kit for Illumina	20392972	20393199	20368191	20392969	20393560
WHB10977	MEC	Maxwell RSC Blood DNA Kit (AS1400)	NEBNext UltraII DNA library Prep Kit for Illumina	20392972	20393199	20368191	20392969	20393560
WHB10978	MEC	Maxwell RSC Blood DNA Kit (AS1400)	NEBNext UltraII DNA library Prep Kit for Illumina	20392972	20393199	20368191	20392969	20393560
WHB10979	MEC	Maxwell RSC Blood DNA Kit (AS1400)	NEBNext UltraII DNA library Prep Kit for Illumina	20392972	20393199	20368191	20392969	20393560
WHB10980	MEC	Maxwell RSC Blood DNA Kit (AS1400)	NEBNext UltraII DNA library Prep Kit for Illumina	20392972	20393199	20368191	20392969	20393560
WHB10981	MEC	Maxwell RSC Blood DNA Kit (AS1400)	NEBNext UltraII DNA library Prep Kit for Illumina	20392972	20393199	20368191	20392969	20393560
WHB10982	MEC	Maxwell RSC Blood DNA Kit (AS1400)	NEBNext UltraII DNA library Prep Kit for Illumina	20392972	20393199	20368191	20392969	20393560
WHB10983	MEC	Maxwell RSC Blood DNA Kit (AS1400)	NEBNext UltraII DNA library Prep Kit for Illumina	20392972	20393199	20368191	20392969	20393560
WHB10984	MEC	Maxwell RSC Blood DNA Kit (AS1400)	NEBNext UltraII DNA library Prep Kit for Illumina	20392972	20393199	20368191	20392969	20393560
WHB10985	MEC	Maxwell RSC Blood DNA Kit (AS1400)	NEBNext UltraII DNA library Prep Kit for Illumina	20392972	20393199	20368191	20392969	20393560
WHB10986	MEC	Maxwell RSC Blood DNA Kit (AS1400)	NEBNext UltraII DNA library Prep Kit for Illumina	20392972	20393199	20368191	20392969	20393560
WHB10987	MEC	Maxwell RSC Blood DNA Kit (AS1400)	NEBNext UltraII DNA library Prep Kit for Illumina	20396095	20393199	20368191	20392969	20393560
WHB10988	MEC	Maxwell RSC Blood DNA Kit (AS1400)	NEBNext UltraII DNA library Prep Kit for Illumina	20396095	20393199	20368191	20392969	20393560
WHB10989	MEC	Maxwell RSC Blood DNA Kit (AS1400)	NEBNext UltraII DNA library Prep Kit for Illumina	20396095	20393199	20368191	20392969	20393560
WHB10990	MEC	Maxwell RSC Blood DNA Kit (AS1400)	NEBNext UltraII DNA library Prep Kit for Illumina	20396095	20393199	20368191	20392969	20393560
WHB10992	MEC	Maxwell RSC Blood DNA Kit (AS1400)	NEBNext UltraII DNA library Prep Kit for Illumina	20396095	20393199	20368191	20392969	20393560
WHB10993	MEC	Maxwell RSC Blood DNA Kit (AS1400)	NEBNext UltraII DNA library Prep Kit for Illumina	20396095	20393199	20368191	20392969	20393560
WHB10994	MEC	Maxwell RSC Blood DNA Kit (AS1400)	NEBNext UltraII DNA library Prep Kit for Illumina	20396095	20393199	20368191	20392969	20393560
WHB10995	MEC	Maxwell RSC Blood DNA Kit (AS1400)	NEBNext UltraII DNA library Prep Kit for Illumina	20396095	20393199	20368191	20392969	20393560
WHB10996	MEC	Maxwell RSC Blood DNA Kit (AS1400)	NEBNext UltraII DNA library Prep Kit for Illumina	20396095	20393199	20368191	20392969	20393560
WHB10997	MEC	Maxwell RSC Blood DNA Kit (AS1400)	NEBNext UltraII DNA library Prep Kit for Illumina	20396095	20393199	20368191	20392969	20393560
WHB10999	MEC	Maxwell RSC Blood DNA Kit (AS1400)	NEBNext UltraII DNA library Prep Kit for Illumina	20396095	20393199	20368191	20392969	20393560
WHB11000	MEC	Maxwell RSC Blood DNA Kit (AS1400)	NEBNext UltraII DNA library Prep Kit for Illumina	20396095	20393199	20368191	20392969	20393560
WHB11001	MEC	Maxwell RSC Blood DNA Kit (AS1400)	NEBNext UltraII DNA library Prep Kit for Illumina	20396095	20393199	20368191	20392969	20393560
WHB11002	MEC	Maxwell RSC Blood DNA Kit (AS1400)	NEBNext UltraII DNA library Prep Kit for Illumina	20396095	20393199	20368191	20392969	20393560
WHB11004	MEC	Maxwell RSC Blood DNA Kit (AS1400)	NEBNext UltraII DNA library Prep Kit for Illumina	20396095	20393199	20368191	20392969	20393560
WHB11005	MEC	Maxwell RSC Blood DNA Kit (AS1400)	NEBNext UltraII DNA library Prep Kit for Illumina	20396095	20393199	20368191	20392969	20393560
WHB11006	MEC	Maxwell RSC Blood DNA Kit (AS1400)	NEBNext UltraII DNA library Prep Kit for Illumina	20396095	20393199	20368191	20392969	20393560
WHB11007	MEC	Maxwell RSC Blood DNA Kit (AS1400)	NEBNext UltraII DNA library Prep Kit for Illumina	20396095	20393199	20368191	20392969	20393560
WHB11009	MEC	Maxwell RSC Blood DNA Kit (AS1400)	NEBNext UltraII DNA library Prep Kit for Illumina	20396095	20393199	20368191	20392969	20393560
WHB11010	MEC	Maxwell RSC Blood DNA Kit (AS1400)	NEBNext UltraII DNA library Prep Kit for Illumina	20396095	20393199	20368191	20392969	20393560
WHB11011	MEC	Maxwell RSC Blood DNA Kit (AS1400)	NEBNext UltraII DNA library Prep Kit for Illumina	20396095	20393199	20368191	20392969	20393560
WHB11012	MEC	Maxwell RSC Blood DNA Kit (AS1400)	NEBNext UltraII DNA library Prep Kit for Illumina	20396095	20393199	20368191	20392969	20393560
WHB11013	MEC	Maxwell RSC Blood DNA Kit (AS1400)	NEBNext UltraII DNA library Prep Kit for Illumina	20396095	20393199	20368191	20392969	20393560
WHB11014	MEC	Maxwell RSC Blood DNA Kit (AS1400)	NEBNext UltraII DNA library Prep Kit for Illumina	20396095	20393199	20368191	20392969	20393560
WHB11015	MEC	Maxwell RSC Blood DNA Kit (AS1400)	NEBNext UltraII DNA library Prep Kit for Illumina	20396095	20393199	20368191	20392969	20393560
WHB11016	MEC	Maxwell RSC Blood DNA Kit (AS1400)	NEBNext UltraII DNA library Prep Kit for Illumina	20396095	20393199	20368191	20392969	20393560
WHB11017	MEC	Maxwell RSC Blood DNA Kit (AS1400)	NEBNext UltraII DNA library Prep Kit for Illumina	20396095	20393199	20368191	20392969	20393560
WHB11018	MEC	Maxwell RSC Blood DNA Kit (AS1400)	NEBNext UltraII DNA library Prep Kit for Illumina	20396095	20393199	20368191	20392969	20393560
WHB11019	MEC	Maxwell RSC Blood DNA Kit (AS1400)	NEBNext UltraII DNA library Prep Kit for Illumina	20396095	20393199	20368191	20392969	20393560
WHB11020	MEC	Maxwell RSC Blood DNA Kit (AS1400)	NEBNext UltraII DNA library Prep Kit for Illumina	20396095	20393199	20368191	20392969	20393560
WHB11022	MEC	Maxwell RSC Blood DNA Kit (AS1400)	NEBNext UltraII DNA library Prep Kit for Illumina	20396095	20393199	20368191	20392969	20393560
WHB11023	MEC	Maxwell RSC Blood DNA Kit (AS1400)	NEBNext UltraII DNA library Prep Kit for Illumina	20396095	20393199	20368191	20392969	20393560
WHB11025	MEC	Maxwell RSC Blood DNA Kit (AS1400)	NEBNext UltraII DNA library Prep Kit for Illumina	20396095	20393199	20368191	20392969	20393560
WHB11026	MEC	Maxwell RSC Blood DNA Kit (AS1400)	NEBNext UltraII DNA library Prep Kit for Illumina	20396095	20393199	20368191	20392969	20393560
WHB11027	MEC	Maxwell RSC Blood DNA Kit (AS1400)	NEBNext UltraII DNA library Prep Kit for Illumina	20396095	20393199	20368191	20392969	20393560
WHB11028	MEC	Maxwell RSC Blood DNA Kit (AS1400)	NEBNext UltraII DNA library Prep Kit for Illumina	20396095	20393199	20368191	20392969	20393560
WHB11029	MEC	Maxwell RSC Blood DNA Kit (AS1400)	NEBNext UltraII DNA library Prep Kit for Illumina	20396095	20393199	20368191	20392969	20393560
WHB11030	MEC	Maxwell RSC Blood DNA Kit (AS1400)	NEBNext UltraII DNA library Prep Kit for Illumina	20396095	20393199	20368191	20392969	20393560
WHB11031	MEC	Maxwell RSC Blood DNA Kit (AS1400)	NEBNext UltraII DNA library Prep Kit for Illumina	20396095	20393199	20368191	20392969	20393560
WHB11032	MEC	Maxwell RSC Blood DNA Kit (AS1400)	NEBNext UltraII DNA library Prep Kit for Illumina	20396095	20393199	20368191	20392969	20393560
WHB11033	MEC	Maxwell RSC Blood DNA Kit (AS1400)	NEBNext UltraII DNA library Prep Kit for Illumina	20396095	20393199	20368191	20392969	20393560
WHB11034	MEC	Maxwell RSC Blood DNA Kit (AS1400)	NEBNext UltraII DNA library Prep Kit for Illumina	20396095	20393199	20368191	20392969	20393560
WHB11035	MEC	Maxwell RSC Blood DNA Kit (AS1400)	NEBNext UltraII DNA library Prep Kit for Illumina	20396095	20393199	20368191	20392969	20393560
WHB11036	MEC	Maxwell RSC Blood DNA Kit (AS1400)	NEBNext UltraII DNA library Prep Kit for Illumina	20396095	20393199	20368191	20392969	20393560
WHB11037	MEC	Maxwell RSC Blood DNA Kit (AS1400)	NEBNext UltraII DNA library Prep Kit for Illumina	20396095	20393199	20368191	20392969	20393560
WHB11038	MEC	Maxwell RSC Blood DNA Kit (AS1400)	NEBNext UltraII DNA library Prep Kit for Illumina	20396095	20393199	20368191	20392969	20393560
WHB11039	MEC	Maxwell RSC Blood DNA Kit (AS1400)	NEBNext UltraII DNA library Prep Kit for Illumina	20396095	20393199	20368191	20392969	20393560
WHB11040	MEC	Maxwell RSC Blood DNA Kit (AS1400)	NEBNext UltraII DNA library Prep Kit for Illumina	20396095	20393199	20368191	20392969	20393560
WHB11042	MEC	Maxwell RSC Blood DNA Kit (AS1400)	NEBNext UltraII DNA library Prep Kit for Illumina	20396095	20393199	20368191	20392969	20393560
WHB11043	MEC	Maxwell RSC Blood DNA Kit (AS1400)	NEBNext UltraII DNA library Prep Kit for Illumina	20396095	20393199	20368191	20392969	20393560
WHB11044	MEC	Maxwell RSC Blood DNA Kit (AS1400)	NEBNext UltraII DNA library Prep Kit for Illumina	20396095	20393199	20368191	20392969	20393560
WHB11045	MEC	Maxwell RSC Blood DNA Kit (AS1400)	NEBNext UltraII DNA library Prep Kit for Illumina	20396095	20393199	20368191	20392969	20393560
WHB11046	MEC	Maxwell RSC Blood DNA Kit (AS1400)	NEBNext UltraII DNA library Prep Kit for Illumina	20396095	20393199	20368191	20392969	20393560
WHB11047	MEC	Maxwell RSC Blood DNA Kit (AS1400)	NEBNext UltraII DNA library Prep Kit for Illumina	20396095	20393199	20368191	20392969	20393560
WHB11048	MEC	Maxwell RSC Blood DNA Kit (AS1400)	NEBNext UltraII DNA library Prep Kit for Illumina	20396095	20393199	20368191	20392969	20393560
WHB11049	MEC	Maxwell RSC Blood DNA Kit (AS1400)	NEBNext UltraII DNA library Prep Kit for Illumina	20396095	20393199	20368191	20392969	20393560
WHB11050	MEC	Maxwell RSC Blood DNA Kit (AS1400)	NEBNext UltraII DNA library Prep Kit for Illumina	20396095	20393199	20368191	20392969	20393560
WHB11051	MEC	Maxwell RSC Blood DNA Kit (AS1400)	NEBNext UltraII DNA library Prep Kit for Illumina	20396095	20393199	20368191	20392969	20393560
WHB11052	MEC	Maxwell RSC Blood DNA Kit (AS1400)	NEBNext UltraII DNA library Prep Kit for Illumina	20396095	20393199	20368191	20392969	20393560
WHB11053	MEC	Maxwell RSC Blood DNA Kit (AS1400)	NEBNext UltraII DNA library Prep Kit for Illumina	20396095	20393199	20368191	20392969	20393560
WHB11054	MEC	Maxwell RSC Blood DNA Kit (AS1400)	NEBNext UltraII DNA library Prep Kit for Illumina	20396095	20393199	20368191	20392969	20393560
WHB11055	MEC	Maxwell RSC Blood DNA Kit (AS1400)	NEBNext UltraII DNA library Prep Kit for Illumina	20396095	20393199	20368191	20392969	20393560
WHB11056	MEC	Maxwell RSC Blood DNA Kit (AS1400)	NEBNext UltraII DNA library Prep Kit for Illumina	20396095	20393199	20368191	20392969	20393560
WHB11057	MEC	Maxwell RSC Blood DNA Kit (AS1400)	NEBNext UltraII DNA library Prep Kit for Illumina	20396095	20393199	20368191	20392969	20393560
WHB11058	MEC	Maxwell RSC Blood DNA Kit (AS1400)	NEBNext UltraII DNA library Prep Kit for Illumina	20396095	20393199	20368191	20392969	20393560
WHB11059	MEC	Maxwell RSC Blood DNA Kit (AS1400)	NEBNext UltraII DNA library Prep Kit for Illumina	20396095	20393199	20368191	20392969	20393560
WHB11061	MEC	Maxwell RSC Blood DNA Kit (AS1400)	NEBNext UltraII DNA library Prep Kit for Illumina	20396095	20393199	20368191	20392969	20393560
WHB11062	MEC	Maxwell RSC Blood DNA Kit (AS1400)	NEBNext UltraII DNA library Prep Kit for Illumina	20396095	20393199	20368191	20392969	20393560
WHB11063	MEC	Maxwell RSC Blood DNA Kit (AS1400)	NEBNext UltraII DNA library Prep Kit for Illumina	20396095	20393199	20368191	20392969	20393560
WHB11064	MEC	Maxwell RSC Blood DNA Kit (AS1400)	NEBNext UltraII DNA library Prep Kit for Illumina	20396095	20393199	20368191	20392969	20393560
WHB11067	MEC	Maxwell RSC Blood DNA Kit (AS1400)	NEBNext UltraII DNA library Prep Kit for Illumina	20396095	20393199	20368191	20392969	20393560
WHB11068	MEC	Maxwell RSC Blood DNA Kit (AS1400)	NEBNext UltraII DNA library Prep Kit for Illumina	20396095	20393199	20368191	20392969	20393560
WHB11069	MEC	Maxwell RSC Blood DNA Kit (AS1400)	NEBNext UltraII DNA library Prep Kit for Illumina	20392972	20393199	20368191	20392969	20394255
WHB11070	MEC	Maxwell RSC Blood DNA Kit (AS1400)	NEBNext UltraII DNA library Prep Kit for Illumina	20392972	20393199	20368191	20392969	20394255
WHB11071	MEC	Maxwell RSC Blood DNA Kit (AS1400)	NEBNext UltraII DNA library Prep Kit for Illumina	20392972	20393199	20368191	20392969	20394255
WHB11072	MEC	Maxwell RSC Blood DNA Kit (AS1400)	NEBNext UltraII DNA library Prep Kit for Illumina	20392972	20393199	20368191	20392969	20394255
WHB11074	MEC	Maxwell RSC Blood DNA Kit (AS1400)	NEBNext UltraII DNA library Prep Kit for Illumina	20392972	20393199	20368191	20392969	20394255
WHB11075	MEC	Maxwell RSC Blood DNA Kit (AS1400)	NEBNext UltraII DNA library Prep Kit for Illumina	20392972	20393199	20368191	20392969	20394255
WHB11076	MEC	Maxwell RSC Blood DNA Kit (AS1400)	NEBNext UltraII DNA library Prep Kit for Illumina	20392972	20393199	20368191	20392969	20394255
WHB11077	MEC	Maxwell RSC Blood DNA Kit (AS1400)	NEBNext UltraII DNA library Prep Kit for Illumina	20392972	20393199	20368191	20392969	20394255
WHB11078	MEC	QIAsymphony DSP DNA Mini Kit (192)	NEBNext UltraII DNA library Prep Kit for Illumina	20392972	20393199	20368191	20392969	20394255
WHB11079	MEC	QIAsymphony DSP DNA Mini Kit (192)	NEBNext UltraII DNA library Prep Kit for Illumina	20392972	20393199	20368191	20392969	20394255
WHB11080	MEC	QIAsymphony DSP DNA Mini Kit (192)	NEBNext UltraII DNA library Prep Kit for Illumina	20392972	20393199	20368191	20392969	20394255
WHB11081	MEC	Maxwell RSC Blood DNA Kit (AS1400)	NEBNext UltraII DNA library Prep Kit for Illumina	20392972	20393199	20368191	20392969	20394255
WHB11082	MEC	QIAsymphony DSP DNA Mini Kit (192)	NEBNext UltraII DNA library Prep Kit for Illumina	20392972	20393199	20368191	20392969	20394255
WHB11084	MEC	QIAsymphony DSP DNA Mini Kit (192)	NEBNext UltraII DNA library Prep Kit for Illumina	20392972	20393199	20368191	20392969	20394255
WHB11085	MEC	QIAsymphony DSP DNA Mini Kit (192)	NEBNext UltraII DNA library Prep Kit for Illumina	20392972	20393199	20368191	20392969	20394255
WHB11086	MEC	QIAsymphony DSP DNA Mini Kit (192)	NEBNext UltraII DNA library Prep Kit for Illumina	20392972	20393199	20368191	20392969	20394255
WHB11087	MEC	QIAsymphony DSP DNA Mini Kit (192)	NEBNext UltraII DNA library Prep Kit for Illumina	20392972	20393199	20368191	20392969	20394255
WHB11088	MEC	QIAsymphony DSP DNA Mini Kit (192)	NEBNext UltraII DNA library Prep Kit for Illumina	20392972	20393199	20368191	20392969	20394255
WHB11089	MEC	QIAsymphony DSP DNA Mini Kit (192)	NEBNext UltraII DNA library Prep Kit for Illumina	20396095	20393199	20377556	20398851	20394255
WHB11091	MEC	QIAsymphony DSP DNA Mini Kit (192)	NEBNext UltraII DNA library Prep Kit for Illumina	20396095	20393199	20377556	20398851	20394255
WHB11092	MEC	QIAsymphony DSP DNA Mini Kit (192)	NEBNext UltraII DNA library Prep Kit for Illumina	20396095	20393199	20377556	20398851	20394255
WHB11093	MEC	QIAsymphony DSP DNA Mini Kit (192)	NEBNext UltraII DNA library Prep Kit for Illumina	20396095	20393199	20377556	20398851	20394255
WHB11094	MEC	QIAsymphony DSP DNA Mini Kit (192)	NEBNext UltraII DNA library Prep Kit for Illumina	20396095	20393199	20377556	20398851	20394255
WHB11095	MEC	QIAsymphony DSP DNA Mini Kit (192)	NEBNext UltraII DNA library Prep Kit for Illumina	20396095	20393199	20377556	20398851	20394255
WHB11096	MEC	QIAsymphony DSP DNA Mini Kit (192)	NEBNext UltraII DNA library Prep Kit for Illumina	20396095	20393199	20377556	20398851	20394255
WHB11097	MEC	QIAsymphony DSP DNA Mini Kit (192)	NEBNext UltraII DNA library Prep Kit for Illumina	20396095	20393199	20377556	20398851	20394255
WHB11098	MEC	QIAsymphony DSP DNA Mini Kit (192)	NEBNext UltraII DNA library Prep Kit for Illumina	20396095	20393199	20377556	20398851	20394255
WHB11099	MEC	QIAsymphony DSP DNA Mini Kit (192)	NEBNext UltraII DNA library Prep Kit for Illumina	20396095	20393199	20377556	20398851	20394255
WHB11100	MEC	QIAsymphony DSP DNA Mini Kit (192)	NEBNext UltraII DNA library Prep Kit for Illumina	20396095	20393199	20377556	20398851	20394255
WHB11101	MEC	QIAsymphony DSP DNA Mini Kit (192)	NEBNext UltraII DNA library Prep Kit for Illumina	20396095	20393199	20377556	20398851	20394255
WHB11102	MEC	QIAsymphony DSP DNA Mini Kit (192)	NEBNext UltraII DNA library Prep Kit for Illumina	20396095	20393199	20377556	20398851	20394255
WHB11103	MEC	QIAsymphony DSP DNA Mini Kit (192)	NEBNext UltraII DNA library Prep Kit for Illumina	20396095	20393199	20377556	20398851	20394255
WHB11124	MEC	Maxwell RSC Blood DNA Kit (AS1400)	NEBNext UltraII DNA library Prep Kit for Illumina	20392970	20392975	20363660	20385639	20367085
WHB11125	MEC	Maxwell RSC Blood DNA Kit (AS1400)	NEBNext UltraII DNA library Prep Kit for Illumina	20392970	20392975	20363660	20385639	20367085
WHB11126	MEC	Maxwell RSC Blood DNA Kit (AS1400)	NEBNext UltraII DNA library Prep Kit for Illumina	20392970	20392975	20363660	20385639	20367085
WHB11127	MEC	Maxwell RSC Blood DNA Kit (AS1400)	NEBNext UltraII DNA library Prep Kit for Illumina	20392970	20392975	20363660	20385639	20367085
WHB11128	MEC	Maxwell RSC Blood DNA Kit (AS1400)	NEBNext UltraII DNA library Prep Kit for Illumina	20392970	20392975	20363660	20385639	20367085
WHB11129	MEC	Maxwell RSC Blood DNA Kit (AS1400)	NEBNext UltraII DNA library Prep Kit for Illumina	20392970	20392975	20363660	20385639	20367085
WHB11130	MEC	Maxwell RSC Blood DNA Kit (AS1400)	NEBNext UltraII DNA library Prep Kit for Illumina	20392970	20392975	20363660	20385639	20367085
WHB11131	MEC	Maxwell RSC Blood DNA Kit (AS1400)	NEBNext UltraII DNA library Prep Kit for Illumina	20392970	20392975	20363660	20385639	20367085
WHB11132	MEC	Maxwell RSC Blood DNA Kit (AS1400)	NEBNext UltraII DNA library Prep Kit for Illumina	20392970	20392975	20363660	20385639	20367085
WHB11133	MEC	Maxwell RSC Blood DNA Kit (AS1400)	NEBNext UltraII DNA library Prep Kit for Illumina	20392970	20392975	20363660	20385639	20367085
WHB11134	MEC	Maxwell RSC Blood DNA Kit (AS1400)	NEBNext UltraII DNA library Prep Kit for Illumina	20392970	20392975	20363660	20385639	20367085
WHB11135	MEC	Maxwell RSC Blood DNA Kit (AS1400)	NEBNext UltraII DNA library Prep Kit for Illumina	20392970	20392975	20363660	20385639	20367085
WHB11136	MEC	Maxwell RSC Blood DNA Kit (AS1400)	NEBNext UltraII DNA library Prep Kit for Illumina	20392970	20392975	20363660	20385639	20367085
WHB11137	MEC	Maxwell RSC Blood DNA Kit (AS1400)	NEBNext UltraII DNA library Prep Kit for Illumina	20392970	20392975	20363660	20385639	20367085
WHB11138	MEC	Maxwell RSC Blood DNA Kit (AS1400)	NEBNext UltraII DNA library Prep Kit for Illumina	20392970	20392975	20363660	20385639	20367085
WHB11139	MEC	QIAsymphony DSP DNA Mini Kit (192)	NEBNext UltraII DNA library Prep Kit for Illumina	20392970	20392975	20363660	20385639	20367085
WHB11140	MEC	QIAsymphony DSP DNA Mini Kit (192)	NEBNext UltraII DNA library Prep Kit for Illumina	20392970	20392975	20363660	20385639	20367085
WHB11141	MEC	QIAsymphony DSP DNA Mini Kit (192)	NEBNext UltraII DNA library Prep Kit for Illumina	20392970	20392975	20363660	20385639	20367085
WHB11142	MEC	QIAsymphony DSP DNA Mini Kit (192)	NEBNext UltraII DNA library Prep Kit for Illumina	20392970	20392975	20363660	20385639	20367085
WHB11143	MEC	QIAsymphony DSP DNA Mini Kit (192)	NEBNext UltraII DNA library Prep Kit for Illumina	20392970	20392975	20363660	20385639	20367085
WHB11144	MEC	QIAsymphony DSP DNA Mini Kit (192)	NEBNext UltraII DNA library Prep Kit for Illumina	20392970	20392975	20363660	20385639	20367085
WHB11145	MEC	QIAsymphony DSP DNA Mini Kit (192)	NEBNext UltraII DNA library Prep Kit for Illumina	20392970	20392975	20363660	20385639	20367085
WHB11146	MEC	QIAsymphony DSP DNA Mini Kit (192)	NEBNext UltraII DNA library Prep Kit for Illumina	20392970	20392975	20363660	20385639	20367085
WHB11147	MEC	QIAsymphony DSP DNA Mini Kit (192)	NEBNext UltraII DNA library Prep Kit for Illumina	20392970	20392975	20363660	20385639	20367085
WHB11148	MEC	QIAsymphony DSP DNA Mini Kit (192)	NEBNext UltraII DNA library Prep Kit for Illumina	20392970	20392975	20363660	20385639	20367085
WHB11149	MEC	QIAsymphony DSP DNA Mini Kit (192)	NEBNext UltraII DNA library Prep Kit for Illumina	20392970	20392975	20363660	20385639	20367085
WHB11150	MEC	QIAsymphony DSP DNA Mini Kit (192)	NEBNext UltraII DNA library Prep Kit for Illumina	20392970	20392975	20363660	20385639	20367085
WHB11151	MEC	QIAsymphony DSP DNA Mini Kit (192)	NEBNext UltraII DNA library Prep Kit for Illumina	20392970	20392975	20363660	20385639	20367085
WHB11152	MEC	QIAsymphony DSP DNA Mini Kit (192)	NEBNext UltraII DNA library Prep Kit for Illumina	20392970	20392975	20363660	20385639	20367085
WHB11153	MEC	QIAsymphony DSP DNA Mini Kit (192)	NEBNext UltraII DNA library Prep Kit for Illumina	20392970	20392975	20363660	20385639	20367085
WHB11154	MEC	QIAsymphony DSP DNA Mini Kit (192)	NEBNext UltraII DNA library Prep Kit for Illumina	20392970	20392975	20363660	20385639	20367085
WHB11155	MEC	QIAsymphony DSP DNA Mini Kit (192)	NEBNext UltraII DNA library Prep Kit for Illumina	20392970	20392975	20363660	20385639	20367085
WHB11156	MEC	QIAsymphony DSP DNA Mini Kit (192)	NEBNext UltraII DNA library Prep Kit for Illumina	20392970	20392975	20363660	20385639	20367085
WHB11158	MEC	QIAsymphony DSP DNA Mini Kit (192)	NEBNext UltraII DNA library Prep Kit for Illumina	20392970	20392975	20363660	20385639	20367085
WHB11159	MEC	Maxwell RSC Blood DNA Kit (AS1400)	NEBNext UltraII DNA library Prep Kit for Illumina	20392970	20392975	20363660	20385639	20367085
WHB11160	MEC	Maxwell RSC Blood DNA Kit (AS1400)	NEBNext UltraII DNA library Prep Kit for Illumina	20392970	20392975	20363660	20385639	20367085
WHB11161	MEC	Maxwell RSC Blood DNA Kit (AS1400)	NEBNext UltraII DNA library Prep Kit for Illumina	20392970	20392975	20363660	20385639	20367085
WHB11162	MEC	Maxwell RSC Blood DNA Kit (AS1400)	NEBNext UltraII DNA library Prep Kit for Illumina	20392970	20392975	20363660	20385639	20367085
WHB11163	MEC	Maxwell RSC Blood DNA Kit (AS1400)	NEBNext UltraII DNA library Prep Kit for Illumina	20392970	20392975	20363660	20385639	20367085
WHB11164	MEC	Maxwell RSC Blood DNA Kit (AS1400)	NEBNext UltraII DNA library Prep Kit for Illumina	20396095	20393199	20377556	20398851	20394255
WHB11165	MEC	Maxwell RSC Blood DNA Kit (AS1400)	NEBNext UltraII DNA library Prep Kit for Illumina	20396095	20393199	20377556	20398851	20394255
WHB11166	MEC	Maxwell RSC Blood DNA Kit (AS1400)	NEBNext UltraII DNA library Prep Kit for Illumina	20396095	20393199	20377556	20398851	20394255
WHB11168	MEC	Maxwell RSC Blood DNA Kit (AS1400)	NEBNext UltraII DNA library Prep Kit for Illumina	20396095	20393199	20377556	20398851	20394255
WHB11169	MEC	Maxwell RSC Blood DNA Kit (AS1400)	NEBNext UltraII DNA library Prep Kit for Illumina	20396095	20393199	20377556	20398851	20394255
WHB11170	MEC	Maxwell RSC Blood DNA Kit (AS1400)	NEBNext UltraII DNA library Prep Kit for Illumina	20396095	20397673	20377556	20392969	20394822
WHB11171	MEC	Maxwell RSC Blood DNA Kit (AS1400)	NEBNext UltraII DNA library Prep Kit for Illumina	20396095	20397673	20377556	20392969	20394822
WHB11172	MEC	Maxwell RSC Blood DNA Kit (AS1400)	NEBNext UltraII DNA library Prep Kit for Illumina	20396286	20399393	20377556	20400239	20394822
WHB11173	MEC	Maxwell RSC Blood DNA Kit (AS1400)	NEBNext UltraII DNA library Prep Kit for Illumina	20392972	20397673	20377556	20392969	20394822
WHB11174	MEC	Maxwell RSC Blood DNA Kit (AS1400)	NEBNext UltraII DNA library Prep Kit for Illumina	20396095	20397673	20377556	20392969	20394822
WHB11175	MEC	Maxwell RSC Blood DNA Kit (AS1400)	NEBNext UltraII DNA library Prep Kit for Illumina	20396286	20399393	20377556	20400239	20394822
WHB11176	MEC	Maxwell RSC Blood DNA Kit (AS1400)	NEBNext UltraII DNA library Prep Kit for Illumina	20396095	20397673	20377556	20392969	20394822
WHB11178	MEC	Maxwell RSC Blood DNA Kit (AS1400)	NEBNext UltraII DNA library Prep Kit for Illumina	20396286	20399393	20377556	20400239	20394822
WHB11179	MEC	Maxwell RSC Blood DNA Kit (AS1400)	NEBNext UltraII DNA library Prep Kit for Illumina	20396095	20397673	20377556	20392969	20394822
WHB11180	MEC	Maxwell RSC Blood DNA Kit (AS1400)	NEBNext UltraII DNA library Prep Kit for Illumina	20396095	20397673	20377556	20392969	20394822
WHB11181	MEC	Maxwell RSC Blood DNA Kit (AS1400)	NEBNext UltraII DNA library Prep Kit for Illumina	20396095	20397673	20377556	20392969	20394822
WHB11182	MEC	Maxwell RSC Blood DNA Kit (AS1400)	NEBNext UltraII DNA library Prep Kit for Illumina	20396095	20397673	20377556	20392969	20394822
WHB11183	MEC	Maxwell RSC Blood DNA Kit (AS1400)	NEBNext UltraII DNA library Prep Kit for Illumina	20396095	20397673	20377556	20392969	20394822
WHB11184	MEC	Maxwell RSC Blood DNA Kit (AS1400)	NEBNext UltraII DNA library Prep Kit for Illumina	20396095	20397673	20377556	20392969	20394822
WHB11185	MEC	Maxwell RSC Blood DNA Kit (AS1400)	NEBNext UltraII DNA library Prep Kit for Illumina	20396095	20397673	20377556	20392969	20394822
WHB11186	MEC	Maxwell RSC Blood DNA Kit (AS1400)	NEBNext UltraII DNA library Prep Kit for Illumina	20396095	20397673	20377556	20392969	20394822
WHB11189	MEC	Maxwell RSC Blood DNA Kit (AS1400)	NEBNext UltraII DNA library Prep Kit for Illumina	20396095	20397673	20377556	20392969	20394822
WHB11190	MEC	Maxwell RSC Blood DNA Kit (AS1400)	NEBNext UltraII DNA library Prep Kit for Illumina	20396095	20397673	20377556	20392969	20394822
WHB11191	MEC	Maxwell RSC Blood DNA Kit (AS1400)	NEBNext UltraII DNA library Prep Kit for Illumina	20392972	20397673	20377556	20392969	20394822
WHB11193	MEC	Maxwell RSC Blood DNA Kit (AS1400)	NEBNext UltraII DNA library Prep Kit for Illumina	20392972	20397673	20377556	20392969	20394822
WHB11194	MEC	Maxwell RSC Blood DNA Kit (AS1400)	NEBNext UltraII DNA library Prep Kit for Illumina	20392972	20397673	20377556	20392969	20394822
WHB11195	MEC	Maxwell RSC Blood DNA Kit (AS1400)	NEBNext UltraII DNA library Prep Kit for Illumina	20392972	20397673	20377556	20392969	20394822
WHB11196	MEC	Maxwell RSC Blood DNA Kit (AS1400)	NEBNext UltraII DNA library Prep Kit for Illumina	20392972	20397673	20377556	20392969	20394822
WHB11197	MEC	Maxwell RSC Blood DNA Kit (AS1400)	NEBNext UltraII DNA library Prep Kit for Illumina	20392972	20397673	20377556	20392969	20394822
WHB11199	MEC	Maxwell RSC Blood DNA Kit (AS1400)	NEBNext UltraII DNA library Prep Kit for Illumina	20392972	20397673	20377556	20392969	20394822
WHB11200	MEC	Maxwell RSC Blood DNA Kit (AS1400)	NEBNext UltraII DNA library Prep Kit for Illumina	20392972	20397673	20377556	20392969	20394822
WHB11206	MEC	Maxwell RSC Blood DNA Kit (AS1400)	NEBNext UltraII DNA library Prep Kit for Illumina	20392972	20397673	20377556	20392969	20394822
WHB11207	MEC	Maxwell RSC Blood DNA Kit (AS1400)	NEBNext UltraII DNA library Prep Kit for Illumina	20392972	20397673	20377556	20392969	20394822
WHB11208	MEC	Maxwell RSC Blood DNA Kit (AS1400)	NEBNext UltraII DNA library Prep Kit for Illumina	20392972	20397673	20377556	20392969	20394822
WHB11209	MEC	Maxwell RSC Blood DNA Kit (AS1400)	NEBNext UltraII DNA library Prep Kit for Illumina	20392972	20397673	20377556	20392969	20394822
WHB11210	MEC	Maxwell RSC Blood DNA Kit (AS1400)	NEBNext UltraII DNA library Prep Kit for Illumina	20392972	20397673	20377556	20392969	20394822
WHB11211	MEC	Maxwell RSC Blood DNA Kit (AS1400)	NEBNext UltraII DNA library Prep Kit for Illumina	20392972	20397673	20377556	20392969	20394822
WHB11212	MEC	Maxwell RSC Blood DNA Kit (AS1400)	NEBNext UltraII DNA library Prep Kit for Illumina	20392972	20397673	20377556	20392969	20394822
WHB11213	MEC	Maxwell RSC Blood DNA Kit (AS1400)	NEBNext UltraII DNA library Prep Kit for Illumina	20392972	20397673	20377556	20392969	20394822
WHB11214	MEC	Maxwell RSC Blood DNA Kit (AS1400)	NEBNext UltraII DNA library Prep Kit for Illumina	20392972	20397673	20377556	20392969	20394822
WHB11216	MEC	Maxwell RSC Blood DNA Kit (AS1400)	NEBNext UltraII DNA library Prep Kit for Illumina	20392972	20397673	20377556	20392969	20394822
WHB11217	MEC	Maxwell RSC Blood DNA Kit (AS1400)	NEBNext UltraII DNA library Prep Kit for Illumina	20392972	20397673	20377556	20392969	20394822
WHB11218	MEC	Maxwell RSC Blood DNA Kit (AS1400)	NEBNext UltraII DNA library Prep Kit for Illumina	20392972	20397673	20377556	20392969	20394822
WHB11219	MEC	Maxwell RSC Blood DNA Kit (AS1400)	NEBNext UltraII DNA library Prep Kit for Illumina	20392972	20397673	20377556	20392969	20394822
WHB11220	MEC	Maxwell RSC Blood DNA Kit (AS1400)	NEBNext UltraII DNA library Prep Kit for Illumina	20392972	20397673	20377556	20392969	20394822
WHB11221	MEC	Maxwell RSC Blood DNA Kit (AS1400)	NEBNext UltraII DNA library Prep Kit for Illumina	20392972	20397673	20377556	20392969	20394822
WHB11223	MEC	Maxwell RSC Blood DNA Kit (AS1400)	NEBNext UltraII DNA library Prep Kit for Illumina	20392972	20397673	20377556	20392969	20394822
WHB11224	MEC	Maxwell RSC Blood DNA Kit (AS1400)	NEBNext UltraII DNA library Prep Kit for Illumina	20392972	20397673	20377556	20392969	20394822
WHB11225	MEC	Maxwell RSC Blood DNA Kit (AS1400)	NEBNext UltraII DNA library Prep Kit for Illumina	20392972	20397673	20377556	20392969	20394822
WHB11226	MEC	Maxwell RSC Blood DNA Kit (AS1400)	NEBNext UltraII DNA library Prep Kit for Illumina	20392972	20397673	20377556	20392969	20394822
WHB11230	MEC	Maxwell RSC Blood DNA Kit (AS1400)	NEBNext UltraII DNA library Prep Kit for Illumina	20396286	20399393	20377556	20400239	20394822
WHB11234	MEC	Maxwell RSC Blood DNA Kit (AS1400)	NEBNext UltraII DNA library Prep Kit for Illumina	20396286	20399393	20377556	20400239	20394822
WHB11235	MEC	Maxwell RSC Blood DNA Kit (AS1400)	NEBNext UltraII DNA library Prep Kit for Illumina	20396286	20399393	20377556	20400239	20394822
WHB11236	MEC	Maxwell RSC Blood DNA Kit (AS1400)	NEBNext UltraII DNA library Prep Kit for Illumina	20396286	20399393	20377556	20400239	20394822
WHB11237	MEC	Maxwell RSC Blood DNA Kit (AS1400)	NEBNext UltraII DNA library Prep Kit for Illumina	20396286	20399393	20377556	20400239	20394822
WHB11238	MEC	Maxwell RSC Blood DNA Kit (AS1400)	NEBNext UltraII DNA library Prep Kit for Illumina	20396286	20399393	20377556	20400239	20394822
WHB11240	HELIOS	Unknown	NEBNext UltraII DNA library Prep Kit for Illumina	20396095	20397673	20377556	20392969	20394822
WHB11241	HELIOS	Unknown	NEBNext UltraII DNA library Prep Kit for Illumina	20396095	20397673	20377556	20392969	20394822
WHB11242	HELIOS	Unknown	NEBNext UltraII DNA library Prep Kit for Illumina	20396095	20397673	20377556	20392969	20394822
WHB3374	PRISM	Chemagic DNA Blood Kit (Perkin Elmer, MA)	NEBNext UltraII DNA library Prep Kit for Illumina	20305982	20298588	20285695	20300585	20285943
WHB3375	PRISM	Chemagic DNA Blood Kit (Perkin Elmer, MA)	NEBNext UltraII DNA library Prep Kit for Illumina	20305982	20298588	20285695	20300585	20285943
WHB3376	PRISM	Chemagic DNA Blood Kit (Perkin Elmer, MA)	NEBNext UltraII DNA library Prep Kit for Illumina	20305982	20298588	20285695	20300585	20285943
WHB3377	PRISM	Chemagic DNA Blood Kit (Perkin Elmer, MA)	NEBNext UltraII DNA library Prep Kit for Illumina	20305982	20298588	20285695	20300585	20285943
WHB3378	PRISM	Chemagic DNA Blood Kit (Perkin Elmer, MA)	NEBNext UltraII DNA library Prep Kit for Illumina	20305982	20298588	20285695	20300585	20285943
WHB3379	PRISM	Chemagic DNA Blood Kit (Perkin Elmer, MA)	NEBNext UltraII DNA library Prep Kit for Illumina	20305982	20298588	20285695	20300585	20285943
WHB3380	PRISM	Chemagic DNA Blood Kit (Perkin Elmer, MA)	NEBNext UltraII DNA library Prep Kit for Illumina	20305982	20298588	20285695	20300585	20285943
WHB3381	PRISM	Chemagic DNA Blood Kit (Perkin Elmer, MA)	NEBNext UltraII DNA library Prep Kit for Illumina	20305982	20298588	20285695	20300585	20285943
WHB3382	PRISM	Chemagic DNA Blood Kit (Perkin Elmer, MA)	NEBNext UltraII DNA library Prep Kit for Illumina	20305982	20298588	20285695	20300585	20285943
WHB3383	PRISM	Chemagic DNA Blood Kit (Perkin Elmer, MA)	NEBNext UltraII DNA library Prep Kit for Illumina	20305982	20298588	20285695	20300585	20285943
WHB3384	PRISM	Chemagic DNA Blood Kit (Perkin Elmer, MA)	NEBNext UltraII DNA library Prep Kit for Illumina	20305982	20298588	20285695	20300585	20285943
WHB3385	PRISM	Chemagic DNA Blood Kit (Perkin Elmer, MA)	NEBNext UltraII DNA library Prep Kit for Illumina	20305982	20298588	20285695	20300585	20285943
WHB3386	PRISM	Chemagic DNA Blood Kit (Perkin Elmer, MA)	NEBNext UltraII DNA library Prep Kit for Illumina	20305982	20298588	20285695	20300585	20285943
WHB3388	PRISM	Chemagic DNA Blood Kit (Perkin Elmer, MA)	NEBNext UltraII DNA library Prep Kit for Illumina	20305982	20298588	20285695	20300585	20285943
WHB3389	PRISM	Chemagic DNA Blood Kit (Perkin Elmer, MA)	NEBNext UltraII DNA library Prep Kit for Illumina	20305982	20298588	20285695	20300585	20285943
WHB3390	PRISM	Chemagic DNA Blood Kit (Perkin Elmer, MA)	NEBNext UltraII DNA library Prep Kit for Illumina	20305982	20298588	20285695	20300585	20285943
WHB3391	PRISM	Chemagic DNA Blood Kit (Perkin Elmer, MA)	NEBNext UltraII DNA library Prep Kit for Illumina	20305982	20298588	20285695	20300585	20285943
WHB3392	PRISM	Chemagic DNA Blood Kit (Perkin Elmer, MA)	NEBNext UltraII DNA library Prep Kit for Illumina	20305982	20298588	20285695	20300585	20285943
WHB3393	PRISM	Chemagic DNA Blood Kit (Perkin Elmer, MA)	NEBNext UltraII DNA library Prep Kit for Illumina	20305982	20298588	20285695	20300585	20285943
WHB3394	PRISM	Chemagic DNA Blood Kit (Perkin Elmer, MA)	NEBNext UltraII DNA library Prep Kit for Illumina	20305982	20298588	20285695	20300585	20285943
WHB3395	PRISM	Chemagic DNA Blood Kit (Perkin Elmer, MA)	NEBNext UltraII DNA library Prep Kit for Illumina	20305982	20298588	20285695	20300585	20285943
WHB3396	PRISM	Chemagic DNA Blood Kit (Perkin Elmer, MA)	NEBNext UltraII DNA library Prep Kit for Illumina	20305982	20298588	20285695	20300585	20285943
WHB3397	PRISM	Chemagic DNA Blood Kit (Perkin Elmer, MA)	NEBNext UltraII DNA library Prep Kit for Illumina	20305982	20298588	20285695	20300585	20285943
WHB3398	PRISM	Chemagic DNA Blood Kit (Perkin Elmer, MA)	NEBNext UltraII DNA library Prep Kit for Illumina	20305982	20298588	20285695	20300585	20285943
WHB3399	PRISM	Chemagic DNA Blood Kit (Perkin Elmer, MA)	NEBNext UltraII DNA library Prep Kit for Illumina	20305982	20298588	20285695	20300585	20285943
WHB3400	PRISM	Chemagic DNA Blood Kit (Perkin Elmer, MA)	NEBNext UltraII DNA library Prep Kit for Illumina	20305982	20298588	20285695	20300585	20285943
WHB3401	PRISM	Chemagic DNA Blood Kit (Perkin Elmer, MA)	NEBNext UltraII DNA library Prep Kit for Illumina	20305982	20298588	20285695	20300585	20285943
WHB3402	PRISM	Chemagic DNA Blood Kit (Perkin Elmer, MA)	NEBNext UltraII DNA library Prep Kit for Illumina	20305982	20298588	20285695	20300585	20285943
WHB3403	PRISM	Chemagic DNA Blood Kit (Perkin Elmer, MA)	NEBNext UltraII DNA library Prep Kit for Illumina	20305982	20298588	20285695	20300585	20285943
WHB3404	PRISM	Chemagic DNA Blood Kit (Perkin Elmer, MA)	NEBNext UltraII DNA library Prep Kit for Illumina	20305982	20298588	20285695	20295412	20285943
WHB3405	PRISM	Chemagic DNA Blood Kit (Perkin Elmer, MA)	NEBNext UltraII DNA library Prep Kit for Illumina	20305982	20298588	20285695	20295412	20285943
WHB3406	PRISM	Chemagic DNA Blood Kit (Perkin Elmer, MA)	NEBNext UltraII DNA library Prep Kit for Illumina	20305982	20298588	20285695	20295412	20285943
WHB3407	PRISM	Chemagic DNA Blood Kit (Perkin Elmer, MA)	NEBNext UltraII DNA library Prep Kit for Illumina	20305982	20298588	20285695	20295412	20285943
WHB3408	PRISM	Chemagic DNA Blood Kit (Perkin Elmer, MA)	NEBNext UltraII DNA library Prep Kit for Illumina	20305982	20298588	20285695	20295412	20285943
WHB3409	PRISM	Chemagic DNA Blood Kit (Perkin Elmer, MA)	NEBNext UltraII DNA library Prep Kit for Illumina	20305982	20298588	20285695	20295412	20285943
WHB3410	PRISM	Chemagic DNA Blood Kit (Perkin Elmer, MA)	NEBNext UltraII DNA library Prep Kit for Illumina	20305982	20298588	20285695	20295412	20285943
WHB3411	PRISM	Chemagic DNA Blood Kit (Perkin Elmer, MA)	NEBNext UltraII DNA library Prep Kit for Illumina	20305982	20298588	20285695	20295412	20285943
WHB3412	PRISM	Chemagic DNA Blood Kit (Perkin Elmer, MA)	NEBNext UltraII DNA library Prep Kit for Illumina	20305982	20298588	20285695	20295412	20285943
WHB3413	PRISM	Chemagic DNA Blood Kit (Perkin Elmer, MA)	NEBNext UltraII DNA library Prep Kit for Illumina	20305982	20298588	20285695	20295412	20285943
WHB3414	PRISM	Chemagic DNA Blood Kit (Perkin Elmer, MA)	NEBNext UltraII DNA library Prep Kit for Illumina	20305232	20305983	20285695	20307071	20285943
WHB3415	PRISM	Chemagic DNA Blood Kit (Perkin Elmer, MA)	NEBNext UltraII DNA library Prep Kit for Illumina	20305232	20305983	20285695	20307071	20285943
WHB3416	PRISM	Chemagic DNA Blood Kit (Perkin Elmer, MA)	NEBNext UltraII DNA library Prep Kit for Illumina	20305232	20305983	20285695	20307071	20285943
WHB3417	PRISM	Chemagic DNA Blood Kit (Perkin Elmer, MA)	NEBNext UltraII DNA library Prep Kit for Illumina	20305232	20305983	20285695	20307071	20285943
WHB3418	PRISM	Chemagic DNA Blood Kit (Perkin Elmer, MA)	NEBNext UltraII DNA library Prep Kit for Illumina	20305232	20305983	20285695	20307071	20285943
WHB3419	PRISM	Chemagic DNA Blood Kit (Perkin Elmer, MA)	NEBNext UltraII DNA library Prep Kit for Illumina	20305232	20305983	20285695	20307071	20285943
WHB3420	PRISM	Chemagic DNA Blood Kit (Perkin Elmer, MA)	NEBNext UltraII DNA library Prep Kit for Illumina	20305232	20305983	20285695	20307071	20285943
WHB3421	PRISM	Chemagic DNA Blood Kit (Perkin Elmer, MA)	NEBNext UltraII DNA library Prep Kit for Illumina	20305232	20305983	20285695	20307071	20285943
WHB3422	PRISM	Chemagic DNA Blood Kit (Perkin Elmer, MA)	NEBNext UltraII DNA library Prep Kit for Illumina	20305982	20298588	20290688	20308845	20285943
WHB3423	PRISM	Chemagic DNA Blood Kit (Perkin Elmer, MA)	NEBNext UltraII DNA library Prep Kit for Illumina	20305232	20305983	20285695	20307071	20285943
WHB3424	PRISM	Chemagic DNA Blood Kit (Perkin Elmer, MA)	NEBNext UltraII DNA library Prep Kit for Illumina	20305232	20305983	20285695	20307071	20285943
WHB3425	PRISM	Chemagic DNA Blood Kit (Perkin Elmer, MA)	NEBNext UltraII DNA library Prep Kit for Illumina	20305982	20298588	20265537	20300585	20285943
WHB3426	PRISM	Chemagic DNA Blood Kit (Perkin Elmer, MA)	NEBNext UltraII DNA library Prep Kit for Illumina	20305982	20298588	20265537	20300585	20285943
WHB3427	PRISM	Chemagic DNA Blood Kit (Perkin Elmer, MA)	NEBNext UltraII DNA library Prep Kit for Illumina	20305982	20298588	20265537	20300585	20285943
WHB3428	PRISM	Chemagic DNA Blood Kit (Perkin Elmer, MA)	NEBNext UltraII DNA library Prep Kit for Illumina	20305982	20298588	20265537	20300585	20285943
WHB3429	PRISM	Chemagic DNA Blood Kit (Perkin Elmer, MA)	NEBNext UltraII DNA library Prep Kit for Illumina	20305982	20298588	20265537	20300585	20285943
WHB3430	PRISM	Chemagic DNA Blood Kit (Perkin Elmer, MA)	NEBNext UltraII DNA library Prep Kit for Illumina	20305982	20298588	20265537	20300585	20285943
WHB3431	PRISM	Chemagic DNA Blood Kit (Perkin Elmer, MA)	NEBNext UltraII DNA library Prep Kit for Illumina	20305982	20298588	20265537	20300585	20285943
WHB3432	PRISM	Chemagic DNA Blood Kit (Perkin Elmer, MA)	NEBNext UltraII DNA library Prep Kit for Illumina	20305982	20298588	20265537	20300585	20285943
WHB3433	PRISM	Chemagic DNA Blood Kit (Perkin Elmer, MA)	NEBNext UltraII DNA library Prep Kit for Illumina	20305982	20298588	20265537	20300585	20285943
WHB3434	PRISM	Chemagic DNA Blood Kit (Perkin Elmer, MA)	NEBNext UltraII DNA library Prep Kit for Illumina	20305982	20298588	20265537	20300585	20285943
WHB3435	PRISM	Chemagic DNA Blood Kit (Perkin Elmer, MA)	NEBNext UltraII DNA library Prep Kit for Illumina	20305982	20298588	20285695	20305612	20285943
WHB3436	PRISM	Chemagic DNA Blood Kit (Perkin Elmer, MA)	NEBNext UltraII DNA library Prep Kit for Illumina	20305982	20298588	20285695	20305612	20285943
WHB3437	PRISM	Chemagic DNA Blood Kit (Perkin Elmer, MA)	NEBNext UltraII DNA library Prep Kit for Illumina	20305982	20298588	20285695	20305612	20285943
WHB3438	PRISM	Chemagic DNA Blood Kit (Perkin Elmer, MA)	NEBNext UltraII DNA library Prep Kit for Illumina	20305982	20298588	20285695	20305612	20285943
WHB3440	PRISM	Chemagic DNA Blood Kit (Perkin Elmer, MA)	NEBNext UltraII DNA library Prep Kit for Illumina	20305982	20298588	20285695	20305612	20285943
WHB3441	PRISM	Chemagic DNA Blood Kit (Perkin Elmer, MA)	NEBNext UltraII DNA library Prep Kit for Illumina	20305982	20298588	20285695	20305612	20285943
WHB3442	PRISM	Chemagic DNA Blood Kit (Perkin Elmer, MA)	NEBNext UltraII DNA library Prep Kit for Illumina	20305982	20298588	20285695	20305612	20285943
WHB3443	PRISM	Chemagic DNA Blood Kit (Perkin Elmer, MA)	NEBNext UltraII DNA library Prep Kit for Illumina	20305982	20298588	20285695	20305612	20285943
WHB3444	PRISM	Chemagic DNA Blood Kit (Perkin Elmer, MA)	NEBNext UltraII DNA library Prep Kit for Illumina	20305982	20298588	20285695	20305612	20285943
WHB3445	PRISM	Chemagic DNA Blood Kit (Perkin Elmer, MA)	NEBNext UltraII DNA library Prep Kit for Illumina	20305982	20298588	20285695	20300585	20285943
WHB3446	PRISM	Chemagic DNA Blood Kit (Perkin Elmer, MA)	NEBNext UltraII DNA library Prep Kit for Illumina	20305982	20298588	20285695	20300585	20285943
WHB3447	PRISM	Chemagic DNA Blood Kit (Perkin Elmer, MA)	NEBNext UltraII DNA library Prep Kit for Illumina	20305982	20298588	20285695	20300585	20285943
WHB3448	PRISM	Chemagic DNA Blood Kit (Perkin Elmer, MA)	NEBNext UltraII DNA library Prep Kit for Illumina	20305982	20298588	20285695	20300585	20285943
WHB3449	PRISM	Chemagic DNA Blood Kit (Perkin Elmer, MA)	NEBNext UltraII DNA library Prep Kit for Illumina	20305982	20298588	20285695	20300585	20285943
WHB3450	PRISM	Chemagic DNA Blood Kit (Perkin Elmer, MA)	NEBNext UltraII DNA library Prep Kit for Illumina	20305982	20298588	20285695	20300585	20285943
WHB3451	PRISM	Chemagic DNA Blood Kit (Perkin Elmer, MA)	NEBNext UltraII DNA library Prep Kit for Illumina	20305982	20298588	20285695	20300585	20285943
WHB3452	PRISM	Chemagic DNA Blood Kit (Perkin Elmer, MA)	NEBNext UltraII DNA library Prep Kit for Illumina	20305982	20298588	20285695	20300585	20285943
WHB3453	PRISM	Chemagic DNA Blood Kit (Perkin Elmer, MA)	NEBNext UltraII DNA library Prep Kit for Illumina	20305982	20298588	20285695	20300585	20285943
WHB3454	PRISM	Chemagic DNA Blood Kit (Perkin Elmer, MA)	NEBNext UltraII DNA library Prep Kit for Illumina	20305982	20298588	20285695	20300585	20285943
WHB3455	PRISM	Chemagic DNA Blood Kit (Perkin Elmer, MA)	NEBNext UltraII DNA library Prep Kit for Illumina	20305982	20298588	20286254	20300585	20294378
WHB3456	PRISM	Chemagic DNA Blood Kit (Perkin Elmer, MA)	NEBNext UltraII DNA library Prep Kit for Illumina	20305982	20298588	20286254	20300585	20294378
WHB3457	PRISM	Chemagic DNA Blood Kit (Perkin Elmer, MA)	NEBNext UltraII DNA library Prep Kit for Illumina	20305982	20298588	20286254	20300585	20294378
WHB3458	PRISM	Chemagic DNA Blood Kit (Perkin Elmer, MA)	NEBNext UltraII DNA library Prep Kit for Illumina	20305982	20298588	20286254	20300585	20294378
WHB3459	PRISM	Chemagic DNA Blood Kit (Perkin Elmer, MA)	NEBNext UltraII DNA library Prep Kit for Illumina	20305982	20298588	20286254	20300585	20294378
WHB3460	PRISM	Chemagic DNA Blood Kit (Perkin Elmer, MA)	NEBNext UltraII DNA library Prep Kit for Illumina	20305982	20298588	20286254	20300585	20294378
WHB3461	PRISM	Chemagic DNA Blood Kit (Perkin Elmer, MA)	NEBNext UltraII DNA library Prep Kit for Illumina	20305982	20298588	20286254	20300585	20294378
WHB3462	PRISM	Chemagic DNA Blood Kit (Perkin Elmer, MA)	NEBNext UltraII DNA library Prep Kit for Illumina	20305982	20298588	20286254	20300585	20294378
WHB3463	PRISM	Chemagic DNA Blood Kit (Perkin Elmer, MA)	NEBNext UltraII DNA library Prep Kit for Illumina	20305982	20298588	20286254	20300585	20294378
WHB3464	PRISM	Chemagic DNA Blood Kit (Perkin Elmer, MA)	NEBNext UltraII DNA library Prep Kit for Illumina	20305982	20298588	20286254	20300585	20294378
WHB3465	PRISM	Chemagic DNA Blood Kit (Perkin Elmer, MA)	NEBNext UltraII DNA library Prep Kit for Illumina	20305982	20298588	20285695	20300585	20285943
WHB3466	PRISM	Chemagic DNA Blood Kit (Perkin Elmer, MA)	NEBNext UltraII DNA library Prep Kit for Illumina	20305982	20298588	20285695	20300585	20285943
WHB3467	PRISM	Chemagic DNA Blood Kit (Perkin Elmer, MA)	NEBNext UltraII DNA library Prep Kit for Illumina	20305982	20298588	20285695	20300585	20285943
WHB3468	PRISM	Chemagic DNA Blood Kit (Perkin Elmer, MA)	NEBNext UltraII DNA library Prep Kit for Illumina	20305982	20298588	20285695	20300585	20285943
WHB3469	PRISM	Chemagic DNA Blood Kit (Perkin Elmer, MA)	NEBNext UltraII DNA library Prep Kit for Illumina	20305982	20298588	20285695	20300585	20285943
WHB3470	PRISM	Chemagic DNA Blood Kit (Perkin Elmer, MA)	NEBNext UltraII DNA library Prep Kit for Illumina	20305982	20298588	20285695	20300585	20285943
WHB3471	PRISM	Chemagic DNA Blood Kit (Perkin Elmer, MA)	NEBNext UltraII DNA library Prep Kit for Illumina	20305982	20298588	20285695	20300585	20285943
WHB3472	PRISM	Chemagic DNA Blood Kit (Perkin Elmer, MA)	NEBNext UltraII DNA library Prep Kit for Illumina	20305982	20298588	20290688	20308845	20285943
WHB3473	PRISM	Chemagic DNA Blood Kit (Perkin Elmer, MA)	NEBNext UltraII DNA library Prep Kit for Illumina	20305982	20298588	20285695	20300585	20285943
WHB3474	PRISM	Chemagic DNA Blood Kit (Perkin Elmer, MA)	NEBNext UltraII DNA library Prep Kit for Illumina	20305982	20298588	20290688	20308845	20285943
WHB3475	PRISM	Chemagic DNA Blood Kit (Perkin Elmer, MA)	NEBNext UltraII DNA library Prep Kit for Illumina	20305982	20298588	20285695	20300585	20285943
WHB3476	PRISM	Chemagic DNA Blood Kit (Perkin Elmer, MA)	NEBNext UltraII DNA library Prep Kit for Illumina	20305982	20298588	20285695	20300585	20285943
WHB3477	PRISM	Chemagic DNA Blood Kit (Perkin Elmer, MA)	NEBNext UltraII DNA library Prep Kit for Illumina	20305982	20298588	20290688	20308845	20285943
WHB3478	PRISM	Chemagic DNA Blood Kit (Perkin Elmer, MA)	NEBNext UltraII DNA library Prep Kit for Illumina	20293078	20298588	20285695	20300585	20285943
WHB3479	PRISM	Chemagic DNA Blood Kit (Perkin Elmer, MA)	NEBNext UltraII DNA library Prep Kit for Illumina	20305982	20298588	20290688	20308845	20285943
WHB3480	PRISM	Chemagic DNA Blood Kit (Perkin Elmer, MA)	NEBNext UltraII DNA library Prep Kit for Illumina	20305982	20298588	20290688	20308845	20285943
WHB3481	PRISM	Chemagic DNA Blood Kit (Perkin Elmer, MA)	NEBNext UltraII DNA library Prep Kit for Illumina	20305982	20298588	20290688	20308845	20285943
WHB3482	PRISM	Chemagic DNA Blood Kit (Perkin Elmer, MA)	NEBNext UltraII DNA library Prep Kit for Illumina	20293078	20298588	20285695	20300585	20285943
WHB3483	PRISM	Chemagic DNA Blood Kit (Perkin Elmer, MA)	NEBNext UltraII DNA library Prep Kit for Illumina	20305982	20298588	20290688	20308845	20285943
WHB3484	PRISM	Chemagic DNA Blood Kit (Perkin Elmer, MA)	NEBNext UltraII DNA library Prep Kit for Illumina	20293078	20298588	20285695	20300585	20285943
WHB3485	PRISM	Chemagic DNA Blood Kit (Perkin Elmer, MA)	NEBNext UltraII DNA library Prep Kit for Illumina	20293078	20298588	20285695	20300585	20285943
WHB3486	PRISM	Chemagic DNA Blood Kit (Perkin Elmer, MA)	NEBNext UltraII DNA library Prep Kit for Illumina	20293078	20298588	20285695	20300585	20285943
WHB3487	PRISM	Chemagic DNA Blood Kit (Perkin Elmer, MA)	NEBNext UltraII DNA library Prep Kit for Illumina	20293078	20298588	20285695	20300585	20285943
WHB3488	PRISM	Chemagic DNA Blood Kit (Perkin Elmer, MA)	NEBNext UltraII DNA library Prep Kit for Illumina	20293078	20298588	20285695	20300585	20285943
WHB3489	PRISM	Chemagic DNA Blood Kit (Perkin Elmer, MA)	NEBNext UltraII DNA library Prep Kit for Illumina	20305982	20298588	20290688	20308845	20285943
WHB3490	PRISM	Chemagic DNA Blood Kit (Perkin Elmer, MA)	NEBNext UltraII DNA library Prep Kit for Illumina	20293078	20298588	20285695	20300585	20285943
WHB3491	PRISM	Chemagic DNA Blood Kit (Perkin Elmer, MA)	NEBNext UltraII DNA library Prep Kit for Illumina	20293078	20298588	20285695	20300585	20285943
WHB3492	PRISM	Chemagic DNA Blood Kit (Perkin Elmer, MA)	NEBNext UltraII DNA library Prep Kit for Illumina	20293078	20298588	20285695	20300585	20285943
WHB3493	PRISM	Chemagic DNA Blood Kit (Perkin Elmer, MA)	NEBNext UltraII DNA library Prep Kit for Illumina	20293078	20298588	20285695	20300585	20285943
WHB3494	PRISM	Chemagic DNA Blood Kit (Perkin Elmer, MA)	NEBNext UltraII DNA library Prep Kit for Illumina	20293078	20298588	20285695	20300585	20285943
WHB3496	PRISM	Chemagic DNA Blood Kit (Perkin Elmer, MA)	NEBNext UltraII DNA library Prep Kit for Illumina	20293078	20298588	20285695	20300585	20285943
WHB3497	PRISM	Chemagic DNA Blood Kit (Perkin Elmer, MA)	NEBNext UltraII DNA library Prep Kit for Illumina	20293078	20298588	20285695	20300585	20285943
WHB3498	PRISM	Chemagic DNA Blood Kit (Perkin Elmer, MA)	NEBNext UltraII DNA library Prep Kit for Illumina	20293078	20298588	20285695	20300585	20285943
WHB3499	PRISM	Chemagic DNA Blood Kit (Perkin Elmer, MA)	NEBNext UltraII DNA library Prep Kit for Illumina	20293078	20298588	20285695	20300585	20285943
WHB3500	PRISM	Chemagic DNA Blood Kit (Perkin Elmer, MA)	NEBNext UltraII DNA library Prep Kit for Illumina	20293078	20298588	20285695	20300585	20285943
WHB3501	PRISM	Chemagic DNA Blood Kit (Perkin Elmer, MA)	NEBNext UltraII DNA library Prep Kit for Illumina	20293078	20298588	20285695	20300585	20285943
WHB3502	PRISM	Chemagic DNA Blood Kit (Perkin Elmer, MA)	NEBNext UltraII DNA library Prep Kit for Illumina	20293078	20298588	20285695	20300585	20285943
WHB3503	PRISM	Chemagic DNA Blood Kit (Perkin Elmer, MA)	NEBNext UltraII DNA library Prep Kit for Illumina	20235982	20298588	20285695	20300585	20285943
WHB3504	PRISM	Chemagic DNA Blood Kit (Perkin Elmer, MA)	NEBNext UltraII DNA library Prep Kit for Illumina	20235982	20298588	20285695	20300585	20285943
WHB3505	PRISM	Chemagic DNA Blood Kit (Perkin Elmer, MA)	NEBNext UltraII DNA library Prep Kit for Illumina	20235982	20298588	20285695	20300585	20285943
WHB3506	PRISM	Chemagic DNA Blood Kit (Perkin Elmer, MA)	NEBNext UltraII DNA library Prep Kit for Illumina	20235982	20298588	20285695	20300585	20285943
WHB3507	PRISM	Chemagic DNA Blood Kit (Perkin Elmer, MA)	NEBNext UltraII DNA library Prep Kit for Illumina	20235982	20298588	20285695	20300585	20285943
WHB3508	PRISM	Chemagic DNA Blood Kit (Perkin Elmer, MA)	NEBNext UltraII DNA library Prep Kit for Illumina	20235982	20298588	20285695	20300585	20285943
WHB3509	PRISM	Chemagic DNA Blood Kit (Perkin Elmer, MA)	NEBNext UltraII DNA library Prep Kit for Illumina	20235982	20298588	20285695	20300585	20285943
WHB3510	PRISM	Chemagic DNA Blood Kit (Perkin Elmer, MA)	NEBNext UltraII DNA library Prep Kit for Illumina	20235982	20298588	20285695	20300585	20285943
WHB3511	PRISM	Chemagic DNA Blood Kit (Perkin Elmer, MA)	NEBNext UltraII DNA library Prep Kit for Illumina	20235982	20298588	20285695	20300585	20285943
WHB3512	PRISM	Chemagic DNA Blood Kit (Perkin Elmer, MA)	NEBNext UltraII DNA library Prep Kit for Illumina	20235982	20298588	20285695	20300585	20285943
WHB3513	PRISM	Chemagic DNA Blood Kit (Perkin Elmer, MA)	NEBNext UltraII DNA library Prep Kit for Illumina	20235982	20298588	20285695	20300585	20285943
WHB3514	PRISM	Chemagic DNA Blood Kit (Perkin Elmer, MA)	NEBNext UltraII DNA library Prep Kit for Illumina	20235982	20298588	20285695	20300585	20285943
WHB3515	PRISM	Chemagic DNA Blood Kit (Perkin Elmer, MA)	NEBNext UltraII DNA library Prep Kit for Illumina	20235982	20298588	20285695	20300585	20285943
WHB3516	PRISM	Chemagic DNA Blood Kit (Perkin Elmer, MA)	NEBNext UltraII DNA library Prep Kit for Illumina	20235982	20298588	20285695	20300585	20285943
WHB3517	PRISM	Chemagic DNA Blood Kit (Perkin Elmer, MA)	NEBNext UltraII DNA library Prep Kit for Illumina	20235982	20298588	20285695	20300585	20285943
WHB3518	PRISM	Chemagic DNA Blood Kit (Perkin Elmer, MA)	NEBNext UltraII DNA library Prep Kit for Illumina	20235982	20298588	20285695	20300585	20285943
WHB3519	PRISM	Chemagic DNA Blood Kit (Perkin Elmer, MA)	NEBNext UltraII DNA library Prep Kit for Illumina	20235982	20298588	20285695	20300585	20285943
WHB3520	PRISM	Chemagic DNA Blood Kit (Perkin Elmer, MA)	NEBNext UltraII DNA library Prep Kit for Illumina	20235982	20298588	20285695	20300585	20285943
WHB3521	PRISM	Chemagic DNA Blood Kit (Perkin Elmer, MA)	NEBNext UltraII DNA library Prep Kit for Illumina	20235982	20298588	20285695	20300585	20285943
WHB3522	PRISM	Chemagic DNA Blood Kit (Perkin Elmer, MA)	NEBNext UltraII DNA library Prep Kit for Illumina	20235982	20298588	20285695	20300585	20285943
WHB3523	PRISM	Chemagic DNA Blood Kit (Perkin Elmer, MA)	NEBNext UltraII DNA library Prep Kit for Illumina	20305982	20298588	20285695	20300585	20285943
WHB3524	PRISM	Chemagic DNA Blood Kit (Perkin Elmer, MA)	NEBNext UltraII DNA library Prep Kit for Illumina	20305982	20298588	20285695	20300585	20285943
WHB3525	PRISM	Chemagic DNA Blood Kit (Perkin Elmer, MA)	NEBNext UltraII DNA library Prep Kit for Illumina	20305982	20298588	20285695	20300585	20285943
WHB3526	PRISM	Chemagic DNA Blood Kit (Perkin Elmer, MA)	NEBNext UltraII DNA library Prep Kit for Illumina	20305982	20298588	20285695	20300585	20285943
WHB3527	PRISM	Chemagic DNA Blood Kit (Perkin Elmer, MA)	NEBNext UltraII DNA library Prep Kit for Illumina	20305982	20298588	20285695	20300585	20285943
WHB3528	PRISM	Chemagic DNA Blood Kit (Perkin Elmer, MA)	NEBNext UltraII DNA library Prep Kit for Illumina	20305982	20298588	20285695	20300585	20285943
WHB3529	PRISM	Chemagic DNA Blood Kit (Perkin Elmer, MA)	NEBNext UltraII DNA library Prep Kit for Illumina	20305982	20298588	20285695	20300585	20285943
WHB3530	PRISM	Chemagic DNA Blood Kit (Perkin Elmer, MA)	NEBNext UltraII DNA library Prep Kit for Illumina	20305982	20298588	20285695	20300585	20285943
WHB3531	PRISM	Chemagic DNA Blood Kit (Perkin Elmer, MA)	NEBNext UltraII DNA library Prep Kit for Illumina	20305982	20298588	20285695	20300585	20285943
WHB3532	PRISM	Chemagic DNA Blood Kit (Perkin Elmer, MA)	NEBNext UltraII DNA library Prep Kit for Illumina	20305982	20298588	20285695	20300585	20285943
WHB3533	PRISM	Chemagic DNA Blood Kit (Perkin Elmer, MA)	NEBNext UltraII DNA library Prep Kit for Illumina	20305982	20298588	20285695	20300585	20285943
WHB3534	PRISM	Chemagic DNA Blood Kit (Perkin Elmer, MA)	NEBNext UltraII DNA library Prep Kit for Illumina	20305982	20298588	20285695	20300585	20285943
WHB3535	PRISM	Chemagic DNA Blood Kit (Perkin Elmer, MA)	NEBNext UltraII DNA library Prep Kit for Illumina	20305982	20298588	20285695	20300585	20285943
WHB3536	PRISM	Chemagic DNA Blood Kit (Perkin Elmer, MA)	NEBNext UltraII DNA library Prep Kit for Illumina	20305982	20298588	20285695	20300585	20285943
WHB3537	PRISM	Chemagic DNA Blood Kit (Perkin Elmer, MA)	NEBNext UltraII DNA library Prep Kit for Illumina	20305982	20298588	20290688	20308845	20285943
WHB3538	PRISM	Chemagic DNA Blood Kit (Perkin Elmer, MA)	NEBNext UltraII DNA library Prep Kit for Illumina	20305982	20298588	20285695	20300585	20285943
WHB3539	PRISM	Chemagic DNA Blood Kit (Perkin Elmer, MA)	NEBNext UltraII DNA library Prep Kit for Illumina	20305982	20298588	20285695	20300585	20285943
WHB3540	PRISM	Chemagic DNA Blood Kit (Perkin Elmer, MA)	NEBNext UltraII DNA library Prep Kit for Illumina	20305982	20298588	20285695	20300585	20285943
WHB3541	PRISM	Chemagic DNA Blood Kit (Perkin Elmer, MA)	NEBNext UltraII DNA library Prep Kit for Illumina	20305982	20298588	20285695	20300585	20285943
WHB3542	PRISM	Chemagic DNA Blood Kit (Perkin Elmer, MA)	NEBNext UltraII DNA library Prep Kit for Illumina	20305982	20298588	20285695	20300585	20285943
WHB3543	PRISM	Chemagic DNA Blood Kit (Perkin Elmer, MA)	NEBNext UltraII DNA library Prep Kit for Illumina	20305982	20298588	20285695	20300585	20285943
WHB3544	PRISM	Chemagic DNA Blood Kit (Perkin Elmer, MA)	NEBNext UltraII DNA library Prep Kit for Illumina	20305982	20298588	20285695	20300585	20285943
WHB3545	PRISM	Chemagic DNA Blood Kit (Perkin Elmer, MA)	NEBNext UltraII DNA library Prep Kit for Illumina	20305982	20298588	20285695	20300585	20285943
WHB3546	PRISM	Chemagic DNA Blood Kit (Perkin Elmer, MA)	NEBNext UltraII DNA library Prep Kit for Illumina	20305982	20298588	20285695	20300585	20285943
WHB3547	PRISM	Chemagic DNA Blood Kit (Perkin Elmer, MA)	NEBNext UltraII DNA library Prep Kit for Illumina	20305982	20298588	20285695	20300585	20285943
WHB3548	PRISM	Chemagic DNA Blood Kit (Perkin Elmer, MA)	NEBNext UltraII DNA library Prep Kit for Illumina	20305982	20298588	20285695	20300585	20285943
WHB3549	PRISM	Chemagic DNA Blood Kit (Perkin Elmer, MA)	NEBNext UltraII DNA library Prep Kit for Illumina	20305982	20298588	20285695	20300585	20285943
WHB3551	PRISM	Chemagic DNA Blood Kit (Perkin Elmer, MA)	NEBNext UltraII DNA library Prep Kit for Illumina	20305982	20298588	20285695	20300585	20285943
WHB3552	PRISM	Chemagic DNA Blood Kit (Perkin Elmer, MA)	NEBNext UltraII DNA library Prep Kit for Illumina	20305982	20298588	20285695	20300585	20285943
WHB3553	PRISM	Chemagic DNA Blood Kit (Perkin Elmer, MA)	NEBNext UltraII DNA library Prep Kit for Illumina	20305982	20298588	20285695	20300585	20285943
WHB3554	PRISM	Chemagic DNA Blood Kit (Perkin Elmer, MA)	NEBNext UltraII DNA library Prep Kit for Illumina	20305982	20277312	20285695	20300585	20285943
WHB3555	PRISM	Chemagic DNA Blood Kit (Perkin Elmer, MA)	NEBNext UltraII DNA library Prep Kit for Illumina	20305982	20277312	20285695	20300585	20285943
WHB3556	PRISM	Chemagic DNA Blood Kit (Perkin Elmer, MA)	NEBNext UltraII DNA library Prep Kit for Illumina	20305982	20277312	20285695	20300585	20285943
WHB3558	PRISM	Chemagic DNA Blood Kit (Perkin Elmer, MA)	NEBNext UltraII DNA library Prep Kit for Illumina	20305982	20277312	20285695	20300585	20285943
WHB3559	PRISM	Chemagic DNA Blood Kit (Perkin Elmer, MA)	NEBNext UltraII DNA library Prep Kit for Illumina	20305982	20277312	20285695	20300585	20285943
WHB3560	PRISM	Chemagic DNA Blood Kit (Perkin Elmer, MA)	NEBNext UltraII DNA library Prep Kit for Illumina	20305982	20277312	20285695	20300585	20285943
WHB3561	PRISM	Chemagic DNA Blood Kit (Perkin Elmer, MA)	NEBNext UltraII DNA library Prep Kit for Illumina	20305982	20277312	20285695	20300585	20285943
WHB3563	PRISM	Chemagic DNA Blood Kit (Perkin Elmer, MA)	NEBNext UltraII DNA library Prep Kit for Illumina	20305982	20277312	20285695	20300585	20285943
WHB3564	PRISM	Chemagic DNA Blood Kit (Perkin Elmer, MA)	NEBNext UltraII DNA library Prep Kit for Illumina	20304523	20314829	20291660	20305231	20294379
WHB3565	PRISM	Chemagic DNA Blood Kit (Perkin Elmer, MA)	NEBNext UltraII DNA library Prep Kit for Illumina	20304523	20314829	20291660	20305231	20294379
WHB3566	PRISM	Chemagic DNA Blood Kit (Perkin Elmer, MA)	NEBNext UltraII DNA library Prep Kit for Illumina	20304523	20314829	20291660	20305231	20294379
WHB3567	PRISM	Chemagic DNA Blood Kit (Perkin Elmer, MA)	NEBNext UltraII DNA library Prep Kit for Illumina	20304523	20314829	20291660	20305231	20294379
WHB3569	PRISM	Chemagic DNA Blood Kit (Perkin Elmer, MA)	NEBNext UltraII DNA library Prep Kit for Illumina	20304523	20314829	20291660	20305231	20294379
WHB3570	PRISM	Chemagic DNA Blood Kit (Perkin Elmer, MA)	NEBNext UltraII DNA library Prep Kit for Illumina	20304523	20314829	20291660	20305231	20294379
WHB3571	PRISM	Chemagic DNA Blood Kit (Perkin Elmer, MA)	NEBNext UltraII DNA library Prep Kit for Illumina	20304523	20314829	20291660	20305231	20294379
WHB3572	PRISM	Chemagic DNA Blood Kit (Perkin Elmer, MA)	NEBNext UltraII DNA library Prep Kit for Illumina	20304523	20314829	20291660	20305231	20294379
WHB3573	PRISM	Chemagic DNA Blood Kit (Perkin Elmer, MA)	NEBNext UltraII DNA library Prep Kit for Illumina	20304523	20314829	20291660	20305231	20294379
WHB3574	PRISM	Chemagic DNA Blood Kit (Perkin Elmer, MA)	NEBNext UltraII DNA library Prep Kit for Illumina	20304523	20314829	20291660	20305231	20294379
WHB3575	PRISM	Chemagic DNA Blood Kit (Perkin Elmer, MA)	NEBNext UltraII DNA library Prep Kit for Illumina	20304523	20314829	20291660	20305231	20294379
WHB3576	PRISM	Chemagic DNA Blood Kit (Perkin Elmer, MA)	NEBNext UltraII DNA library Prep Kit for Illumina	20304523	20314829	20291660	20305231	20294379
WHB3577	PRISM	Chemagic DNA Blood Kit (Perkin Elmer, MA)	NEBNext UltraII DNA library Prep Kit for Illumina	20304523	20314829	20291660	20305231	20294379
WHB3579	PRISM	Chemagic DNA Blood Kit (Perkin Elmer, MA)	NEBNext UltraII DNA library Prep Kit for Illumina	20304523	20314829	20291660	20305231	20294379
WHB3580	PRISM	Chemagic DNA Blood Kit (Perkin Elmer, MA)	NEBNext UltraII DNA library Prep Kit for Illumina	20304523	20314829	20291660	20305231	20294379
WHB3581	PRISM	Chemagic DNA Blood Kit (Perkin Elmer, MA)	NEBNext UltraII DNA library Prep Kit for Illumina	20304523	20314829	20291660	20305231	20294379
WHB3582	PRISM	Chemagic DNA Blood Kit (Perkin Elmer, MA)	NEBNext UltraII DNA library Prep Kit for Illumina	20304523	20314829	20291660	20305231	20294379
WHB3583	PRISM	Chemagic DNA Blood Kit (Perkin Elmer, MA)	NEBNext UltraII DNA library Prep Kit for Illumina	20304523	20314829	20291660	20305231	20294379
WHB3584	PRISM	Chemagic DNA Blood Kit (Perkin Elmer, MA)	NEBNext UltraII DNA library Prep Kit for Illumina	20304523	20314829	20291660	20305231	20294379
WHB3585	PRISM	Chemagic DNA Blood Kit (Perkin Elmer, MA)	NEBNext UltraII DNA library Prep Kit for Illumina	20304523	20314829	20291660	20305231	20294379
WHB3586	PRISM	Chemagic DNA Blood Kit (Perkin Elmer, MA)	NEBNext UltraII DNA library Prep Kit for Illumina	20304523	20314829	20291660	20305231	20294379
WHB3587	PRISM	Chemagic DNA Blood Kit (Perkin Elmer, MA)	NEBNext UltraII DNA library Prep Kit for Illumina	20304523	20314829	20291660	20305231	20294379
WHB3588	PRISM	Chemagic DNA Blood Kit (Perkin Elmer, MA)	NEBNext UltraII DNA library Prep Kit for Illumina	20304523	20314829	20291660	20305231	20294379
WHB3589	PRISM	Chemagic DNA Blood Kit (Perkin Elmer, MA)	NEBNext UltraII DNA library Prep Kit for Illumina	20304523	20314829	20291660	20305231	20294379
WHB3590	PRISM	Chemagic DNA Blood Kit (Perkin Elmer, MA)	NEBNext UltraII DNA library Prep Kit for Illumina	20304523	20314829	20291660	20305231	20294379
WHB3591	PRISM	Chemagic DNA Blood Kit (Perkin Elmer, MA)	NEBNext UltraII DNA library Prep Kit for Illumina	20304523	20314829	20291660	20305231	20294379
WHB3592	PRISM	Chemagic DNA Blood Kit (Perkin Elmer, MA)	NEBNext UltraII DNA library Prep Kit for Illumina	20304523	20314829	20291660	20305231	20294379
WHB3593	PRISM	Chemagic DNA Blood Kit (Perkin Elmer, MA)	NEBNext UltraII DNA library Prep Kit for Illumina	20304523	20314829	20291660	20305231	20294379
WHB3594	PRISM	Chemagic DNA Blood Kit (Perkin Elmer, MA)	NEBNext UltraII DNA library Prep Kit for Illumina	20304523	20314829	20291660	20305231	20294379
WHB3595	PRISM	Chemagic DNA Blood Kit (Perkin Elmer, MA)	NEBNext UltraII DNA library Prep Kit for Illumina	20304523	20314829	20291660	20305231	20294379
WHB3596	PRISM	Chemagic DNA Blood Kit (Perkin Elmer, MA)	NEBNext UltraII DNA library Prep Kit for Illumina	20304523	20314829	20291660	20305231	20294379
WHB3597	PRISM	Chemagic DNA Blood Kit (Perkin Elmer, MA)	NEBNext UltraII DNA library Prep Kit for Illumina	20304523	20314829	20291660	20305231	20294379
WHB3599	PRISM	Chemagic DNA Blood Kit (Perkin Elmer, MA)	NEBNext UltraII DNA library Prep Kit for Illumina	20304523	20314829	20291660	20305231	20294379
WHB3600	PRISM	Chemagic DNA Blood Kit (Perkin Elmer, MA)	NEBNext UltraII DNA library Prep Kit for Illumina	20304523	20314829	20291660	20305231	20294379
WHB3601	PRISM	Chemagic DNA Blood Kit (Perkin Elmer, MA)	NEBNext UltraII DNA library Prep Kit for Illumina	20304523	20314829	20291660	20305231	20294379
WHB3602	PRISM	Chemagic DNA Blood Kit (Perkin Elmer, MA)	NEBNext UltraII DNA library Prep Kit for Illumina	20304523	20314829	20291660	20305231	20294379
WHB3603	PRISM	Chemagic DNA Blood Kit (Perkin Elmer, MA)	NEBNext UltraII DNA library Prep Kit for Illumina	20304523	20314829	20291660	20305231	20294379
WHB3604	PRISM	Chemagic DNA Blood Kit (Perkin Elmer, MA)	NEBNext UltraII DNA library Prep Kit for Illumina	20304523	20314829	20291660	20305231	20294379
WHB3605	PRISM	Chemagic DNA Blood Kit (Perkin Elmer, MA)	NEBNext UltraII DNA library Prep Kit for Illumina	20304523	20314829	20291660	20305231	20294379
WHB3606	PRISM	Chemagic DNA Blood Kit (Perkin Elmer, MA)	NEBNext UltraII DNA library Prep Kit for Illumina	20304523	20314829	20291660	20305231	20294379
WHB3607	PRISM	Chemagic DNA Blood Kit (Perkin Elmer, MA)	NEBNext UltraII DNA library Prep Kit for Illumina	20304523	20314829	20291660	20305231	20294379
WHB3608	PRISM	Chemagic DNA Blood Kit (Perkin Elmer, MA)	NEBNext UltraII DNA library Prep Kit for Illumina	20304523	20314829	20291660	20305231	20294379
WHB3609	PRISM	Chemagic DNA Blood Kit (Perkin Elmer, MA)	NEBNext UltraII DNA library Prep Kit for Illumina	20304523	20314829	20291660	20305231	20294379
WHB3610	PRISM	Chemagic DNA Blood Kit (Perkin Elmer, MA)	NEBNext UltraII DNA library Prep Kit for Illumina	20304523	20314829	20291660	20305231	20294379
WHB3611	PRISM	Chemagic DNA Blood Kit (Perkin Elmer, MA)	NEBNext UltraII DNA library Prep Kit for Illumina	20304523	20314829	20291660	20305231	20294379
WHB3612	PRISM	Chemagic DNA Blood Kit (Perkin Elmer, MA)	NEBNext UltraII DNA library Prep Kit for Illumina	20304523	20314829	20291660	20305231	20294379
WHB3613	PRISM	Chemagic DNA Blood Kit (Perkin Elmer, MA)	NEBNext UltraII DNA library Prep Kit for Illumina	20304523	20314829	20291660	20305231	20294379
WHB3614	PRISM	Chemagic DNA Blood Kit (Perkin Elmer, MA)	NEBNext UltraII DNA library Prep Kit for Illumina	20304523	20314829	20291660	20305231	20294379
WHB3615	PRISM	Chemagic DNA Blood Kit (Perkin Elmer, MA)	NEBNext UltraII DNA library Prep Kit for Illumina	20304523	20314829	20291660	20305231	20294379
WHB3616	PRISM	Chemagic DNA Blood Kit (Perkin Elmer, MA)	NEBNext UltraII DNA library Prep Kit for Illumina	20304523	20314829	20291660	20305231	20294379
WHB3617	PRISM	Chemagic DNA Blood Kit (Perkin Elmer, MA)	NEBNext UltraII DNA library Prep Kit for Illumina	20304523	20314829	20291660	20305231	20294379
WHB3618	PRISM	Chemagic DNA Blood Kit (Perkin Elmer, MA)	NEBNext UltraII DNA library Prep Kit for Illumina	20304523	20314829	20291660	20305231	20294379
WHB3619	PRISM	Chemagic DNA Blood Kit (Perkin Elmer, MA)	NEBNext UltraII DNA library Prep Kit for Illumina	20304523	20314829	20291660	20305231	20294379
WHB3620	PRISM	Chemagic DNA Blood Kit (Perkin Elmer, MA)	NEBNext UltraII DNA library Prep Kit for Illumina	20304523	20314829	20291660	20305231	20294379
WHB3621	PRISM	Chemagic DNA Blood Kit (Perkin Elmer, MA)	NEBNext UltraII DNA library Prep Kit for Illumina	20304523	20314829	20291660	20305231	20294379
WHB3622	PRISM	Chemagic DNA Blood Kit (Perkin Elmer, MA)	NEBNext UltraII DNA library Prep Kit for Illumina	20304523	20314829	20291660	20305231	20294379
WHB3623	PRISM	Chemagic DNA Blood Kit (Perkin Elmer, MA)	NEBNext UltraII DNA library Prep Kit for Illumina	20304523	20314829	20291660	20305231	20294379
WHB3624	PRISM	Chemagic DNA Blood Kit (Perkin Elmer, MA)	NEBNext UltraII DNA library Prep Kit for Illumina	20304523	20314829	20291660	20305231	20294379
WHB3625	PRISM	Chemagic DNA Blood Kit (Perkin Elmer, MA)	NEBNext UltraII DNA library Prep Kit for Illumina	20304523	20314829	20291660	20305231	20294379
WHB3626	PRISM	Chemagic DNA Blood Kit (Perkin Elmer, MA)	NEBNext UltraII DNA library Prep Kit for Illumina	20304523	20314829	20291660	20305231	20294379
WHB3627	PRISM	Chemagic DNA Blood Kit (Perkin Elmer, MA)	NEBNext UltraII DNA library Prep Kit for Illumina	20304523	20314829	20291660	20305231	20294379
WHB3628	PRISM	Chemagic DNA Blood Kit (Perkin Elmer, MA)	NEBNext UltraII DNA library Prep Kit for Illumina	20304523	20314829	20291660	20305231	20294379
WHB3629	PRISM	Chemagic DNA Blood Kit (Perkin Elmer, MA)	NEBNext UltraII DNA library Prep Kit for Illumina	20304523	20314829	20291660	20305231	20294379
WHB3630	PRISM	Chemagic DNA Blood Kit (Perkin Elmer, MA)	NEBNext UltraII DNA library Prep Kit for Illumina	20304523	20314829	20291660	20305231	20294379
WHB3631	PRISM	Chemagic DNA Blood Kit (Perkin Elmer, MA)	NEBNext UltraII DNA library Prep Kit for Illumina	20304523	20314829	20291660	20305231	20294379
WHB3632	PRISM	Chemagic DNA Blood Kit (Perkin Elmer, MA)	NEBNext UltraII DNA library Prep Kit for Illumina	20304523	20314829	20291660	20305231	20294379
WHB3634	PRISM	Chemagic DNA Blood Kit (Perkin Elmer, MA)	NEBNext UltraII DNA library Prep Kit for Illumina	20314080	20314829	20291660	20305231	20294379
WHB3635	PRISM	Chemagic DNA Blood Kit (Perkin Elmer, MA)	NEBNext UltraII DNA library Prep Kit for Illumina	20314080	20314829	20291660	20305231	20294379
WHB3636	PRISM	Chemagic DNA Blood Kit (Perkin Elmer, MA)	NEBNext UltraII DNA library Prep Kit for Illumina	20314080	20314829	20291660	20305231	20294379
WHB3637	PRISM	Chemagic DNA Blood Kit (Perkin Elmer, MA)	NEBNext UltraII DNA library Prep Kit for Illumina	20314080	20314829	20291660	20305231	20294379
WHB3638	PRISM	Chemagic DNA Blood Kit (Perkin Elmer, MA)	NEBNext UltraII DNA library Prep Kit for Illumina	20314080	20314829	20291660	20305231	20294379
WHB3639	PRISM	Chemagic DNA Blood Kit (Perkin Elmer, MA)	NEBNext UltraII DNA library Prep Kit for Illumina	20314080	20314829	20291660	20305231	20294379
WHB3640	PRISM	Chemagic DNA Blood Kit (Perkin Elmer, MA)	NEBNext UltraII DNA library Prep Kit for Illumina	20314080	20314829	20291660	20305231	20294379
WHB3641	PRISM	Chemagic DNA Blood Kit (Perkin Elmer, MA)	NEBNext UltraII DNA library Prep Kit for Illumina	20314080	20314829	20291660	20305231	20294379
WHB3642	PRISM	Chemagic DNA Blood Kit (Perkin Elmer, MA)	NEBNext UltraII DNA library Prep Kit for Illumina	20314080	20314829	20291660	20305231	20294379
WHB3643	PRISM	Chemagic DNA Blood Kit (Perkin Elmer, MA)	NEBNext UltraII DNA library Prep Kit for Illumina	20314080	20314829	20291660	20305231	20294379
WHB3644	PRISM	Chemagic DNA Blood Kit (Perkin Elmer, MA)	NEBNext UltraII DNA library Prep Kit for Illumina	20314080	20314829	20291660	20305231	20294379
WHB3645	PRISM	Chemagic DNA Blood Kit (Perkin Elmer, MA)	NEBNext UltraII DNA library Prep Kit for Illumina	20314080	20314829	20291660	20305231	20294379
WHB3646	PRISM	Chemagic DNA Blood Kit (Perkin Elmer, MA)	NEBNext UltraII DNA library Prep Kit for Illumina	20314080	20314829	20291660	20305231	20294379
WHB3647	PRISM	Chemagic DNA Blood Kit (Perkin Elmer, MA)	NEBNext UltraII DNA library Prep Kit for Illumina	20314080	20314829	20291660	20305231	20294379
WHB3648	PRISM	Chemagic DNA Blood Kit (Perkin Elmer, MA)	NEBNext UltraII DNA library Prep Kit for Illumina	20314080	20314829	20291660	20305231	20294379
WHB3649	PRISM	Chemagic DNA Blood Kit (Perkin Elmer, MA)	NEBNext UltraII DNA library Prep Kit for Illumina	20314080	20314829	20291660	20305231	20294379
WHB3650	PRISM	Chemagic DNA Blood Kit (Perkin Elmer, MA)	NEBNext UltraII DNA library Prep Kit for Illumina	20314080	20314829	20291660	20305231	20294379
WHB3651	PRISM	Chemagic DNA Blood Kit (Perkin Elmer, MA)	NEBNext UltraII DNA library Prep Kit for Illumina	20314080	20314829	20291660	20305231	20294379
WHB3652	PRISM	Chemagic DNA Blood Kit (Perkin Elmer, MA)	NEBNext UltraII DNA library Prep Kit for Illumina	20314080	20314829	20291660	20305231	20294379
WHB3653	PRISM	Chemagic DNA Blood Kit (Perkin Elmer, MA)	NEBNext UltraII DNA library Prep Kit for Illumina	20314080	20314829	20291660	20305231	20294379
WHB3654	PRISM	Chemagic DNA Blood Kit (Perkin Elmer, MA)	NEBNext UltraII DNA library Prep Kit for Illumina	20304523	20314829	20291660	20308845	20294379
WHB3655	PRISM	Chemagic DNA Blood Kit (Perkin Elmer, MA)	NEBNext UltraII DNA library Prep Kit for Illumina	20304523	20314829	20291660	20308845	20294379
WHB3656	PRISM	Chemagic DNA Blood Kit (Perkin Elmer, MA)	NEBNext UltraII DNA library Prep Kit for Illumina	20304523	20314829	20291660	20308845	20294379
WHB3657	PRISM	Chemagic DNA Blood Kit (Perkin Elmer, MA)	NEBNext UltraII DNA library Prep Kit for Illumina	20304523	20314829	20291660	20308845	20294379
WHB3658	PRISM	Chemagic DNA Blood Kit (Perkin Elmer, MA)	NEBNext UltraII DNA library Prep Kit for Illumina	20304523	20314829	20291660	20308845	20294379
WHB3660	PRISM	Chemagic DNA Blood Kit (Perkin Elmer, MA)	NEBNext UltraII DNA library Prep Kit for Illumina	20304523	20314829	20291660	20308845	20294379
WHB3661	PRISM	Chemagic DNA Blood Kit (Perkin Elmer, MA)	NEBNext UltraII DNA library Prep Kit for Illumina	20304523	20314829	20291660	20308845	20294379
WHB3662	PRISM	Chemagic DNA Blood Kit (Perkin Elmer, MA)	NEBNext UltraII DNA library Prep Kit for Illumina	20304523	20314829	20291660	20308845	20294379
WHB3663	PRISM	Chemagic DNA Blood Kit (Perkin Elmer, MA)	NEBNext UltraII DNA library Prep Kit for Illumina	20304523	20314829	20291660	20308845	20294379
WHB3664	PRISM	Chemagic DNA Blood Kit (Perkin Elmer, MA)	NEBNext UltraII DNA library Prep Kit for Illumina	20304523	20314829	20291660	20305231	20294379
WHB3665	PRISM	Chemagic DNA Blood Kit (Perkin Elmer, MA)	NEBNext UltraII DNA library Prep Kit for Illumina	20304523	20314829	20291660	20305231	20294379
WHB3666	PRISM	Chemagic DNA Blood Kit (Perkin Elmer, MA)	NEBNext UltraII DNA library Prep Kit for Illumina	20304523	20314829	20291660	20305231	20294379
WHB3667	PRISM	Chemagic DNA Blood Kit (Perkin Elmer, MA)	NEBNext UltraII DNA library Prep Kit for Illumina	20304523	20314829	20291660	20305231	20294379
WHB3668	PRISM	Chemagic DNA Blood Kit (Perkin Elmer, MA)	NEBNext UltraII DNA library Prep Kit for Illumina	20304523	20314829	20291660	20305231	20294379
WHB3669	PRISM	Chemagic DNA Blood Kit (Perkin Elmer, MA)	NEBNext UltraII DNA library Prep Kit for Illumina	20304523	20314829	20291660	20305231	20294379
WHB3670	PRISM	Chemagic DNA Blood Kit (Perkin Elmer, MA)	NEBNext UltraII DNA library Prep Kit for Illumina	20304523	20314829	20291660	20305231	20294379
WHB3671	PRISM	Chemagic DNA Blood Kit (Perkin Elmer, MA)	NEBNext UltraII DNA library Prep Kit for Illumina	20304523	20314829	20291660	20305231	20294379
WHB3672	PRISM	Chemagic DNA Blood Kit (Perkin Elmer, MA)	NEBNext UltraII DNA library Prep Kit for Illumina	20304523	20314829	20291660	20305231	20294379
WHB3673	PRISM	Chemagic DNA Blood Kit (Perkin Elmer, MA)	NEBNext UltraII DNA library Prep Kit for Illumina	20304523	20314829	20291660	20305231	20294379
WHB3674	PRISM	Chemagic DNA Blood Kit (Perkin Elmer, MA)	NEBNext UltraII DNA library Prep Kit for Illumina	20304523	20314829	20291660	20305231	20294379
WHB3675	PRISM	Chemagic DNA Blood Kit (Perkin Elmer, MA)	NEBNext UltraII DNA library Prep Kit for Illumina	20304523	20314829	20291660	20305231	20294379
WHB3676	PRISM	Chemagic DNA Blood Kit (Perkin Elmer, MA)	NEBNext UltraII DNA library Prep Kit for Illumina	20304523	20314829	20291660	20305231	20294379
WHB3677	PRISM	Chemagic DNA Blood Kit (Perkin Elmer, MA)	NEBNext UltraII DNA library Prep Kit for Illumina	20304523	20314829	20291660	20305231	20294379
WHB3678	PRISM	Chemagic DNA Blood Kit (Perkin Elmer, MA)	NEBNext UltraII DNA library Prep Kit for Illumina	20304523	20314829	20291660	20305231	20294379
WHB3679	PRISM	Chemagic DNA Blood Kit (Perkin Elmer, MA)	NEBNext UltraII DNA library Prep Kit for Illumina	20304523	20314829	20291660	20305231	20294379
WHB3680	PRISM	Chemagic DNA Blood Kit (Perkin Elmer, MA)	NEBNext UltraII DNA library Prep Kit for Illumina	20304523	20314829	20291660	20305231	20294379
WHB3681	PRISM	Chemagic DNA Blood Kit (Perkin Elmer, MA)	NEBNext UltraII DNA library Prep Kit for Illumina	20304523	20314829	20291660	20305231	20294379
WHB3682	PRISM	Chemagic DNA Blood Kit (Perkin Elmer, MA)	NEBNext UltraII DNA library Prep Kit for Illumina	20304523	20314829	20291660	20305231	20294379
WHB3683	PRISM	Chemagic DNA Blood Kit (Perkin Elmer, MA)	NEBNext UltraII DNA library Prep Kit for Illumina	20304523	20314829	20291660	20305231	20294379
WHB3684	PRISM	Chemagic DNA Blood Kit (Perkin Elmer, MA)	NEBNext UltraII DNA library Prep Kit for Illumina	20304523	20314829	20291660	20305231	20294379
WHB3685	PRISM	Chemagic DNA Blood Kit (Perkin Elmer, MA)	NEBNext UltraII DNA library Prep Kit for Illumina	20304523	20314829	20291660	20305231	20294379
WHB3686	PRISM	Chemagic DNA Blood Kit (Perkin Elmer, MA)	NEBNext UltraII DNA library Prep Kit for Illumina	20304523	20314829	20291660	20305231	20294379
WHB3687	PRISM	Chemagic DNA Blood Kit (Perkin Elmer, MA)	NEBNext UltraII DNA library Prep Kit for Illumina	20304523	20314829	20291660	20305231	20294379
WHB3688	PRISM	Chemagic DNA Blood Kit (Perkin Elmer, MA)	NEBNext UltraII DNA library Prep Kit for Illumina	20304523	20314829	20291660	20305231	20294379
WHB3689	PRISM	Chemagic DNA Blood Kit (Perkin Elmer, MA)	NEBNext UltraII DNA library Prep Kit for Illumina	20314080	20314830	20315031	20311423	20294379
WHB3690	PRISM	Chemagic DNA Blood Kit (Perkin Elmer, MA)	NEBNext UltraII DNA library Prep Kit for Illumina	20304523	20314829	20291660	20305231	20294379
WHB3691	PRISM	Chemagic DNA Blood Kit (Perkin Elmer, MA)	NEBNext UltraII DNA library Prep Kit for Illumina	20304523	20314829	20291660	20305231	20294379
WHB3692	PRISM	Chemagic DNA Blood Kit (Perkin Elmer, MA)	NEBNext UltraII DNA library Prep Kit for Illumina	20304523	20314829	20291660	20305231	20294379
WHB3693	PRISM	Chemagic DNA Blood Kit (Perkin Elmer, MA)	NEBNext UltraII DNA library Prep Kit for Illumina	20304523	20314829	20291660	20305231	20294379
WHB3694	PRISM	Chemagic DNA Blood Kit (Perkin Elmer, MA)	NEBNext UltraII DNA library Prep Kit for Illumina	20304523	20314829	20291660	20305231	20294379
WHB3695	PRISM	Chemagic DNA Blood Kit (Perkin Elmer, MA)	NEBNext UltraII DNA library Prep Kit for Illumina	20304523	20314829	20291660	20308845	20294379
WHB3696	PRISM	Chemagic DNA Blood Kit (Perkin Elmer, MA)	NEBNext UltraII DNA library Prep Kit for Illumina	20304523	20314829	20291660	20308845	20294379
WHB3697	PRISM	Chemagic DNA Blood Kit (Perkin Elmer, MA)	NEBNext UltraII DNA library Prep Kit for Illumina	20304523	20314829	20291660	20308845	20294379
WHB3698	PRISM	Chemagic DNA Blood Kit (Perkin Elmer, MA)	NEBNext UltraII DNA library Prep Kit for Illumina	20304523	20314829	20291660	20308845	20294379
WHB3699	PRISM	Chemagic DNA Blood Kit (Perkin Elmer, MA)	NEBNext UltraII DNA library Prep Kit for Illumina	20304523	20314829	20291660	20308845	20294379
WHB3700	PRISM	Chemagic DNA Blood Kit (Perkin Elmer, MA)	NEBNext UltraII DNA library Prep Kit for Illumina	20304523	20314829	20291660	20308845	20294379
WHB3701	PRISM	Chemagic DNA Blood Kit (Perkin Elmer, MA)	NEBNext UltraII DNA library Prep Kit for Illumina	20304523	20314829	20291660	20308845	20294379
WHB3702	PRISM	Chemagic DNA Blood Kit (Perkin Elmer, MA)	NEBNext UltraII DNA library Prep Kit for Illumina	20304523	20314829	20291660	20308845	20294379
WHB3703	PRISM	Chemagic DNA Blood Kit (Perkin Elmer, MA)	NEBNext UltraII DNA library Prep Kit for Illumina	20304523	20314829	20291660	20308845	20294379
WHB3704	PRISM	Chemagic DNA Blood Kit (Perkin Elmer, MA)	NEBNext UltraII DNA library Prep Kit for Illumina	20304523	20314829	20291660	20308845	20294379
WHB3705	PRISM	Chemagic DNA Blood Kit (Perkin Elmer, MA)	NEBNext UltraII DNA library Prep Kit for Illumina	20304523	20314829	20291660	20308845	20294379
WHB3706	PRISM	Chemagic DNA Blood Kit (Perkin Elmer, MA)	NEBNext UltraII DNA library Prep Kit for Illumina	20304523	20314829	20291660	20308845	20294379
WHB3707	PRISM	Chemagic DNA Blood Kit (Perkin Elmer, MA)	NEBNext UltraII DNA library Prep Kit for Illumina	20304523	20314829	20291660	20308845	20294379
WHB3708	PRISM	Chemagic DNA Blood Kit (Perkin Elmer, MA)	NEBNext UltraII DNA library Prep Kit for Illumina	20304523	20314829	20291660	20308845	20294379
WHB3709	PRISM	Chemagic DNA Blood Kit (Perkin Elmer, MA)	NEBNext UltraII DNA library Prep Kit for Illumina	20304523	20314829	20291660	20308845	20294379
WHB3710	PRISM	Chemagic DNA Blood Kit (Perkin Elmer, MA)	NEBNext UltraII DNA library Prep Kit for Illumina	20304523	20314829	20291660	20308845	20294379
WHB3711	PRISM	Chemagic DNA Blood Kit (Perkin Elmer, MA)	NEBNext UltraII DNA library Prep Kit for Illumina	20304523	20314829	20291660	20308845	20294379
WHB3712	PRISM	Chemagic DNA Blood Kit (Perkin Elmer, MA)	NEBNext UltraII DNA library Prep Kit for Illumina	20304523	20314829	20291660	20308845	20294379
WHB3713	PRISM	Chemagic DNA Blood Kit (Perkin Elmer, MA)	NEBNext UltraII DNA library Prep Kit for Illumina	20304523	20314829	20291660	20308845	20294379
WHB3714	PRISM	Chemagic DNA Blood Kit (Perkin Elmer, MA)	NEBNext UltraII DNA library Prep Kit for Illumina	20304523	20314829	20291660	20308845	20294379
WHB3715	PRISM	Chemagic DNA Blood Kit (Perkin Elmer, MA)	NEBNext UltraII DNA library Prep Kit for Illumina	20314080	20314829	20291660	20305231	20294379
WHB3717	PRISM	Chemagic DNA Blood Kit (Perkin Elmer, MA)	NEBNext UltraII DNA library Prep Kit for Illumina	20314080	20314829	20291660	20305231	20294379
WHB3718	PRISM	Chemagic DNA Blood Kit (Perkin Elmer, MA)	NEBNext UltraII DNA library Prep Kit for Illumina	20314080	20314829	20291660	20305231	20294379
WHB3719	PRISM	Chemagic DNA Blood Kit (Perkin Elmer, MA)	NEBNext UltraII DNA library Prep Kit for Illumina	20314080	20314829	20291660	20305231	20294379
WHB3720	PRISM	Chemagic DNA Blood Kit (Perkin Elmer, MA)	NEBNext UltraII DNA library Prep Kit for Illumina	20314080	20314829	20291660	20305231	20294379
WHB3721	PRISM	Chemagic DNA Blood Kit (Perkin Elmer, MA)	NEBNext UltraII DNA library Prep Kit for Illumina	20314080	20314829	20291660	20305231	20294379
WHB3723	PRISM	Chemagic DNA Blood Kit (Perkin Elmer, MA)	NEBNext UltraII DNA library Prep Kit for Illumina	20314080	20314829	20291660	20305231	20294379
WHB3724	PRISM	Chemagic DNA Blood Kit (Perkin Elmer, MA)	NEBNext UltraII DNA library Prep Kit for Illumina	20314080	20314829	20291660	20305231	20294379
WHB3725	PRISM	Chemagic DNA Blood Kit (Perkin Elmer, MA)	NEBNext UltraII DNA library Prep Kit for Illumina	20314080	20314829	20291660	20308845	20294379
WHB3727	PRISM	Chemagic DNA Blood Kit (Perkin Elmer, MA)	NEBNext UltraII DNA library Prep Kit for Illumina	20314080	20314829	20291660	20308845	20294379
WHB3728	PRISM	Chemagic DNA Blood Kit (Perkin Elmer, MA)	NEBNext UltraII DNA library Prep Kit for Illumina	20314080	20314829	20291660	20308845	20294379
WHB3730	PRISM	Chemagic DNA Blood Kit (Perkin Elmer, MA)	NEBNext UltraII DNA library Prep Kit for Illumina	20314080	20314829	20291660	20308845	20294379
WHB3731	PRISM	Chemagic DNA Blood Kit (Perkin Elmer, MA)	NEBNext UltraII DNA library Prep Kit for Illumina	20314080	20314829	20291660	20308845	20294379
WHB3732	PRISM	Chemagic DNA Blood Kit (Perkin Elmer, MA)	NEBNext UltraII DNA library Prep Kit for Illumina	20314082	20314830	20303896	20300585	20302932
WHB3733	PRISM	Chemagic DNA Blood Kit (Perkin Elmer, MA)	NEBNext UltraII DNA library Prep Kit for Illumina	20314080	20314829	20291660	20308845	20294379
WHB3734	PRISM	Chemagic DNA Blood Kit (Perkin Elmer, MA)	NEBNext UltraII DNA library Prep Kit for Illumina	20314080	20314829	20291660	20308845	20294379
WHB3735	PRISM	Chemagic DNA Blood Kit (Perkin Elmer, MA)	NEBNext UltraII DNA library Prep Kit for Illumina	20314080	20314829	20291660	20308845	20294379
WHB3736	PRISM	Chemagic DNA Blood Kit (Perkin Elmer, MA)	NEBNext UltraII DNA library Prep Kit for Illumina	20314080	20314829	20291660	20308845	20294379
WHB3737	PRISM	Chemagic DNA Blood Kit (Perkin Elmer, MA)	NEBNext UltraII DNA library Prep Kit for Illumina	20314080	20314829	20291660	20308845	20294379
WHB3738	PRISM	Chemagic DNA Blood Kit (Perkin Elmer, MA)	NEBNext UltraII DNA library Prep Kit for Illumina	20314080	20314829	20291660	20308845	20294379
WHB3739	PRISM	Chemagic DNA Blood Kit (Perkin Elmer, MA)	NEBNext UltraII DNA library Prep Kit for Illumina	20314080	20314829	20291660	20308845	20294379
WHB3740	PRISM	Chemagic DNA Blood Kit (Perkin Elmer, MA)	NEBNext UltraII DNA library Prep Kit for Illumina	20314080	20314829	20291660	20308845	20294379
WHB3742	PRISM	Chemagic DNA Blood Kit (Perkin Elmer, MA)	NEBNext UltraII DNA library Prep Kit for Illumina	20314080	20314829	20291660	20308845	20294379
WHB3743	PRISM	Chemagic DNA Blood Kit (Perkin Elmer, MA)	NEBNext UltraII DNA library Prep Kit for Illumina	20314080	20314829	20291660	20308845	20294379
WHB3744	PRISM	Chemagic DNA Blood Kit (Perkin Elmer, MA)	NEBNext UltraII DNA library Prep Kit for Illumina	20314080	20314829	20291660	20308845	20294379
WHB3745	PRISM	Chemagic DNA Blood Kit (Perkin Elmer, MA)	NEBNext UltraII DNA library Prep Kit for Illumina	20314080	20314829	20291660	20308845	20294379
WHB3746	PRISM	Chemagic DNA Blood Kit (Perkin Elmer, MA)	NEBNext UltraII DNA library Prep Kit for Illumina	20314080	20314829	20291660	20305231	20294379
WHB3747	PRISM	Chemagic DNA Blood Kit (Perkin Elmer, MA)	NEBNext UltraII DNA library Prep Kit for Illumina	20314080	20314829	20291660	20305231	20294379
WHB3748	PRISM	Chemagic DNA Blood Kit (Perkin Elmer, MA)	NEBNext UltraII DNA library Prep Kit for Illumina	20314080	20314829	20291660	20305231	20294379
WHB3749	PRISM	Chemagic DNA Blood Kit (Perkin Elmer, MA)	NEBNext UltraII DNA library Prep Kit for Illumina	20314080	20314829	20291660	20305231	20294379
WHB3750	PRISM	Chemagic DNA Blood Kit (Perkin Elmer, MA)	NEBNext UltraII DNA library Prep Kit for Illumina	20314080	20314829	20291660	20305231	20294379
WHB3751	PRISM	Chemagic DNA Blood Kit (Perkin Elmer, MA)	NEBNext UltraII DNA library Prep Kit for Illumina	20314080	20314829	20291660	20305231	20294379
WHB3752	PRISM	Chemagic DNA Blood Kit (Perkin Elmer, MA)	NEBNext UltraII DNA library Prep Kit for Illumina	20314080	20314829	20291660	20305231	20294379
WHB3754	PRISM	Chemagic DNA Blood Kit (Perkin Elmer, MA)	NEBNext UltraII DNA library Prep Kit for Illumina	20314080	20314829	20291660	20305231	20294379
WHB3755	PRISM	Chemagic DNA Blood Kit (Perkin Elmer, MA)	NEBNext UltraII DNA library Prep Kit for Illumina	20314080	20314829	20291660	20305231	20294379
WHB3756	PRISM	Chemagic DNA Blood Kit (Perkin Elmer, MA)	NEBNext UltraII DNA library Prep Kit for Illumina	20314080	20314830	20291660	20311423	20294379
WHB3757	PRISM	Chemagic DNA Blood Kit (Perkin Elmer, MA)	NEBNext UltraII DNA library Prep Kit for Illumina	20314080	20314830	20291660	20311423	20294379
WHB3758	PRISM	Chemagic DNA Blood Kit (Perkin Elmer, MA)	NEBNext UltraII DNA library Prep Kit for Illumina	20314080	20314830	20291660	20311423	20294379
WHB3759	PRISM	Chemagic DNA Blood Kit (Perkin Elmer, MA)	NEBNext UltraII DNA library Prep Kit for Illumina	20314080	20314830	20291660	20311423	20294379
WHB3760	PRISM	Chemagic DNA Blood Kit (Perkin Elmer, MA)	NEBNext UltraII DNA library Prep Kit for Illumina	20314080	20314830	20291660	20311423	20294379
WHB3761	PRISM	Chemagic DNA Blood Kit (Perkin Elmer, MA)	NEBNext UltraII DNA library Prep Kit for Illumina	20314080	20314830	20291660	20311423	20294379
WHB3762	PRISM	Chemagic DNA Blood Kit (Perkin Elmer, MA)	NEBNext UltraII DNA library Prep Kit for Illumina	20314080	20314830	20291660	20311423	20294379
WHB3763	PRISM	Chemagic DNA Blood Kit (Perkin Elmer, MA)	NEBNext UltraII DNA library Prep Kit for Illumina	20314080	20314830	20291660	20311423	20294379
WHB3764	PRISM	Chemagic DNA Blood Kit (Perkin Elmer, MA)	NEBNext UltraII DNA library Prep Kit for Illumina	20314080	20314830	20291660	20311423	20294379
WHB3765	PRISM	Chemagic DNA Blood Kit (Perkin Elmer, MA)	NEBNext UltraII DNA library Prep Kit for Illumina	20314080	20314830	20291660	20311423	20294379
WHB3766	PRISM	Chemagic DNA Blood Kit (Perkin Elmer, MA)	NEBNext UltraII DNA library Prep Kit for Illumina	20314080	20314830	20291660	20311423	20294379
WHB3767	PRISM	Chemagic DNA Blood Kit (Perkin Elmer, MA)	NEBNext UltraII DNA library Prep Kit for Illumina	20314080	20314830	20291660	20311423	20294379
WHB3768	PRISM	Chemagic DNA Blood Kit (Perkin Elmer, MA)	NEBNext UltraII DNA library Prep Kit for Illumina	20314080	20314830	20291660	20311423	20294379
WHB3769	PRISM	Chemagic DNA Blood Kit (Perkin Elmer, MA)	NEBNext UltraII DNA library Prep Kit for Illumina	20314080	20314830	20291660	20311423	20294379
WHB3770	PRISM	Chemagic DNA Blood Kit (Perkin Elmer, MA)	NEBNext UltraII DNA library Prep Kit for Illumina	20314080	20314830	20291660	20311423	20294379
WHB3771	PRISM	Chemagic DNA Blood Kit (Perkin Elmer, MA)	NEBNext UltraII DNA library Prep Kit for Illumina	20314080	20314830	20291660	20311423	20294379
WHB3772	PRISM	Chemagic DNA Blood Kit (Perkin Elmer, MA)	NEBNext UltraII DNA library Prep Kit for Illumina	20314080	20314830	20291660	20311423	20294379
WHB3773	PRISM	Chemagic DNA Blood Kit (Perkin Elmer, MA)	NEBNext UltraII DNA library Prep Kit for Illumina	20314080	20314830	20291660	20311423	20294379
WHB3774	PRISM	Chemagic DNA Blood Kit (Perkin Elmer, MA)	NEBNext UltraII DNA library Prep Kit for Illumina	20314080	20314830	20291660	20311423	20294379
WHB3775	PRISM	Chemagic DNA Blood Kit (Perkin Elmer, MA)	NEBNext UltraII DNA library Prep Kit for Illumina	20314080	20314830	20291660	20311423	20294379
WHB3776	PRISM	Chemagic DNA Blood Kit (Perkin Elmer, MA)	NEBNext UltraII DNA library Prep Kit for Illumina	20314080	20314830	20291660	20311423	20294379
WHB3777	PRISM	Chemagic DNA Blood Kit (Perkin Elmer, MA)	NEBNext UltraII DNA library Prep Kit for Illumina	20314080	20314830	20291660	20311423	20294379
WHB3778	PRISM	Chemagic DNA Blood Kit (Perkin Elmer, MA)	NEBNext UltraII DNA library Prep Kit for Illumina	20314080	20314830	20291660	20311423	20294379
WHB3779	PRISM	Chemagic DNA Blood Kit (Perkin Elmer, MA)	NEBNext UltraII DNA library Prep Kit for Illumina	20314080	20314830	20291660	20311423	20294379
WHB3781	PRISM	Chemagic DNA Blood Kit (Perkin Elmer, MA)	NEBNext UltraII DNA library Prep Kit for Illumina	20314080	20314830	20291660	20311423	20294379
WHB3782	PRISM	Chemagic DNA Blood Kit (Perkin Elmer, MA)	NEBNext UltraII DNA library Prep Kit for Illumina	20314080	20314830	20291660	20311423	20294379
WHB3783	PRISM	Chemagic DNA Blood Kit (Perkin Elmer, MA)	NEBNext UltraII DNA library Prep Kit for Illumina	20314080	20314830	20291660	20311423	20294379
WHB3784	PRISM	Chemagic DNA Blood Kit (Perkin Elmer, MA)	NEBNext UltraII DNA library Prep Kit for Illumina	20314080	20314830	20291660	20311423	20294379
WHB3785	PRISM	Chemagic DNA Blood Kit (Perkin Elmer, MA)	NEBNext UltraII DNA library Prep Kit for Illumina	20314080	20314830	20291660	20311423	20294379
WHB3786	PRISM	Chemagic DNA Blood Kit (Perkin Elmer, MA)	NEBNext UltraII DNA library Prep Kit for Illumina	20314080	20314830	20291660	20311423	20294379
WHB3787	PRISM	Chemagic DNA Blood Kit (Perkin Elmer, MA)	NEBNext UltraII DNA library Prep Kit for Illumina	20314080	20314830	20291660	20311423	20294379
WHB3788	PRISM	Chemagic DNA Blood Kit (Perkin Elmer, MA)	NEBNext UltraII DNA library Prep Kit for Illumina	20314080	20314830	20291660	20311423	20294379
WHB3789	PRISM	Chemagic DNA Blood Kit (Perkin Elmer, MA)	NEBNext UltraII DNA library Prep Kit for Illumina	20314080	20314830	20291660	20311423	20294379
WHB3790	PRISM	Chemagic DNA Blood Kit (Perkin Elmer, MA)	NEBNext UltraII DNA library Prep Kit for Illumina	20314080	20314830	20291660	20311423	20294379
WHB3791	PRISM	Chemagic DNA Blood Kit (Perkin Elmer, MA)	NEBNext UltraII DNA library Prep Kit for Illumina	20314080	20314830	20291660	20311423	20294379
WHB3792	PRISM	Chemagic DNA Blood Kit (Perkin Elmer, MA)	NEBNext UltraII DNA library Prep Kit for Illumina	20314080	20314830	20291660	20311423	20294379
WHB3794	PRISM	Chemagic DNA Blood Kit (Perkin Elmer, MA)	NEBNext UltraII DNA library Prep Kit for Illumina	20314080	20314830	20291660	20311423	20294379
WHB3795	PRISM	Chemagic DNA Blood Kit (Perkin Elmer, MA)	NEBNext UltraII DNA library Prep Kit for Illumina	20314080	20314830	20291660	20311423	20294379
WHB3796	PRISM	Chemagic DNA Blood Kit (Perkin Elmer, MA)	NEBNext UltraII DNA library Prep Kit for Illumina	20314080	20314830	20303896	20311423	20294379
WHB3797	PRISM	Chemagic DNA Blood Kit (Perkin Elmer, MA)	NEBNext UltraII DNA library Prep Kit for Illumina	20314080	20314830	20303896	20311423	20294379
WHB3798	PRISM	Chemagic DNA Blood Kit (Perkin Elmer, MA)	NEBNext UltraII DNA library Prep Kit for Illumina	20314080	20314830	20303896	20311423	20294379
WHB3799	PRISM	Chemagic DNA Blood Kit (Perkin Elmer, MA)	NEBNext UltraII DNA library Prep Kit for Illumina	20314080	20314830	20303896	20311423	20294379
WHB3800	PRISM	Chemagic DNA Blood Kit (Perkin Elmer, MA)	NEBNext UltraII DNA library Prep Kit for Illumina	20314080	20314830	20303896	20311423	20294379
WHB3801	PRISM	Chemagic DNA Blood Kit (Perkin Elmer, MA)	NEBNext UltraII DNA library Prep Kit for Illumina	20314080	20314830	20303896	20311423	20294379
WHB3802	PRISM	Chemagic DNA Blood Kit (Perkin Elmer, MA)	NEBNext UltraII DNA library Prep Kit for Illumina	20314080	20314830	20303896	20311423	20294379
WHB3803	PRISM	Chemagic DNA Blood Kit (Perkin Elmer, MA)	NEBNext UltraII DNA library Prep Kit for Illumina	20314080	20314830	20303896	20311423	20294379
WHB3804	PRISM	Chemagic DNA Blood Kit (Perkin Elmer, MA)	NEBNext UltraII DNA library Prep Kit for Illumina	20314080	20314830	20303896	20311423	20294379
WHB3806	PRISM	Chemagic DNA Blood Kit (Perkin Elmer, MA)	NEBNext UltraII DNA library Prep Kit for Illumina	20314080	20314830	20291660	20311423	20294379
WHB3807	PRISM	Chemagic DNA Blood Kit (Perkin Elmer, MA)	NEBNext UltraII DNA library Prep Kit for Illumina	20314080	20314830	20291660	20311423	20294379
WHB3808	PRISM	Chemagic DNA Blood Kit (Perkin Elmer, MA)	NEBNext UltraII DNA library Prep Kit for Illumina	20314080	20314830	20291660	20311423	20294379
WHB3810	PRISM	Chemagic DNA Blood Kit (Perkin Elmer, MA)	NEBNext UltraII DNA library Prep Kit for Illumina	20314080	20314830	20291660	20311423	20294379
WHB3811	PRISM	Chemagic DNA Blood Kit (Perkin Elmer, MA)	NEBNext UltraII DNA library Prep Kit for Illumina	20314080	20314830	20291660	20311423	20294379
WHB3812	PRISM	Chemagic DNA Blood Kit (Perkin Elmer, MA)	NEBNext UltraII DNA library Prep Kit for Illumina	20314080	20314830	20291660	20311423	20294379
WHB3813	PRISM	Chemagic DNA Blood Kit (Perkin Elmer, MA)	NEBNext UltraII DNA library Prep Kit for Illumina	20314080	20314830	20291660	20311423	20294379
WHB3814	PRISM	Chemagic DNA Blood Kit (Perkin Elmer, MA)	NEBNext UltraII DNA library Prep Kit for Illumina	20314080	20314830	20291660	20311423	20294379
WHB3815	PRISM	Chemagic DNA Blood Kit (Perkin Elmer, MA)	NEBNext UltraII DNA library Prep Kit for Illumina	20314080	20314830	20291660	20311423	20294379
WHB3816	PRISM	Chemagic DNA Blood Kit (Perkin Elmer, MA)	NEBNext UltraII DNA library Prep Kit for Illumina	20304523	20314830	20303896	20311423	20294379
WHB3817	PRISM	Chemagic DNA Blood Kit (Perkin Elmer, MA)	NEBNext UltraII DNA library Prep Kit for Illumina	20304523	20314830	20303896	20311423	20294379
WHB3818	PRISM	Chemagic DNA Blood Kit (Perkin Elmer, MA)	NEBNext UltraII DNA library Prep Kit for Illumina	20304523	20314830	20303896	20311423	20294379
WHB3819	PRISM	Chemagic DNA Blood Kit (Perkin Elmer, MA)	NEBNext UltraII DNA library Prep Kit for Illumina	20304523	20314830	20303896	20311423	20294379
WHB3820	PRISM	Chemagic DNA Blood Kit (Perkin Elmer, MA)	NEBNext UltraII DNA library Prep Kit for Illumina	20304523	20314830	20303896	20311423	20294379
WHB3821	PRISM	Chemagic DNA Blood Kit (Perkin Elmer, MA)	NEBNext UltraII DNA library Prep Kit for Illumina	20304523	20314830	20303896	20311423	20294379
WHB3822	PRISM	Chemagic DNA Blood Kit (Perkin Elmer, MA)	NEBNext UltraII DNA library Prep Kit for Illumina	20304523	20314830	20303896	20311423	20294379
WHB3823	PRISM	Chemagic DNA Blood Kit (Perkin Elmer, MA)	NEBNext UltraII DNA library Prep Kit for Illumina	20304523	20314830	20303896	20311423	20294379
WHB3824	PRISM	Chemagic DNA Blood Kit (Perkin Elmer, MA)	NEBNext UltraII DNA library Prep Kit for Illumina	20304523	20314830	20303896	20311423	20294379
WHB3825	PRISM	Chemagic DNA Blood Kit (Perkin Elmer, MA)	NEBNext UltraII DNA library Prep Kit for Illumina	20314082	20314830	20303896	20300585	20302932
WHB3826	PRISM	Chemagic DNA Blood Kit (Perkin Elmer, MA)	NEBNext UltraII DNA library Prep Kit for Illumina	20304523	20314830	20303896	20311423	20294379
WHB3827	PRISM	Chemagic DNA Blood Kit (Perkin Elmer, MA)	NEBNext UltraII DNA library Prep Kit for Illumina	20314080	20314830	20303896	20311423	20294379
WHB3828	PRISM	Chemagic DNA Blood Kit (Perkin Elmer, MA)	NEBNext UltraII DNA library Prep Kit for Illumina	20314080	20314830	20303896	20311423	20294379
WHB3829	PRISM	Chemagic DNA Blood Kit (Perkin Elmer, MA)	NEBNext UltraII DNA library Prep Kit for Illumina	20314080	20314830	20303896	20311423	20294379
WHB3830	PRISM	Chemagic DNA Blood Kit (Perkin Elmer, MA)	NEBNext UltraII DNA library Prep Kit for Illumina	20314080	20314830	20303896	20311423	20294379
WHB3831	PRISM	Chemagic DNA Blood Kit (Perkin Elmer, MA)	NEBNext UltraII DNA library Prep Kit for Illumina	20314080	20314830	20303896	20311423	20294379
WHB3832	PRISM	Chemagic DNA Blood Kit (Perkin Elmer, MA)	NEBNext UltraII DNA library Prep Kit for Illumina	20314080	20314830	20303896	20311423	20294379
WHB3833	PRISM	Chemagic DNA Blood Kit (Perkin Elmer, MA)	NEBNext UltraII DNA library Prep Kit for Illumina	20314080	20314830	20303896	20311423	20294379
WHB3834	PRISM	Chemagic DNA Blood Kit (Perkin Elmer, MA)	NEBNext UltraII DNA library Prep Kit for Illumina	20314080	20314830	20303896	20311423	20294379
WHB3835	PRISM	Chemagic DNA Blood Kit (Perkin Elmer, MA)	NEBNext UltraII DNA library Prep Kit for Illumina	20314080	20314830	20303896	20311423	20294379
WHB3836	PRISM	Chemagic DNA Blood Kit (Perkin Elmer, MA)	NEBNext UltraII DNA library Prep Kit for Illumina	20314080	20314830	20303896	20311423	20294379
WHB3837	PRISM	Chemagic DNA Blood Kit (Perkin Elmer, MA)	NEBNext UltraII DNA library Prep Kit for Illumina	20314080	20314830	20315031	20311423	20294379
WHB3838	PRISM	Chemagic DNA Blood Kit (Perkin Elmer, MA)	NEBNext UltraII DNA library Prep Kit for Illumina	20314080	20314830	20315031	20311423	20294379
WHB3839	PRISM	Chemagic DNA Blood Kit (Perkin Elmer, MA)	NEBNext UltraII DNA library Prep Kit for Illumina	20314080	20314830	20315031	20311423	20294379
WHB3840	PRISM	Chemagic DNA Blood Kit (Perkin Elmer, MA)	NEBNext UltraII DNA library Prep Kit for Illumina	20314080	20314830	20315031	20311423	20294379
WHB3841	PRISM	Chemagic DNA Blood Kit (Perkin Elmer, MA)	NEBNext UltraII DNA library Prep Kit for Illumina	20314082	20314830	20303896	20300585	20302932
WHB3842	PRISM	Chemagic DNA Blood Kit (Perkin Elmer, MA)	NEBNext UltraII DNA library Prep Kit for Illumina	20314080	20314830	20315031	20311423	20294379
WHB3843	PRISM	Chemagic DNA Blood Kit (Perkin Elmer, MA)	NEBNext UltraII DNA library Prep Kit for Illumina	20314080	20314830	20315031	20311423	20294379
WHB3844	PRISM	Chemagic DNA Blood Kit (Perkin Elmer, MA)	NEBNext UltraII DNA library Prep Kit for Illumina	20314080	20314830	20315031	20311423	20294379
WHB3845	PRISM	Chemagic DNA Blood Kit (Perkin Elmer, MA)	NEBNext UltraII DNA library Prep Kit for Illumina	20314080	20314830	20315031	20311423	20294379
WHB3846	PRISM	Chemagic DNA Blood Kit (Perkin Elmer, MA)	NEBNext UltraII DNA library Prep Kit for Illumina	20314080	20314830	20315031	20311423	20294379
WHB3847	PRISM	Chemagic DNA Blood Kit (Perkin Elmer, MA)	NEBNext UltraII DNA library Prep Kit for Illumina	20314082	20314830	20303896	20300585	20302932
WHB3848	PRISM	Chemagic DNA Blood Kit (Perkin Elmer, MA)	NEBNext UltraII DNA library Prep Kit for Illumina	20314082	20314830	20303896	20300585	20302932
WHB3849	PRISM	Chemagic DNA Blood Kit (Perkin Elmer, MA)	NEBNext UltraII DNA library Prep Kit for Illumina	20314082	20314830	20303896	20300585	20302932
WHB3851	PRISM	Chemagic DNA Blood Kit (Perkin Elmer, MA)	NEBNext UltraII DNA library Prep Kit for Illumina	20314082	20314830	20303896	20300585	20302932
WHB3852	PRISM	Chemagic DNA Blood Kit (Perkin Elmer, MA)	NEBNext UltraII DNA library Prep Kit for Illumina	20314082	20314830	20303896	20300585	20302932
WHB3853	PRISM	Chemagic DNA Blood Kit (Perkin Elmer, MA)	NEBNext UltraII DNA library Prep Kit for Illumina	20314082	20314830	20303896	20300585	20302932
WHB3854	GUSTO	QIAsymphony DSP DNA Midi Kit	NEBNext UltraII DNA library Prep Kit for Illumina	20336598	20345691	20324724	20331198	20328452
WHB3855	GUSTO	QIAsymphony DSP DNA Midi Kit	NEBNext UltraII DNA library Prep Kit for Illumina	20336598	20345691	20324724	20331198	20328452
WHB3856	GUSTO	QIAsymphony DSP DNA Midi Kit	NEBNext UltraII DNA library Prep Kit for Illumina	20336598	20345691	20324724	20331198	20328452
WHB3857	GUSTO	QIAsymphony DSP DNA Midi Kit	NEBNext UltraII DNA library Prep Kit for Illumina	20336598	20345691	20324724	20331198	20328452
WHB3858	GUSTO	QIAsymphony DSP DNA Midi Kit	NEBNext UltraII DNA library Prep Kit for Illumina	20336598	20345691	20324724	20331198	20328452
WHB3859	GUSTO	QIAsymphony DSP DNA Midi Kit	NEBNext UltraII DNA library Prep Kit for Illumina	20336598	20345691	20324724	20331198	20328452
WHB3860	GUSTO	QIAsymphony DSP DNA Midi Kit	NEBNext UltraII DNA library Prep Kit for Illumina	20336598	20345691	20324724	20331198	20328452
WHB3861	GUSTO	QIAsymphony DSP DNA Midi Kit	NEBNext UltraII DNA library Prep Kit for Illumina	20336598	20345691	20324724	20331198	20328452
WHB3862	GUSTO	QIAsymphony DSP DNA Midi Kit	NEBNext UltraII DNA library Prep Kit for Illumina	20336598	20345691	20324724	20331198	20328452
WHB3863	GUSTO	QIAsymphony DSP DNA Midi Kit	NEBNext UltraII DNA library Prep Kit for Illumina	20336598	20345691	20324724	20331198	20328452
WHB3864	GUSTO	QIAsymphony DSP DNA Midi Kit	NEBNext UltraII DNA library Prep Kit for Illumina	20324969	20345691	20320784	20329385	20316761
WHB3865	GUSTO	QIAsymphony DSP DNA Midi Kit	NEBNext UltraII DNA library Prep Kit for Illumina	20324969	20345691	20320784	20329385	20316761
WHB3866	GUSTO	QIAsymphony DSP DNA Midi Kit	NEBNext UltraII DNA library Prep Kit for Illumina	20324969	20345691	20320784	20329385	20316761
WHB3867	GUSTO	QIAsymphony DSP DNA Midi Kit	NEBNext UltraII DNA library Prep Kit for Illumina	20324969	20345691	20320784	20329385	20316761
WHB3868	GUSTO	QIAsymphony DSP DNA Midi Kit	NEBNext UltraII DNA library Prep Kit for Illumina	20324969	20345691	20320784	20329385	20316761
WHB3869	GUSTO	QIAsymphony DSP DNA Midi Kit	NEBNext UltraII DNA library Prep Kit for Illumina	20324969	20345691	20320784	20329385	20316761
WHB3870	GUSTO	QIAsymphony DSP DNA Midi Kit	NEBNext UltraII DNA library Prep Kit for Illumina	20324969	20345691	20320784	20329385	20316761
WHB3871	GUSTO	QIAsymphony DSP DNA Midi Kit	NEBNext UltraII DNA library Prep Kit for Illumina	20324969	20345691	20320784	20329385	20316761
WHB3872	GUSTO	QIAsymphony DSP DNA Midi Kit	NEBNext UltraII DNA library Prep Kit for Illumina	20324969	20345691	20320784	20329385	20316761
WHB3873	GUSTO	QIAsymphony DSP DNA Midi Kit	NEBNext UltraII DNA library Prep Kit for Illumina	20324969	20345691	20320784	20329385	20316761
WHB3874	GUSTO	QIAsymphony DSP DNA Midi Kit	NEBNext UltraII DNA library Prep Kit for Illumina	20324969	20345691	20320784	20329385	20316761
WHB3875	GUSTO	QIAsymphony DSP DNA Midi Kit	NEBNext UltraII DNA library Prep Kit for Illumina	20324969	20345691	20320784	20329385	20316761
WHB3876	GUSTO	QIAsymphony DSP DNA Midi Kit	NEBNext UltraII DNA library Prep Kit for Illumina	20324969	20345691	20320784	20329385	20316761
WHB3877	GUSTO	QIAsymphony DSP DNA Midi Kit	NEBNext UltraII DNA library Prep Kit for Illumina	20324969	20345691	20320784	20329385	20316761
WHB3878	GUSTO	QIAsymphony DSP DNA Midi Kit	NEBNext UltraII DNA library Prep Kit for Illumina	20324969	20345691	20320784	20329385	20316761
WHB3879	GUSTO	QIAsymphony DSP DNA Midi Kit	NEBNext UltraII DNA library Prep Kit for Illumina	20324969	20345691	20320784	20329385	20316761
WHB3880	GUSTO	QIAsymphony DSP DNA Midi Kit	NEBNext UltraII DNA library Prep Kit for Illumina	20324969	20345691	20320784	20329385	20316761
WHB3881	GUSTO	QIAsymphony DSP DNA Midi Kit	NEBNext UltraII DNA library Prep Kit for Illumina	20324969	20345691	20320784	20329385	20316761
WHB3882	GUSTO	QIAsymphony DSP DNA Midi Kit	NEBNext UltraII DNA library Prep Kit for Illumina	20324969	20345691	20320784	20329385	20316761
WHB3883	GUSTO	QIAsymphony DSP DNA Midi Kit	NEBNext UltraII DNA library Prep Kit for Illumina	20331242	20345691	20320784	20331198	20328452
WHB3884	GUSTO	QIAsymphony DSP DNA Midi Kit	NEBNext UltraII DNA library Prep Kit for Illumina	20324969	20345691	20320784	20329385	20316761
WHB3885	GUSTO	QIAsymphony DSP DNA Midi Kit	NEBNext UltraII DNA library Prep Kit for Illumina	20331242	20345691	20320784	20331198	20328452
WHB3887	GUSTO	QIAsymphony DSP DNA Midi Kit	NEBNext UltraII DNA library Prep Kit for Illumina	20331242	20345691	20320784	20331198	20328452
WHB3888	GUSTO	QIAsymphony DSP DNA Midi Kit	NEBNext UltraII DNA library Prep Kit for Illumina	20331242	20345691	20320784	20331198	20328452
WHB3889	GUSTO	QIAsymphony DSP DNA Midi Kit	NEBNext UltraII DNA library Prep Kit for Illumina	20331242	20345691	20320784	20331198	20328452
WHB3890	GUSTO	QIAsymphony DSP DNA Midi Kit	NEBNext UltraII DNA library Prep Kit for Illumina	20331242	20345691	20320784	20331198	20328452
WHB3891	GUSTO	QIAsymphony DSP DNA Midi Kit	NEBNext UltraII DNA library Prep Kit for Illumina	20331242	20345691	20320784	20331198	20328452
WHB3892	GUSTO	QIAsymphony DSP DNA Midi Kit	NEBNext UltraII DNA library Prep Kit for Illumina	20331242	20345691	20320784	20331198	20328452
WHB3893	GUSTO	QIAsymphony DSP DNA Midi Kit	NEBNext UltraII DNA library Prep Kit for Illumina	20331242	20345691	20320784	20331198	20328452
WHB3894	GUSTO	QIAsymphony DSP DNA Midi Kit	NEBNext UltraII DNA library Prep Kit for Illumina	20324969	20345691	20324724	20331198	20328452
WHB3895	GUSTO	QIAsymphony DSP DNA Midi Kit	NEBNext UltraII DNA library Prep Kit for Illumina	20324969	20345691	20324724	20331198	20328452
WHB3896	GUSTO	QIAsymphony DSP DNA Midi Kit	NEBNext UltraII DNA library Prep Kit for Illumina	20324969	20345691	20324724	20331198	20328452
WHB3897	GUSTO	QIAsymphony DSP DNA Midi Kit	NEBNext UltraII DNA library Prep Kit for Illumina	20324969	20345691	20324724	20331198	20328452
WHB3898	GUSTO	QIAsymphony DSP DNA Midi Kit	NEBNext UltraII DNA library Prep Kit for Illumina	20324969	20345691	20324724	20331198	20328452
WHB3899	GUSTO	QIAsymphony DSP DNA Midi Kit	NEBNext UltraII DNA library Prep Kit for Illumina	20324969	20345691	20324724	20331198	20328452
WHB3900	GUSTO	QIAsymphony DSP DNA Midi Kit	NEBNext UltraII DNA library Prep Kit for Illumina	20324969	20345691	20324724	20331198	20328452
WHB3901	GUSTO	QIAsymphony DSP DNA Midi Kit	NEBNext UltraII DNA library Prep Kit for Illumina	20324969	20345691	20324724	20331198	20328452
WHB3902	GUSTO	QIAsymphony DSP DNA Midi Kit	NEBNext UltraII DNA library Prep Kit for Illumina	20324969	20345691	20324724	20331198	20328452
WHB3903	GUSTO	QIAsymphony DSP DNA Midi Kit	NEBNext UltraII DNA library Prep Kit for Illumina	20324969	20345691	20324724	20331198	20328452
WHB3904	GUSTO	QIAsymphony DSP DNA Midi Kit	NEBNext UltraII DNA library Prep Kit for Illumina	20324969	20345691	20324724	20331198	20328452
WHB3905	GUSTO	QIAsymphony DSP DNA Midi Kit	NEBNext UltraII DNA library Prep Kit for Illumina	20324969	20345691	20324724	20331198	20328452
WHB3906	GUSTO	QIAsymphony DSP DNA Midi Kit	NEBNext UltraII DNA library Prep Kit for Illumina	20324969	20345691	20324724	20331198	20328452
WHB3907	GUSTO	QIAsymphony DSP DNA Midi Kit	NEBNext UltraII DNA library Prep Kit for Illumina	20324969	20345691	20324724	20331198	20328452
WHB3908	GUSTO	QIAsymphony DSP DNA Midi Kit	NEBNext UltraII DNA library Prep Kit for Illumina	20324969	20345691	20324724	20331198	20328452
WHB3909	GUSTO	QIAsymphony DSP DNA Midi Kit	NEBNext UltraII DNA library Prep Kit for Illumina	20324969	20345691	20324724	20331198	20328452
WHB3910	GUSTO	QIAsymphony DSP DNA Midi Kit	NEBNext UltraII DNA library Prep Kit for Illumina	20324969	20345691	20324724	20331198	20328452
WHB3911	GUSTO	QIAsymphony DSP DNA Midi Kit	NEBNext UltraII DNA library Prep Kit for Illumina	20324969	20345691	20324724	20331198	20328452
WHB3912	GUSTO	QIAsymphony DSP DNA Midi Kit	NEBNext UltraII DNA library Prep Kit for Illumina	20324969	20345691	20324724	20331198	20328452
WHB3913	GUSTO	QIAsymphony DSP DNA Midi Kit	NEBNext UltraII DNA library Prep Kit for Illumina	20324969	20345691	20324724	20331198	20328452
WHB3914	GUSTO	QIAsymphony DSP DNA Midi Kit	NEBNext UltraII DNA library Prep Kit for Illumina	20324969	20345691	20324724	20331198	20328452
WHB3915	GUSTO	QIAsymphony DSP DNA Midi Kit	NEBNext UltraII DNA library Prep Kit for Illumina	20324969	20345691	20320784	20331198	20328452
WHB3916	GUSTO	QIAsymphony DSP DNA Midi Kit	NEBNext UltraII DNA library Prep Kit for Illumina	20324969	20345691	20320784	20331198	20328452
WHB3917	GUSTO	QIAsymphony DSP DNA Midi Kit	NEBNext UltraII DNA library Prep Kit for Illumina	20324969	20345691	20320784	20331198	20328452
WHB3918	GUSTO	QIAsymphony DSP DNA Midi Kit	NEBNext UltraII DNA library Prep Kit for Illumina	20324969	20345691	20320784	20331198	20328452
WHB3919	GUSTO	QIAsymphony DSP DNA Midi Kit	NEBNext UltraII DNA library Prep Kit for Illumina	20324969	20345691	20320784	20331198	20328452
WHB3920	GUSTO	QIAsymphony DSP DNA Midi Kit	NEBNext UltraII DNA library Prep Kit for Illumina	20324969	20345691	20320784	20331198	20328452
WHB3921	GUSTO	QIAsymphony DSP DNA Midi Kit	NEBNext UltraII DNA library Prep Kit for Illumina	20324969	20345691	20320784	20331198	20328452
WHB3922	GUSTO	QIAsymphony DSP DNA Midi Kit	NEBNext UltraII DNA library Prep Kit for Illumina	20324969	20345691	20320784	20331198	20328452
WHB3923	GUSTO	QIAsymphony DSP DNA Midi Kit	NEBNext UltraII DNA library Prep Kit for Illumina	20324969	20345691	20320784	20331198	20328452
WHB3924	GUSTO	QIAsymphony DSP DNA Midi Kit	NEBNext UltraII DNA library Prep Kit for Illumina	20324969	20345691	20324724	20331198	20328452
WHB3925	GUSTO	QIAsymphony DSP DNA Midi Kit	NEBNext UltraII DNA library Prep Kit for Illumina	20324969	20345691	20324724	20331198	20328452
WHB3926	GUSTO	QIAsymphony DSP DNA Midi Kit	NEBNext UltraII DNA library Prep Kit for Illumina	20324969	20345691	20320784	20331198	20328452
WHB3927	GUSTO	QIAsymphony DSP DNA Midi Kit	NEBNext UltraII DNA library Prep Kit for Illumina	20324969	20345691	20324724	20331198	20328452
WHB3928	GUSTO	QIAsymphony DSP DNA Midi Kit	NEBNext UltraII DNA library Prep Kit for Illumina	20324969	20345691	20324724	20331198	20328452
WHB3929	GUSTO	QIAsymphony DSP DNA Midi Kit	NEBNext UltraII DNA library Prep Kit for Illumina	20324969	20345691	20324724	20331198	20328452
WHB3930	GUSTO	QIAsymphony DSP DNA Midi Kit	NEBNext UltraII DNA library Prep Kit for Illumina	20324969	20345691	20324724	20331198	20328452
WHB3931	GUSTO	QIAsymphony DSP DNA Midi Kit	NEBNext UltraII DNA library Prep Kit for Illumina	20324969	20345691	20324724	20331198	20328452
WHB3932	GUSTO	QIAsymphony DSP DNA Midi Kit	NEBNext UltraII DNA library Prep Kit for Illumina	20324969	20345691	20324724	20331198	20328452
WHB3933	GUSTO	QIAsymphony DSP DNA Midi Kit	NEBNext UltraII DNA library Prep Kit for Illumina	20324969	20345691	20324724	20331198	20328452
WHB3934	GUSTO	QIAsymphony DSP DNA Midi Kit	NEBNext UltraII DNA library Prep Kit for Illumina	20331242	20345691	20324724	20331198	20328452
WHB3935	GUSTO	QIAsymphony DSP DNA Midi Kit	NEBNext UltraII DNA library Prep Kit for Illumina	20331242	20345691	20324724	20331198	20328452
WHB3936	GUSTO	QIAsymphony DSP DNA Midi Kit	NEBNext UltraII DNA library Prep Kit for Illumina	20336598	20345691	20324724	20331198	20328452
WHB3937	GUSTO	QIAsymphony DSP DNA Midi Kit	NEBNext UltraII DNA library Prep Kit for Illumina	20331242	20345691	20324724	20331198	20328452
WHB3938	GUSTO	QIAsymphony DSP DNA Midi Kit	NEBNext UltraII DNA library Prep Kit for Illumina	20331242	20345691	20324724	20331198	20328452
WHB3939	GUSTO	QIAsymphony DSP DNA Midi Kit	NEBNext UltraII DNA library Prep Kit for Illumina	20331242	20345691	20324724	20331198	20328452
WHB3940	GUSTO	QIAsymphony DSP DNA Midi Kit	NEBNext UltraII DNA library Prep Kit for Illumina	20331242	20345691	20324724	20331198	20328452
WHB3941	GUSTO	QIAsymphony DSP DNA Midi Kit	NEBNext UltraII DNA library Prep Kit for Illumina	20331242	20345691	20324724	20331198	20328452
WHB3942	GUSTO	QIAsymphony DSP DNA Midi Kit	NEBNext UltraII DNA library Prep Kit for Illumina	20331242	20345691	20324724	20331198	20328452
WHB3943	GUSTO	QIAsymphony DSP DNA Midi Kit	NEBNext UltraII DNA library Prep Kit for Illumina	20331242	20345691	20324724	20331198	20328452
WHB3944	GUSTO	QIAsymphony DSP DNA Midi Kit	NEBNext UltraII DNA library Prep Kit for Illumina	20331242	20345691	20324724	20331198	20328452
WHB3945	GUSTO	QIAsymphony DSP DNA Midi Kit	NEBNext UltraII DNA library Prep Kit for Illumina	20336598	20331251	20324724	20331198	20328452
WHB3946	GUSTO	QIAsymphony DSP DNA Midi Kit	NEBNext UltraII DNA library Prep Kit for Illumina	20336598	20331251	20324724	20331198	20328452
WHB3947	GUSTO	QIAsymphony DSP DNA Midi Kit	NEBNext UltraII DNA library Prep Kit for Illumina	20336598	20345691	20324724	20331198	20328452
WHB3948	GUSTO	QIAsymphony DSP DNA Midi Kit	NEBNext UltraII DNA library Prep Kit for Illumina	20336598	20331251	20324724	20331198	20328452
WHB3949	GUSTO	QIAsymphony DSP DNA Midi Kit	NEBNext UltraII DNA library Prep Kit for Illumina	20336598	20331251	20324724	20331198	20328452
WHB3950	GUSTO	QIAsymphony DSP DNA Midi Kit	NEBNext UltraII DNA library Prep Kit for Illumina	20336598	20331251	20324724	20331198	20328452
WHB3951	GUSTO	QIAsymphony DSP DNA Midi Kit	NEBNext UltraII DNA library Prep Kit for Illumina	20336598	20331251	20324724	20331198	20328452
WHB3952	GUSTO	QIAsymphony DSP DNA Midi Kit	NEBNext UltraII DNA library Prep Kit for Illumina	20336598	20345691	20324724	20331198	20328452
WHB3953	GUSTO	QIAsymphony DSP DNA Midi Kit	NEBNext UltraII DNA library Prep Kit for Illumina	20336598	20345691	20324724	20331198	20328452
WHB3954	GUSTO	QIAsymphony DSP DNA Midi Kit	NEBNext UltraII DNA library Prep Kit for Illumina	20336598	20345691	20324724	20331198	20328452
WHB3955	GUSTO	QIAsymphony DSP DNA Midi Kit	NEBNext UltraII DNA library Prep Kit for Illumina	20336598	20331251	20324724	20331198	20328452
WHB3956	GUSTO	QIAsymphony DSP DNA Midi Kit	NEBNext UltraII DNA library Prep Kit for Illumina	20336598	20331251	20324724	20331198	20328452
WHB3957	GUSTO	QIAsymphony DSP DNA Midi Kit	NEBNext UltraII DNA library Prep Kit for Illumina	20336598	20331251	20324724	20331198	20328452
WHB3958	GUSTO	QIAsymphony DSP DNA Midi Kit	NEBNext UltraII DNA library Prep Kit for Illumina	20336598	20331251	20324724	20331198	20328452
WHB3959	GUSTO	QIAsymphony DSP DNA Midi Kit	NEBNext UltraII DNA library Prep Kit for Illumina	20336598	20345691	20324724	20331198	20328452
WHB3961	GUSTO	QIAsymphony DSP DNA Midi Kit	NEBNext UltraII DNA library Prep Kit for Illumina	20336598	20345691	20324724	20331198	20328452
WHB3962	GUSTO	QIAsymphony DSP DNA Midi Kit	NEBNext UltraII DNA library Prep Kit for Illumina	20336598	20345691	20324724	20331198	20328452
WHB3963	GUSTO	QIAsymphony DSP DNA Midi Kit	NEBNext UltraII DNA library Prep Kit for Illumina	20336598	20345691	20324724	20331198	20328452
WHB3964	GUSTO	QIAsymphony DSP DNA Midi Kit	NEBNext UltraII DNA library Prep Kit for Illumina	20336598	20345691	20324724	20331198	20328452
WHB3965	GUSTO	QIAsymphony DSP DNA Midi Kit	NEBNext UltraII DNA library Prep Kit for Illumina	20336598	20345691	20324724	20331198	20328452
WHB3966	GUSTO	QIAsymphony DSP DNA Midi Kit	NEBNext UltraII DNA library Prep Kit for Illumina	20336598	20345691	20324724	20331198	20328452
WHB3967	GUSTO	QIAsymphony DSP DNA Midi Kit	NEBNext UltraII DNA library Prep Kit for Illumina	20336598	20345691	20324724	20331198	20328452
WHB3968	GUSTO	QIAsymphony DSP DNA Midi Kit	NEBNext UltraII DNA library Prep Kit for Illumina	20336598	20345691	20324724	20331198	20328452
WHB3969	GUSTO	QIAsymphony DSP DNA Midi Kit	NEBNext UltraII DNA library Prep Kit for Illumina	20336598	20345691	20324724	20331198	20328452
WHB3970	GUSTO	QIAsymphony DSP DNA Midi Kit	NEBNext UltraII DNA library Prep Kit for Illumina	20336598	20345691	20324724	20331198	20328452
WHB3971	GUSTO	QIAsymphony DSP DNA Midi Kit	NEBNext UltraII DNA library Prep Kit for Illumina	20336598	20345691	20324724	20331198	20328452
WHB3972	GUSTO	QIAsymphony DSP DNA Midi Kit	NEBNext UltraII DNA library Prep Kit for Illumina	20336598	20345691	20324724	20331198	20328452
WHB3973	GUSTO	QIAsymphony DSP DNA Midi Kit	NEBNext UltraII DNA library Prep Kit for Illumina	20336598	20345691	20324724	20331198	20328452
WHB3974	GUSTO	QIAsymphony DSP DNA Midi Kit	NEBNext UltraII DNA library Prep Kit for Illumina	20336598	20345691	20324724	20331198	20328452
WHB3975	GUSTO	QIAsymphony DSP DNA Midi Kit	NEBNext UltraII DNA library Prep Kit for Illumina	20336598	20345691	20324724	20331198	20328452
WHB3976	GUSTO	QIAsymphony DSP DNA Midi Kit	NEBNext UltraII DNA library Prep Kit for Illumina	20336598	20345691	20324724	20331198	20328452
WHB3977	GUSTO	QIAsymphony DSP DNA Midi Kit	NEBNext UltraII DNA library Prep Kit for Illumina	20336598	20345691	20324724	20331198	20328452
WHB3978	GUSTO	QIAsymphony DSP DNA Midi Kit	NEBNext UltraII DNA library Prep Kit for Illumina	20336598	20345691	20324724	20331198	20328452
WHB3979	GUSTO	QIAsymphony DSP DNA Midi Kit	NEBNext UltraII DNA library Prep Kit for Illumina	20336598	20345691	20324724	20331198	20328452
WHB3980	GUSTO	QIAsymphony DSP DNA Midi Kit	NEBNext UltraII DNA library Prep Kit for Illumina	20336598	20345691	20324724	20331198	20328452
WHB3981	GUSTO	QIAsymphony DSP DNA Midi Kit	NEBNext UltraII DNA library Prep Kit for Illumina	20336598	20345691	20324724	20331198	20328452
WHB3982	GUSTO	QIAsymphony DSP DNA Midi Kit	NEBNext UltraII DNA library Prep Kit for Illumina	20336598	20345691	20324724	20331198	20328452
WHB3984	GUSTO	QIAsymphony DSP DNA Midi Kit	NEBNext UltraII DNA library Prep Kit for Illumina	20336598	20345691	20324724	20331198	20328452
WHB3985	GUSTO	QIAsymphony DSP DNA Midi Kit	NEBNext UltraII DNA library Prep Kit for Illumina	20336598	20345691	20324724	20331198	20328452
WHB3986	GUSTO	QIAsymphony DSP DNA Midi Kit	NEBNext UltraII DNA library Prep Kit for Illumina	20336598	20345691	20324724	20331198	20328452
WHB3987	GUSTO	QIAsymphony DSP DNA Midi Kit	NEBNext UltraII DNA library Prep Kit for Illumina	20336598	20345691	20324724	20331198	20328452
WHB3988	GUSTO	QIAsymphony DSP DNA Midi Kit	NEBNext UltraII DNA library Prep Kit for Illumina	20336598	20345691	20324724	20331198	20328452
WHB3989	GUSTO	QIAsymphony DSP DNA Midi Kit	NEBNext UltraII DNA library Prep Kit for Illumina	20336598	20345691	20324724	20331198	20328452
WHB3990	GUSTO	QIAsymphony DSP DNA Midi Kit	NEBNext UltraII DNA library Prep Kit for Illumina	20336598	20345691	20324724	20331198	20328452
WHB3991	GUSTO	QIAsymphony DSP DNA Midi Kit	NEBNext UltraII DNA library Prep Kit for Illumina	20336598	20345691	20324724	20331198	20328452
WHB3992	GUSTO	QIAsymphony DSP DNA Midi Kit	NEBNext UltraII DNA library Prep Kit for Illumina	20336598	20345691	20324724	20331198	20328452
WHB3993	GUSTO	QIAsymphony DSP DNA Midi Kit	NEBNext UltraII DNA library Prep Kit for Illumina	20336598	20345691	20324724	20331198	20328452
WHB3994	GUSTO	QIAsymphony DSP DNA Midi Kit	NEBNext UltraII DNA library Prep Kit for Illumina	20336598	20345691	20324724	20331198	20328452
WHB3995	GUSTO	QIAsymphony DSP DNA Midi Kit	NEBNext UltraII DNA library Prep Kit for Illumina	20336598	20345691	20324724	20331198	20328452
WHB3996	GUSTO	QIAsymphony DSP DNA Midi Kit	NEBNext UltraII DNA library Prep Kit for Illumina	20336598	20345691	20324724	20331198	20328452
WHB3997	GUSTO	QIAsymphony DSP DNA Midi Kit	NEBNext UltraII DNA library Prep Kit for Illumina	20336598	20345691	20324724	20331198	20328452
WHB3998	GUSTO	QIAsymphony DSP DNA Midi Kit	NEBNext UltraII DNA library Prep Kit for Illumina	20336598	20345691	20324724	20331198	20328452
WHB3999	GUSTO	QIAsymphony DSP DNA Midi Kit	NEBNext UltraII DNA library Prep Kit for Illumina	20336598	20345691	20324724	20331198	20328452
WHB4001	GUSTO	QIAsymphony DSP DNA Midi Kit	NEBNext UltraII DNA library Prep Kit for Illumina	20336598	20345691	20324724	20331198	20328452
WHB4002	GUSTO	QIAsymphony DSP DNA Midi Kit	NEBNext UltraII DNA library Prep Kit for Illumina	20336598	20345691	20324724	20331198	20328452
WHB4003	GUSTO	QIAsymphony DSP DNA Midi Kit	NEBNext UltraII DNA library Prep Kit for Illumina	20336598	20345691	20324724	20331198	20328452
WHB4004	GUSTO	QIAsymphony DSP DNA Midi Kit	NEBNext UltraII DNA library Prep Kit for Illumina	20336598	20345691	20324724	20331198	20328452
WHB4005	GUSTO	QIAsymphony DSP DNA Midi Kit	NEBNext UltraII DNA library Prep Kit for Illumina	20336598	20345691	20324724	20331198	20328452
WHB4006	GUSTO	QIAsymphony DSP DNA Midi Kit	NEBNext UltraII DNA library Prep Kit for Illumina	20336598	20345691	20324724	20331198	20328452
WHB4007	GUSTO	QIAsymphony DSP DNA Midi Kit	NEBNext UltraII DNA library Prep Kit for Illumina	20336598	20345691	20324724	20331198	20328452
WHB4008	GUSTO	QIAsymphony DSP DNA Midi Kit	NEBNext UltraII DNA library Prep Kit for Illumina	20336598	20345691	20324724	20331198	20328452
WHB4009	GUSTO	QIAsymphony DSP DNA Midi Kit	NEBNext UltraII DNA library Prep Kit for Illumina	20336598	20345691	20324724	20331198	20328452
WHB4010	GUSTO	QIAsymphony DSP DNA Midi Kit	NEBNext UltraII DNA library Prep Kit for Illumina	20336598	20345691	20324724	20331198	20328452
WHB4011	GUSTO	QIAsymphony DSP DNA Midi Kit	NEBNext UltraII DNA library Prep Kit for Illumina	20336598	20345691	20324724	20331198	20328452
WHB4012	GUSTO	QIAsymphony DSP DNA Midi Kit	NEBNext UltraII DNA library Prep Kit for Illumina	20336598	20345691	20324724	20331198	20328452
WHB4013	GUSTO	QIAsymphony DSP DNA Midi Kit	NEBNext UltraII DNA library Prep Kit for Illumina	20336598	20345691	20324724	20331198	20328452
WHB4014	GUSTO	QIAsymphony DSP DNA Midi Kit	NEBNext UltraII DNA library Prep Kit for Illumina	20336598	20345691	20324724	20331198	20328452
WHB4015	GUSTO	QIAsymphony DSP DNA Midi Kit	NEBNext UltraII DNA library Prep Kit for Illumina	20336598	20345691	20324724	20331198	20328452
WHB4016	GUSTO	QIAsymphony DSP DNA Midi Kit	NEBNext UltraII DNA library Prep Kit for Illumina	20336598	20345691	20324724	20331198	20328452
WHB4017	GUSTO	QIAsymphony DSP DNA Midi Kit	NEBNext UltraII DNA library Prep Kit for Illumina	20336598	20345691	20324724	20331198	20328452
WHB4018	GUSTO	QIAsymphony DSP DNA Midi Kit	NEBNext UltraII DNA library Prep Kit for Illumina	20336598	20345691	20324724	20331198	20328452
WHB4019	GUSTO	QIAsymphony DSP DNA Midi Kit	NEBNext UltraII DNA library Prep Kit for Illumina	20336598	20345691	20324724	20331198	20328452
WHB4020	GUSTO	QIAsymphony DSP DNA Midi Kit	NEBNext UltraII DNA library Prep Kit for Illumina	20336598	20345691	20324724	20331198	20328452
WHB4021	GUSTO	QIAsymphony DSP DNA Midi Kit	NEBNext UltraII DNA library Prep Kit for Illumina	20336598	20345691	20324724	20331198	20328452
WHB4022	GUSTO	QIAsymphony DSP DNA Midi Kit	NEBNext UltraII DNA library Prep Kit for Illumina	20336598	20345691	20324724	20331198	20328452
WHB4023	GUSTO	QIAsymphony DSP DNA Midi Kit	NEBNext UltraII DNA library Prep Kit for Illumina	20336598	20345691	20324724	20331198	20328452
WHB4024	GUSTO	QIAsymphony DSP DNA Midi Kit	NEBNext UltraII DNA library Prep Kit for Illumina	20336598	20345691	20324724	20331198	20328452
WHB4025	GUSTO	QIAsymphony DSP DNA Midi Kit	NEBNext UltraII DNA library Prep Kit for Illumina	20336598	20345691	20324724	20331198	20328452
WHB4026	GUSTO	QIAsymphony DSP DNA Midi Kit	NEBNext UltraII DNA library Prep Kit for Illumina	20336598	20345691	20324724	20331198	20328452
WHB4027	GUSTO	QIAsymphony DSP DNA Midi Kit	NEBNext UltraII DNA library Prep Kit for Illumina	20336598	20345691	20324724	20331198	20328452
WHB4028	GUSTO	QIAsymphony DSP DNA Midi Kit	NEBNext UltraII DNA library Prep Kit for Illumina	20336598	20345691	20324724	20331198	20328452
WHB4029	GUSTO	QIAsymphony DSP DNA Midi Kit	NEBNext UltraII DNA library Prep Kit for Illumina	20336598	20345691	20324724	20331198	20328452
WHB4030	GUSTO	QIAsymphony DSP DNA Midi Kit	NEBNext UltraII DNA library Prep Kit for Illumina	20336598	20345691	20324724	20331198	20328452
WHB4031	GUSTO	QIAsymphony DSP DNA Midi Kit	NEBNext UltraII DNA library Prep Kit for Illumina	20336598	20345691	20324724	20331198	20328452
WHB4032	GUSTO	QIAsymphony DSP DNA Midi Kit	NEBNext UltraII DNA library Prep Kit for Illumina	20336598	20345691	20324724	20331198	20328452
WHB4033	GUSTO	QIAsymphony DSP DNA Midi Kit	NEBNext UltraII DNA library Prep Kit for Illumina	20336598	20345691	20324724	20331198	20328452
WHB4034	GUSTO	QIAsymphony DSP DNA Midi Kit	NEBNext UltraII DNA library Prep Kit for Illumina	20336598	20345691	20324724	20331198	20328452
WHB4035	GUSTO	QIAsymphony DSP DNA Midi Kit	NEBNext UltraII DNA library Prep Kit for Illumina	20336598	20345691	20324724	20331198	20328452
WHB4036	GUSTO	QIAsymphony DSP DNA Midi Kit	NEBNext UltraII DNA library Prep Kit for Illumina	20336598	20345691	20324724	20331198	20328452
WHB4037	GUSTO	QIAsymphony DSP DNA Midi Kit	NEBNext UltraII DNA library Prep Kit for Illumina	20336598	20345691	20324724	20331198	20328452
WHB4038	GUSTO	QIAsymphony DSP DNA Midi Kit	NEBNext UltraII DNA library Prep Kit for Illumina	20336598	20345691	20324724	20331198	20328452
WHB4039	GUSTO	QIAsymphony DSP DNA Midi Kit	NEBNext UltraII DNA library Prep Kit for Illumina	20336598	20345691	20324724	20331198	20328452
WHB4040	GUSTO	QIAsymphony DSP DNA Midi Kit	NEBNext UltraII DNA library Prep Kit for Illumina	20336598	20345691	20324724	20331198	20328452
WHB4041	GUSTO	QIAsymphony DSP DNA Midi Kit	NEBNext UltraII DNA library Prep Kit for Illumina	20336598	20345691	20324724	20331198	20328452
WHB4042	GUSTO	QIAsymphony DSP DNA Midi Kit	NEBNext UltraII DNA library Prep Kit for Illumina	20336598	20345691	20324724	20331198	20328452
WHB4045	GUSTO	QIAsymphony DSP DNA Midi Kit	NEBNext UltraII DNA library Prep Kit for Illumina	20336598	20345691	20324724	20331198	20328452
WHB4046	GUSTO	QIAsymphony DSP DNA Midi Kit	NEBNext UltraII DNA library Prep Kit for Illumina	20336598	20345691	20324724	20331198	20328452
WHB4047	GUSTO	QIAsymphony DSP DNA Midi Kit	NEBNext UltraII DNA library Prep Kit for Illumina	20336598	20345691	20324724	20331198	20328452
WHB4048	GUSTO	QIAsymphony DSP DNA Midi Kit	NEBNext UltraII DNA library Prep Kit for Illumina	20336598	20345691	20324724	20331198	20328452
WHB4049	GUSTO	QIAsymphony DSP DNA Midi Kit	NEBNext UltraII DNA library Prep Kit for Illumina	20336598	20345691	20324724	20331198	20328452
WHB4050	GUSTO	QIAsymphony DSP DNA Midi Kit	NEBNext UltraII DNA library Prep Kit for Illumina	20336598	20345691	20324724	20331198	20328452
WHB4051	GUSTO	QIAsymphony DSP DNA Midi Kit	NEBNext UltraII DNA library Prep Kit for Illumina	20336598	20345691	20324724	20331198	20328452
WHB4052	GUSTO	QIAsymphony DSP DNA Midi Kit	NEBNext UltraII DNA library Prep Kit for Illumina	20336598	20345691	20324724	20331195	20328452
WHB4053	GUSTO	QIAsymphony DSP DNA Midi Kit	NEBNext UltraII DNA library Prep Kit for Illumina	20336598	20345691	20324724	20331195	20328452
WHB4054	GUSTO	QIAsymphony DSP DNA Midi Kit	NEBNext UltraII DNA library Prep Kit for Illumina	20336598	20345691	20324724	20331198	20328452
WHB4055	GUSTO	QIAsymphony DSP DNA Midi Kit	NEBNext UltraII DNA library Prep Kit for Illumina	20336598	20345691	20324724	20331198	20328452
WHB4056	GUSTO	QIAsymphony DSP DNA Midi Kit	NEBNext UltraII DNA library Prep Kit for Illumina	20336598	20345691	20324724	20331195	20328452
WHB4057	GUSTO	QIAsymphony DSP DNA Midi Kit	NEBNext UltraII DNA library Prep Kit for Illumina	20336598	20345691	20324724	20331195	20328452
WHB4058	GUSTO	QIAsymphony DSP DNA Midi Kit	NEBNext UltraII DNA library Prep Kit for Illumina	20336598	20345691	20324724	20331195	20328452
WHB4059	GUSTO	QIAsymphony DSP DNA Midi Kit	NEBNext UltraII DNA library Prep Kit for Illumina	20336598	20345691	20324724	20331195	20328452
WHB4060	GUSTO	QIAsymphony DSP DNA Midi Kit	NEBNext UltraII DNA library Prep Kit for Illumina	20336598	20345691	20324724	20331195	20328452
WHB4061	GUSTO	QIAsymphony DSP DNA Midi Kit	NEBNext UltraII DNA library Prep Kit for Illumina	20336598	20345691	20324724	20331195	20328452
WHB4062	GUSTO	QIAsymphony DSP DNA Midi Kit	NEBNext UltraII DNA library Prep Kit for Illumina	20336598	20345691	20324724	20331195	20328452
WHB4063	GUSTO	QIAsymphony DSP DNA Midi Kit	NEBNext UltraII DNA library Prep Kit for Illumina	20336598	20345691	20324724	20331195	20328452
WHB4064	GUSTO	QIAsymphony DSP DNA Midi Kit	NEBNext UltraII DNA library Prep Kit for Illumina	20336598	20345691	20324724	20331198	20328452
WHB4065	GUSTO	QIAsymphony DSP DNA Midi Kit	NEBNext UltraII DNA library Prep Kit for Illumina	20336598	20345691	20324724	20331198	20328452
WHB4066	GUSTO	QIAsymphony DSP DNA Midi Kit	NEBNext UltraII DNA library Prep Kit for Illumina	20336598	20345691	20324724	20331198	20328452
WHB4067	GUSTO	QIAsymphony DSP DNA Midi Kit	NEBNext UltraII DNA library Prep Kit for Illumina	20336598	20345691	20324724	20331198	20328452
WHB4068	GUSTO	QIAsymphony DSP DNA Midi Kit	NEBNext UltraII DNA library Prep Kit for Illumina	20336598	20345691	20324724	20331198	20328452
WHB4069	GUSTO	QIAsymphony DSP DNA Midi Kit	NEBNext UltraII DNA library Prep Kit for Illumina	20336598	20345691	20324724	20331198	20328452
WHB4070	GUSTO	QIAsymphony DSP DNA Midi Kit	NEBNext UltraII DNA library Prep Kit for Illumina	20336598	20345691	20324724	20331198	20328452
WHB4071	GUSTO	QIAsymphony DSP DNA Midi Kit	NEBNext UltraII DNA library Prep Kit for Illumina	20336598	20345691	20324724	20331198	20328452
WHB4072	GUSTO	QIAsymphony DSP DNA Midi Kit	NEBNext UltraII DNA library Prep Kit for Illumina	20336598	20345691	20324724	20331198	20328452
WHB4073	GUSTO	QIAsymphony DSP DNA Midi Kit	NEBNext UltraII DNA library Prep Kit for Illumina	20336598	20345691	20324724	20331198	20328452
WHB4074	GUSTO	QIAsymphony DSP DNA Midi Kit	NEBNext UltraII DNA library Prep Kit for Illumina	20336598	20345691	20324724	20331195	20328452
WHB4075	GUSTO	QIAsymphony DSP DNA Midi Kit	NEBNext UltraII DNA library Prep Kit for Illumina	20336598	20345691	20324724	20331195	20328452
WHB4076	GUSTO	QIAsymphony DSP DNA Midi Kit	NEBNext UltraII DNA library Prep Kit for Illumina	20336598	20345691	20324724	20331195	20328452
WHB4077	GUSTO	QIAsymphony DSP DNA Midi Kit	NEBNext UltraII DNA library Prep Kit for Illumina	20336598	20345691	20324724	20331195	20328452
WHB4078	GUSTO	QIAsymphony DSP DNA Midi Kit	NEBNext UltraII DNA library Prep Kit for Illumina	20336598	20345691	20324724	20331195	20328452
WHB4079	GUSTO	QIAsymphony DSP DNA Midi Kit	NEBNext UltraII DNA library Prep Kit for Illumina	20336598	20345691	20324724	20331195	20328452
WHB4080	GUSTO	QIAsymphony DSP DNA Midi Kit	NEBNext UltraII DNA library Prep Kit for Illumina	20336598	20345691	20324724	20331195	20328452
WHB4081	GUSTO	QIAsymphony DSP DNA Midi Kit	NEBNext UltraII DNA library Prep Kit for Illumina	20336598	20345691	20324724	20331198	20328452
WHB4082	GUSTO	QIAsymphony DSP DNA Midi Kit	NEBNext UltraII DNA library Prep Kit for Illumina	20336598	20345691	20324724	20331195	20328452
WHB4083	GUSTO	QIAsymphony DSP DNA Midi Kit	NEBNext UltraII DNA library Prep Kit for Illumina	20336598	20345691	20324724	20331195	20328452
WHB4084	GUSTO	QIAsymphony DSP DNA Midi Kit	NEBNext UltraII DNA library Prep Kit for Illumina	20336598	20345691	20324724	20331195	20328452
WHB4085	GUSTO	QIAsymphony DSP DNA Midi Kit	NEBNext UltraII DNA library Prep Kit for Illumina	20336598	20345691	20324724	20331198	20328452
WHB4086	GUSTO	QIAsymphony DSP DNA Midi Kit	NEBNext UltraII DNA library Prep Kit for Illumina	20336598	20345691	20324724	20331198	20328452
WHB4087	GUSTO	QIAsymphony DSP DNA Midi Kit	NEBNext UltraII DNA library Prep Kit for Illumina	20336598	20345691	20324724	20331198	20328452
WHB4088	GUSTO	QIAsymphony DSP DNA Midi Kit	NEBNext UltraII DNA library Prep Kit for Illumina	20336598	20345691	20324724	20331198	20328452
WHB4089	GUSTO	QIAsymphony DSP DNA Midi Kit	NEBNext UltraII DNA library Prep Kit for Illumina	20336598	20345691	20324724	20331198	20328452
WHB4090	GUSTO	QIAsymphony DSP DNA Midi Kit	NEBNext UltraII DNA library Prep Kit for Illumina	20336598	20345691	20324724	20331198	20328452
WHB4091	GUSTO	QIAsymphony DSP DNA Midi Kit	NEBNext UltraII DNA library Prep Kit for Illumina	20336598	20345691	20324724	20331198	20328452
WHB4092	GUSTO	QIAsymphony DSP DNA Midi Kit	NEBNext UltraII DNA library Prep Kit for Illumina	20336598	20345691	20324724	20331198	20328452
WHB4094	GUSTO	QIAsymphony DSP DNA Midi Kit	NEBNext UltraII DNA library Prep Kit for Illumina	20336598	20345691	20324724	20331198	20328452
WHB4095	GUSTO	QIAsymphony DSP DNA Midi Kit	NEBNext UltraII DNA library Prep Kit for Illumina	20336598	20345691	20324724	20331198	20328452
WHB4096	GUSTO	QIAsymphony DSP DNA Midi Kit	NEBNext UltraII DNA library Prep Kit for Illumina	20336598	20345691	20324724	20331198	20328452
WHB4097	GUSTO	QIAsymphony DSP DNA Midi Kit	NEBNext UltraII DNA library Prep Kit for Illumina	20336598	20345691	20324724	20331198	20328452
WHB4098	GUSTO	QIAsymphony DSP DNA Midi Kit	NEBNext UltraII DNA library Prep Kit for Illumina	20336598	20345691	20324724	20331198	20328452
WHB4099	GUSTO	QIAsymphony DSP DNA Midi Kit	NEBNext UltraII DNA library Prep Kit for Illumina	20336598	20345691	20324724	20331198	20328452
WHB4100	GUSTO	QIAsymphony DSP DNA Midi Kit	NEBNext UltraII DNA library Prep Kit for Illumina	20336598	20345691	20324724	20331198	20328452
WHB4101	GUSTO	QIAsymphony DSP DNA Midi Kit	NEBNext UltraII DNA library Prep Kit for Illumina	20336598	20345691	20324724	20331198	20328452
WHB4102	GUSTO	QIAsymphony DSP DNA Midi Kit	NEBNext UltraII DNA library Prep Kit for Illumina	20336598	20345691	20324724	20331198	20328452
WHB4104	GUSTO	QIAsymphony DSP DNA Midi Kit	NEBNext UltraII DNA library Prep Kit for Illumina	20336598	20345691	20324724	20331198	20328452
WHB4105	GUSTO	QIAsymphony DSP DNA Midi Kit	NEBNext UltraII DNA library Prep Kit for Illumina	20336598	20345691	20324724	20331198	20328452
WHB4106	GUSTO	QIAsymphony DSP DNA Midi Kit	NEBNext UltraII DNA library Prep Kit for Illumina	20336598	20345691	20324724	20331198	20328452
WHB4107	GUSTO	QIAsymphony DSP DNA Midi Kit	NEBNext UltraII DNA library Prep Kit for Illumina	20336598	20345691	20324724	20331198	20328452
WHB4108	GUSTO	QIAsymphony DSP DNA Midi Kit	NEBNext UltraII DNA library Prep Kit for Illumina	20336598	20345691	20324724	20331198	20328452
WHB4109	GUSTO	QIAsymphony DSP DNA Midi Kit	NEBNext UltraII DNA library Prep Kit for Illumina	20336598	20345691	20324724	20336625	20328452
WHB4110	GUSTO	QIAsymphony DSP DNA Midi Kit	NEBNext UltraII DNA library Prep Kit for Illumina	20336598	20345691	20324724	20331198	20328452
WHB4111	GUSTO	QIAsymphony DSP DNA Midi Kit	NEBNext UltraII DNA library Prep Kit for Illumina	20336598	20345691	20324724	20331198	20328452
WHB4112	GUSTO	QIAsymphony DSP DNA Midi Kit	NEBNext UltraII DNA library Prep Kit for Illumina	20336598	20345691	20324724	20331198	20328452
WHB4113	GUSTO	QIAsymphony DSP DNA Midi Kit	NEBNext UltraII DNA library Prep Kit for Illumina	20336598	20345691	20324724	20331198	20328452
WHB4114	GUSTO	QIAsymphony DSP DNA Midi Kit	NEBNext UltraII DNA library Prep Kit for Illumina	20336598	20345691	20324724	20331198	20328452
WHB4116	GUSTO	QIAsymphony DSP DNA Midi Kit	NEBNext UltraII DNA library Prep Kit for Illumina	20336598	20345691	20324724	20331198	20328452
WHB4117	GUSTO	QIAsymphony DSP DNA Midi Kit	NEBNext UltraII DNA library Prep Kit for Illumina	20336598	20345691	20324724	20331198	20328452
WHB4118	GUSTO	QIAsymphony DSP DNA Midi Kit	NEBNext UltraII DNA library Prep Kit for Illumina	20336598	20345691	20324724	20331198	20328452
WHB4119	GUSTO	QIAsymphony DSP DNA Midi Kit	NEBNext UltraII DNA library Prep Kit for Illumina	20336598	20345691	20344239	20331198	20328452
WHB4120	GUSTO	QIAsymphony DSP DNA Midi Kit	NEBNext UltraII DNA library Prep Kit for Illumina	20336598	20345691	20324724	20331198	20328452
WHB4121	GUSTO	QIAsymphony DSP DNA Midi Kit	NEBNext UltraII DNA library Prep Kit for Illumina	20336598	20345691	20324724	20331198	20328452
WHB4122	GUSTO	QIAsymphony DSP DNA Midi Kit	NEBNext UltraII DNA library Prep Kit for Illumina	20336598	20345691	20324724	20331198	20328452
WHB4123	GUSTO	QIAsymphony DSP DNA Midi Kit	NEBNext UltraII DNA library Prep Kit for Illumina	20336598	20345691	20324724	20331198	20328452
WHB4124	GUSTO	QIAsymphony DSP DNA Midi Kit	NEBNext UltraII DNA library Prep Kit for Illumina	20336598	20345691	20324724	20331198	20328452
WHB4125	GUSTO	QIAsymphony DSP DNA Midi Kit	NEBNext UltraII DNA library Prep Kit for Illumina	20336598	20345691	20344239	20331198	20328452
WHB4126	GUSTO	QIAsymphony DSP DNA Midi Kit	NEBNext UltraII DNA library Prep Kit for Illumina	20336598	20345691	20344239	20331198	20328452
WHB4127	GUSTO	QIAsymphony DSP DNA Midi Kit	NEBNext UltraII DNA library Prep Kit for Illumina	20336598	20345691	20324724	20331198	20328452
WHB4128	GUSTO	QIAsymphony DSP DNA Midi Kit	NEBNext UltraII DNA library Prep Kit for Illumina	20336598	20345691	20344239	20331198	20328452
WHB4129	GUSTO	QIAsymphony DSP DNA Midi Kit	NEBNext UltraII DNA library Prep Kit for Illumina	20336598	20345691	20324724	20331198	20328452
WHB4130	GUSTO	QIAsymphony DSP DNA Midi Kit	NEBNext UltraII DNA library Prep Kit for Illumina	20336598	20345691	20344239	20331198	20328452
WHB4131	GUSTO	QIAsymphony DSP DNA Midi Kit	NEBNext UltraII DNA library Prep Kit for Illumina	20336598	20345691	20344239	20331198	20328452
WHB4132	GUSTO	QIAsymphony DSP DNA Midi Kit	NEBNext UltraII DNA library Prep Kit for Illumina	20336598	20345691	20344239	20331198	20328452
WHB4133	GUSTO	QIAsymphony DSP DNA Midi Kit	NEBNext UltraII DNA library Prep Kit for Illumina	20336598	20345691	20344239	20331198	20328452
WHB4134	GUSTO	QIAsymphony DSP DNA Midi Kit	NEBNext UltraII DNA library Prep Kit for Illumina	20336598	20345691	20344239	20331198	20328452
WHB4135	GUSTO	QIAsymphony DSP DNA Midi Kit	NEBNext UltraII DNA library Prep Kit for Illumina	20336598	20345691	20324724	20336625	20328452
WHB4136	GUSTO	QIAsymphony DSP DNA Midi Kit	NEBNext UltraII DNA library Prep Kit for Illumina	20336598	20345691	20344239	20331198	20328452
WHB4137	GUSTO	QIAsymphony DSP DNA Midi Kit	NEBNext UltraII DNA library Prep Kit for Illumina	20336598	20345691	20324724	20336625	20328452
WHB4139	GUSTO	QIAsymphony DSP DNA Midi Kit	NEBNext UltraII DNA library Prep Kit for Illumina	20336598	20345691	20324724	20336625	20328452
WHB4140	GUSTO	QIAsymphony DSP DNA Midi Kit	NEBNext UltraII DNA library Prep Kit for Illumina	20336598	20345691	20324724	20336625	20328452
WHB4141	GUSTO	QIAsymphony DSP DNA Midi Kit	NEBNext UltraII DNA library Prep Kit for Illumina	20336598	20345691	20324724	20331198	20328452
WHB4142	GUSTO	QIAsymphony DSP DNA Midi Kit	NEBNext UltraII DNA library Prep Kit for Illumina	20336598	20345691	20324724	20336625	20328452
WHB4143	GUSTO	QIAsymphony DSP DNA Midi Kit	NEBNext UltraII DNA library Prep Kit for Illumina	20336598	20345691	20324724	20331198	20328452
WHB4144	GUSTO	QIAsymphony DSP DNA Midi Kit	NEBNext UltraII DNA library Prep Kit for Illumina	20336598	20345691	20324724	20331198	20328452
WHB4145	GUSTO	QIAsymphony DSP DNA Midi Kit	NEBNext UltraII DNA library Prep Kit for Illumina	20336598	20345691	20324724	20336625	20328452
WHB4146	GUSTO	QIAsymphony DSP DNA Midi Kit	NEBNext UltraII DNA library Prep Kit for Illumina	20336598	20345691	20324724	20336625	20328452
WHB4147	GUSTO	QIAsymphony DSP DNA Midi Kit	NEBNext UltraII DNA library Prep Kit for Illumina	20336598	20345691	20324724	20331198	20328452
WHB4149	GUSTO	QIAsymphony DSP DNA Midi Kit	NEBNext UltraII DNA library Prep Kit for Illumina	20336598	20345691	20324724	20331198	20328452
WHB4150	GUSTO	QIAsymphony DSP DNA Midi Kit	NEBNext UltraII DNA library Prep Kit for Illumina	20336598	20345691	20324724	20331198	20328452
WHB4151	GUSTO	QIAsymphony DSP DNA Midi Kit	NEBNext UltraII DNA library Prep Kit for Illumina	20336598	20345691	20324724	20331198	20328452
WHB4152	GUSTO	QIAsymphony DSP DNA Midi Kit	NEBNext UltraII DNA library Prep Kit for Illumina	20336598	20345691	20324724	20331198	20328452
WHB4153	GUSTO	QIAsymphony DSP DNA Midi Kit	NEBNext UltraII DNA library Prep Kit for Illumina	20336598	20345691	20324724	20331198	20328452
WHB4154	GUSTO	QIAsymphony DSP DNA Midi Kit	NEBNext UltraII DNA library Prep Kit for Illumina	20336598	20345691	20324724	20331198	20328452
WHB4155	GUSTO	QIAsymphony DSP DNA Midi Kit	NEBNext UltraII DNA library Prep Kit for Illumina	20336598	20345691	20324724	20331198	20328452
WHB4156	GUSTO	QIAsymphony DSP DNA Midi Kit	NEBNext UltraII DNA library Prep Kit for Illumina	20336598	20345691	20324724	20331198	20328452
WHB4157	GUSTO	QIAsymphony DSP DNA Midi Kit	NEBNext UltraII DNA library Prep Kit for Illumina	20336598	20345691	20324724	20331198	20328452
WHB4158	GUSTO	QIAsymphony DSP DNA Midi Kit	NEBNext UltraII DNA library Prep Kit for Illumina	20336598	20345691	20324724	20331198	20328452
WHB4159	GUSTO	QIAsymphony DSP DNA Midi Kit	NEBNext UltraII DNA library Prep Kit for Illumina	20336598	20345691	20324724	20331198	20328452
WHB4160	GUSTO	QIAsymphony DSP DNA Midi Kit	NEBNext UltraII DNA library Prep Kit for Illumina	20336598	20345691	20324724	20331198	20328452
WHB4161	GUSTO	QIAsymphony DSP DNA Midi Kit	NEBNext UltraII DNA library Prep Kit for Illumina	20336598	20345691	20324724	20331198	20328452
WHB4162	GUSTO	QIAsymphony DSP DNA Midi Kit	NEBNext UltraII DNA library Prep Kit for Illumina	20336598	20345691	20324724	20331198	20328452
WHB4163	GUSTO	QIAsymphony DSP DNA Midi Kit	NEBNext UltraII DNA library Prep Kit for Illumina	20336598	20345691	20324724	20331198	20328452
WHB4164	GUSTO	QIAsymphony DSP DNA Midi Kit	NEBNext UltraII DNA library Prep Kit for Illumina	20336598	20345691	20324724	20331198	20328452
WHB4165	GUSTO	QIAsymphony DSP DNA Midi Kit	NEBNext UltraII DNA library Prep Kit for Illumina	20336598	20345691	20324724	20331198	20328452
WHB4166	GUSTO	QIAsymphony DSP DNA Midi Kit	NEBNext UltraII DNA library Prep Kit for Illumina	20336598	20345691	20324724	20331198	20328452
WHB4167	GUSTO	QIAsymphony DSP DNA Midi Kit	NEBNext UltraII DNA library Prep Kit for Illumina	20336598	20345691	20324724	20331198	20328452
WHB4168	GUSTO	QIAsymphony DSP DNA Midi Kit	NEBNext UltraII DNA library Prep Kit for Illumina	20336598	20345691	20324724	20331198	20328452
WHB4169	GUSTO	QIAsymphony DSP DNA Midi Kit	NEBNext UltraII DNA library Prep Kit for Illumina	20336598	20345691	20324724	20331198	20328452
WHB4170	GUSTO	QIAsymphony DSP DNA Midi Kit	NEBNext UltraII DNA library Prep Kit for Illumina	20336598	20345691	20324724	20331198	20328452
WHB4171	GUSTO	QIAsymphony DSP DNA Midi Kit	NEBNext UltraII DNA library Prep Kit for Illumina	20336598	20345691	20324724	20331195	20328452
WHB4172	GUSTO	QIAsymphony DSP DNA Midi Kit	NEBNext UltraII DNA library Prep Kit for Illumina	20336598	20345691	20324724	20331195	20328452
WHB4173	GUSTO	QIAsymphony DSP DNA Midi Kit	NEBNext UltraII DNA library Prep Kit for Illumina	20336598	20345691	20324724	20331198	20328452
WHB4174	GUSTO	QIAsymphony DSP DNA Midi Kit	NEBNext UltraII DNA library Prep Kit for Illumina	20336598	20345691	20324724	20331198	20328452
WHB4175	GUSTO	QIAsymphony DSP DNA Midi Kit	NEBNext UltraII DNA library Prep Kit for Illumina	20336598	20345691	20324724	20331195	20328452
WHB4176	GUSTO	QIAsymphony DSP DNA Midi Kit	NEBNext UltraII DNA library Prep Kit for Illumina	20336598	20345691	20324724	20331198	20328452
WHB4177	GUSTO	QIAsymphony DSP DNA Midi Kit	NEBNext UltraII DNA library Prep Kit for Illumina	20336598	20345691	20324724	20331195	20328452
WHB4178	GUSTO	QIAsymphony DSP DNA Midi Kit	NEBNext UltraII DNA library Prep Kit for Illumina	20336598	20345691	20324724	20331195	20328452
WHB4179	GUSTO	QIAsymphony DSP DNA Midi Kit	NEBNext UltraII DNA library Prep Kit for Illumina	20336598	20345691	20324724	20331195	20328452
WHB4180	GUSTO	QIAsymphony DSP DNA Midi Kit	NEBNext UltraII DNA library Prep Kit for Illumina	20336598	20345691	20324724	20331195	20328452
WHB4181	GUSTO	QIAsymphony DSP DNA Midi Kit	NEBNext UltraII DNA library Prep Kit for Illumina	20336598	20331253	20324724	20331195	20328452
WHB4182	GUSTO	QIAsymphony DSP DNA Midi Kit	NEBNext UltraII DNA library Prep Kit for Illumina	20336598	20345691	20324724	20331195	20328452
WHB4183	GUSTO	QIAsymphony DSP DNA Midi Kit	NEBNext UltraII DNA library Prep Kit for Illumina	20336598	20331253	20324724	20331195	20328452
WHB4184	GUSTO	QIAsymphony DSP DNA Midi Kit	NEBNext UltraII DNA library Prep Kit for Illumina	20336598	20345691	20324724	20331195	20328452
WHB4185	GUSTO	QIAsymphony DSP DNA Midi Kit	NEBNext UltraII DNA library Prep Kit for Illumina	20336598	20345691	20324724	20331195	20328452
WHB4186	GUSTO	QIAsymphony DSP DNA Midi Kit	NEBNext UltraII DNA library Prep Kit for Illumina	20336598	20331253	20324724	20331195	20328452
WHB4187	GUSTO	QIAsymphony DSP DNA Midi Kit	NEBNext UltraII DNA library Prep Kit for Illumina	20336598	20331253	20324724	20331195	20328452
WHB4188	GUSTO	QIAsymphony DSP DNA Midi Kit	NEBNext UltraII DNA library Prep Kit for Illumina	20336598	20331253	20324724	20331195	20328452
WHB4189	GUSTO	QIAsymphony DSP DNA Midi Kit	NEBNext UltraII DNA library Prep Kit for Illumina	20336598	20331253	20324724	20331195	20328452
WHB4190	GUSTO	QIAsymphony DSP DNA Midi Kit	NEBNext UltraII DNA library Prep Kit for Illumina	20336598	20331253	20324724	20331195	20328452
WHB4191	GUSTO	QIAsymphony DSP DNA Midi Kit	NEBNext UltraII DNA library Prep Kit for Illumina	20336598	20331253	20324724	20331195	20328452
WHB4192	GUSTO	QIAsymphony DSP DNA Midi Kit	NEBNext UltraII DNA library Prep Kit for Illumina	20336598	20331253	20324724	20331195	20328452
WHB4193	GUSTO	QIAsymphony DSP DNA Midi Kit	NEBNext UltraII DNA library Prep Kit for Illumina	20336598	20331253	20324724	20331195	20328452
WHB4194	GUSTO	QIAsymphony DSP DNA Midi Kit	NEBNext UltraII DNA library Prep Kit for Illumina	20336598	20345691	20324724	20331198	20328452
WHB4195	GUSTO	QIAsymphony DSP DNA Midi Kit	NEBNext UltraII DNA library Prep Kit for Illumina	20336598	20345691	20324724	20331198	20328452
WHB4196	GUSTO	QIAsymphony DSP DNA Midi Kit	NEBNext UltraII DNA library Prep Kit for Illumina	20336598	20345691	20324724	20331198	20328452
WHB4198	GUSTO	QIAsymphony DSP DNA Midi Kit	NEBNext UltraII DNA library Prep Kit for Illumina	20336598	20345691	20324724	20331198	20328452
WHB4199	GUSTO	QIAsymphony DSP DNA Midi Kit	NEBNext UltraII DNA library Prep Kit for Illumina	20336598	20345691	20324724	20331198	20328452
WHB4200	GUSTO	QIAsymphony DSP DNA Midi Kit	NEBNext UltraII DNA library Prep Kit for Illumina	20336598	20345691	20324724	20331198	20328452
WHB4201	GUSTO	QIAsymphony DSP DNA Midi Kit	NEBNext UltraII DNA library Prep Kit for Illumina	20336598	20345691	20324724	20331198	20328452
WHB4202	GUSTO	QIAsymphony DSP DNA Midi Kit	NEBNext UltraII DNA library Prep Kit for Illumina	20336598	20345691	20324724	20331198	20328452
WHB4203	GUSTO	QIAsymphony DSP DNA Midi Kit	NEBNext UltraII DNA library Prep Kit for Illumina	20336598	20345691	20324724	20331198	20328452
WHB4204	GUSTO	QIAsymphony DSP DNA Midi Kit	NEBNext UltraII DNA library Prep Kit for Illumina	20331242	20345691	20324724	20331195	20328452
WHB4205	GUSTO	QIAsymphony DSP DNA Midi Kit	NEBNext UltraII DNA library Prep Kit for Illumina	20331242	20345691	20324724	20331195	20328452
WHB4206	GUSTO	QIAsymphony DSP DNA Midi Kit	NEBNext UltraII DNA library Prep Kit for Illumina	20331242	20345691	20324724	20331195	20328452
WHB4207	GUSTO	QIAsymphony DSP DNA Midi Kit	NEBNext UltraII DNA library Prep Kit for Illumina	20331242	20345691	20324724	20331195	20328452
WHB4208	GUSTO	QIAsymphony DSP DNA Midi Kit	NEBNext UltraII DNA library Prep Kit for Illumina	20331242	20345691	20324724	20331195	20328452
WHB4209	GUSTO	QIAsymphony DSP DNA Midi Kit	NEBNext UltraII DNA library Prep Kit for Illumina	20331242	20345691	20324724	20331195	20328452
WHB4211	GUSTO	QIAsymphony DSP DNA Midi Kit	NEBNext UltraII DNA library Prep Kit for Illumina	20331242	20345691	20324724	20331198	20328452
WHB4212	GUSTO	QIAsymphony DSP DNA Midi Kit	NEBNext UltraII DNA library Prep Kit for Illumina	20331242	20345691	20324724	20331195	20328452
WHB4213	GUSTO	QIAsymphony DSP DNA Midi Kit	NEBNext UltraII DNA library Prep Kit for Illumina	20331242	20345691	20324724	20331195	20328452
WHB4214	GUSTO	QIAsymphony DSP DNA Midi Kit	NEBNext UltraII DNA library Prep Kit for Illumina	20331242	20345691	20324724	20331195	20328452
WHB4215	GUSTO	QIAsymphony DSP DNA Midi Kit	NEBNext UltraII DNA library Prep Kit for Illumina	20331242	20345691	20324724	20331195	20328452
WHB4216	GUSTO	QIAsymphony DSP DNA Midi Kit	NEBNext UltraII DNA library Prep Kit for Illumina	20331242	20345691	20324724	20331198	20328452
WHB4217	GUSTO	QIAsymphony DSP DNA Midi Kit	NEBNext UltraII DNA library Prep Kit for Illumina	20331242	20345691	20324724	20331198	20328452
WHB4218	GUSTO	QIAsymphony DSP DNA Midi Kit	NEBNext UltraII DNA library Prep Kit for Illumina	20331242	20345691	20324724	20331198	20328452
WHB4219	GUSTO	QIAsymphony DSP DNA Midi Kit	NEBNext UltraII DNA library Prep Kit for Illumina	20331242	20345691	20324724	20331198	20328452
WHB4220	GUSTO	QIAsymphony DSP DNA Midi Kit	NEBNext UltraII DNA library Prep Kit for Illumina	20331242	20345691	20324724	20331198	20328452
WHB4221	GUSTO	QIAsymphony DSP DNA Midi Kit	NEBNext UltraII DNA library Prep Kit for Illumina	20331242	20345691	20324724	20331195	20328452
WHB4222	GUSTO	QIAsymphony DSP DNA Midi Kit	NEBNext UltraII DNA library Prep Kit for Illumina	20331242	20345691	20324724	20331195	20328452
WHB4223	GUSTO	QIAsymphony DSP DNA Midi Kit	NEBNext UltraII DNA library Prep Kit for Illumina	20331242	20345691	20324724	20331198	20328452
WHB4224	GUSTO	QIAsymphony DSP DNA Midi Kit	NEBNext UltraII DNA library Prep Kit for Illumina	20331242	20345691	20324724	20331195	20328452
WHB4225	GUSTO	QIAsymphony DSP DNA Midi Kit	NEBNext UltraII DNA library Prep Kit for Illumina	20331242	20345691	20324724	20331198	20328452
WHB4226	GUSTO	QIAsymphony DSP DNA Midi Kit	NEBNext UltraII DNA library Prep Kit for Illumina	20331242	20345691	20324724	20331198	20328452
WHB4227	GUSTO	QIAsymphony DSP DNA Midi Kit	NEBNext UltraII DNA library Prep Kit for Illumina	20331242	20345691	20324724	20331195	20328452
WHB4228	GUSTO	QIAsymphony DSP DNA Midi Kit	NEBNext UltraII DNA library Prep Kit for Illumina	20331242	20345691	20324724	20331195	20328452
WHB4229	GUSTO	QIAsymphony DSP DNA Midi Kit	NEBNext UltraII DNA library Prep Kit for Illumina	20331242	20345691	20324724	20331195	20328452
WHB4230	GUSTO	QIAsymphony DSP DNA Midi Kit	NEBNext UltraII DNA library Prep Kit for Illumina	20331242	20345691	20324724	20331195	20328452
WHB4231	GUSTO	QIAsymphony DSP DNA Midi Kit	NEBNext UltraII DNA library Prep Kit for Illumina	20331242	20345691	20324724	20331195	20328452
WHB4232	GUSTO	QIAsymphony DSP DNA Midi Kit	NEBNext UltraII DNA library Prep Kit for Illumina	20331242	20345691	20324724	20331195	20328452
WHB4233	GUSTO	QIAsymphony DSP DNA Midi Kit	NEBNext UltraII DNA library Prep Kit for Illumina	20331242	20345691	20324724	20331198	20328452
WHB4234	GUSTO	QIAsymphony DSP DNA Midi Kit	NEBNext UltraII DNA library Prep Kit for Illumina	20336598	20345691	20324724	20331195	20328452
WHB4235	GUSTO	QIAsymphony DSP DNA Midi Kit	NEBNext UltraII DNA library Prep Kit for Illumina	20331242	20345691	20324724	20331195	20328452
WHB4236	GUSTO	QIAsymphony DSP DNA Midi Kit	NEBNext UltraII DNA library Prep Kit for Illumina	20331242	20345691	20324724	20331198	20328452
WHB4237	GUSTO	QIAsymphony DSP DNA Midi Kit	NEBNext UltraII DNA library Prep Kit for Illumina	20331242	20345691	20324724	20331198	20328452
WHB4238	GUSTO	QIAsymphony DSP DNA Midi Kit	NEBNext UltraII DNA library Prep Kit for Illumina	20331242	20345691	20324724	20331198	20328452
WHB4239	GUSTO	QIAsymphony DSP DNA Midi Kit	NEBNext UltraII DNA library Prep Kit for Illumina	20331242	20345691	20324724	20331198	20328452
WHB4240	GUSTO	QIAsymphony DSP DNA Midi Kit	NEBNext UltraII DNA library Prep Kit for Illumina	20331242	20345691	20324724	20331198	20328452
WHB4241	GUSTO	QIAsymphony DSP DNA Midi Kit	NEBNext UltraII DNA library Prep Kit for Illumina	20331242	20345691	20324724	20331198	20328452
WHB4242	GUSTO	QIAsymphony DSP DNA Midi Kit	NEBNext UltraII DNA library Prep Kit for Illumina	20331242	20345691	20324724	20331198	20328452
WHB4243	GUSTO	QIAsymphony DSP DNA Midi Kit	NEBNext UltraII DNA library Prep Kit for Illumina	20331242	20345691	20324724	20331198	20328452
WHB4244	GUSTO	QIAsymphony DSP DNA Midi Kit	NEBNext UltraII DNA library Prep Kit for Illumina	20336598	20345691	20324724	20331195	20328452
WHB4245	GUSTO	QIAsymphony DSP DNA Midi Kit	NEBNext UltraII DNA library Prep Kit for Illumina	20331242	20345691	20324724	20331198	20328452
WHB4246	GUSTO	QIAsymphony DSP DNA Midi Kit	NEBNext UltraII DNA library Prep Kit for Illumina	20336598	20345691	20324724	20331195	20328452
WHB4247	GUSTO	QIAsymphony DSP DNA Midi Kit	NEBNext UltraII DNA library Prep Kit for Illumina	20336598	20345691	20324724	20331195	20328452
WHB4248	GUSTO	QIAsymphony DSP DNA Midi Kit	NEBNext UltraII DNA library Prep Kit for Illumina	20336598	20345691	20324724	20331195	20328452
WHB4249	GUSTO	QIAsymphony DSP DNA Midi Kit	NEBNext UltraII DNA library Prep Kit for Illumina	20336598	20298588	20324724	20331195	20328452
WHB4250	GUSTO	QIAsymphony DSP DNA Midi Kit	NEBNext UltraII DNA library Prep Kit for Illumina	20336598	20345691	20324724	20331195	20328452
WHB4251	GUSTO	QIAsymphony DSP DNA Midi Kit	NEBNext UltraII DNA library Prep Kit for Illumina	20336598	20345691	20324724	20331195	20328452
WHB4252	GUSTO	QIAsymphony DSP DNA Midi Kit	NEBNext UltraII DNA library Prep Kit for Illumina	20336598	20345691	20324724	20331195	20328452
WHB4253	GUSTO	QIAsymphony DSP DNA Midi Kit	NEBNext UltraII DNA library Prep Kit for Illumina	20336598	20298588	20324724	20331195	20328452
WHB4254	GUSTO	QIAsymphony DSP DNA Midi Kit	NEBNext UltraII DNA library Prep Kit for Illumina	20336598	20298588	20324724	20331195	20328452
WHB4255	GUSTO	QIAsymphony DSP DNA Midi Kit	NEBNext UltraII DNA library Prep Kit for Illumina	20336598	20298588	20324724	20331195	20328452
WHB4256	GUSTO	QIAsymphony DSP DNA Midi Kit	NEBNext UltraII DNA library Prep Kit for Illumina	20336598	20298588	20324724	20331195	20328452
WHB4257	GUSTO	QIAsymphony DSP DNA Midi Kit	NEBNext UltraII DNA library Prep Kit for Illumina	20336598	20345691	20324724	20331195	20328452
WHB4258	GUSTO	QIAsymphony DSP DNA Midi Kit	NEBNext UltraII DNA library Prep Kit for Illumina	20336598	20298588	20324724	20331195	20328452
WHB4259	GUSTO	QIAsymphony DSP DNA Midi Kit	NEBNext UltraII DNA library Prep Kit for Illumina	20336598	20345691	20324724	20331195	20328452
WHB4260	GUSTO	QIAsymphony DSP DNA Midi Kit	NEBNext UltraII DNA library Prep Kit for Illumina	20336598	20298588	20324724	20331195	20328452
WHB4261	GUSTO	QIAsymphony DSP DNA Midi Kit	NEBNext UltraII DNA library Prep Kit for Illumina	20336598	20298588	20324724	20331195	20328452
WHB4262	GUSTO	QIAsymphony DSP DNA Midi Kit	NEBNext UltraII DNA library Prep Kit for Illumina	20336598	20298588	20324724	20331195	20328452
WHB4263	GUSTO	QIAsymphony DSP DNA Midi Kit	NEBNext UltraII DNA library Prep Kit for Illumina	20336598	20298588	20324724	20331195	20328452
WHB4264	GUSTO	QIAsymphony DSP DNA Midi Kit	NEBNext UltraII DNA library Prep Kit for Illumina	20336598	20345691	20324724	20331198	20328452
WHB4265	GUSTO	QIAsymphony DSP DNA Midi Kit	NEBNext UltraII DNA library Prep Kit for Illumina	20336598	20345691	20324724	20331198	20328452
WHB4266	GUSTO	QIAsymphony DSP DNA Midi Kit	NEBNext UltraII DNA library Prep Kit for Illumina	20336598	20345691	20324724	20331198	20328452
WHB4267	GUSTO	QIAsymphony DSP DNA Midi Kit	NEBNext UltraII DNA library Prep Kit for Illumina	20336598	20345691	20324724	20331198	20328452
WHB4268	GUSTO	QIAsymphony DSP DNA Midi Kit	NEBNext UltraII DNA library Prep Kit for Illumina	20336598	20345691	20324724	20331198	20328452
WHB4269	GUSTO	QIAsymphony DSP DNA Midi Kit	NEBNext UltraII DNA library Prep Kit for Illumina	20336598	20345691	20324724	20331198	20328452
WHB4270	GUSTO	QIAsymphony DSP DNA Midi Kit	NEBNext UltraII DNA library Prep Kit for Illumina	20336598	20345691	20324724	20331198	20328452
WHB4272	GUSTO	QIAsymphony DSP DNA Midi Kit	NEBNext UltraII DNA library Prep Kit for Illumina	20336598	20345691	20324724	20331198	20328452
WHB4273	GUSTO	QIAsymphony DSP DNA Midi Kit	NEBNext UltraII DNA library Prep Kit for Illumina	20331242	20345691	20324724	20331198	20328452
WHB4274	GUSTO	QIAsymphony DSP DNA Midi Kit	NEBNext UltraII DNA library Prep Kit for Illumina	20331242	20345691	20324724	20331198	20328452
WHB4275	GUSTO	QIAsymphony DSP DNA Midi Kit	NEBNext UltraII DNA library Prep Kit for Illumina	20331242	20345691	20324724	20331198	20328452
WHB4276	GUSTO	QIAsymphony DSP DNA Midi Kit	NEBNext UltraII DNA library Prep Kit for Illumina	20331242	20345691	20324724	20331198	20328452
WHB4277	GUSTO	QIAsymphony DSP DNA Midi Kit	NEBNext UltraII DNA library Prep Kit for Illumina	20336598	20345691	20324724	20331198	20328452
WHB4278	GUSTO	QIAsymphony DSP DNA Midi Kit	NEBNext UltraII DNA library Prep Kit for Illumina	20331242	20345691	20324724	20331198	20328452
WHB4279	GUSTO	QIAsymphony DSP DNA Midi Kit	NEBNext UltraII DNA library Prep Kit for Illumina	20331242	20345691	20324724	20331198	20328452
WHB4280	GUSTO	QIAsymphony DSP DNA Midi Kit	NEBNext UltraII DNA library Prep Kit for Illumina	20331242	20331251	20324724	20331198	20328452
WHB4281	GUSTO	QIAsymphony DSP DNA Midi Kit	NEBNext UltraII DNA library Prep Kit for Illumina	20331242	20331251	20324724	20331198	20328452
WHB4282	GUSTO	QIAsymphony DSP DNA Midi Kit	NEBNext UltraII DNA library Prep Kit for Illumina	20331242	20345691	20324724	20331198	20328452
WHB4283	GUSTO	QIAsymphony DSP DNA Midi Kit	NEBNext UltraII DNA library Prep Kit for Illumina	20331242	20345691	20324724	20331198	20328452
WHB4284	GUSTO	QIAsymphony DSP DNA Midi Kit	NEBNext UltraII DNA library Prep Kit for Illumina	20331242	20345691	20324724	20331198	20328452
WHB4285	GUSTO	QIAsymphony DSP DNA Midi Kit	NEBNext UltraII DNA library Prep Kit for Illumina	20331242	20331251	20324724	20331198	20328452
WHB4286	GUSTO	QIAsymphony DSP DNA Midi Kit	NEBNext UltraII DNA library Prep Kit for Illumina	20331242	20331251	20324724	20331198	20328452
WHB4287	GUSTO	QIAsymphony DSP DNA Midi Kit	NEBNext UltraII DNA library Prep Kit for Illumina	20331242	20345691	20324724	20331198	20328452
WHB4288	GUSTO	QIAsymphony DSP DNA Midi Kit	NEBNext UltraII DNA library Prep Kit for Illumina	20331242	20345691	20324724	20331198	20328452
WHB4289	GUSTO	QIAsymphony DSP DNA Midi Kit	NEBNext UltraII DNA library Prep Kit for Illumina	20331242	20331251	20324724	20331198	20328452
WHB4290	GUSTO	QIAsymphony DSP DNA Midi Kit	NEBNext UltraII DNA library Prep Kit for Illumina	20331242	20331251	20324724	20331198	20328452
WHB4291	GUSTO	QIAsymphony DSP DNA Midi Kit	NEBNext UltraII DNA library Prep Kit for Illumina	20331242	20331251	20324724	20331198	20328452
WHB4292	GUSTO	QIAsymphony DSP DNA Midi Kit	NEBNext UltraII DNA library Prep Kit for Illumina	20331242	20331251	20324724	20331198	20328452
WHB4293	GUSTO	QIAsymphony DSP DNA Midi Kit	NEBNext UltraII DNA library Prep Kit for Illumina	20331242	20331251	20324724	20331198	20328452
WHB4294	GUSTO	QIAsymphony DSP DNA Midi Kit	NEBNext UltraII DNA library Prep Kit for Illumina	20331242	20345691	20324724	20331198	20328452
WHB4295	GUSTO	QIAsymphony DSP DNA Midi Kit	NEBNext UltraII DNA library Prep Kit for Illumina	20331242	20345691	20324724	20331198	20328452
WHB4296	GUSTO	QIAsymphony DSP DNA Midi Kit	NEBNext UltraII DNA library Prep Kit for Illumina	20331242	20345691	20324724	20331198	20328452
WHB4297	GUSTO	QIAsymphony DSP DNA Midi Kit	NEBNext UltraII DNA library Prep Kit for Illumina	20331242	20331251	20324724	20331198	20328452
WHB4298	GUSTO	QIAsymphony DSP DNA Midi Kit	NEBNext UltraII DNA library Prep Kit for Illumina	20331242	20345691	20324724	20331198	20328452
WHB4299	GUSTO	QIAsymphony DSP DNA Midi Kit	NEBNext UltraII DNA library Prep Kit for Illumina	20331242	20345691	20324724	20331198	20328452
WHB4300	GUSTO	QIAsymphony DSP DNA Midi Kit	NEBNext UltraII DNA library Prep Kit for Illumina	20331242	20345691	20324724	20331198	20328452
WHB4301	GUSTO	QIAsymphony DSP DNA Midi Kit	NEBNext UltraII DNA library Prep Kit for Illumina	20331242	20345691	20324724	20331198	20328452
WHB4302	GUSTO	QIAsymphony DSP DNA Midi Kit	NEBNext UltraII DNA library Prep Kit for Illumina	20331242	20345691	20324724	20331198	20328452
WHB4303	GUSTO	QIAsymphony DSP DNA Midi Kit	NEBNext UltraII DNA library Prep Kit for Illumina	20331242	20345691	20344239	20331198	20335773
WHB4304	GUSTO	QIAsymphony DSP DNA Midi Kit	NEBNext UltraII DNA library Prep Kit for Illumina	20331242	20345691	20324724	20331198	20328452
WHB4305	GUSTO	QIAsymphony DSP DNA Midi Kit	NEBNext UltraII DNA library Prep Kit for Illumina	20331242	20345691	20344239	20331195	20328452
WHB4306	GUSTO	QIAsymphony DSP DNA Midi Kit	NEBNext UltraII DNA library Prep Kit for Illumina	20331242	20345691	20344239	20331195	20328452
WHB4307	GUSTO	QIAsymphony DSP DNA Midi Kit	NEBNext UltraII DNA library Prep Kit for Illumina	20331242	20345691	20344239	20331195	20328452
WHB4308	GUSTO	QIAsymphony DSP DNA Midi Kit	NEBNext UltraII DNA library Prep Kit for Illumina	20331242	20345691	20344239	20331195	20328452
WHB4309	GUSTO	QIAsymphony DSP DNA Midi Kit	NEBNext UltraII DNA library Prep Kit for Illumina	20331242	20345691	20344239	20331195	20328452
WHB4310	GUSTO	QIAsymphony DSP DNA Midi Kit	NEBNext UltraII DNA library Prep Kit for Illumina	20331242	20345691	20344239	20331195	20328452
WHB4311	GUSTO	QIAsymphony DSP DNA Midi Kit	NEBNext UltraII DNA library Prep Kit for Illumina	20331242	20345691	20344239	20331195	20328452
WHB4312	GUSTO	QIAsymphony DSP DNA Midi Kit	NEBNext UltraII DNA library Prep Kit for Illumina	20331242	20345691	20344239	20331195	20328452
WHB4313	GUSTO	QIAsymphony DSP DNA Midi Kit	NEBNext UltraII DNA library Prep Kit for Illumina	20331242	20345691	20344239	20331195	20328452
WHB4314	GUSTO	QIAsymphony DSP DNA Midi Kit	NEBNext UltraII DNA library Prep Kit for Illumina	20331242	20345691	20344239	20331198	20335773
WHB4315	GUSTO	QIAsymphony DSP DNA Midi Kit	NEBNext UltraII DNA library Prep Kit for Illumina	20331242	20345691	20344239	20331195	20328452
WHB4316	GUSTO	QIAsymphony DSP DNA Midi Kit	NEBNext UltraII DNA library Prep Kit for Illumina	20331242	20345691	20344239	20331198	20335773
WHB4317	GUSTO	QIAsymphony DSP DNA Midi Kit	NEBNext UltraII DNA library Prep Kit for Illumina	20331242	20345691	20344239	20331198	20335773
WHB4318	GUSTO	QIAsymphony DSP DNA Midi Kit	NEBNext UltraII DNA library Prep Kit for Illumina	20331242	20345691	20344239	20331198	20335773
WHB4319	GUSTO	QIAsymphony DSP DNA Midi Kit	NEBNext UltraII DNA library Prep Kit for Illumina	20331242	20345691	20344239	20331198	20335773
WHB4320	GUSTO	QIAsymphony DSP DNA Midi Kit	NEBNext UltraII DNA library Prep Kit for Illumina	20331242	20345691	20344239	20331198	20335773
WHB4321	GUSTO	QIAsymphony DSP DNA Midi Kit	NEBNext UltraII DNA library Prep Kit for Illumina	20331242	20345691	20344239	20331198	20335773
WHB4322	GUSTO	QIAsymphony DSP DNA Midi Kit	NEBNext UltraII DNA library Prep Kit for Illumina	20331242	20345691	20344239	20331198	20335773
WHB4323	GUSTO	QIAsymphony DSP DNA Midi Kit	NEBNext UltraII DNA library Prep Kit for Illumina	20331242	20345691	20344239	20331198	20335773
WHB4325	GUSTO	QIAsymphony DSP DNA Midi Kit	NEBNext UltraII DNA library Prep Kit for Illumina	20331242	20336632	20344239	20331198	20335773
WHB4326	GUSTO	QIAsymphony DSP DNA Midi Kit	NEBNext UltraII DNA library Prep Kit for Illumina	20331242	20345691	20344239	20331198	20335773
WHB4327	GUSTO	QIAsymphony DSP DNA Midi Kit	NEBNext UltraII DNA library Prep Kit for Illumina	20331242	20345691	20344239	20331198	20335773
WHB4328	GUSTO	QIAsymphony DSP DNA Midi Kit	NEBNext UltraII DNA library Prep Kit for Illumina	20331242	20345691	20344239	20331198	20335773
WHB4329	GUSTO	QIAsymphony DSP DNA Midi Kit	NEBNext UltraII DNA library Prep Kit for Illumina	20331242	20345691	20344239	20331198	20335773
WHB4330	GUSTO	QIAsymphony DSP DNA Midi Kit	NEBNext UltraII DNA library Prep Kit for Illumina	20331242	20345691	20344239	20331198	20335773
WHB4331	GUSTO	QIAsymphony DSP DNA Midi Kit	NEBNext UltraII DNA library Prep Kit for Illumina	20331242	20345691	20344239	20340288	20328452
WHB4332	GUSTO	QIAsymphony DSP DNA Midi Kit	NEBNext UltraII DNA library Prep Kit for Illumina	20331242	20345691	20344239	20331198	20335773
WHB4333	GUSTO	QIAsymphony DSP DNA Midi Kit	NEBNext UltraII DNA library Prep Kit for Illumina	20331242	20345691	20344239	20340288	20328452
WHB4334	GUSTO	QIAsymphony DSP DNA Midi Kit	NEBNext UltraII DNA library Prep Kit for Illumina	20331242	20345691	20344239	20331198	20335773
WHB4335	GUSTO	QIAsymphony DSP DNA Midi Kit	NEBNext UltraII DNA library Prep Kit for Illumina	20331242	20345691	20344239	20331198	20335773
WHB4336	GUSTO	QIAsymphony DSP DNA Midi Kit	NEBNext UltraII DNA library Prep Kit for Illumina	20331242	20336632	20344239	20331198	20335773
WHB4337	GUSTO	QIAsymphony DSP DNA Midi Kit	NEBNext UltraII DNA library Prep Kit for Illumina	20331242	20336632	20344239	20331198	20335773
WHB4338	GUSTO	QIAsymphony DSP DNA Midi Kit	NEBNext UltraII DNA library Prep Kit for Illumina	20331242	20345691	20344239	20331198	20335773
WHB4339	GUSTO	QIAsymphony DSP DNA Midi Kit	NEBNext UltraII DNA library Prep Kit for Illumina	20331242	20336632	20344239	20331198	20335773
WHB4340	GUSTO	QIAsymphony DSP DNA Midi Kit	NEBNext UltraII DNA library Prep Kit for Illumina	20331242	20336632	20344239	20331198	20335773
WHB4341	GUSTO	QIAsymphony DSP DNA Midi Kit	NEBNext UltraII DNA library Prep Kit for Illumina	20331242	20336632	20344239	20331198	20335773
WHB4342	GUSTO	QIAsymphony DSP DNA Midi Kit	NEBNext UltraII DNA library Prep Kit for Illumina	20331242	20336632	20344239	20331198	20335773
WHB4343	GUSTO	QIAsymphony DSP DNA Midi Kit	NEBNext UltraII DNA library Prep Kit for Illumina	20331242	20336632	20344239	20331198	20335773
WHB4344	GUSTO	QIAsymphony DSP DNA Midi Kit	NEBNext UltraII DNA library Prep Kit for Illumina	20331242	20345691	20344239	20331198	20328452
WHB4345	GUSTO	QIAsymphony DSP DNA Midi Kit	NEBNext UltraII DNA library Prep Kit for Illumina	20331242	20336632	20344239	20331198	20335773
WHB4346	GUSTO	QIAsymphony DSP DNA Midi Kit	NEBNext UltraII DNA library Prep Kit for Illumina	20331242	20336632	20344239	20331198	20335773
WHB4347	GUSTO	QIAsymphony DSP DNA Midi Kit	NEBNext UltraII DNA library Prep Kit for Illumina	20331242	20345691	20344239	20331198	20328452
WHB4348	GUSTO	QIAsymphony DSP DNA Midi Kit	NEBNext UltraII DNA library Prep Kit for Illumina	20331242	20345691	20344239	20331198	20328452
WHB4349	GUSTO	QIAsymphony DSP DNA Midi Kit	NEBNext UltraII DNA library Prep Kit for Illumina	20331242	20345691	20344239	20331198	20328452
WHB4350	GUSTO	QIAsymphony DSP DNA Midi Kit	NEBNext UltraII DNA library Prep Kit for Illumina	20331242	20345691	20344239	20331198	20328452
WHB4351	GUSTO	QIAsymphony DSP DNA Midi Kit	NEBNext UltraII DNA library Prep Kit for Illumina	20331242	20345691	20344239	20331198	20328452
WHB4352	GUSTO	QIAsymphony DSP DNA Midi Kit	NEBNext UltraII DNA library Prep Kit for Illumina	20331242	20345691	20344239	20331198	20328452
WHB4353	GUSTO	QIAsymphony DSP DNA Midi Kit	NEBNext UltraII DNA library Prep Kit for Illumina	20331242	20345691	20344239	20331198	20328452
WHB4354	GUSTO	QIAsymphony DSP DNA Midi Kit	NEBNext UltraII DNA library Prep Kit for Illumina	20331242	20345691	20344239	20331198	20328452
WHB4355	GUSTO	QIAsymphony DSP DNA Midi Kit	NEBNext UltraII DNA library Prep Kit for Illumina	20331242	20345691	20344239	20331198	20328452
WHB4356	GUSTO	QIAsymphony DSP DNA Midi Kit	NEBNext UltraII DNA library Prep Kit for Illumina	20331242	20345691	20344239	20340288	20328452
WHB4357	GUSTO	QIAsymphony DSP DNA Midi Kit	NEBNext UltraII DNA library Prep Kit for Illumina	20331242	20345691	20344239	20340288	20328452
WHB4358	GUSTO	QIAsymphony DSP DNA Midi Kit	NEBNext UltraII DNA library Prep Kit for Illumina	20340298	20336632	20344239	20340288	20335773
WHB4359	GUSTO	QIAsymphony DSP DNA Midi Kit	NEBNext UltraII DNA library Prep Kit for Illumina	20331242	20345691	20344239	20340288	20328452
WHB4360	GUSTO	QIAsymphony DSP DNA Midi Kit	NEBNext UltraII DNA library Prep Kit for Illumina	20340298	20336632	20344239	20340288	20335773
WHB4361	GUSTO	QIAsymphony DSP DNA Midi Kit	NEBNext UltraII DNA library Prep Kit for Illumina	20340298	20336632	20344239	20340288	20335773
WHB4362	GUSTO	QIAsymphony DSP DNA Midi Kit	NEBNext UltraII DNA library Prep Kit for Illumina	20331242	20345691	20344239	20340288	20328452
WHB4363	GUSTO	QIAsymphony DSP DNA Midi Kit	NEBNext UltraII DNA library Prep Kit for Illumina	20331242	20345691	20344239	20340288	20328452
WHB4364	GUSTO	QIAsymphony DSP DNA Midi Kit	NEBNext UltraII DNA library Prep Kit for Illumina	20340298	20336632	20344239	20340288	20335773
WHB4365	GUSTO	QIAsymphony DSP DNA Midi Kit	NEBNext UltraII DNA library Prep Kit for Illumina	20340298	20336632	20344239	20340288	20335773
WHB4366	GUSTO	QIAsymphony DSP DNA Midi Kit	NEBNext UltraII DNA library Prep Kit for Illumina	20340298	20336632	20324724	20340288	20335773
WHB4367	GUSTO	QIAsymphony DSP DNA Midi Kit	NEBNext UltraII DNA library Prep Kit for Illumina	20340298	20336632	20344239	20340288	20335773
WHB4368	GUSTO	QIAsymphony DSP DNA Midi Kit	NEBNext UltraII DNA library Prep Kit for Illumina	20340298	20336632	20324724	20340288	20335773
WHB4369	GUSTO	QIAsymphony DSP DNA Midi Kit	NEBNext UltraII DNA library Prep Kit for Illumina	20340298	20336632	20344239	20340288	20335773
WHB4370	GUSTO	QIAsymphony DSP DNA Midi Kit	NEBNext UltraII DNA library Prep Kit for Illumina	20340298	20336632	20324724	20340288	20335773
WHB4371	GUSTO	QIAsymphony DSP DNA Midi Kit	NEBNext UltraII DNA library Prep Kit for Illumina	20340298	20336632	20344239	20340288	20335773
WHB4372	GUSTO	QIAsymphony DSP DNA Midi Kit	NEBNext UltraII DNA library Prep Kit for Illumina	20340298	20336632	20344239	20340288	20335773
WHB4373	GUSTO	QIAsymphony DSP DNA Midi Kit	NEBNext UltraII DNA library Prep Kit for Illumina	20331242	20345691	20344239	20340288	20328452
WHB4374	GUSTO	QIAsymphony DSP DNA Midi Kit	NEBNext UltraII DNA library Prep Kit for Illumina	20340298	20336632	20344239	20340288	20335773
WHB4375	GUSTO	QIAsymphony DSP DNA Midi Kit	NEBNext UltraII DNA library Prep Kit for Illumina	20340298	20336632	20324724	20340288	20335773
WHB4376	GUSTO	QIAsymphony DSP DNA Midi Kit	NEBNext UltraII DNA library Prep Kit for Illumina	20340298	20336632	20324724	20340288	20335773
WHB4377	GUSTO	QIAsymphony DSP DNA Midi Kit	NEBNext UltraII DNA library Prep Kit for Illumina	20340298	20336632	20324724	20340288	20335773
WHB4378	GUSTO	QIAsymphony DSP DNA Midi Kit	NEBNext UltraII DNA library Prep Kit for Illumina	20340298	20336632	20324724	20340288	20335773
WHB4379	GUSTO	QIAsymphony DSP DNA Midi Kit	NEBNext UltraII DNA library Prep Kit for Illumina	20340298	20336632	20324724	20340288	20335773
WHB4380	GUSTO	QIAsymphony DSP DNA Midi Kit	NEBNext UltraII DNA library Prep Kit for Illumina	20340298	20336632	20324724	20340288	20335773
WHB4381	GUSTO	QIAsymphony DSP DNA Midi Kit	NEBNext UltraII DNA library Prep Kit for Illumina	20340298	20336632	20324724	20340288	20335773
WHB4382	GUSTO	QIAsymphony DSP DNA Midi Kit	NEBNext UltraII DNA library Prep Kit for Illumina	20340298	20336632	20344239	20340288	20335773
WHB4383	GUSTO	QIAsymphony DSP DNA Midi Kit	NEBNext UltraII DNA library Prep Kit for Illumina	20340298	20336632	20344239	20340288	20335773
WHB4384	GUSTO	QIAsymphony DSP DNA Midi Kit	NEBNext UltraII DNA library Prep Kit for Illumina	20340298	20336632	20344239	20340288	20335773
WHB4385	GUSTO	QIAsymphony DSP DNA Midi Kit	NEBNext UltraII DNA library Prep Kit for Illumina	20340298	20336632	20324724	20340288	20335773
WHB4386	GUSTO	QIAsymphony DSP DNA Midi Kit	NEBNext UltraII DNA library Prep Kit for Illumina	20340298	20336632	20344239	20340288	20335773
WHB4387	GUSTO	QIAsymphony DSP DNA Midi Kit	NEBNext UltraII DNA library Prep Kit for Illumina	20340298	20336632	20344239	20340288	20335773
WHB4388	GUSTO	QIAsymphony DSP DNA Midi Kit	NEBNext UltraII DNA library Prep Kit for Illumina	20340298	20336632	20344239	20340288	20335773
WHB4389	GUSTO	QIAsymphony DSP DNA Midi Kit	NEBNext UltraII DNA library Prep Kit for Illumina	20340298	20336632	20344239	20340288	20335773
WHB4390	GUSTO	QIAsymphony DSP DNA Midi Kit	NEBNext UltraII DNA library Prep Kit for Illumina	20340298	20336632	20344239	20340288	20335773
WHB4391	GUSTO	QIAsymphony DSP DNA Midi Kit	NEBNext UltraII DNA library Prep Kit for Illumina	20340298	20336632	20344239	20340288	20335773
WHB4392	GUSTO	QIAsymphony DSP DNA Midi Kit	NEBNext UltraII DNA library Prep Kit for Illumina	20340298	20336632	20344239	20340288	20335773
WHB4393	GUSTO	QIAsymphony DSP DNA Midi Kit	NEBNext UltraII DNA library Prep Kit for Illumina	20331242	20336632	20324724	20340288	20335774
WHB4394	GUSTO	QIAsymphony DSP DNA Midi Kit	NEBNext UltraII DNA library Prep Kit for Illumina	20340298	20336632	20324724	20340288	20335773
WHB4395	GUSTO	QIAsymphony DSP DNA Midi Kit	NEBNext UltraII DNA library Prep Kit for Illumina	20340298	20336632	20324724	20340288	20335773
WHB4396	GUSTO	QIAsymphony DSP DNA Midi Kit	NEBNext UltraII DNA library Prep Kit for Illumina	20340298	20336632	20324724	20340288	20335773
WHB4397	GUSTO	QIAsymphony DSP DNA Midi Kit	NEBNext UltraII DNA library Prep Kit for Illumina	20331242	20345691	20344239	20340288	20328452
WHB4398	GUSTO	QIAsymphony DSP DNA Midi Kit	NEBNext UltraII DNA library Prep Kit for Illumina	20340298	20336632	20324724	20340288	20335773
WHB4399	GUSTO	QIAsymphony DSP DNA Midi Kit	NEBNext UltraII DNA library Prep Kit for Illumina	20340298	20336632	20324724	20340288	20335773
WHB4400	GUSTO	QIAsymphony DSP DNA Midi Kit	NEBNext UltraII DNA library Prep Kit for Illumina	20340298	20336632	20324724	20340288	20335773
WHB4401	GUSTO	QIAsymphony DSP DNA Midi Kit	NEBNext UltraII DNA library Prep Kit for Illumina	20340298	20336632	20324724	20340288	20335773
WHB4402	GUSTO	QIAsymphony DSP DNA Midi Kit	NEBNext UltraII DNA library Prep Kit for Illumina	20340298	20336632	20324724	20340288	20335773
WHB4403	GUSTO	QIAsymphony DSP DNA Midi Kit	NEBNext UltraII DNA library Prep Kit for Illumina	20340298	20336632	20324724	20340288	20335773
WHB4404	GUSTO	QIAsymphony DSP DNA Midi Kit	NEBNext UltraII DNA library Prep Kit for Illumina	20340298	20336632	20344239	20340288	20335773
WHB4405	GUSTO	QIAsymphony DSP DNA Midi Kit	NEBNext UltraII DNA library Prep Kit for Illumina	20331242	20345691	20344239	20340288	20328452
WHB4406	GUSTO	QIAsymphony DSP DNA Midi Kit	NEBNext UltraII DNA library Prep Kit for Illumina	20340298	20336632	20344239	20340288	20335773
WHB4407	GUSTO	QIAsymphony DSP DNA Midi Kit	NEBNext UltraII DNA library Prep Kit for Illumina	20340298	20336632	20344239	20340288	20335773
WHB4408	GUSTO	QIAsymphony DSP DNA Midi Kit	NEBNext UltraII DNA library Prep Kit for Illumina	20340298	20336632	20344239	20340288	20335773
WHB4409	GUSTO	QIAsymphony DSP DNA Midi Kit	NEBNext UltraII DNA library Prep Kit for Illumina	20340298	20336632	20344239	20340288	20335773
WHB4410	GUSTO	QIAsymphony DSP DNA Midi Kit	NEBNext UltraII DNA library Prep Kit for Illumina	20340298	20336632	20344239	20340288	20335773
WHB4411	GUSTO	QIAsymphony DSP DNA Midi Kit	NEBNext UltraII DNA library Prep Kit for Illumina	20340298	20336632	20344239	20340288	20335773
WHB4412	GUSTO	QIAsymphony DSP DNA Midi Kit	NEBNext UltraII DNA library Prep Kit for Illumina	20340298	20336632	20344239	20340288	20335773
WHB4413	GUSTO	QIAsymphony DSP DNA Midi Kit	NEBNext UltraII DNA library Prep Kit for Illumina	20331242	20336632	20324724	20340288	20335774
WHB4414	GUSTO	QIAsymphony DSP DNA Midi Kit	NEBNext UltraII DNA library Prep Kit for Illumina	20331242	20336632	20324724	20340288	20335774
WHB4415	GUSTO	QIAsymphony DSP DNA Midi Kit	NEBNext UltraII DNA library Prep Kit for Illumina	20340298	20336632	20344239	20340288	20335773
WHB4416	GUSTO	QIAsymphony DSP DNA Midi Kit	NEBNext UltraII DNA library Prep Kit for Illumina	20340298	20336632	20344239	20340288	20335773
[truncated: 7,771 more rows]
